# Supplementary material for: Mutant p53-dependent mitochondrial metabolic alterations in a mesenchymal stem cell-based model of progressive malignancy
Source: PubMed Central journal article supplement (PMC6748146; doi:10.1038/s41418-018-0227-z), 2018-11-09

**Figure S1**

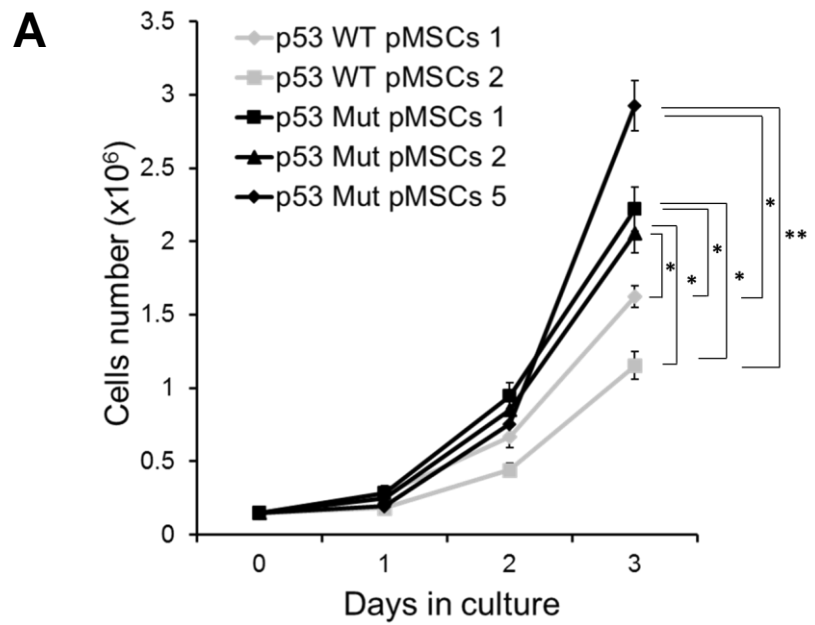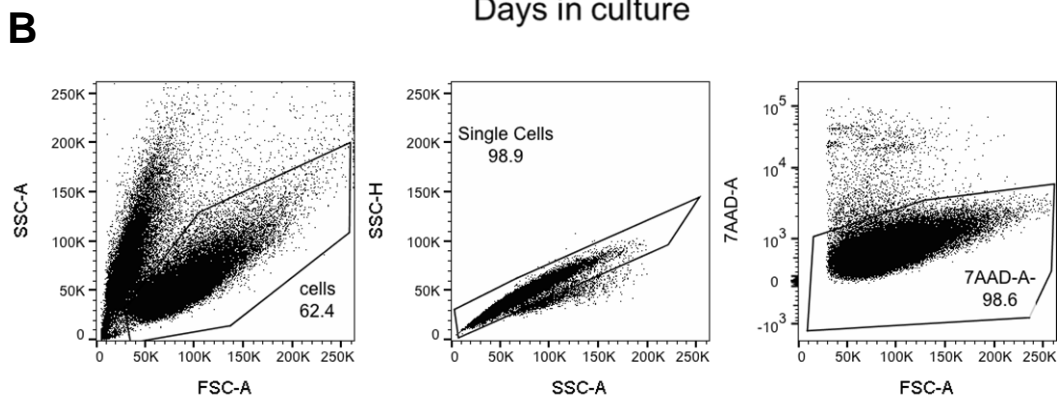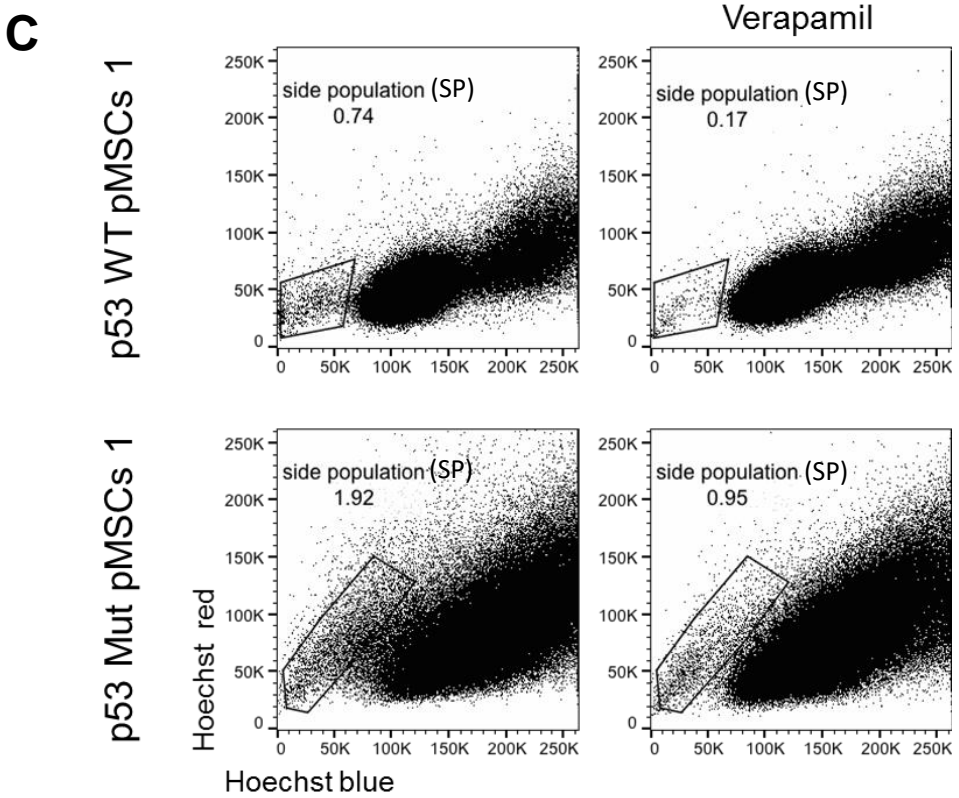

**Figure S1**

**D**

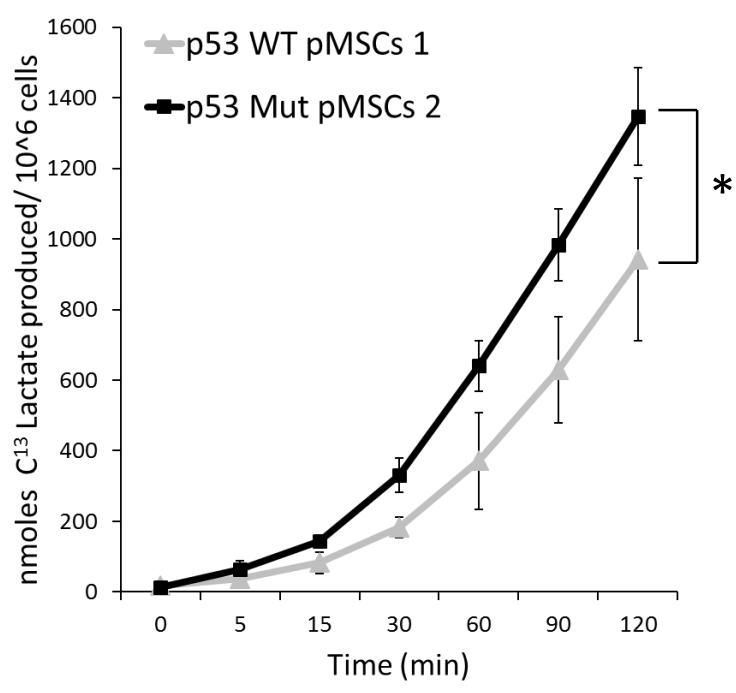

**E**

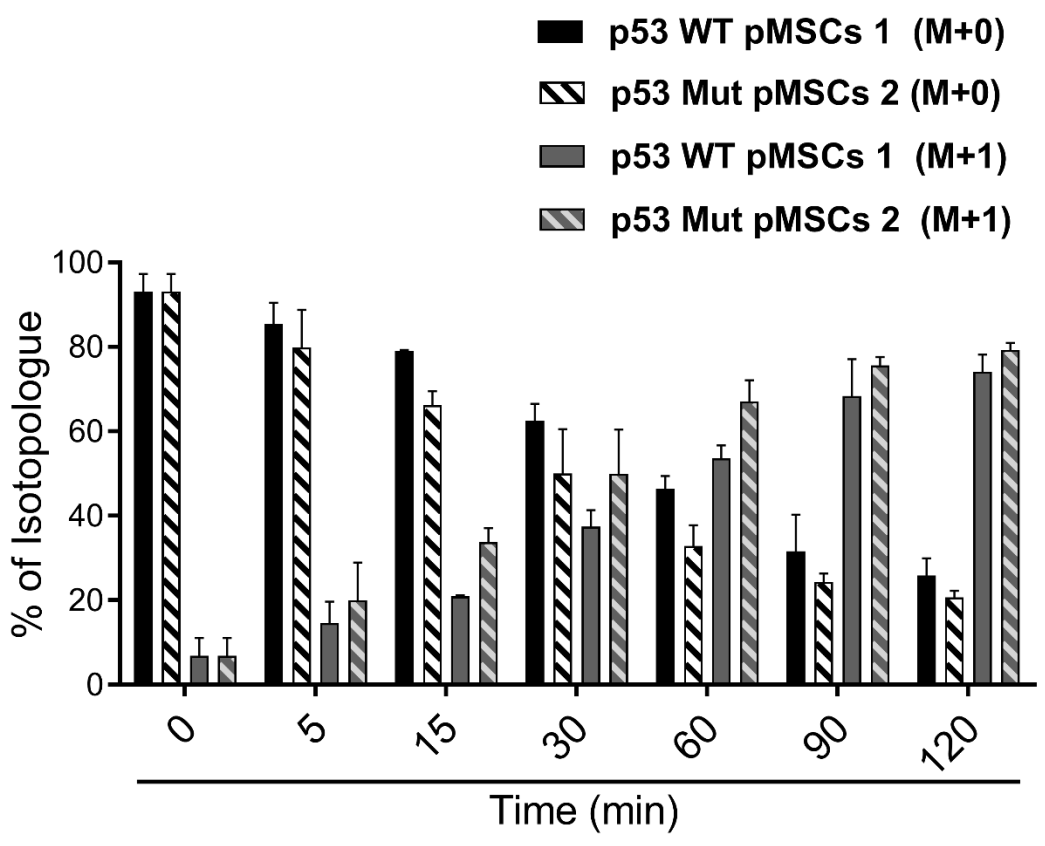

# Figure S1

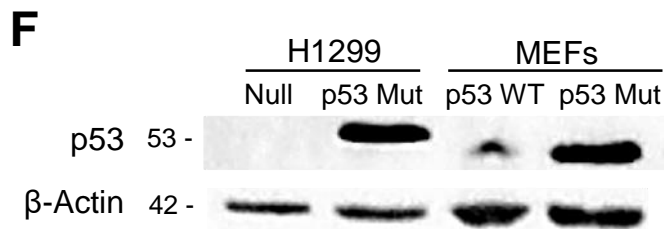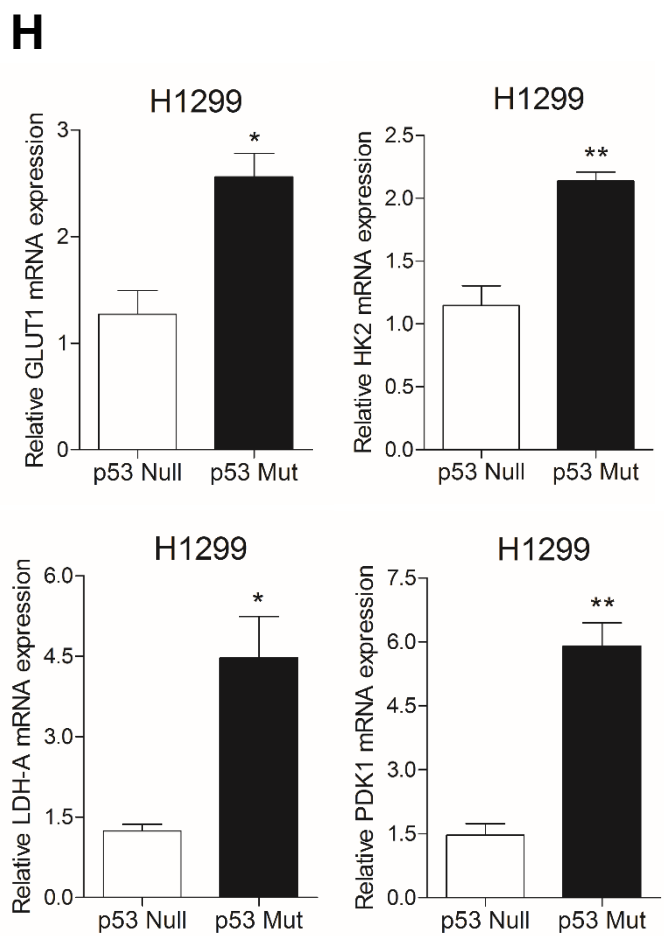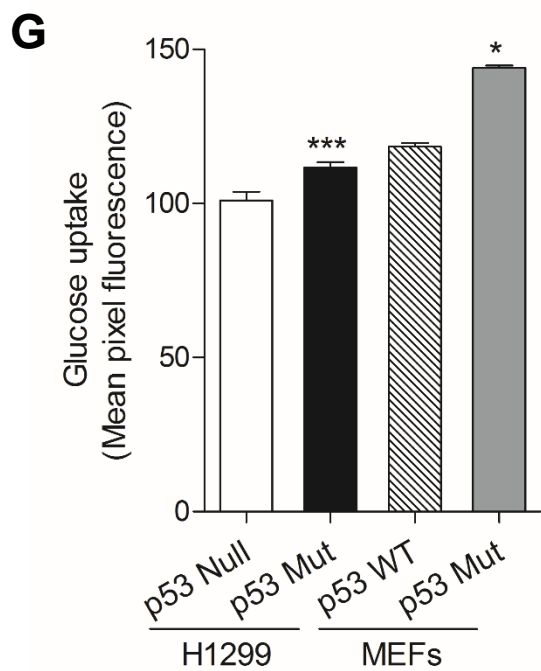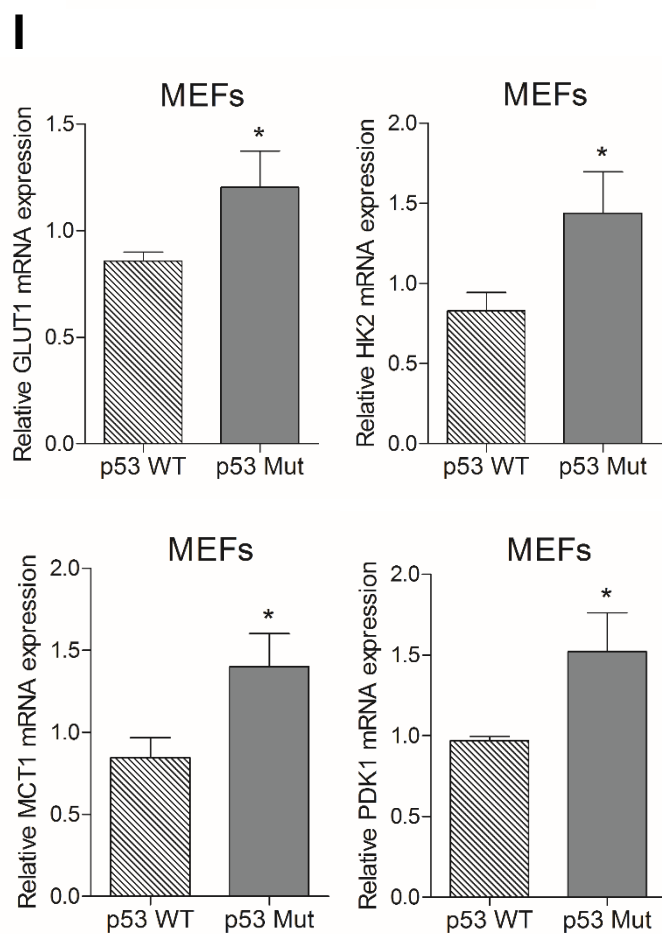

**Figure S2**

**A**

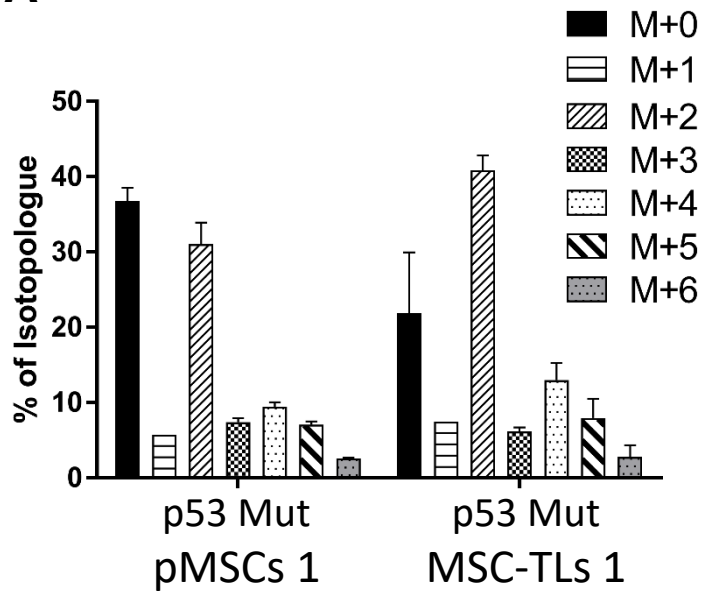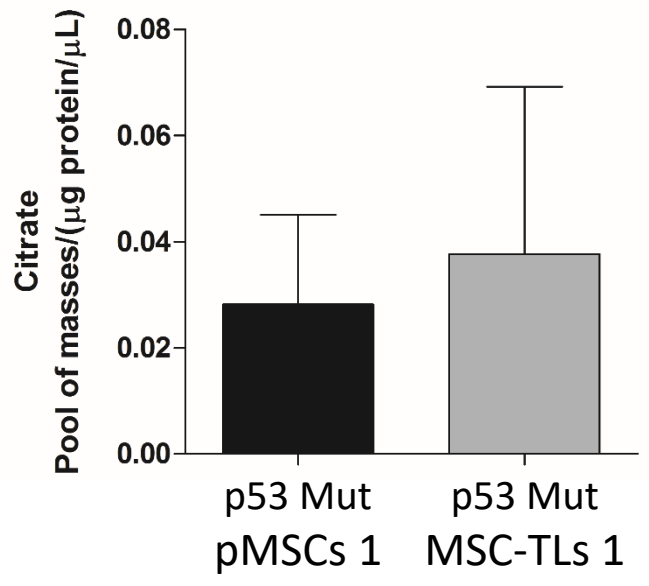

**B**

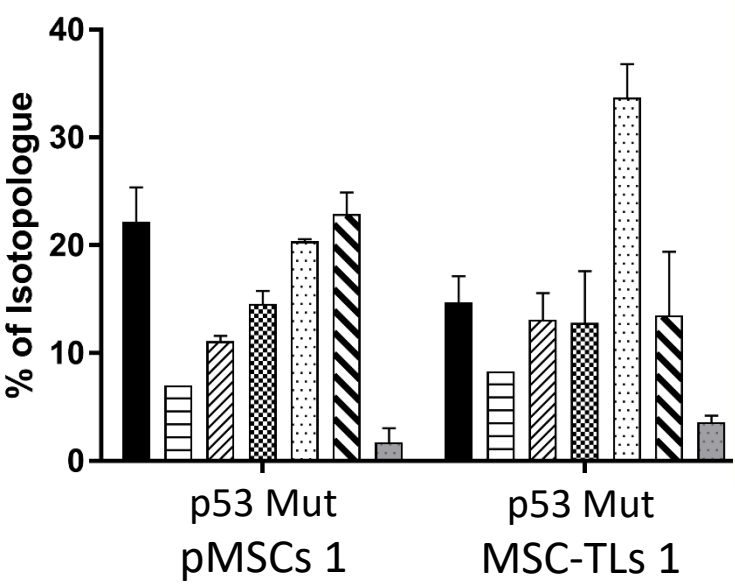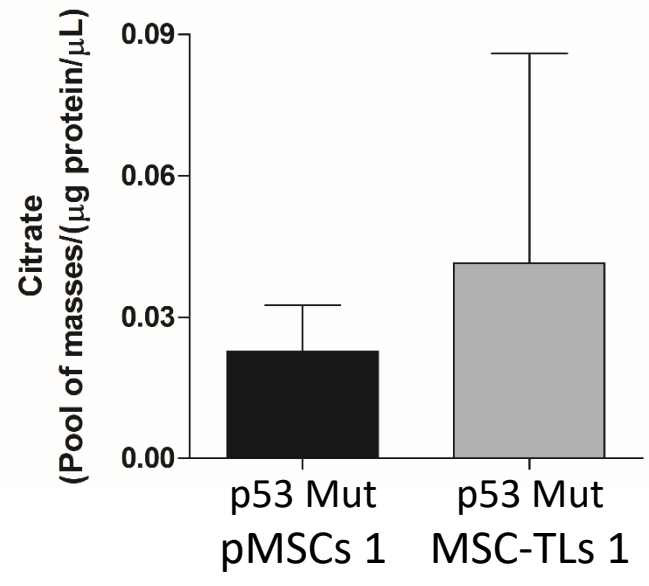

**Figure S2**

**C**

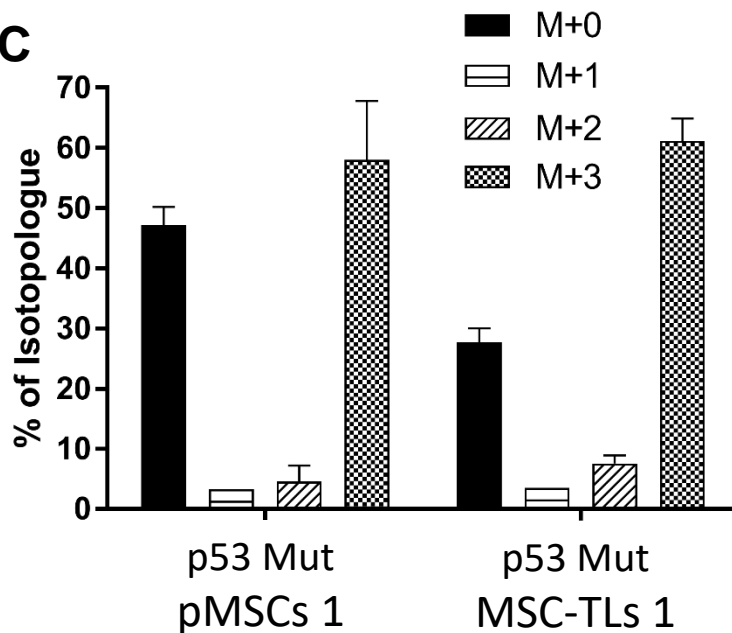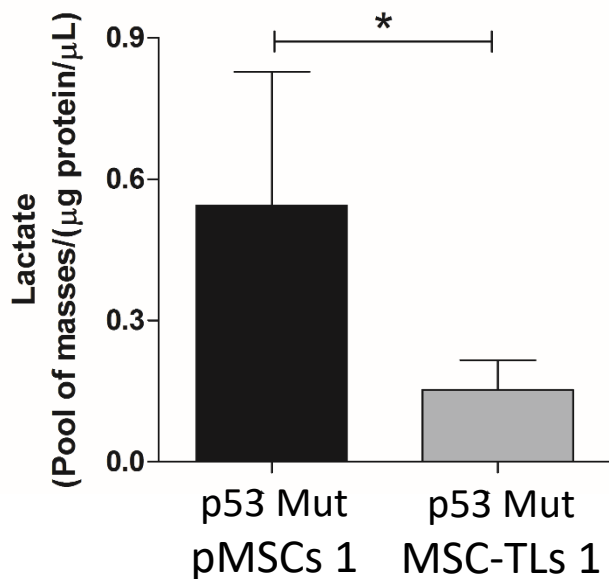

**D**

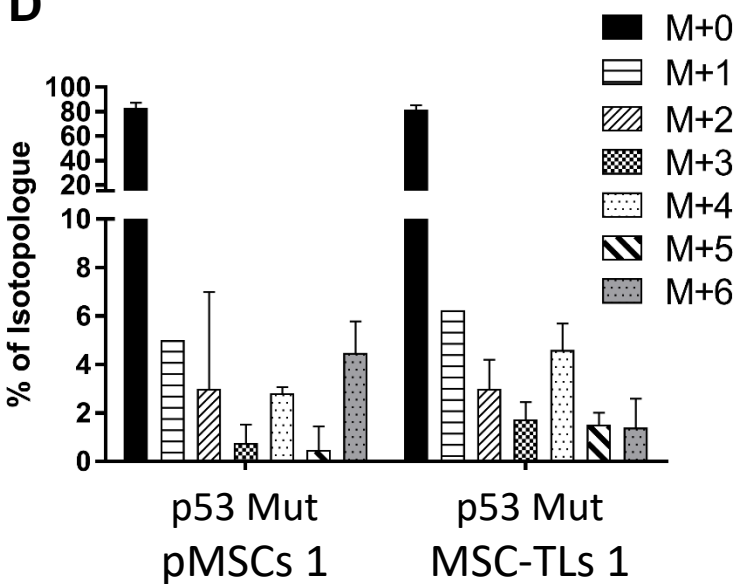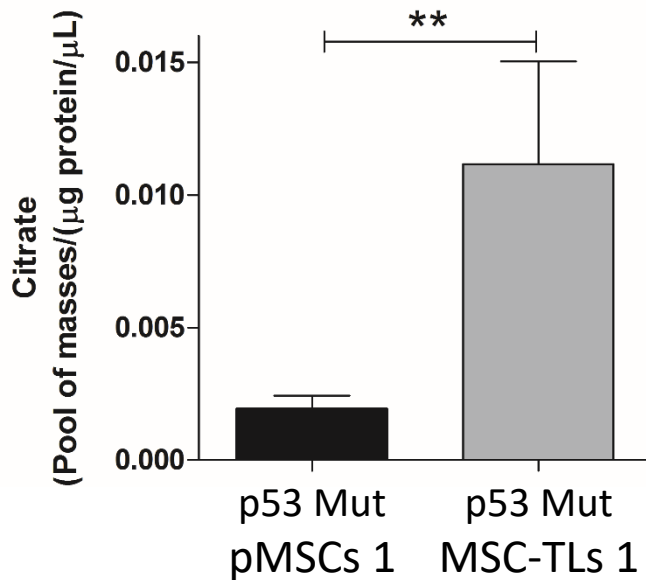

**Figure S2**

**E**

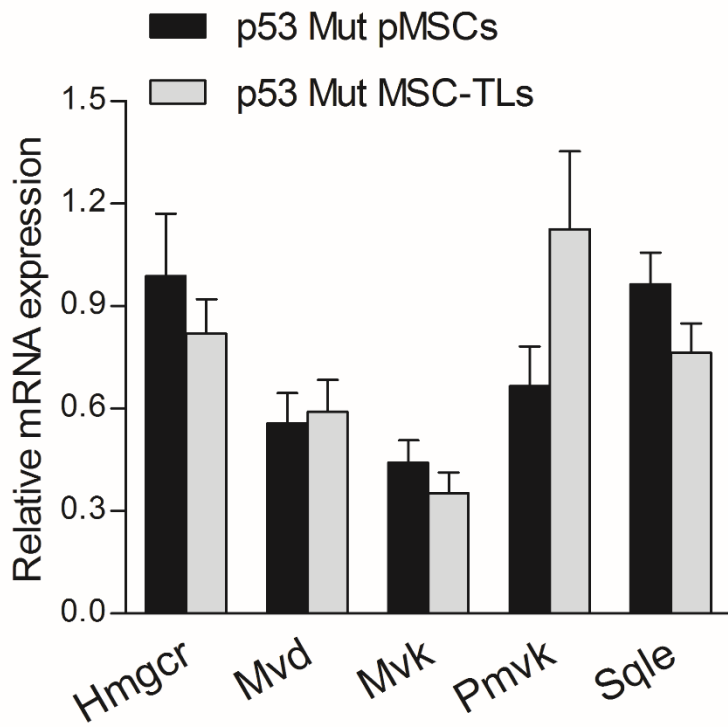

# Figure S4

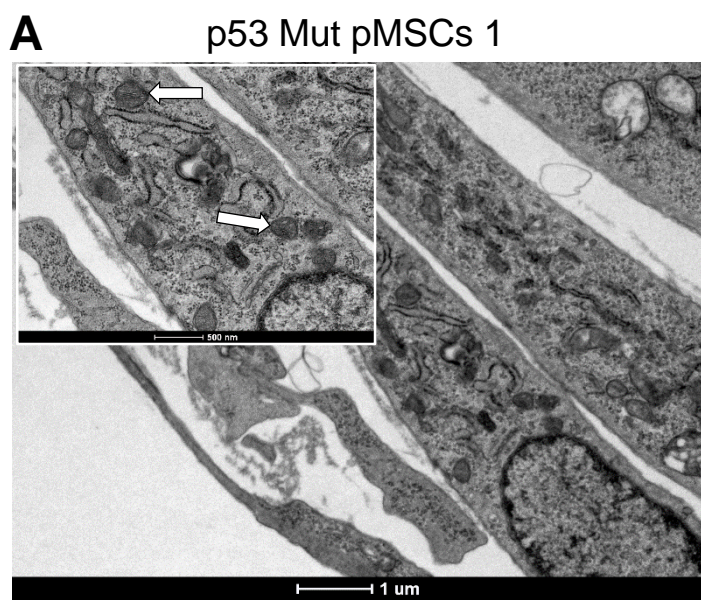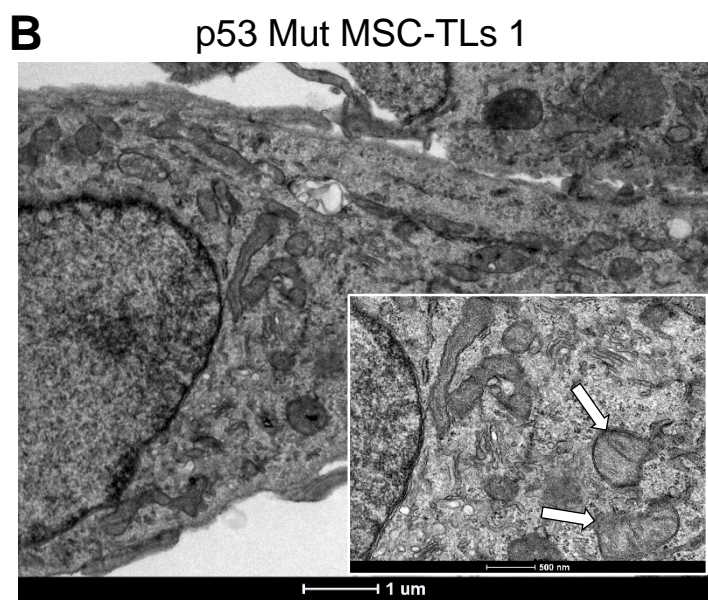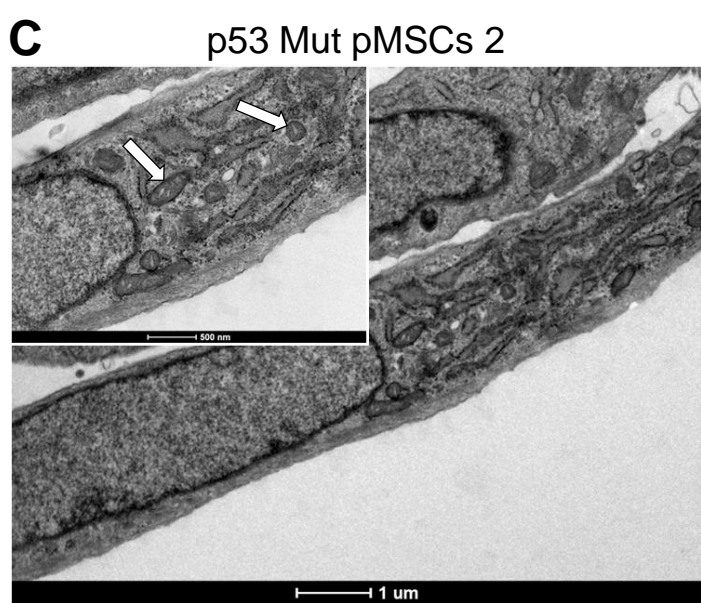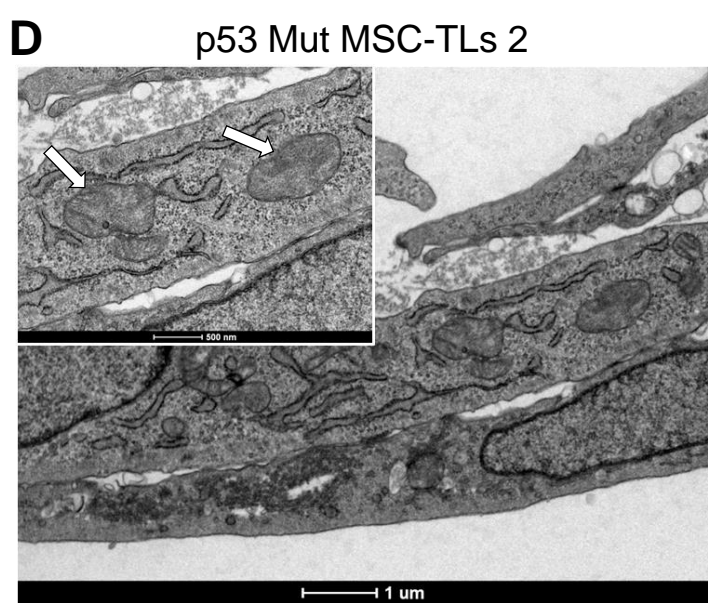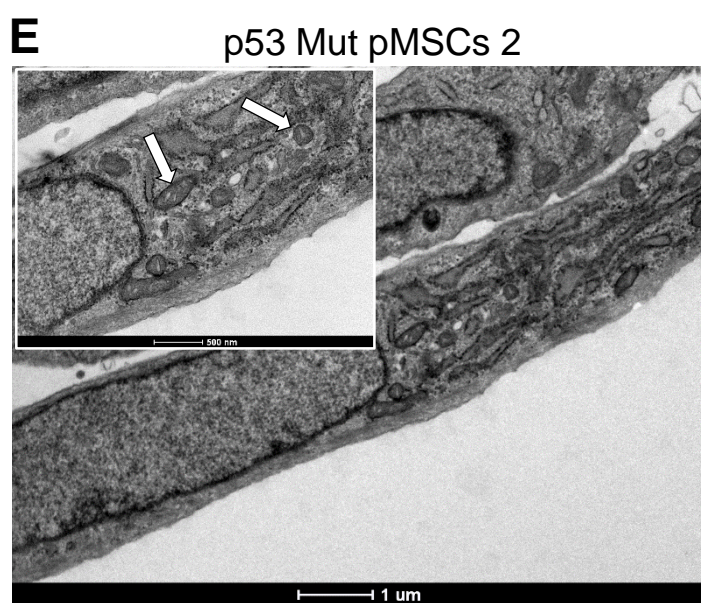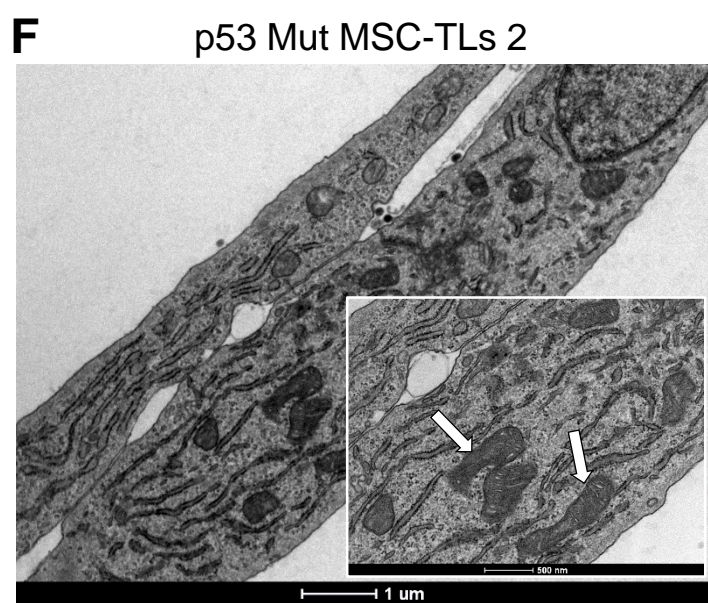

# Figure S4

## G

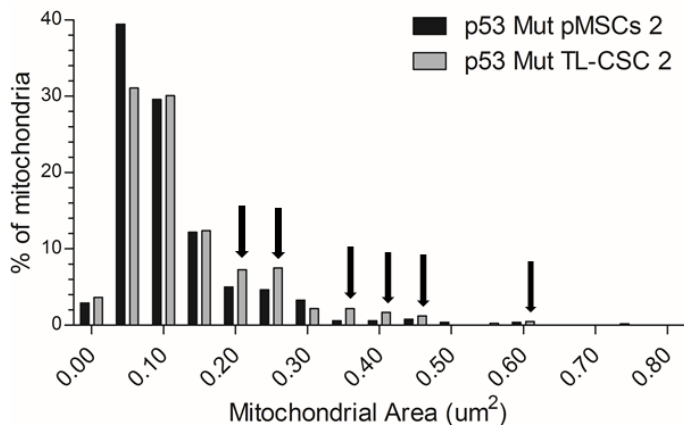

## H

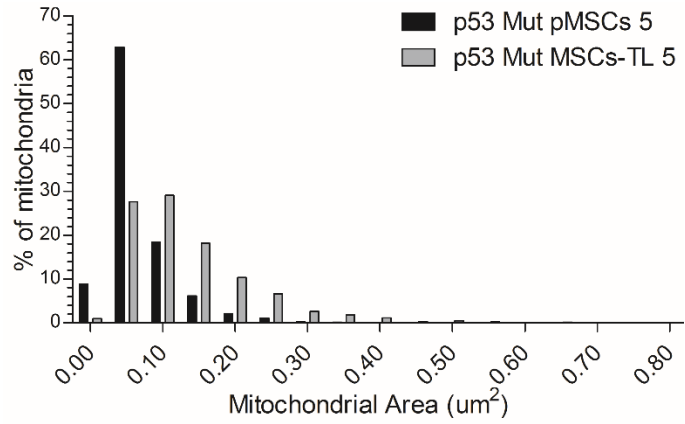

## I

p53 Mut pMSCs 5

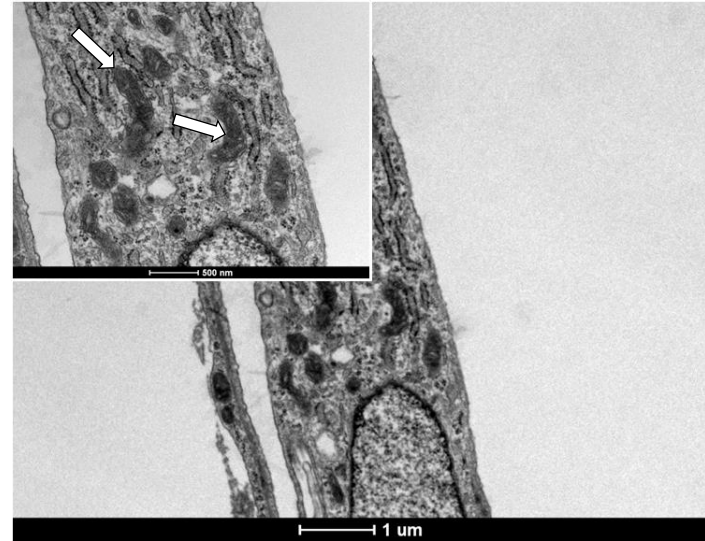

## J

p53 Mut MSC-TLs 5

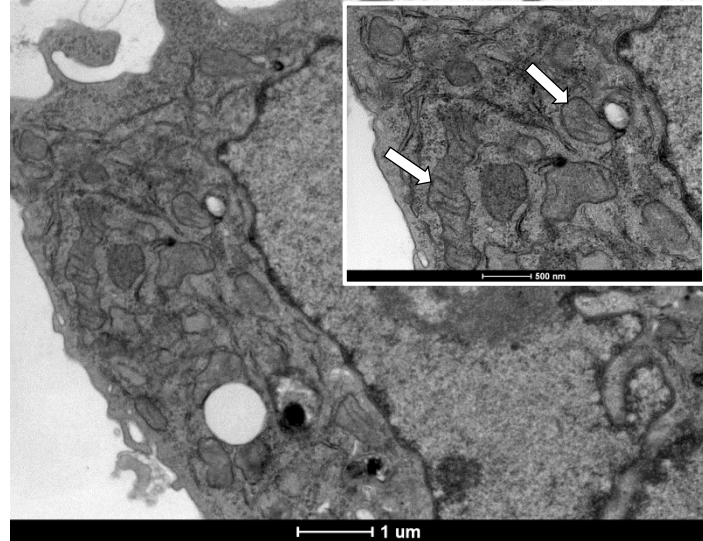

## K

p53 Mut pMSCs 5

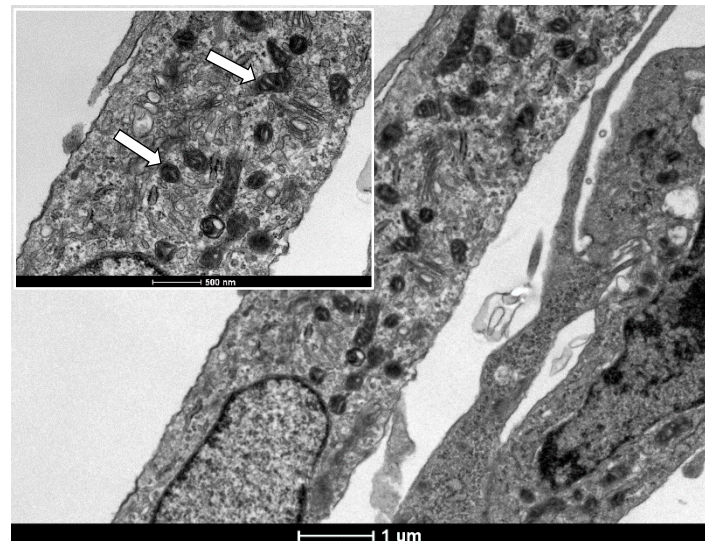

## L

p53 Mut MSC-TLs 5

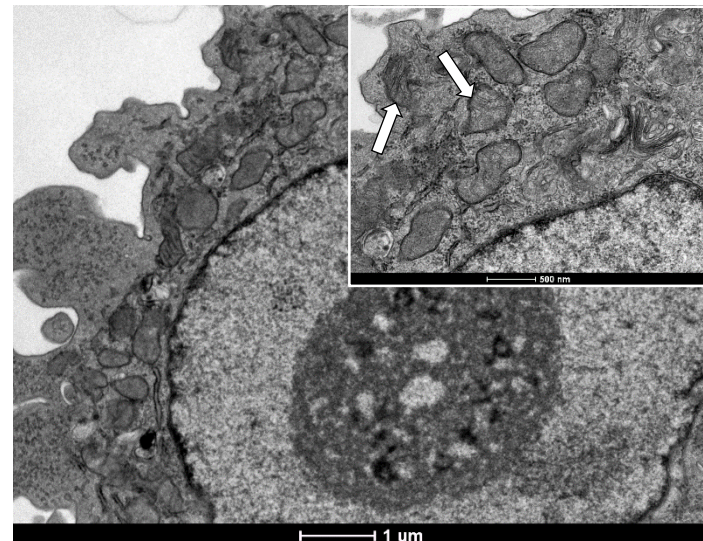



**Figure S5**

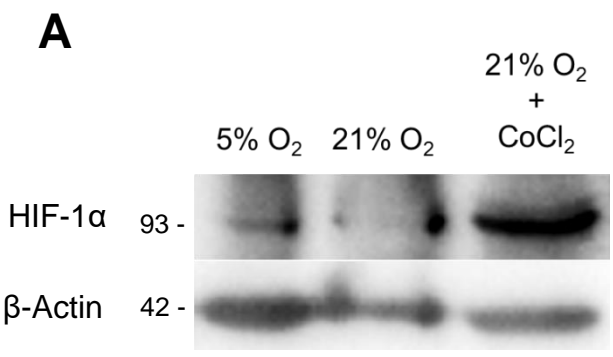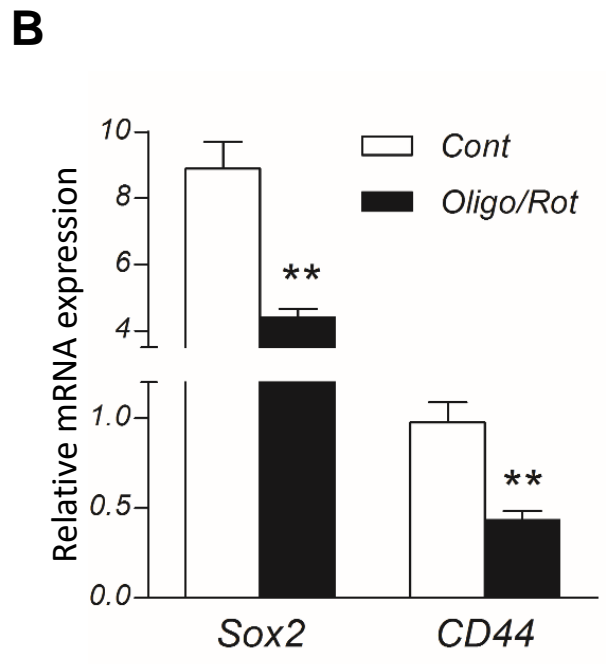

**Figure S6**

**A**

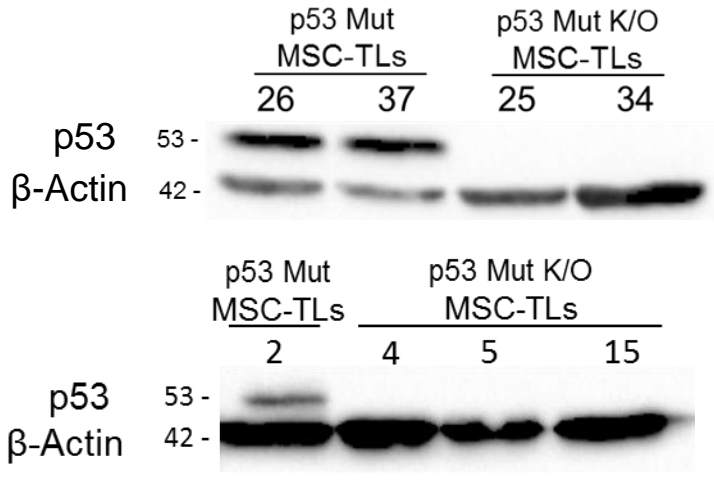

**B**

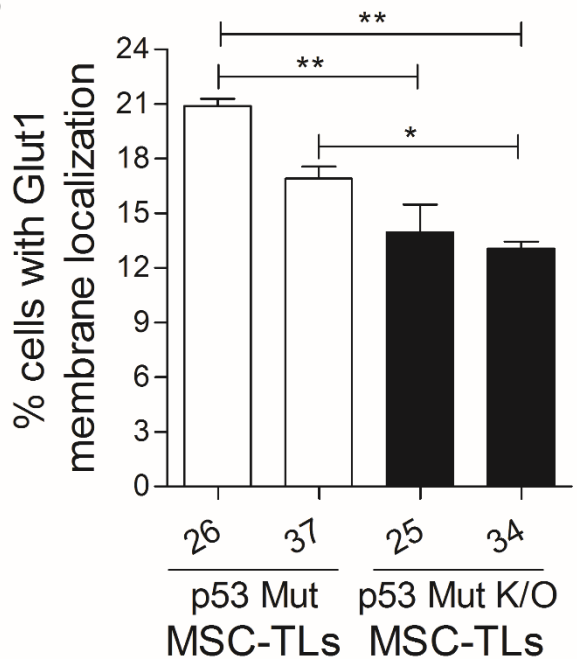

**C**

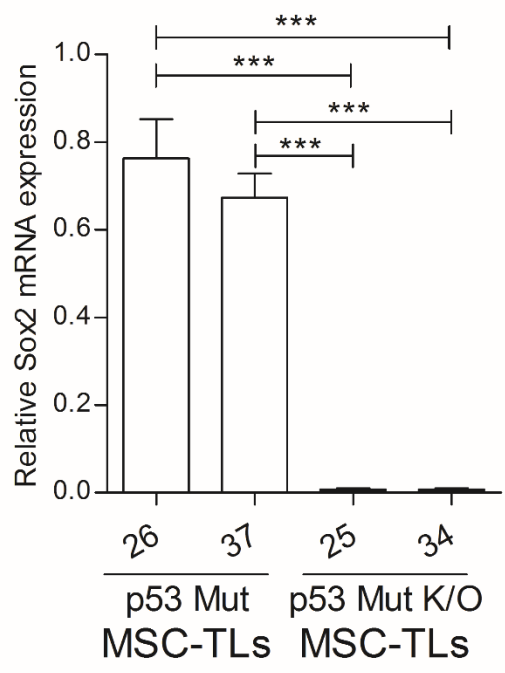

D

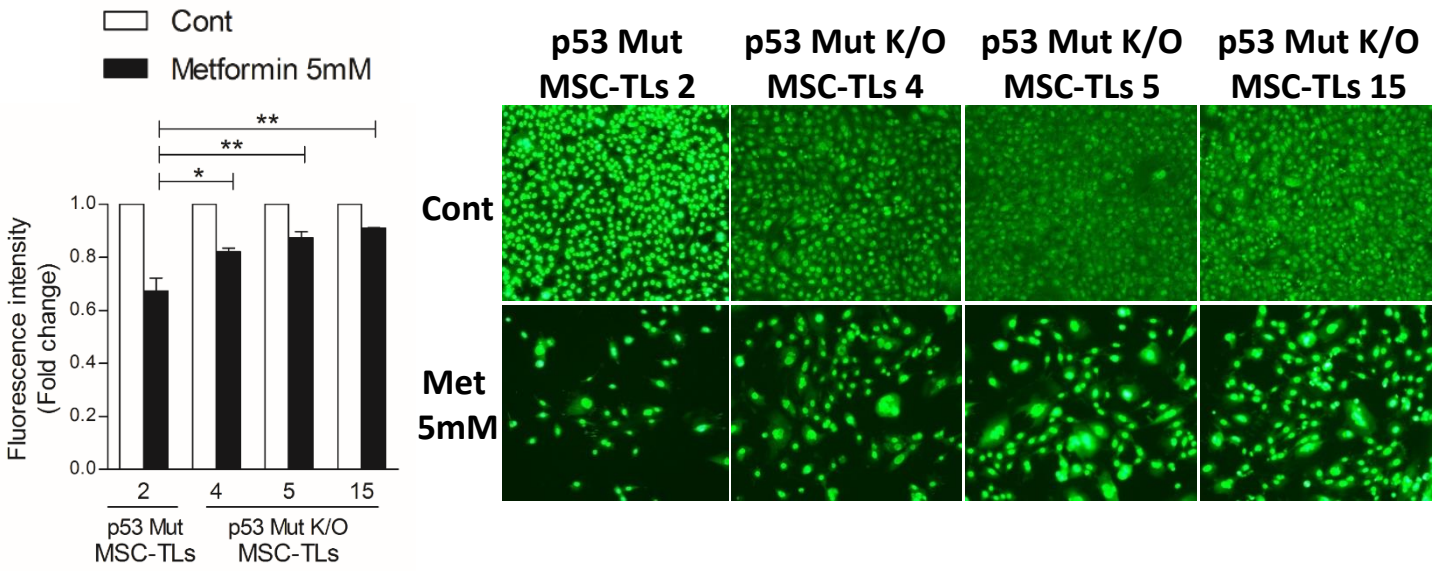

E

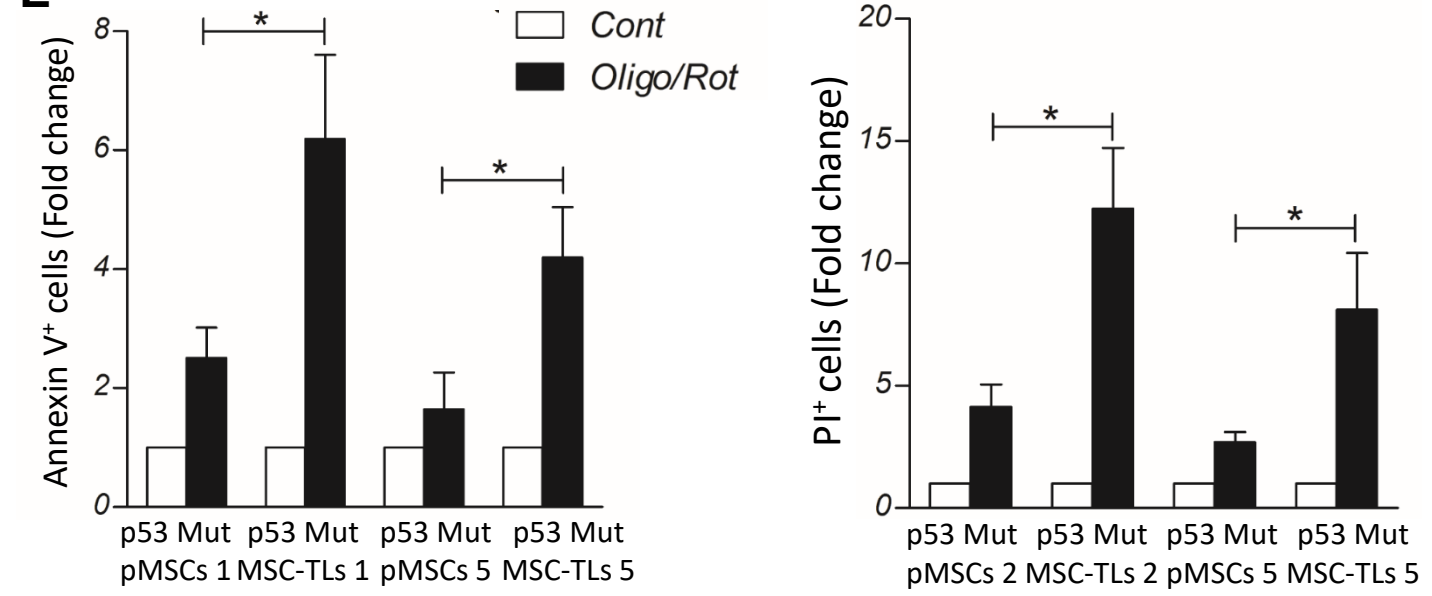

F

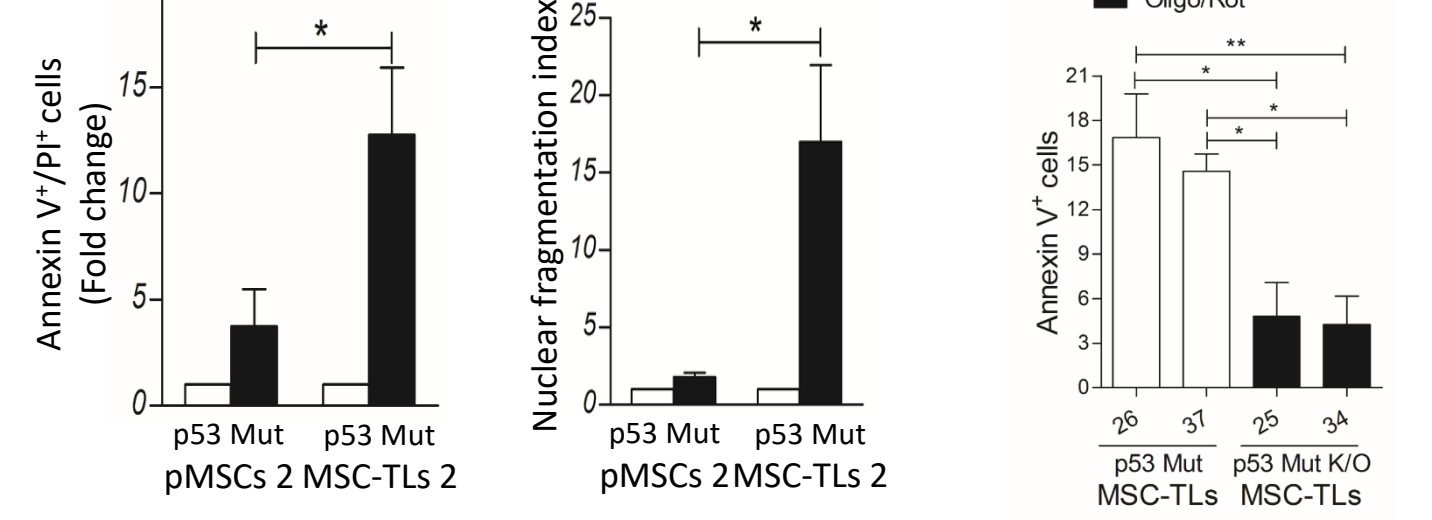

F

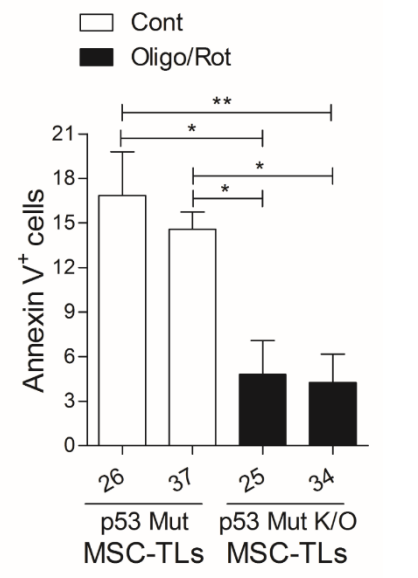

Supplement: 41418_2018_227_MOESM1_ESM.pdf [file 41418_2018_227_MOESM1_ESM.pdf]
