# Supplementary material for: Mutant p53-dependent mitochondrial metabolic alterations in a mesenchymal stem cell-based model of progressive malignancy
Source: PubMed Central journal article supplement (PMC6748146; doi:10.1038/s41418-018-0227-z), 2018-11-09
Supplement: 41418_2018_227_MOESM3_ESM.pdf [file 41418_2018_227_MOESM3_ESM.pdf]

| NAME                                                         | GS<br> foll GS DETAILS SIZE |     |
|--------------------------------------------------------------|-----------------------------|-----|
| PID_DNA_PK_PATHWAY                                           | PID_DNA_f Details ...       | 16  |
| HOWLIN_CITED1_TARGETS_2_DN                                   | HOWLIN_C Details ...        | 16  |
| COLLIS_PRKDC_REGULATORS                                      | COLLIS_PRI Details ...      | 15  |
| HEDENFALK_BREAST_CANCER_BRACX_DN                             | HEDENFALI Details ...       | 20  |
| FERRANDO_TAL1_NEIGHBORS                                      | FERRANDO Details ...        | 18  |
| LIN_MELANOMA_COPY_NUMBER_UP                                  | LIN_MELAN Details ...       | 65  |
| PARK_TRETINOIN_RESPONSE_AND_PML_RARA_FUSION                  | PARK_TRET1 Details ...      | 29  |
| PID_EPHA2_FWD_PATHWAY                                        | PID_EPHA2 Details ...       | 18  |
| REACTOME_CITRIC_ACID_CYCLE_TCA_CYCLE                         | REACTOME Details ...        | 18  |
| LAMB_CCND1_TARGETS                                           | LAMB_CCN Details ...        | 19  |
| WALLACE_PROSTATE_CANCER_UP                                   | WALLACE_ Details ...        | 19  |
| CHIARADONNA_NEOPLASTIC_TRANSFORMATION_KRAS_CDC25_L           | CHIARADOI Details ...       | 49  |
| CHEN_PDGF_TARGETS                                            | CHEN_PDG Details ...        | 18  |
| PEDERSEN_METASTASIS_BY_ERBB2_ISOFORM_1                       | PEDERSEN_ Details ...       | 45  |
| KUNINGER_IGF1_VS_PDGF_TARGETS_DN                             | KUNINGER_ Details ...       | 43  |
| KOHOUTEK_CCNT1_TARGETS                                       | KOHOUTEK Details ...        | 45  |
| DELACROIX_RAR_TARGETS_UP                                     | DELACROIX Details ...       | 45  |
| TONKS_TARGETS_OF_RUNX1_RUNX1T1_FUSION_SUSTAINED_IN_TONKS_TAI | TONKS_TAI Details ...       | 21  |
| BARRIER_CANCER_RELAPSE_TUMOR_SAMPLE_UP                       | BARRIER_C Details ...       | 15  |
| FIRESTEIN_CTNNB1_PATHWAY                                     | FIRESTEIN_ Details ...      | 30  |
| CHENG_RESPONSE_TO_NICKEL_ACETATE                             | CHENG_RESPONSE_TC           | 39  |
| LANDIS_ERBB2_BREAST_PRENEOPLASTIC_UP                         | LANDIS_ERBB2_BREAS          | 17  |
| CHEOK_RESPONSE_TO_MERCAPTOPYRINE_DN                          | CHEOK_RESPONSE_TO           | 18  |
| WARTERS_IR_RESPONSE_5GY                                      | WARTERS_IR_RESPON:          | 37  |
| DOANE_BREAST_CANCER_CLASSES_DN                               | DOANE_BREAST_CANC           | 32  |
| MARCINIAK_ER_STRESS_RESPONSE_VIA_CHOP                        | MARCINIAK_ER_STRES          | 23  |
| GARGALOVIC_RESPONSE_TO_OXIDIZED_PHOSPHOLIPIDS_BLUE_L         | GARGALOVIC_RESPON           | 111 |
| SAGIV_CD24_TARGETS_DN                                        | SAGIV_CD24_TARGETS          | 42  |
| COLLIS_PRKDC_SUBSTRATES                                      | COLLIS_PRKDC_SUBST          | 19  |
| CAIRO_HEPATOBLASTOMA_POOR_SURVIVAL                           | CAIRO_HEPATOBLASTO          | 16  |
| STONER_ESOPHAGEAL_CARCINOGENESIS_UP                          | STONER_ESOPHAGEAL           | 34  |
| BIOCARTA_MITOCHONDRIA_PATHWAY                                | BIOCARTA_MITOCHON           | 21  |
| MEISSNER_BRAIN_HCP_WITH_H3K4ME2                              | MEISSNER_BRAIN_HCF          | 16  |
| SHIN_B_CELL_LYMPHOMA_CLUSTER_5                               | SHIN_B_CELL_LYMPHC          | 17  |
| KEGG_DRUG_METABOLISM_OTHER_ENZYMES                           | KEGG_DRUG_METABC            | 29  |
| NAGASHIMA_EGF_SIGNALING_UP                                   | NAGASHIMA_EGF_SIG           | 57  |
| WELCH_GATA1_TARGETS                                          | WELCH_GATA1_TARGI           | 19  |
| CHOW_RASSF1_TARGETS_UP                                       | CHOW_RASSF1_TARGI           | 24  |
| REACTOME_SYNTHESIS_OF_PA                                     | REACTOME_SYNTHESI:          | 27  |
| REACTOME_TELOMERE_MAINTENANCE                                | REACTOME_TELOMER            | 62  |
| MUELLER_COMMON_TARGETS_OF_AML_FUSIONS_DN                     | MUELLER_COMMON_             | 29  |
| NADERI_BREAST_CANCER_PROGNOSIS_UP                            | NADERI_BREAST_CANC          | 47  |
| CHEN_HOXA5_TARGETS_9HR_UP                                    | CHEN_HOXA5_TARGET           | 183 |
| WHITFIELD_CELL_CYCLE_G1_S                                    | WHITFIELD_CELL_CYCL         | 122 |
| MOOTHA_TCA                                                   | MOOTHA_TCA                  | 15  |
| FIGUEROA_AML_METHYLATION_CLUSTER_2_UP                        | FIGUEROA_AML_METH           | 43  |
| GARGALOVIC_RESPONSE_TO_OXIDIZED_PHOSPHOLIPIDS_RED_UI         | GARGALOVIC_RESPON           | 17  |
| WANG_RESPONSE_TO_BEXAROTENE_UP                               | WANG_RESPONSE_TO            | 30  |
| REACTOME_MITOCHONDRIAL_PROTEIN_IMPORT                        | REACTOME_MITOCHO            | 46  |

|                                                     |                     |     |
|-----------------------------------------------------|---------------------|-----|
| ST_TUMOR_NECROSIS_FACTOR_PATHWAY                    | ST_TUMOR_NECROSIS   | 29  |
| REACTOME_METABOLISM_OF_POLYAMINES                   | REACTOME_METABOL    | 15  |
| FAELT_B_CLL_WITH_VH3_21_DN                          | FAELT_B_CLL_WITH_V  | 45  |
| NIKOLSKY_BREAST_CANCER_22Q13_AMPLICON               | NIKOLSKY_BREAST_CA  | 15  |
| KEGG_ALPHA_LINOLENIC_ACID_METABOLISM                | KEGG_ALPHA_LINOLEN  | 18  |
| BIOCARTA_WNT_PATHWAY                                | BIOCARTA_WNT_PATH   | 26  |
| CHIARADONNA_NEOPLASTIC_TRANSFORMATION_KRAS_UP       | CHIARADONNA_NEOPI   | 120 |
| KEGG_LINOLEIC_ACID_METABOLISM                       | KEGG_LINOLEIC_ACID_ | 19  |
| NIKOLSKY_BREAST_CANCER_8Q23_Q24_AMPLICON            | NIKOLSKY_BREAST_CA  | 132 |
| REACTOME_PYRIMIDINE_METABOLISM                      | REACTOME_PYRIMIDI   | 24  |
| ZEMBUTSU_SENSITIVITY_TO_METHOTREXATE                | ZEMBUTSU_SENSITIVI  | 18  |
| PID_REELIN_PATHWAY                                  | PID_REELIN_PATHWAY  | 29  |
| GRAHAM_CML_QUIESCENT_VS_CML_DIVIDING_UP             | GRAHAM_CML_QUIES    | 22  |
| YANG_BREAST_CANCER_ESR1_LASER_DN                    | YANG_BREAST_CANCE   | 47  |
| SHAFFER_IRF4_TARGETS_IN_ACTIVATED_B_LYMPHOCYTE      | SHAFFER_IRF4_TARGET | 74  |
| LEE_METASTASIS_AND_ALTERNATIVE_SPLICING_DN          | LEE_METASTASIS_AND  | 44  |
| TURASHVILI_BREAST_NORMAL_DUCTAL_VS_LOBULAR_UP       | TURASHVILI_BREAST_I | 57  |
| KEGG_ALANINE_ASPARTATE_AND_Glutamate_METABOLISM     | KEGG_ALANINE_ASPAI  | 31  |
| FISCHER_G1_S_CELL_CYCLE                             | FISCHER_G1_S_CELL_C | 185 |
| BASSO_CD40_SIGNALING_DN                             | BASSO_CD40_SIGNALI  | 61  |
| REACTOME_ACYL_CHAIN_REMODELLING_OF_PG               | REACTOME_ACYL_CHA   | 16  |
| ACEVEDO_FGFR1_TARGETS_IN_PROSTATE_CANCER_MODEL_UP   | ACEVEDO_FGFR1_TAR   | 265 |
| DUTTA_APOPTOSIS_VIA_NFKB                            | DUTTA_APOPTOSIS_VI  | 28  |
| REACTOME_EXTENSION_OF_TELOMERES                     | REACTOME_EXTENSION  | 27  |
| CHANDRAN_METASTASIS_TOP50_UP                        | CHANDRAN_METASTA    | 33  |
| KEGG_MISMATCH_REPAIR                                | KEGG_MISMATCH_REP   | 22  |
| SWEET_KRAS_TARGETS_DN                               | SWEET_KRAS_TARGET   | 57  |
| PID_P73PATHWAY                                      | PID_P73PATHWAY      | 71  |
| LIANG_HEMATOPOIESIS_STEM_CELL_NUMBER_LARGE_VS_TINY_ | LIANG_HEMATOPOIES   | 43  |
| PID_ARF6_PATHWAY                                    | PID_ARF6_PATHWAY    | 33  |
| REACTOME_DNA_STRAND_ELONGATION                      | REACTOME_DNA_STRAN  | 30  |
| REACTOME_ACYL_CHAIN_REMODELLING_OF_PE               | REACTOME_ACYL_CHA   | 21  |
| BIOCARTA_G2_PATHWAY                                 | BIOCARTA_G2_PATHWA  | 23  |
| OUYANG_PROSTATE_CANCER_MARKERS                      | OUYANG_PROSTATE_C   | 19  |
| MARIADASON_RESPONSE_TO_CURCUMIN_SULINDAC_7          | MARIADASON_RESPON   | 15  |
| NIKOLSKY_BREAST_CANCER_1Q21_AMPLICON                | NIKOLSKY_BREAST_CA  | 36  |
| MARSHALL_VIRAL_INFECTION_RESPONSE_DN                | MARSHALL_VIRAL_INF  | 29  |
| OKAWA_NEUROBLASTOMA_1P36_31_DELETION                | OKAWA_NEUROBLAST    | 22  |
| KEGG_DNA_REPLICATION                                | KEGG_DNA_REPLICATI  | 35  |
| KEGG_HOMOLOGOUS_RECOMBINATION                       | KEGG_HOMOLOGOUS_    | 27  |
| REACTOME_ACYL_CHAIN_REMODELLING_OF_PS               | REACTOME_ACYL_CHA   | 15  |
| WHITE_NEUROBLASTOMA_WITH_1P36.3_DELETION            | WHITE_NEUROBLASTC   | 20  |
| RICKMAN_TUMOR_DIFFERENTIATED_WELL_VS_MODERATELY_DI  | RICKMAN_TUMOR_DII   | 102 |
| REACTOME_HIV_LIFE_CYCLE                             | REACTOME_HIV_LIFE_  | 105 |
| SESTO_RESPONSE_TO_UV_C1                             | SESTO_RESPONSE_TO_  | 64  |
| HAHTOLA_CTCL_CUTANEOUS                              | HAHTOLA_CTCL_CUTA   | 22  |
| MARZEC_IL2_SIGNALING_UP                             | MARZEC_IL2_SIGNALIN | 110 |
| PID_HIV_NEF_PATHWAY                                 | PID_HIV_NEF_PATHWA  | 34  |
| AMIT_EGF_RESPONSE_120_MCF10A                        | AMIT_EGF_RESPONSE_  | 41  |
| KOBAYASHI_EGFR_SIGNALING_24HR_DN                    | KOBAYASHI_EGFR_SIG  | 239 |

|                                                     |                     |     |
|-----------------------------------------------------|---------------------|-----|
| WONG_IFNA2_RESISTANCE_UP                            | WONG_IFNA2_RESIST/  | 16  |
| REACTOME_METABOLISM_OF_VITAMINS_AND_COFACTORS       | REACTOME_METABOL    | 49  |
| REACTOME_ACTIVATION_OF_THE_PRE_REPLICATIVE_COMPLEX  | REACTOME_ACTIVATIC  | 29  |
| REACTOME_SYNTHESIS_OF_PC                            | REACTOME_SYNTHESI   | 18  |
| BIOCARTA_ACH_PATHWAY                                | BIOCARTA_ACH_PATH   | 15  |
| KAUFFMANN_DNA_REPAIR_GENES                          | KAUFFMANN_DNA_RE    | 216 |
| WHITFIELD_CELL_CYCLE_S                              | WHITFIELD_CELL_CYCL | 137 |
| BEIER_GLIOMA_STEM_CELL_UP                           | BEIER_GLIOMA_STEM_  | 33  |
| DAZARD_UV_RESPONSE_CLUSTER_G24                      | DAZARD_UV_RESPONS   | 22  |
| SONG_TARGETS_OF_IE86_CMV_PROTEIN                    | SONG_TARGETS_OF_IE  | 58  |
| HOFFMANN_PRE_BI_TO_LARGE_PRE_BII_LYMPHOCYTE_UP      | HOFFMANN_PRE_BI_T   | 34  |
| REACTOME_CTNNB1_PHOSPHORYLATION_CASCADE             | REACTOME_CTNNB1_I   | 15  |
| SANSOM_APC_TARGETS_UP                               | SANSOM_APC_TARGET   | 117 |
| CHEOK_RESPONSE_TO_MERCAPTOPYRINE_AND_HD_MTX_DN      | CHEOK_RESPONSE_TO   | 21  |
| REACTOME_INTERACTIONS_OF_VPR_WITH_HOST_CELLULAR_PRO | REACTOME_INTERACT   | 31  |
| GARGALOVIC_RESPONSE_TO_OXIDIZED_PHOSPHOLIPIDS_GREEN | GARGALOVIC_RESPON   | 22  |
| DAZARD_RESPONSE_TO_UV_SCC_DN                        | DAZARD_RESPONSE_T   | 113 |
| KEGG_ETHER_LIPID_METABOLISM                         | KEGG_ETHER_LIPID_M  | 32  |
| GARGALOVIC_RESPONSE_TO_OXIDIZED_PHOSPHOLIPIDS_BLACK | GARGALOVIC_RESPON   | 31  |
| DUTERTRE ESTRADIOL_RESPONSE_6HR_UP                  | DUTERTRE ESTRADIOL  | 216 |
| REN_BOUND_BY_E2F                                    | REN_BOUND_BY_E2F    | 58  |
| REACTOME_TRANSCRIPTIONAL_ACTIVITY_OF_SMAD2_SMAD3_SI | REACTOME_TRANSCRI   | 36  |
| PID_ERBB_NETWORK_PATHWAY                            | PID_ERBB_NETWORK_   | 15  |
| REACTOME_CYTOSOLIC_TRNA_AMINOACYLATION              | REACTOME_CYTOSOLI   | 24  |
| KOKKINAKIS METHIONINE_DEPRIVATION_96HR_DN           | KOKKINAKIS METHION  | 75  |
| GENTILE_UV_RESPONSE_CLUSTER_D1                      | GENTILE_UV_RESPONS  | 16  |
| REACTOME_DESTABILIZATION_OF_MRNA_BY_KSRP            | REACTOME_DESTABILI  | 17  |
| BILANGES RAPAMYCIN_SENSITIVE_GENES                  | BILANGES RAPAMYCIN  | 37  |
| KORKOLA_CORRELATED_WITH_POU5F1                      | KORKOLA_CORRELATE   | 27  |
| BRACHAT_RESPONSE_TO_METHOTREXATE_UP                 | BRACHAT_RESPONSE_   | 21  |
| BROWNE_HCMV_INFECTION_16HR_UP                       | BROWNE_HCMV_INFE    | 207 |
| DE_YY1_TARGETS_UP                                   | DE_YY1_TARGETS_UP   | 19  |
| WANG_RECURRENT_LIVER_CANCER_UP                      | WANG_RECURRENT_L    | 19  |
| KAUFFMANN_MELANOMA_RELAPSE_UP                       | KAUFFMANN_MELANC    | 58  |
| DING_LUNG_CANCER_EXPRESSION_BY_COPY_NUMBER          | DING_LUNG_CANCER_   | 95  |
| SCHRAMM_INHBA_TARGETS_DN                            | SCHRAMM_INHBA_TA    | 24  |
| PUJANA_BRCA_CENTERED_NETWORK                        | PUJANA_BRCA_CENTE   | 114 |
| BIOCARTA_STRESS_PATHWAY                             | BIOCARTA_STRESS_PA  | 25  |
| DORN_ADENOVIRUS_INFECTION_32HR_DN                   | DORN_ADENOVIRUS_I   | 38  |
| BRUINS_UVC_RESPONSE_MIDDLE                          | BRUINS_UVC_RESPON   | 84  |
| WANG_RESPONSE_TO_GSK3_INHIBITOR_SB216763_DN         | WANG_RESPONSE_TO    | 334 |
| LANDIS_BREAST_CANCER_PROGRESSION_UP                 | LANDIS_BREAST_CANC  | 42  |
| REACTOME_LAGGING_STRAND_SYNTHESIS                   | REACTOME_LAGGING_   | 19  |
| KEGG_CITRATE_CYCLE_TCA_CYCLE                        | KEGG_CITRATE_CYCLE  | 28  |
| BURTON_ADIPOGENESIS_PEAK_AT_8HR                     | BURTON_ADIPOGENES   | 38  |
| REACTOME_MEIOTIC_RECOMBINATION                      | REACTOME_MEIOTIC_   | 66  |
| ROYLANCE_BREAST_CANCER_16Q_COPY_NUMBER_DN           | ROYLANCE_BREAST_C/  | 22  |
| PID_NFKAPPAB_ATYPICAL_PATHWAY                       | PID_NFKAPPAB_ATYPI  | 17  |
| PUIFFE_INVASION_INHIBITED_BY_ASCITES_DN             | PUIFFE_INVASION_INF | 133 |
| BOSCO_EPITHELIAL_DIFFERENTIATION_MODULE             | BOSCO_EPITHELIAL_DI | 53  |

|                                                      |                     |     |
|------------------------------------------------------|---------------------|-----|
| TUOMISTO_TUMOR_SUPPRESSION_BY_COL13A1_DN             | TUOMISTO_TUMOR_S    | 17  |
| ROESSLER_LIVER_CANCER_METASTASIS_DN                  | ROESSLER_LIVER_CAN  | 44  |
| REACTOME_PROCESSIVE_SYNTHESIS_ON_THE_LAGGING_STRAND  | REACTOME_PROCESSI'  | 15  |
| REACTOME_ACTIVATION_OF_ATR_IN_RESPONSE_TO_REPLICATIO | REACTOME_ACTIVATIO  | 35  |
| BIOCARTA_ATM_PATHWAY                                 | BIOCARTA_ATM_PATH   | 18  |
| BIOCARTA_CHEMICAL_PATHWAY                            | BIOCARTA_CHEMICAL_  | 21  |
| KOBAYASHI_EGFR_SIGNALING_6HR_DN                      | KOBAYASHI_EGFR_SIG  | 18  |
| REACTOME_G1_S_SPECIFIC_TRANSCRIPTION                 | REACTOME_G1_S_SPE   | 17  |
| REACTOME_MAP_KINASE_ACTIVATION_IN_TLR_CASCADE        | REACTOME_MAP_KIN,   | 49  |
| HOFMANN_MYELODYSPLASTIC_SYNDROM_RISK_UP              | HOFMANN_MYELODY!    | 23  |
| RHEIN_ALL_GLUCOCORTICOID_THERAPY_UP                  | RHEIN_ALL_GLUCOCO   | 69  |
| REACTOME_PACKAGING_OF_TELOMERE_ENDS                  | REACTOME_PACKAGIN   | 35  |
| BIOCARTA_ETS_PATHWAY                                 | BIOCARTA_ETS_PATHV  | 17  |
| ROESSLER_LIVER_CANCER_METASTASIS_UP                  | ROESSLER_LIVER_CAN  | 99  |
| ZHENG_FOXP3_TARGETS_UP                               | ZHENG_FOXP3_TARGE   | 25  |
| DURCHDEWALD_SKIN_CARCINOGENESIS_DN                   | DURCHDEWALD_SKIN_   | 246 |
| SU_THYMUS                                            | SU_THYMUS           | 17  |
| REACTOME_G2_M_CHECKPOINTS                            | REACTOME_G2_M_CH    | 41  |
| MORI_MATURE_B_LYMPHOCYTE_DN                          | MORI_MATURE_B_LYM   | 72  |
| PARENT_MTOR_SIGNALING_DN                             | PARENT_MTOR_SIGNA   | 41  |
| MAHADEVAN_RESPONSE_TO_MP470_DN                       | MAHADEVAN_RESPON    | 18  |
| GALINDO_IMMUNE_RESPONSE_TO_ENTEROTOXIN               | GALINDO_IMMUNE_R    | 79  |
| REACTOME_DOUBLE_STRAND_BREAK_REPAIR                  | REACTOME_DOUBLE_!   | 21  |
| REACTOME_AMINE_DERIVED_HORMONES                      | REACTOME_AMINE_D    | 15  |
| DORN_ADENOVIRUS_INFECTION_24HR_DN                    | DORN_ADENOVIRUS_I   | 42  |
| DAIRKEE_CANCER_PRONE_RESPONSE_BPA                    | DAIRKEE_CANCER_PRC  | 49  |
| REACTOME_JNK_C_JUN_KINASES_PHOSPHORYLATION_AND_ACT   | REACTOME_JNK_C_JU   | 16  |
| LE_NEURONAL_DIFFERENTIATION_DN                       | LE_NEURONAL_DIFFEF  | 19  |
| PUJANA_XPRSS_INT_NETWORK                             | PUJANA_XPRSS_INT_N  | 157 |
| REACTOME_PLATELET_SENSITIZATION_BY_LDL               | REACTOME_PLATELET_  | 16  |
| MMS_MOUSE_LYMPH_HIGH_4HRS_UP                         | MMS_MOUSE_LYMPH     | 34  |
| REACTOME_FACTORS_INVOLVED_IN_MEGAKARYOCYTE_DEVELOI   | REACTOME_FACTORS_   | 110 |
| YAGI_AML_SURVIVAL                                    | YAGI_AML_SURVIVAL   | 121 |
| ZHANG_RESPONSE_TO_CANTHARIDIN_DN                     | ZHANG_RESPONSE_TC   | 65  |
| BURTON_ADIPOGENESIS_1                                | BURTON_ADIPOGENES   | 33  |
| WAKASUGI_HAVE_ZNF143_BINDING_SITES                   | WAKASUGI_HAVE_ZNF   | 57  |
| VECCHI_GASTRIC_CANCER_EARLY_UP                       | VECCHI_GASTRIC_CAN  | 387 |
| YANG_BREAST_CANCER_ESR1_BULK_DN                      | YANG_BREAST_CANCE   | 22  |
| REACTOME_TRNA_AMINOACYLATION                         | REACTOME_TRNA_AM    | 42  |
| PID_PI3KCI_AKT_PATHWAY                               | PID_PI3KCI_AKT_PATH | 35  |
| REACTOME_E2F_MEDIATED_REGULATION_OF_DNA_REPLICATIOI  | REACTOME_E2F_MEDI   | 32  |
| DIRMEIER_LMP1_RESPONSE_EARLY                         | DIRMEIER_LMP1_RESF  | 64  |
| KEGG_ONE_CARBON_POOL_BY_FOLATE                       | KEGG_ONE_CARBON_    | 17  |
| AGUIRRE_PANCREATIC_CANCER_COPY_NUMBER_DN             | AGUIRRE_PANCREATIC  | 220 |
| REACTOME_SMAD2_SMAD3_SMAD4_HETEROTRIMER_REGULAT      | REACTOME_SMAD2_S    | 25  |
| FINETTI_BREAST_CANCERS_KINOME_GRAY                   | FINETTI_BREAST_CANC | 15  |
| VIETOR_IFRD1_TARGETS                                 | VIETOR_IFRD1_TARGE  | 23  |
| SANSOM_APC_TARGETS                                   | SANSOM_APC_TARGE    | 190 |
| BIOCARTA_TNFR2_PATHWAY                               | BIOCARTA_TNFR2_PA   | 18  |
| SU_PANCREAS                                          | SU_PANCREAS         | 44  |

|                                                                |                     |     |
|----------------------------------------------------------------|---------------------|-----|
| OUILLETTE_CLL_13Q14_DELETION_UP                                | OUILLETTE_CLL_13Q14 | 60  |
| DELACROIX_RAR_BOUND_ES                                         | DELACROIX_RAR_BOU   | 419 |
| MATTHEWS_AP1_TARGETS                                           | MATTHEWS_AP1_TAR    | 16  |
| REACTOME_BASIGIN_INTERACTIONS                                  | REACTOME_BASIGIN_I  | 23  |
| REACTOME_DEPOSITION_OF_NEW_CENPA_CONTAINING_NUCLEI             | REACTOME_DEPOSITIO  | 51  |
| BENPORATH_PROLIFERATION                                        | BENPORATH_PROLIFE   | 136 |
| PID_FOXO_PATHWAY                                               | PID_FOXO_PATHWAY    | 48  |
| DORN_ADENOVIRUS_INFECTION_48HR_DN                              | DORN_ADENOVIRUS_I   | 39  |
| BURTON_ADIPOGENESIS_PEAK_AT_16HR                               | BURTON_ADIPOGENES   | 38  |
| STEIN_ESRRA_TARGETS_RESPONSIVE_TO_ESTROGEN_UP                  | STEIN_ESRRA_TARGET  | 24  |
| BOQUEST_STEM_CELL_DN                                           | BOQUEST_STEM_CELL   | 195 |
| MAGRANGEAS_MULTIPLE_MYELOMA_IGG_VS_IGA_DN                      | MAGRANGEAS_MULTI    | 22  |
| BROWNE_HCMV_INFECTION_18HR_UP                                  | BROWNE_HCMV_INFE    | 167 |
| REACTOME_RESOLUTION_OF_AP_SITES_VIA_THE_MULTIPLE_NUCLEI        | REACTOME_RESOLUTION | 17  |
| REACTOME_ENOS_ACTIVATION_AND_REGULATION                        | REACTOME_ENOS_AC    | 19  |
| AKL_HTLV1_INFECTION_UP                                         | AKL_HTLV1_INFECTION | 24  |
| PID_CMYB_PATHWAY                                               | PID_CMYB_PATHWAY    | 79  |
| WILLIAMS_ESR1_TARGETS_UP                                       | WILLIAMS_ESR1_TARC  | 25  |
| MUELLER_METHYLATED_IN_GLIOMASTOMA                              | MUELLER_METHYLATE   | 35  |
| AMIT_EGF_RESPONSE_120_HELA                                     | AMIT_EGF_RESPONSE   | 65  |
| REACTOME_METABOLISM_OF_NUCLEOTIDES                             | REACTOME_METABOL    | 69  |
| PYEON_HPV_POSITIVE_TUMORS_UP                                   | PYEON_HPV_POSITIVE  | 75  |
| BOYLAN_MULTIPLE_MYELOMA_C_CLUSTER_UP                           | BOYLAN_MULTIPLE_M   | 37  |
| BROCKE_APOPTOSIS_REVERSED_BY_IL6                               | BROCKE_APOPTOSIS_F  | 135 |
| DEN_INTERACT_WITH_LCA5                                         | DEN_INTERACT_WITH   | 26  |
| MUELLER_PLURINET                                               | MUELLER_PLURINET    | 284 |
| REACTOME_ACYL_CHAIN_REMODELLING_OF_PC                          | REACTOME_ACYL_CHA   | 22  |
| LI_WILMS_TUMOR_VS_FETAL_KIDNEY_1_DN                            | LI_WILMS_TUMOR_VS   | 156 |
| BROWNE_HCMV_INFECTION_48HR_UP                                  | BROWNE_HCMV_INFE    | 160 |
| NEMETH_INFLAMMATORY_RESPONSE_LPS_UP                            | NEMETH_INFLAMMAT    | 81  |
| BARIS_THYROID_CANCER_UP                                        | BARIS_THYROID_CANC  | 23  |
| MOOTHA_PGC                                                     | MOOTHA_PGC          | 390 |
| ZHANG_GATA6_TARGETS_DN                                         | ZHANG_GATA6_TARGI   | 62  |
| GENTILE_UV_HIGH_DOSE_UP                                        | GENTILE_UV_HIGH_DC  | 23  |
| BIOCARTA_DC_PATHWAY                                            | BIOCARTA_DC_PATHW   | 22  |
| REACTOME_TRANSPORT_OF_MATURE_MRNA_DERIVED_FROM_NUCLEI          | REACTOME_TRANSPOR   | 32  |
| SMIRNOV_RESPONSE_TO_IR_2HR_UP                                  | SMIRNOV_RESPONSE    | 47  |
| KEGG_GLYCEROPHOSPHOLIPID_METABOLISM                            | KEGG_GLYCEROPHOSF   | 75  |
| BONOME_OVARIAN_CANCER_POOR_SURVIVAL_DN                         | BONOME_OVARIAN_C    | 20  |
| MAHADEVAN_RESPONSE_TO_MP470_UP                                 | MAHADEVAN_RESPON    | 17  |
| IZADPANAH_STEM_CELL_ADIPOSE_VS_BONE_UP                         | IZADPANAH_STEM_CE   | 107 |
| PENG_GLUCOSE_DEPRIVATION_UP                                    | PENG_GLUCOSE_DEPR   | 42  |
| REACTOME_DOWNREGULATION_OF_SMAD2_3_SMAD4_TRANSCRIPTION_FACTORS | REACTOME_DOWNREGL   | 19  |
| BIOCARTA_CASPASE_PATHWAY                                       | BIOCARTA_CASPASE_F  | 22  |
| GAVIN_IL2_RESPONSIVE_FOXP3_TARGETS_UP                          | GAVIN_IL2_RESPONSI  | 17  |
| WALLACE_PROSTATE_CANCER_RACE_DN                                | WALLACE_PROSTATE    | 65  |
| CHANG_CYCLING_GENES                                            | CHANG_CYCLING_GEN   | 135 |
| TAYLOR_METHYLATED_IN_ACUTE_LYMPHOBLASTIC_LEUKEMIA              | TAYLOR_METHYLATED   | 71  |
| WARTERS_RESPONSE_TO_IR_SKIN                                    | WARTERS_RESPONSE    | 63  |
| TIAN_TNF_SIGNALING_NOT_VIA_NFKB                                | TIAN_TNF_SIGNALING  | 21  |

|                                                          |                     |     |
|----------------------------------------------------------|---------------------|-----|
| SHETH_LIVER_CANCER_VS_TXNIP_LOSS_PAM6                    | SHETH_LIVER_CANCER  | 44  |
| CREIGHTON_ENDOCRINE_THERAPY_RESISTANCE_2                 | CREIGHTON_ENDOCRI   | 337 |
| BILBAN_B_CLL_LPL_DN                                      | BILBAN_B_CLL_LPL_DN | 38  |
| YEGNASUBRAMANIAN_PROSTATE_CANCER                         | YEGNASUBRAMANIAN    | 107 |
| SWEET_KRAS_ONCOGENIC_SIGNATURE                           | SWEET_KRAS_ONCOGI   | 85  |
| BERENJENO_ROCK_SIGNALING_NOT_VIA_RHOA_UP                 | BERENJENO_ROCK_SIC  | 27  |
| VALK_AML_CLUSTER_7                                       | VALK_AML_CLUSTER_7  | 23  |
| REACTOME_LATE_PHASE_OF_HIV_LIFE_CYCLE                    | REACTOME_LATE_PHA   | 92  |
| ABRAMSON_INTERACT_WITH_AIRE                              | ABRAMSON_INTERACT   | 42  |
| REACTOME_NUCLEAR_EVENTS_KINASE_AND_TRANSCRIPTION_FACTORS | REACTOME_NUCLEAR_   | 24  |
| ISHIDA_E2F_TARGETS                                       | ISHIDA_E2F_TARGETS  | 51  |
| BIOCARTA_ATRBRCA_PATHWAY                                 | BIOCARTA_ATRBRCA_I  | 20  |
| SARRIO_EPITHELIAL_MESENCHYMAL_TRANSITION_UP              | SARRIO_EPITHELIAL_M | 164 |
| MARKS_HDAC_TARGETS_DN                                    | MARKS_HDAC_TARGETS  | 15  |
| MATTHEWS_SKIN_CARCINOGENESIS_VIA_JUN                     | MATTHEWS_SKIN_CAF   | 15  |
| REACTOME_SIGNALING_BY_TGF_BETA_RECEPTOR_COMPLEX          | REACTOME_SIGNALING  | 60  |
| KEGG_APOPTOSIS                                           | KEGG_APOPTOSIS      | 79  |
| BOYALT_LIVER_CANCER_SUBCLASS_G23_UP                      | BOYALT_LIVER_CANC   | 48  |
| CHICAS_RB1_TARGETS_SENESCENT                             | CHICAS_RB1_TARGETS  | 500 |
| REACTOME_RNA_POL_I_PROMOTER_OPENING                      | REACTOME_RNA_POL_   | 44  |
| BROWN_MYELOID_CELL_DEVELOPMENT_DN                        | BROWN_MYELOID_CE    | 117 |
| DORMOY_ELAVL1_TARGETS                                    | DORMOY_ELAVL1_TAF   | 16  |
| PUJANA_BRCA2_PCC_NETWORK                                 | PUJANA_BRCA2_PCC_   | 389 |
| PENG_GLUCOSE_DEPRIVATION_DN                              | PENG_GLUCOSE_DEPR   | 157 |
| RODRIGUES_NTN1_AND_DCC_TARGETS                           | RODRIGUES_NTN1_AN   | 31  |
| WU_HBX_TARGETS_2_UP                                      | WU_HBX_TARGETS_2_   | 22  |
| MURAKAMI_UV_RESPONSE_24HR                                | MURAKAMI_UV_RESP    | 18  |
| PYEON_CANCER_HEAD_AND_NECK_VS_CERVICAL_UP                | PYEON_CANCER_HEAD   | 166 |
| INGA_TP53_TARGETS                                        | INGA_TP53_TARGETS   | 15  |
| FARMER_BREAST_CANCER_CLUSTER_2                           | FARMER_BREAST_CAN   | 32  |
| REACTOME_ACTIVATION_OF_GENES_BY_ATF4                     | REACTOME_ACTIVATIC  | 24  |
| KIM_WT1_TARGETS_UP                                       | KIM_WT1_TARGETS_U   | 204 |
| ACOSTA_PROLIFERATION_INDEPENDENT_MYC_TARGETS_UP          | ACOSTA_PROLIFERATI  | 75  |
| ST_ERK1_ERK2_MAPK_PATHWAY                                | ST_ERK1_ERK2_MAPK   | 32  |
| REACTOME_NUCLEOTIDE_BINDING_DOMAIN_LEUCINE_RICH_REPEATS  | REACTOME_NUCLEOTI   | 42  |
| PID_HDAC_CLASSI_PATHWAY                                  | PID_HDAC_CLASSI_PA  | 66  |
| LIN_TUMOR_ESCAPE_FROM_IMMUNE_ATTACK                      | LIN_TUMOR_ESCAPE_   | 15  |
| PID_ATF2_PATHWAY                                         | PID_ATF2_PATHWAY    | 57  |
| KEGG_AMINOACYL_TRNA_BIOSYNTHESIS                         | KEGG_AMINOACYL_TR   | 41  |
| REACTOME_BASE_EXCISION_REPAIR                            | REACTOME_BASE_EXC   | 19  |
| PID_AURORA_A_PATHWAY                                     | PID_AURORA_A_PATH   | 29  |
| VERNELL_RETINOBLASTOMA_PATHWAY_UP                        | VERNELL_RETINOBLAS  | 69  |
| PID_NFKAPPAB_CANONICAL_PATHWAY                           | PID_NFKAPPAB_CANO   | 23  |
| EGUCHI_CELL_CYCLE_RB1_TARGETS                            | EGUCHI_CELL_CYCLE_I | 23  |
| REACTOME_TRANSCRIPTION_COUPLED_NER_TC_NER                | REACTOME_TRANSCRI   | 43  |
| BIOCARTA_MCM_PATHWAY                                     | BIOCARTA_MCM_PATI   | 17  |
| HUANG_GATA2_TARGETS_DN                                   | HUANG_GATA2_TARG    | 71  |
| PLASARI_TGFB1_TARGETS_10HR_UP                            | PLASARI_TGFB1_TARG  | 191 |
| KEGG_BASE_EXCISION_REPAIR                                | KEGG_BASE_EXCISION  | 33  |
| MARCHINI TRABECTEDIN_RESISTANCE_UP                       | MARCHINI TRABECTEI  | 17  |

|                                                                                |                                                                                |     |
|--------------------------------------------------------------------------------|--------------------------------------------------------------------------------|-----|
| REACTOME_MAPK_TARGETS_NUCLEAR_EVENTS_MEDIATED_BY_SHIPP_DLBCL_CURED_VS_FATAL_DN | REACTOME_MAPK_TARGETS_NUCLEAR_EVENTS_MEDIATED_BY_SHIPP_DLBCL_CURED_VS_FATAL_DN | 30  |
| PID_TNF_PATHWAY                                                                | PID_TNF_PATHWAY                                                                | 45  |
| SMID_BREAST_CANCER_LUMINAL_A_DN                                                | SMID_BREAST_CANCER_LUMINAL_A_DN                                                | 18  |
| KAUFFMANN_DNA_REPLICATION_GENES                                                | KAUFFMANN_DNA_REPLICATION_GENES                                                | 137 |
| NIKOLSKY_BREAST_CANCER_6P24_P22_AMPLICON                                       | NIKOLSKY_BREAST_CANCER_6P24_P22_AMPLICON                                       | 20  |
| WAMUNYOKOLI_OVARIAN_CANCER_LMP_UP                                              | WAMUNYOKOLI_OVARIAN_CANCER_LMP_UP                                              | 236 |
| OUELLET_CULTURED_OVARIAN_CANCER_INVASIVE_VS_LMP_UP                             | OUELLET_CULTURED_OVARIAN_CANCER_INVASIVE_VS_LMP_UP                             | 66  |
| OISHI_CHOLANGIOMA_STEM_CELL_LIKE_UP                                            | OISHI_CHOLANGIOMA_STEM_CELL_LIKE_UP                                            | 289 |
| BENPORATH_ES_1                                                                 | BENPORATH_ES_1                                                                 | 353 |
| OXFORD_RALA_OR_RALB_TARGETS_UP                                                 | OXFORD_RALA_OR_RALB_TARGETS_UP                                                 | 48  |
| YAMAZAKI_TCEB3_TARGETS_DN                                                      | YAMAZAKI_TCEB3_TARGETS_DN                                                      | 199 |
| DELACROIX_RARG_BOUND_MEF                                                       | DELACROIX_RARG_BOUND_MEF                                                       | 345 |
| DELLA_RESPONSE_TO_TSA_AND_BUTYRATE                                             | DELLA_RESPONSE_TO_TSA_AND_BUTYRATE                                             | 21  |
| COLLER_MYC_TARGETS_UP                                                          | COLLER_MYC_TARGETS_UP                                                          | 24  |
| PUJANA_BREAST_CANCER_WITH_BRCA1_MUTATED_UP                                     | PUJANA_BREAST_CANCER_WITH_BRCA1_MUTATED_UP                                     | 54  |
| REACTOME_SYNTHESIS_OF_GLYCOSYLPHOSPHATIDYLINOSITOL_C                           | REACTOME_SYNTHESIS_OF_GLYCOSYLPHOSPHATIDYLINOSITOL_C                           | 17  |
| ZHANG_TLX_TARGETS_DN                                                           | ZHANG_TLX_TARGETS_DN                                                           | 86  |
| KEGG_PYRIMIDINE_METABOLISM                                                     | KEGG_PYRIMIDINE_METABOLISM                                                     | 95  |
| NIKOLSKY_BREAST_CANCER_8Q12_Q22_AMPLICON                                       | NIKOLSKY_BREAST_CANCER_8Q12_Q22_AMPLICON                                       | 116 |
| REACTOME_RNA_POL_I_TRANSCRIPTION                                               | REACTOME_RNA_POL_I_TRANSCRIPTION                                               | 68  |
| PID_BARD1_PATHWAY                                                              | PID_BARD1_PATHWAY                                                              | 28  |
| DORSAM_HOXA9_TARGETS_UP                                                        | DORSAM_HOXA9_TARGETS_UP                                                        | 35  |
| ZHANG_TLX_TARGETS_60HR_DN                                                      | ZHANG_TLX_TARGETS_60HR_DN                                                      | 264 |
| PID_TELOMERASE_PATHWAY                                                         | PID_TELOMERASE_PATHWAY                                                         | 67  |
| REACTOME_GOLGI_ASSOCIATED_VESICLE_BIOGENESIS                                   | REACTOME_GOLGI_ASSOCIATED_VESICLE_BIOGENESIS                                   | 49  |
| REACTOME_TRANSFERRIN_ENDOCYTOSIS_AND_RECYCLING                                 | REACTOME_TRANSFERRIN_ENDOCYTOSIS_AND_RECYCLING                                 | 23  |
| REACTOME_CHROMOSOME_MAINTENANCE                                                | REACTOME_CHROMOSOME_MAINTENANCE                                                | 105 |
| REACTOME_GO_AND_EARLY_G1                                                       | REACTOME_GO_AND_EARLY_G1                                                       | 23  |
| MONNIER_POSTRADIATION_TUMOR_ESCAPE_UP                                          | MONNIER_POSTRADIATION_TUMOR_ESCAPE_UP                                          | 367 |
| FOURNIER_ACINAR_DEVELOPMENT_LATE_DN                                            | FOURNIER_ACINAR_DEVELOPMENT_LATE_DN                                            | 21  |
| BIDUS_METASTASIS_UP                                                            | BIDUS_METASTASIS_UP                                                            | 202 |
| PID_TCR_CALCIIUM_PATHWAY                                                       | PID_TCR_CALCIIUM_PATHWAY                                                       | 27  |
| FURUKAWA_DUSP6_TARGETS_PCI35_DN                                                | FURUKAWA_DUSP6_TARGETS_PCI35_DN                                                | 66  |
| GAVIN_FOXP3_TARGETS_CLUSTER_T4                                                 | GAVIN_FOXP3_TARGETS_CLUSTER_T4                                                 | 89  |
| PID_HDAC_CLASSIII_PATHWAY                                                      | PID_HDAC_CLASSIII_PATHWAY                                                      | 24  |
| KEGG_EPITHELIAL_CELL_SIGNALING_IN_HELICOBACTER_PYLORI_I                        | KEGG_EPITHELIAL_CELL_SIGNALING_IN_HELICOBACTER_PYLORI_I                        | 67  |
| EPPERT_PROGENITOR                                                              | EPPERT_PROGENITOR                                                              | 127 |
| NOJIMA_SFRP2_TARGETS_DN                                                        | NOJIMA_SFRP2_TARGETS_DN                                                        | 24  |
| LUCAS_HNF4A_TARGETS_UP                                                         | LUCAS_HNF4A_TARGETS_UP                                                         | 53  |
| KUROZUMI_RESPONSE_TO_ONCOCYTIC_VIRUS_AND_CYCLIC_RGI                            | KUROZUMI_RESPONSE_TO_ONCOCYTIC_VIRUS_AND_CYCLIC_RGI                            | 20  |
| PID_ATR_PATHWAY                                                                | PID_ATR_PATHWAY                                                                | 39  |
| PID_EPHA_FWDPATHWAY                                                            | PID_EPHA_FWDPATHWAY                                                            | 34  |
| BHATTACHARYA_EMBRYONIC_STEM_CELL                                               | BHATTACHARYA_EMBRYONIC_STEM_CELL                                               | 83  |
| REACTOME_REGULATION_OF_GLUKOKINASE_BY_GLUKOKINASE                              | REACTOME_REGULATION_OF_GLUKOKINASE_BY_GLUKOKINASE                              | 27  |
| KRIEG_HYPOXIA_VIA_KDM3A                                                        | KRIEG_HYPOXIA_VIA_KDM3A                                                        | 48  |
| ZHAN_MULTIPLE_MYELOMA_MF_DN                                                    | ZHAN_MULTIPLE_MYELOMA_MF_DN                                                    | 36  |
| CAVARD_LIVER_CANCER_MALIGNANT_VS_BENIGN                                        | CAVARD_LIVER_CANCER_MALIGNANT_VS_BENIGN                                        | 25  |
| WANG_METHYLATED_IN_BREAST_CANCER                                               | WANG_METHYLATED_IN_BREAST_CANCER                                               | 32  |
| REACTOME_TRANSPORT_OF_RIBONUCLEOPROTEINS_INTO_THE                              | REACTOME_TRANSPORT_OF_RIBONUCLEOPROTEINS_INTO_THE                              | 27  |

|                                                      |                     |     |
|------------------------------------------------------|---------------------|-----|
| KOKKINAKIS_METHIONINE_DEPRIVATION_48HR_DN            | KOKKINAKIS_METHION  | 64  |
| REACTOME_ERK_MAPK_TARGETS                            | REACTOME_ERK_MAP    | 21  |
| SUZUKI_RESPONSE_TO_TSA_AND_DECITABINE_1B             | SUZUKI_RESPONSE_TC  | 18  |
| VANOEVELEN_MYOGENESIS_SIN3A_TARGETS                  | VANOEVELEN_MYOGE    | 202 |
| THEILGAARD_NEUTROPHIL_AT_SKIN_WOUND_UP               | THEILGAARD_NEUTRO   | 71  |
| SUNG_METASTASIS_STROMA_DN                            | SUNG_METASTASIS_ST  | 46  |
| FINETTI_BREAST_CANCER_KINOME_RED                     | FINETTI_BREAST_CANC | 16  |
| DAIRKEE_CANCER_PRONE_RESPONSE_BPA_E2                 | DAIRKEE_CANCER_PRC  | 111 |
| REACTOME_TRAF6_MEDIATED_INDUCION_OF_NFKB_AND_MAF     | REACTOME_TRAF6_M    | 73  |
| WANG_CLIM2_TARGETS_UP                                | WANG_CLIM2_TARGET   | 206 |
| CHIANG_LIVER_CANCER_SUBCLASS_PROLIFERATION_UP        | CHIANG_LIVER_CANCE  | 164 |
| SANSOM_APC_MYC_TARGETS                               | SANSOM_APC_MYC_T    | 196 |
| JOSEPH_RESPONSE_TO_SODIUM_BUTYRATE_UP                | JOSEPH_RESPONSE_TC  | 29  |
| KEGG_NUCLEOTIDE_EXCISION_REPAIR                      | KEGG_NUCLEOTIDE_E   | 43  |
| REACTOME_INSULIN_RECEPTOR_RECYCLING                  | REACTOME_INSULIN_I  | 21  |
| ONDER_CDH1_TARGETS_3_DN                              | ONDER_CDH1_TARGET   | 49  |
| KEGG_BASAL_TRANSCRIPTION_FACTORS                     | KEGG_BASAL_TRANSC   | 33  |
| REACTOME_G1_S_TRANSITION                             | REACTOME_G1_S_TRA   | 103 |
| DELPUECH_FOXO3_TARGETS_DN                            | DELPUECH_FOXO3_TA   | 39  |
| REACTOME_TIGHT_JUNCTION_INTERACTIONS                 | REACTOME_TIGHT_JU   | 29  |
| KONG_E2F3_TARGETS                                    | KONG_E2F3_TARGETS   | 94  |
| CROMER_METASTASIS_DN                                 | CROMER_METASTASIS   | 78  |
| GALLUZZI_PREVENT_MITOCHONDIAL_PERMEABILIZATION       | GALLUZZI_PREVENT_M  | 21  |
| GRAHAM_NORMAL QUIESCENT VS NORMAL DIVIDING_DN        | GRAHAM_NORMAL_Q     | 83  |
| MARKEY_RB1_CHRONIC_LOF_UP                            | MARKEY_RB1_CHRON    | 111 |
| ZHOU_CELL_CYCLE_GENES_IN_IR_RESPONSE_6HR             | ZHOU_CELL_CYCLE_GE  | 81  |
| REACTOME_RNA_POL_II_TRANSCRIPTION_PRE_INITIATION_AND | REACTOME_RNA_POL    | 38  |
| PID_P38_ALPHA_BETA_DOWNSTREAM_PATHWAY                | PID_P38_ALPHA_BETA  | 37  |
| LI_CYTIDINE_ANALOG_PATHWAY                           | LI_CYTIDINE_ANALOG  | 17  |
| KEGG_PROXIMAL_TUBULE_BICARBONATE_RECLAMATION         | KEGG_PROXIMAL_TUB   | 20  |
| SHAFFER_IRF4_MULTIPLE_MYELOMA_PROGRAM                | SHAFFER_IRF4_MULTII | 34  |
| VANTVEER_BREAST_CANCER_METASTASIS_DN                 | VANTVEER_BREAST_C   | 107 |
| SUH_COEXPRESSED_WITH_ID1_AND_ID2_UP                  | SUH_COEXPRESSED_V   | 18  |
| FRASOR_RESPONSE_TO_SERM_OR_FULVESTRANT_DN            | FRASOR_RESPONSE_T   | 50  |
| REACTOME_MITOTIC_G1_G1_S_PHASES                      | REACTOME_MITOTIC    | 127 |
| JACKSON_DNMT1_TARGETS_UP                             | JACKSON_DNMT1_TAF   | 76  |
| REACTOME_PURINE_METABOLISM                           | REACTOME_PURINE_M   | 32  |
| NUNODA_RESPONSE_TO_DASATINIB_IMATINIB_UP             | NUNODA_RESPONSE     | 29  |
| REACTOME_NUCLEOTIDE_EXCISION_REPAIR                  | REACTOME_NUCLEOTI   | 48  |
| REACTOME_METABOLISM_OF_AMINO_ACIDS_AND_DERIVATIVES   | REACTOME_METABOL    | 191 |
| MANTOVANI_VIRAL_GPCR_SIGNALING_DN                    | MANTOVANI_VIRAL_G   | 42  |
| ZHAN_MULTIPLE_MYELOMA_HP_DN                          | ZHAN_MULTIPLE_MYE   | 42  |
| BOYALT_LIVER_CANCER_SUBCLASS_G3_UP                   | BOYALT_LIVER_CANC   | 181 |
| MOOTHA_HUMAN_MITODB_6_2002                           | MOOTHA_HUMAN_MI     | 410 |
| REACTOME_SIGNALING_BY_HIPPO                          | REACTOME_SIGNALIN   | 20  |
| MANN_RESPONSE_TO_AMIFOSTINE_UP                       | MANN_RESPONSE_TO    | 20  |
| HE_PTEN_TARGETS_UP                                   | HE_PTEN_TARGETS_U   | 15  |
| NAGASHIMA_NRG1_SIGNALING_UP                          | NAGASHIMA_NRG1_SI   | 168 |
| REACTOME_KINESINS                                    | REACTOME_KINESINS   | 22  |
| IWANAGA_CARCINOGENESIS_BY_KRAS_DN                    | IWANAGA_CARCINOGI   | 114 |



|                                                     |                     |     |
|-----------------------------------------------------|---------------------|-----|
| EHLERS_ANEUPLOIDY_UP                                | EHLERS_ANEUPLOIDY_  | 41  |
| LEE_DOUBLE_POLAR_THYMOCYTE                          | LEE_DOUBLE_POLAR_   | 21  |
| CHIANG_LIVER_CANCER_SUBCLASS_UNANNOTATED_DN         | CHIANG_LIVER_CANCE  | 177 |
| REACTOME_DNA_REPAIR                                 | REACTOME_DNA_REP,   | 101 |
| DUTERTRE ESTRADIOL_RESPONSE_24HR_UP                 | DUTERTRE ESTRADIOL  | 306 |
| MCBRYAN_PUBERTAL_TGFB1_TARGETS_DN                   | MCBRYAN_PUBERTAL_   | 60  |
| ZHANG_BREAST_CANCER_PROGENITORS_UP                  | ZHANG_BREAST_CANC   | 381 |
| REACTOME_RNA_POL_I_TRANSCRIPTION_INITIATION         | REACTOME_RNA_POL_   | 23  |
| GARGALOVIC_RESPONSE_TO_OXIDIZED_PHOSPHOLIPIDS_MAGEN | GARGALOVIC_RESPON   | 22  |
| MORI_PRE_BI_LYMPHOCYTE_DN                           | MORI_PRE_BI_LYMPH   | 72  |
| REACTOME_GLYCEROPHOSPHOLIPID_BIOSYNTHESIS           | REACTOME_GLYCEROF   | 82  |
| SA_TRKA_RECEPTOR                                    | SA_TRKA_RECEPTOR    | 16  |
| ZEMBUTSU_SENSITIVITY_TO_CISPLATIN                   | ZEMBUTSU_SENSITIVI  | 19  |
| PID_P38_MK2_PATHWAY                                 | PID_P38_MK2_PATHW   | 21  |
| ODONNELL_TARGETS_OF_MYC_AND_TFRC_DN                 | ODONNELL_TARGETS_   | 42  |
| AMUNDSON_GENOTOXIC_SIGNATURE                        | AMUNDSON_GENOTO     | 98  |
| REACTOME_FATTY_ACYL_COA_BIOSYNTHESIS                | REACTOME_FATTY_AC   | 18  |
| FOURNIER_ACINAR_DEVELOPMENT_LATE_2                  | FOURNIER_ACINAR_DI  | 259 |
| ABE_VEGFA_TARGETS_30MIN                             | ABE_VEGFA_TARGETS_  | 28  |
| ST_FAS_SIGNALING_PATHWAY                            | ST_FAS_SIGNALING_P/ | 62  |
| REACTOME_RNA_POL_I_RNA_POL_III_AND_MITOCHONDRIAL_TR | REACTOME_RNA_POL_   | 100 |
| WHITEFORD_PEDIATRIC_CANCER_MARKERS                  | WHITEFORD_PEDIATRI  | 114 |
| SCHLOSSER_MYC_TARGETS_REPRESSED_BY_SERUM            | SCHLOSSER_MYC_TAR   | 148 |
| DEBOSSCHER_NFKB_TARGETS_REPRESSED_BY_GLUCOCORTICOID | DEBOSSCHER_NFKB_T.  | 22  |
| IVANOVSKA_MIR106B_TARGETS                           | IVANOVSKA_MIR106B_  | 82  |
| REACTOME_IRON_UPTAKE_AND_TRANSPORT                  | REACTOME_IRON_UP1   | 32  |
| SCHUHMACHER_MYC_TARGETS_UP                          | SCHUHMACHER_MYC_    | 75  |
| REACTOME_ACTIVATED_TAK1_MEDIATES_P38_MAPK_ACTIVATIC | REACTOME_ACTIVATE   | 17  |
| KANG_DOXORUBICIN_RESISTANCE_UP                      | KANG_DOXORUBICIN_   | 50  |
| ZHAN_LATE_DIFFERENTIATION_GENES_DN                  | ZHAN_LATE_DIFFEREN  | 15  |
| MITSIADES_RESPONSE_TO_APLIDIN_DN                    | MITSIADES_RESPONSE  | 233 |
| ROSTY_CERVICAL_CANCER_PROLIFERATION_CLUSTER         | ROSTY_CERVICAL_CAN  | 134 |
| CAMPS_COLON_CANCER_COPY_NUMBER_DN                   | CAMPS_COLON_CANC    | 33  |
| KEGG_ARACHIDONIC_ACID_METABOLISM                    | KEGG_ARACHIDONIC_   | 45  |
| PHONG_TNF_TARGETS_UP                                | PHONG_TNF_TARGETS   | 63  |
| PID_CASPASE_PATHWAY                                 | PID_CASPASE_PATHW.  | 50  |
| WHITFIELD_CELL_CYCLE_LITERATURE                     | WHITFIELD_CELL_CYCL | 44  |
| SESTO_RESPONSE_TO_UV_C3                             | SESTO_RESPONSE_TO_  | 20  |
| CAMPS_COLON_CANCER_COPY_NUMBER_UP                   | CAMPS_COLON_CANC    | 78  |
| KANG_CISPLATIN_RESISTANCE_UP                        | KANG_CISPLATIN_RESI | 16  |
| REACTOME_POST_TRANSLATIONAL_MODIFICATION_SYNTHESIS_ | REACTOME_POST_TRA   | 26  |
| GHANDHI_DIRECT_IRRADIATION_UP                       | GHANDHI_DIRECT_IRR  | 87  |
| MARSON_FOXP3_TARGETS_STIMULATED_UP                  | MARSON_FOXP3_TARI   | 29  |
| RAMALHO_STEMNESS_UP                                 | RAMALHO_STEMNESS    | 193 |
| LOPEZ_MBD_TARGETS_IMPRINTED_AND_X_LINKED            | LOPEZ_MBD_TARGETS   | 17  |
| ZHANG_RESPONSE_TO_CANTHARIDIN_UP                    | ZHANG_RESPONSE_TC   | 19  |
| REACTOME_NOD1_2_SIGNALING_PATHWAY                   | REACTOME_NOD1_2_    | 29  |
| MISSIAGLIA_REGULATED_BY_METHYLATION_DN              | MISSIAGLIA_REGULATI | 112 |
| REACTOME_S_PHASE                                    | REACTOME_S_PHASE    | 105 |
| GOLDRATH_ANTIGEN_RESPONSE                           | GOLDRATH_ANTIGEN_   | 318 |

|                                                      |                     |     |
|------------------------------------------------------|---------------------|-----|
| VANTVEER_BREAST_CANCER_BRCA1_UP                      | VANTVEER_BREAST_C/  | 31  |
| KORKOLA_TERATOMA                                     | KORKOLA_TERATOMA    | 39  |
| RAGHAVACHARI_PLATELET_SPECIFIC_GENES                 | RAGHAVACHARI_PLAT   | 66  |
| REACTOME_SULFUR_AMINO_ACID_METABOLISM                | REACTOME_SULFUR_A   | 24  |
| SIG_CHEMOTAXIS                                       | SIG_CHEMOTAXIS      | 45  |
| GRANDVAUX_IRF3_TARGETS_DN                            | GRANDVAUX_IRF3_TA   | 17  |
| HOLLERN_EMT_BREAST_TUMOR_DN                          | HOLLERN_EMT_BREAS   | 87  |
| REACTOME_REGULATION_OF_GENE_EXPRESSION_IN_BETA_CELL  | REACTOME_REGULATI   | 19  |
| ZHOU_TNF_SIGNALING_30MIN                             | ZHOU_TNF_SIGNALINC  | 52  |
| KANNAN_TP53_TARGETS_DN                               | KANNAN_TP53_TARGE   | 21  |
| WONG_MITOCHONDRIA_GENE_MODULE                        | WONG_MITOCHONDR     | 212 |
| REACTOME_DEADENYLATION_DEPENDENT_MRNA_DECAY          | REACTOME_DEADENYI   | 43  |
| PID_IL3_PATHWAY                                      | PID_IL3_PATHWAY     | 26  |
| BENPORATH_ES_2                                       | BENPORATH_ES_2      | 40  |
| PID_P53_DOWNSTREAM_PATHWAY                           | PID_P53_DOWNSTREA   | 122 |
| FUJII_YBX1_TARGETS_DN                                | FUJII_YBX1_TARGETS_ | 190 |
| BIOCARTA_HIVNEF_PATHWAY                              | BIOCARTA_HIVNEF_PA  | 56  |
| LE_EGR2_TARGETS_UP                                   | LE_EGR2_TARGETS_UF  | 104 |
| REACTOME_MEIOSIS                                     | REACTOME_MEIOSIS    | 93  |
| HU_ANGIOGENESIS_DN                                   | HU_ANGIOGENESIS_DI  | 34  |
| KAMMINGA_EZH2_TARGETS                                | KAMMINGA_EZH2_TA    | 41  |
| FERRANDO_T_ALL_WITH_MLL_ENL_FUSION_DN                | FERRANDO_T_ALL_WI'  | 81  |
| HAHTOLA_MYCOSIS_FUNGOIDES_CD4_DN                     | HAHTOLA_MYCOSIS_F   | 107 |
| HOEGERKORP_CD44_TARGETS_DIRECT_UP                    | HOEGERKORP_CD44_T   | 26  |
| SCIBETTA_KDM5B_TARGETS_UP                            | SCIBETTA_KDM5B_TAF  | 15  |
| TAKEDA_TARGETS_OF_NUP98_HOXA9_FUSION_6HR_DN          | TAKEDA_TARGETS_OF.  | 38  |
| REACTOME_SYNTHESIS_OF_DNA                            | REACTOME_SYNTHESI!  | 90  |
| KEGG_RNA_DEGRADATION                                 | KEGG_RNA_DEGRADA'   | 57  |
| KASLER_HDAC7_TARGETS_1_DN                            | KASLER_HDAC7_TARG   | 17  |
| BIOCARTA_CD40_PATHWAY                                | BIOCARTA_CD40_PATF  | 15  |
| KIM_PTEN_TARGETS_UP                                  | KIM_PTEN_TARGETS_I  | 17  |
| WANG_TNF_TARGETS                                     | WANG_TNF_TARGETS    | 24  |
| REACTOME_NEP_NS2_INTERACTS_WITH_THE_CELLULAR_EXPORT  | REACTOME_NEP_NS2_   | 27  |
| GENTILE_RESPONSE_CLUSTER_D3                          | GENTILE_RESPONSE_C  | 59  |
| REACTOME_MITOCHONDRIAL_TRNA_AMINOACYLATION           | REACTOME_MITOCHO    | 21  |
| ZHOU_CELL_CYCLE_GENES_IN_IR_RESPONSE_24HR            | ZHOU_CELL_CYCLE_GE  | 119 |
| MOLENAAR_TARGETS_OF_CCND1_AND_CDK4_DN                | MOLENAAR_TARGETS_   | 48  |
| RASHI_NFKB1_TARGETS                                  | RASHI_NFKB1_TARGET  | 18  |
| MARIADASON_RESPONSE_TO_CURCUMIN_SULINDAC_5           | MARIADASON_RESPOI   | 23  |
| REACTOME_RNA_POL_II_PRE_TRANSCRIPTION_EVENTS         | REACTOME_RNA_POL_   | 50  |
| REACTOME_TAK1_ACTIVATES_NFKB_BY_PHOSPHORYLATION_AN   | REACTOME_TAK1_ACT   | 22  |
| AMIT_EGF_RESPONSE_480_HELA                           | AMIT_EGF_RESPONSE_  | 151 |
| SESTO_RESPONSE_TO_UV_C5                              | SESTO_RESPONSE_TO_  | 45  |
| PID_AR_TF_PATHWAY                                    | PID_AR_TF_PATHWAY   | 51  |
| HOLLMANN_APOPTOSIS_VIA_CD40_UP                       | HOLLMANN_APOPTOS    | 184 |
| MATZUK_IMPLANTATION_AND_UTERINE                      | MATZUK_IMPLANTATI   | 21  |
| SOTIRIOU_BREAST_CANCER_GRADE_1_VS_3_UP               | SOTIRIOU_BREAST_CA  | 140 |
| HEDENFALK_BREAST_CANCER_HEREDITARY_VS_SPORADIC       | HEDENFALK_BREAST_C  | 47  |
| BILANGES_RAPAMYCIN_SENSITIVE_VIA_TSC1_AND_TSC2       | BILANGES_RAPAMYCIN  | 67  |
| REACTOME_ASSOCIATION_OF_TRIC_CCT_WITH_TARGET_PROTEIN | REACTOME_ASSOCIAT   | 26  |

|                                                    |                     |     |
|----------------------------------------------------|---------------------|-----|
| LIANG_HEMATOPOIESIS_STEM_CELL_NUMBER_SMALL_VS_HUGE | LIANG_HEMATOPOIES   | 31  |
| BROWNE_HCMV_INFECTION_2HR_DN                       | BROWNE_HCMV_INFE    | 48  |
| SCIAN_INVERSED_TARGETS_OF_TP53_AND_TP73_DN         | SCIAN_INVERSED_TAR  | 28  |
| LINDSTEDT_DENDRITIC_CELL_MATURATION_B              | LINDSTEDT_DENDRITIC | 51  |
| NIELSEN_LIPOSARCOMA_DN                             | NIELSEN_LIPOSARCOM  | 19  |
| PID_INTEGRIN_A4B1_PATHWAY                          | PID_INTEGRIN_A4B1_I | 33  |
| RIZ_ERYTHROID_DIFFERENTIATION                      | RIZ_ERYTHROID_DIFFE | 74  |
| PID_E2F_PATHWAY                                    | PID_E2F_PATHWAY     | 69  |
| TARTE_PLASMA_CELL_VS_B_LYMPHOCYTE_DN               | TARTE_PLASMA_CELL_  | 32  |
| VILIMAS_NOTCH1_TARGETS_UP                          | VILIMAS_NOTCH1_TAF  | 50  |
| SANSOM_APC_TARGETS_REQUIRE_MYC                     | SANSOM_APC_TARGET   | 191 |
| KIM_WT1_TARGETS_8HR_UP                             | KIM_WT1_TARGETS_8   | 154 |
| IWANAGA_E2F1_TARGETS_INDUCED_BY_SERUM              | IWANAGA_E2F1_TARG   | 29  |
| SMITH_TERT_TARGETS_UP                              | SMITH_TERT_TARGETS  | 137 |
| REACTOME_GLOBAL_GENOMIC_NER_GG_NER                 | REACTOME_GLOBAL_C   | 32  |
| REACTOME_TRANSCRIPTION                             | REACTOME_TRANSCRI   | 176 |
| MANALO_HYPOXIA_DN                                  | MANALO_HYPOXIA_DI   | 274 |
| MOLENAAR_TARGETS_OF_CCND1_AND_CDK4_UP              | MOLENAAR_TARGETS_   | 52  |
| MORI_LARGE_PRE_BII_LYMPHOCYTE_DN                   | MORI_LARGE_PRE_BII  | 52  |
| REACTOME_TRIGLYCERIDE_BIOSYNTHESIS                 | REACTOME_TRIGLYCEI  | 37  |
| DAZARD_UV_RESPONSE_CLUSTER_G2                      | DAZARD_UV_RESPONS   | 29  |
| LINDSTEDT_DENDRITIC_CELL_MATURATION_C              | LINDSTEDT_DENDRITIC | 62  |
| REACTOME_AMYLOIDS                                  | REACTOME_AMYLOID!   | 61  |
| REACTOME_TRANSPORT_OF_MATURE_TRANSCRIPT_TO_CYTOPL  | REACTOME_TRANSPOI   | 52  |
| LUND_SILENCED_BY_METHYLATION                       | LUND_SILENCED_BY_M  | 16  |
| LEE_METASTASIS_AND_RNA_PROCESSING_UP               | LEE_METASTASIS_AND  | 17  |
| HEDENFALK_BREAST_CANCER_BRCA1_VS_BRCA2             | HEDENFALK_BREAST_C  | 153 |
| BHAT_ESR1_TARGETS_VIA_AKT1_UP                      | BHAT_ESR1_TARGETS_  | 260 |
| EPPERT_LSC_R                                       | EPPERT_LSC_R        | 34  |
| STEIN_ESR1_TARGETS                                 | STEIN_ESR1_TARGETS  | 81  |
| KEGG_SMALL_CELL_LUNG_CANCER                        | KEGG_SMALL_CELL_LL  | 82  |
| REACTOME_NFKB_AND_MAP_KINASES_ACTIVATION_MEDIATED_ | REACTOME_NFKB_ANI   | 69  |
| WANG_TARGETS_OF_MLL_CBP_FUSION_UP                  | WANG_TARGETS_OF_I   | 40  |
| VANHARANTA_UTERINE_FIBROID_DN                      | VANHARANTA_UTERIN   | 59  |
| CEBALLOS_TARGETS_OF_TP53_AND_MYC_DN                | CEBALLOS_TARGETS_C  | 35  |
| KEGG_MATURITY_ONSET_DIABETES_OF_THE_YOUNG          | KEGG_MATURITY_ONS   | 24  |
| PUJANA_BREAST_CANCER_LIT_INT_NETWORK               | PUJANA_BREAST_CAN   | 96  |
| CHOW_RASSF1_TARGETS_DN                             | CHOW_RASSF1_TARGE   | 29  |
| JUBAN_TARGETS_OF_SPI1_AND_FLI1_DN                  | JUBAN_TARGETS_OF_!  | 85  |
| REACTOME_CELL_CELL_JUNCTION_ORGANIZATION           | REACTOME_CELL_CELL  | 56  |
| SUMI_HNF4A_TARGETS                                 | SUMI_HNF4A_TARGET   | 27  |
| DEURIG_T_CELL_PROLYMPHOCYTIC_LEUKEMIA_UP           | DEURIG_T_CELL_PROL  | 326 |
| MCMURRAY_TP53_HRAS_COOPERATION_RESPONSE_UP         | MCMURRAY_TP53_HR    | 25  |
| WU_APOPTOSIS_BY_CDKN1A_VIA_TP53                    | WU_APOPTOSIS_BY_C   | 53  |
| REACTOME_M_G1_TRANSITION                           | REACTOME_M_G1_TR    | 77  |
| LEE_RECENT_THYMIC_EMIGRANT                         | LEE_RECENT_THYMIC_  | 192 |
| BROWNE_HCMV_INFECTION_12HR_UP                      | BROWNE_HCMV_INFE    | 92  |
| YORDY_RECIPROCAL_REGULATION_BY_ETS1_AND_SP100_DN   | YORDY_RECIPROCAL_F  | 67  |
| ST_B_CELL_ANTIGEN_RECEPTOR                         | ST_B_CELL_ANTIGEN_! | 38  |
| GRADE_COLON_AND_RECTAL_CANCER_UP                   | GRADE_COLON_AND_    | 267 |

|                                                    |                      |     |
|----------------------------------------------------|----------------------|-----|
| REACTOME_PERK_REGULATED_GENE_EXPRESSION            | REACTOME_PERK_REG    | 27  |
| SEKI_INFLAMMATORY_RESPONSE_LPS_UP                  | SEKI_INFLAMMATORY    | 74  |
| SHAFFER_IRF4_TARGETS_IN_ACTIVATED_DENDRITIC_CELL   | SHAFFER_IRF4_TARGETS | 60  |
| HINATA_NFKB_TARGETS_FIBROBLAST_UP                  | HINATA_NFKB_TARGETS  | 81  |
| XU_HGF_SIGNALING_NOT_VIA_AKT1_6HR                  | XU_HGF_SIGNALING_N   | 26  |
| BERENJENO_TRANSFORMED_BY_RHOA_FOREVER_DN           | BERENJENO_TRANSFO    | 31  |
| VARELA_ZMPSTE24_TARGETS_UP                         | VARELA_ZMPSTE24_T/   | 37  |
| BOYLAN_MULTIPLE_MYELOMA_C_D_UP                     | BOYLAN_MULTIPLE_M    | 128 |
| YAN_ESCAPE_FROM_ANOIKIS                            | YAN_ESCAPE_FROM_A    | 21  |
| LABBE_TARGETS_OF_TGFB1_AND_WNT3A_DN                | LABBE_TARGETS_OF_T   | 98  |
| KOBAYASHI_RESPONSE_TO_ROMIDEPSIN                   | KOBAYASHI_RESPONSI   | 18  |
| REACTOME_HIV_INFECTION                             | REACTOME_HIV_INFEC   | 179 |
| REACTOME_CELL_CYCLE                                | REACTOME_CELL_CYCI   | 378 |
| BIOCARTA_DEATH_PATHWAY                             | BIOCARTA_DEATH_PA    | 31  |
| WESTON_VEGFA_TARGETS_3HR                           | WESTON_VEGFA_TARC    | 70  |
| OUYANG_PROSTATE_CANCER_PROGRESSION_DN              | OUYANG_PROSTATE_C    | 19  |
| HU_GENOTOXIN_ACTION_DIRECT_VS_INDIRECT_24HR        | HU_GENOTOXIN_ACTI    | 49  |
| LEIN_OLIGODENDROCYTE_MARKERS                       | LEIN_OLIGODENDROC    | 67  |
| BASSO_B_LYMPHOCYTE_NETWORK                         | BASSO_B_LYMPHOCYT    | 138 |
| BHAT_ESR1_TARGETS_VIA_AKT1_DN                      | BHAT_ESR1_TARGETS    | 77  |
| GEORGES_CELL_CYCLE_MIR192_TARGETS                  | GEORGES_CELL_CYCLE   | 60  |
| REACTOME_LOSS_OF_NLP_FROM_MITOTIC_CENTROSOMES      | REACTOME_LOSS_OF     | 53  |
| PARK_TRETINOIN_RESPONSE_AND_RARA_PLZF_FUSION       | PARK_TRETINOIN_RES   | 21  |
| SLEBOS_HEAD_AND_NECK_CANCER_WITH_HPV_UP            | SLEBOS_HEAD_AND_N    | 74  |
| REACTOME_MYD88_MAL_CASCADE_INITIATED_ON_PLASMA_ME  | REACTOME_MYD88_M     | 79  |
| KEGG_NOD_LIKE_RECEPTOR_SIGNALING_PATHWAY           | KEGG_NOD_LIKE_REC    | 55  |
| WORSCHER_TUMOR_REJECTION_UP                        | WORSCHER_TUMOR       | 52  |
| MENSSEN_MYC_TARGETS                                | MENSSEN_MYC_TARG     | 50  |
| LOCKWOOD_AMPLIFIED_IN_LUNG_CANCER                  | LOCKWOOD_AMPLIFIE    | 200 |
| ST_JNK_MAPK_PATHWAY                                | ST_JNK_MAPK_PATHM    | 38  |
| BILD_HRAS_ONCOGENIC_SIGNATURE                      | BILD_HRAS_ONCOGEN    | 231 |
| REACTOME_MICRORNA_MIRNA_BIOGENESIS                 | REACTOME_MICRORN     | 22  |
| LENAOUR_DENDRITIC_CELL_MATURATION_DN               | LENAOUR_DENDRITIC    | 117 |
| SHEPARD_BMYB_MORPHOLINO_UP                         | SHEPARD_BMYB_MOR     | 192 |
| PID_VEGFR1_PATHWAY                                 | PID_VEGFR1_PATHWA    | 26  |
| MOOTHA_MITOCHONDRIA                                | MOOTHA_MITOCHON      | 420 |
| SIG_PIP3_SIGNALING_IN_CARDIAC_MYOCYTES             | SIG_PIP3_SIGNALING   | 66  |
| TANG_SENESCENCE_TP53_TARGETS_DN                    | TANG_SENESCENCE_TI   | 51  |
| CUI_TCF21_TARGETS_DN                               | CUI_TCF21_TARGETS    | 28  |
| GALLUZZI_PERMEABILIZE_MITOCHONDRIA                 | GALLUZZI_PERMEABIL   | 41  |
| SCHLINGEMANN_SKIN_CARCINOGENESIS_TPA_UP            | SCHLINGEMANN_SKIN    | 33  |
| RICKMAN_TUMOR_DIFFERENTIATED_WELL_VS_POORLY_DN     | RICKMAN_TUMOR_DII    | 339 |
| REACTOME_SYNTHESIS_OF_BILE_ACIDS_AND_BILE_SALTS    | REACTOME_SYNTHESI    | 18  |
| LEE_CALORIE_RESTRICTION_NEOCORTEX_DN               | LEE_CALORIE_RESTRIC  | 84  |
| WATANABE_RECTAL_CANCER_RADIOOTHERAPY_RESPONSIVE_UP | WATANABE_RECTAL_C    | 95  |
| KEGG_GNRH_SIGNALING_PATHWAY                        | KEGG_GNRH_SIGNALII   | 95  |
| CROONQUIST_NRAS_SIGNALING_DN                       | CROONQUIST_NRAS_S    | 70  |
| PROVENZANI_METASTASIS_UP                           | PROVENZANI_METAST    | 180 |
| AMUNDSON_RESPONSE_TO_ARSENITE                      | AMUNDSON_RESPONS     | 197 |
| SCHURINGA_STATS5A_TARGETS_UP                       | SCHURINGA_STATS5A    | 17  |

|                                                       |                      |     |
|-------------------------------------------------------|----------------------|-----|
| LINDGREN_BLADDER_CANCER_CLUSTER_3_UP                  | LINDGREN_BLADDER_C   | 295 |
| ZHAN_MULTIPLE_MYELOMA_PR_UP                           | ZHAN_MULTIPLE_MYE    | 43  |
| ZHANG_ANTIVIRAL_RESPONSE_TO_RIBAVIRIN_DN              | ZHANG_ANTIVIRAL_RE   | 51  |
| WANG_TARGETS_OF_MLL_CBP_FUSION_DN                     | WANG_TARGETS_OF_I    | 43  |
| ZHONG_RESPONSE_TO_AZACITIDINE_AND_TSA_DN              | ZHONG_RESPONSE_TC    | 59  |
| JISON_SICKLE_CELL_DISEASE_DN                          | JISON_SICKLE_CELL_DI | 169 |
| WANG_ESOPHAGUS_CANCER_VS_NORMAL_DN                    | WANG_ESOPHAGUS_C     | 95  |
| SUBTIL_PROGESTIN_TARGETS                              | SUBTIL_PROGESTIN_T/  | 34  |
| REACTOME_RECRUITMENT_OF_MITOTIC_CENTROSOME_PROTEIN    | REACTOME_RECRUITM    | 60  |
| HASLINGER_B_CLL_WITH_6Q21_DELETION                    | HASLINGER_B_CLL_WI   | 16  |
| HOFMANN_MYELODYSPLASTIC_SYNDROME_LOW_RISK_DN          | HOFMANN_MYELODY:     | 29  |
| FRASOR_TAMOXIFEN_RESPONSE_UP                          | FRASOR_TAMOXIFEN_    | 47  |
| ONO_AML1_TARGETS_UP                                   | ONO_AML1_TARGETS_    | 23  |
| RASHI_RESPONSE_TO_IONIZING_RADIATION_1                | RASHI_RESPONSE_TO_   | 40  |
| ST_P38_MAPK_PATHWAY                                   | ST_P38_MAPK_PATHV    | 37  |
| REACTOME_MRNA_CAPPING                                 | REACTOME_MRNA_CA     | 27  |
| CAIRO_HEPATOBLASTOMA_UP                               | CAIRO_HEPATOBLASTO   | 188 |
| REACTOME_SYNTHESIS_AND_INTERCONVERSION_OF_NUCLEOTIDES | REACTOME_SYNTHESI    | 17  |
| DAZARD_RESPONSE_TO_UV_SCC_UP                          | DAZARD_RESPONSE_T    | 110 |
| TIEN_INTESTINE_PROBIOTICS_6HR_DN                      | TIEN_INTESTINE_PROE  | 156 |
| CROONQUIST_IL6_DEPRIVATION_DN                         | CROONQUIST_IL6_DEF   | 95  |
| SMID_BREAST_CANCER_RELAPSE_IN_PLEURA_DN               | SMID_BREAST_CANCEI   | 19  |
| LEE_EARLY_T_LYMPHOCYTE_UP                             | LEE_EARLY_T_LYMPHC   | 94  |
| YIH_RESPONSE_TO_ARSENITE_C3                           | YIH_RESPONSE_TO_AF   | 34  |
| HAHTOLA_SEZARY_SYNDROME_UP                            | HAHTOLA_SEZARY_SYI   | 85  |
| ADDYA_ERYTHROID_DIFFERENTIATION_BY_HEMIN              | ADDYA_ERYTHROID_D    | 64  |
| REACTOME_ENDOSOMAL_SORTING_COMPLEX_REQUIRED_FOR       | REACTOME_ENDOSOM     | 25  |
| MARSON_FOXP3_CORE_DIRECT_TARGETS                      | MARSON_FOXP3_COR     | 18  |
| REACTOME_G1_PHASE                                     | REACTOME_G1_PHASE    | 33  |
| VECCHI_GASTRIC_CANCER_ADVANCED_VS_EARLY_DN            | VECCHI_GASTRIC_CAN   | 110 |
| KANG_DOXORUBICIN_RESISTANCE_DN                        | KANG_DOXORUBICIN_    | 17  |
| SENESE_HDAC1_TARGETS_UP                               | SENESE_HDAC1_TARG    | 406 |
| BIOCARTA_NFKB_PATHWAY                                 | BIOCARTA_NFKB_PATH   | 23  |
| KIM_MYC_AMPLIFICATION_TARGETS_UP                      | KIM_MYC_AMPLIFICA    | 183 |
| BOYALT_LIVER_CANCER_SUBCLASS_G12_UP                   | BOYALT_LIVER_CANC    | 36  |
| BOYALT_LIVER_CANCER_SUBCLASS_G5_DN                    | BOYALT_LIVER_CANC    | 22  |
| SCHLOSSER_MYC_TARGETS_AND_SERUM_RESPONSE_UP           | SCHLOSSER_MYC_TAR    | 45  |
| FERREIRA_EWINGS_SARCOMA_UNSTABLE_VS_STABLE_UP         | FERREIRA_EWINGS_SA   | 152 |
| NOUZOVA_METHYLATED_IN_APL                             | NOUZOVA_METHYLAT     | 55  |
| ZEMBUTSU_SENSITIVITY_TO_VINCISTINE                    | ZEMBUTSU_SENSITIVI   | 18  |
| YU_MYC_TARGETS_UP                                     | YU_MYC_TARGETS_UP    | 40  |
| LIU_COMMON_CANCER_GENES                               | LIU_COMMON_CANCE     | 63  |
| BIOCARTA_MTA3_PATHWAY                                 | BIOCARTA_MTA3_PAT    | 17  |
| GENTILE_UV_LOW_DOSE_UP                                | GENTILE_UV_LOW_DC    | 25  |
| HEIDENBLAD_AMPLICON_12P11_12_DN                       | HEIDENBLAD_AMPLIC    | 21  |
| ONDER_CDH1_TARGETS_2_DN                               | ONDER_CDH1_TARGET    | 420 |
| KEGG_PORPHYRIN_AND_CHLOROPHYLL_METABOLISM             | KEGG_PORPHYRIN_AN    | 29  |
| JAZAG_TGFB1_SIGNALING_VIA_SMAD4_DN                    | JAZAG_TGFB1_SIGNAL   | 58  |
| KIM_ALL_DISORDERS_CALB1_CORR_DN                       | KIM_ALL_DISORDERS_   | 33  |
| MIDORIKAWA_AMPLIFIED_IN_LIVER_CANCER                  | MIDORIKAWA_AMPLIF    | 50  |

|                                                     |                     |     |
|-----------------------------------------------------|---------------------|-----|
| LOPES_METHYLATED_IN_COLON_CANCER_DN                 | LOPES_METHYLATED_   | 26  |
| HASLINGER_B_CLL_WITH_CHROMOSOME_12_TRISOMY          | HASLINGER_B_CLL_WI  | 23  |
| CHEMNITZ_RESPONSE_TO_PROSTAGLANDIN_E2_UP            | CHEMNITZ_RESPONSE   | 129 |
| ZUCCHI_METASTASIS_DN                                | ZUCCHI_METASTASIS_  | 40  |
| KEGG_MAPK_SIGNALING_PATHWAY                         | KEGG_MAPK_SIGNALII  | 257 |
| REACTOME_MITOTIC_PROMETAPHASE                       | REACTOME_MITOTIC_   | 85  |
| DOANE_RESPONSE_TO_ANDROGEN_UP                       | DOANE_RESPONSE_TC   | 152 |
| YANG_BREAST_CANCER_ESR1_BULK_UP                     | YANG_BREAST_CANCE   | 24  |
| PICCALUGA_ANGIOIMMUNOBLASTIC_LYMPHOMA_DN            | PICCALUGA_ANGIOIMI  | 126 |
| RICKMAN_TUMOR_DIFFERENTIATED_WELL_VS_POORLY_UP      | RICKMAN_TUMOR_DII   | 210 |
| PID_RHODOPSIN_PATHWAY                               | PID_RHODOPSIN_PATF  | 23  |
| FLECHNER_BIOPSY_KIDNEY_TRANSPLANT_OK_VS_DONOR_DN    | FLECHNER_BIOPSY_KIE | 23  |
| PID_LKB1_PATHWAY                                    | PID_LKB1_PATHWAY    | 45  |
| REACTOME_DNA_REPLICATION                            | REACTOME_DNA_REPI   | 186 |
| REACTOME_MITOTIC_G2_G2_M_PHASES                     | REACTOME_MITOTIC_   | 75  |
| HOFMANN_CELL_LYMPHOMA_UP                            | HOFMANN_CELL_LYM    | 46  |
| KENNY_CTNNB1_TARGETS_UP                             | KENNY_CTNNB1_TARG   | 47  |
| REACTOME_ASSEMBLY_OF_THE_PRE_REPLICATIVE_COMPLEX    | REACTOME_ASSEMBLY   | 63  |
| BURTON_ADIPOGENESIS_2                               | BURTON_ADIPOGENES   | 72  |
| SHIN_B_CELL_LYMPHOMA_CLUSTER_3                      | SHIN_B_CELL_LYMPHC  | 28  |
| RICKMAN_HEAD_AND_NECK_CANCER_C                      | RICKMAN_HEAD_AND    | 89  |
| ZHANG_TLX_TARGETS_36HR_DN                           | ZHANG_TLX_TARGETS   | 174 |
| AUNG_GASTRIC_CANCER                                 | AUNG_GASTRIC_CANC   | 50  |
| PID_MYC_PATHWAY                                     | PID_MYC_PATHWAY     | 24  |
| FAELT_B_CLL_WITH_VH3_21_UP                          | FAELT_B_CLL_WITH_V  | 42  |
| HOOI_ST7_TARGETS_UP                                 | HOOI_ST7_TARGETS_U  | 75  |
| TONKS_TARGETS_OF_RUNX1_RUNX1T1_FUSION_MONOCYTE_UP   | TONKS_TARGETS_OF_   | 190 |
| FISCHER_G2_M_CELL_CYCLE                             | FISCHER_G2_M_CELL_  | 215 |
| PID_MTOR_4PATHWAY                                   | PID_MTOR_4PATHWA    | 68  |
| XU_RESPONSE_TO_TRETINOIN_AND_NSC682994_UP           | XU_RESPONSE_TO_TR   | 16  |
| REACTOME_METABOLISM_OF_NON_CODING_RNA               | REACTOME_METABOL    | 47  |
| ROYLANCE_BREAST_CANCER_16Q_COPY_NUMBER_UP           | ROYLANCE_BREAST_C/  | 51  |
| FLECHNER_PBL_KIDNEY_TRANSPLANT_REJECTED_VS_OK_DN    | FLECHNER_PBL_KIDNE  | 49  |
| CEBALLOS_TARGETS_OF_TP53_AND_MYC_UP                 | CEBALLOS_TARGETS_C  | 20  |
| RICKMAN_METASTASIS_UP                               | RICKMAN_METASTASI   | 289 |
| KASLER_HDAC7_TARGETS_1_UP                           | KASLER_HDAC7_TARG   | 186 |
| SHAFFER_IRF4_TARGETS_IN_PLASMA_CELL_VS_MATURE_B_LYM | SHAFFER_IRF4_TARGE  | 65  |
| BENPORATH_ES_CORE_NINE_CORRELATED                   | BENPORATH_ES_CORE   | 98  |
| FONTAINE_PAPILLARY_THYROID_CARCINOMA_UP             | FONTAINE_PAPILLARY  | 58  |
| BIOCARTA_CHREBP2_PATHWAY                            | BIOCARTA_CHREBP2_F  | 40  |
| REACTOME_CELL_CYCLE_MITOTIC                         | REACTOME_CELL_CYCI  | 301 |
| ZHAN_MULTIPLE_MYELOMA_CD1_DN                        | ZHAN_MULTIPLE_MYE   | 37  |
| RUIZ_TNC_TARGETS_DN                                 | RUIZ_TNC_TARGETS_D  | 137 |
| DELPUECH_FOXO3_TARGETS_UP                           | DELPUECH_FOXO3_TA   | 63  |
| BIOCARTA_FAS_PATHWAY                                | BIOCARTA_FAS_PATHV  | 28  |
| TOYOTA_TARGETS_OF_MIR34B_AND_MIR34C                 | TOYOTA_TARGETS_OF   | 395 |
| CONCANNON_APOPTOSIS_BY_EPOXOMICIN_UP                | CONCANNON_APOPTC    | 220 |
| BIOCARTA_IL12_PATHWAY                               | BIOCARTA_IL12_PATH' | 21  |
| UROSEVIC_RESPONSE_TO_IMIQUIMOD                      | UROSEVIC_RESPONSE_  | 17  |
| HEIDENBLAD_AMPLICON_8Q24_UP                         | HEIDENBLAD_AMPLIC   | 30  |

|                                                       |                     |     |
|-------------------------------------------------------|---------------------|-----|
| BURTON_ADIPOGENESIS_3                                 | BURTON_ADIPOGENESIS | 98  |
| STEIN_ESRRA_TARGETS_UP                                | STEIN_ESRRA_TARGET  | 345 |
| ACEVEDO_LIVER_TUMOR_VS_NORMAL_ADJACENT_TISSUE_DN      | ACEVEDO_LIVER_TUM   | 234 |
| KEGG_GLYOXYLATE_AND_DICARBOXYLATE_METABOLISM          | KEGG_GLYOXYLATE_AI  | 16  |
| AMIT_SERUM_RESPONSE_120_MCF10A                        | AMIT_SERUM_RESPON   | 61  |
| IVANOVA_HEMATOPOIESIS_EARLY_PROGENITOR                | IVANOVA_HEMATOPO    | 472 |
| BILD_E2F3_ONCOGENIC_SIGNATURE                         | BILD_E2F3_ONCOGENI  | 211 |
| KIM_WT1_TARGETS_DN                                    | KIM_WT1_TARGETS_D   | 422 |
| VILLANUEVA_LIVER_CANCER_KRT19_UP                      | VILLANUEVA_LIVER_C/ | 155 |
| CHARAFE_BREAST_CANCER_BASAL_VS_MESENCHYMAL_UP         | CHARAFE_BREAST_CAI  | 103 |
| REACTOME_N_GLYCAN_ANTENNAE_ELONGATION_IN_THE_MEDI     | REACTOME_N_GLYCAN   | 18  |
| ZWANG_CLASS_3_TRANSIENTLY_INDUCED_BY_EGF              | ZWANG_CLASS_3_TRA   | 209 |
| ZHAN_MULTIPLE_MYELOMA_PR_DN                           | ZHAN_MULTIPLE_MYE   | 44  |
| WEST_ADRENOCORTICAL_CARCINOMA_VS_ADENOMA_DN           | WEST_ADRENOCORTIC   | 17  |
| SPIRA_SMOKERS_LUNG_CANCER_UP                          | SPIRA_SMOKERS_LUN   | 36  |
| SCHUETZ_BREAST_CANCER_DUCTAL_INVASIVE_DN              | SCHUETZ_BREAST_CAI  | 77  |
| REACTOME_FORMATION_OF_THE_HIV1_EARLY_ELONGATION_CC    | REACTOME_FORMATIK   | 26  |
| CHANG_CORE_SERUM_RESPONSE_UP                          | CHANG_CORE_SERUM    | 201 |
| PID_FANCONI_PATHWAY                                   | PID_FANCONI_PATHW   | 45  |
| GESERICK_TERT_TARGETS_DN                              | GESERICK_TERT_TARG  | 21  |
| REACTOME_DEADENYLATION_OF_MRNA                        | REACTOME_DEADENYI   | 18  |
| ZWANG_EGF_PERSISTENTLY_DN                             | ZWANG_EGF_PERSISTI  | 50  |
| CREIGHTON_ENDOCRINE_THERAPY_RESISTANCE_1              | CREIGHTON_ENDOCRI   | 468 |
| ZHAN_MULTIPLE_MYELOMA_SUBGROUPS                       | ZHAN_MULTIPLE_MYE   | 30  |
| KEGG_SYSTEMIC_LUPUS_ERYTHEMATOSUS                     | KEGG_SYSTEMIC_LUPL  | 91  |
| IVANOVA_HEMATOPOIESIS_LATE_PROGENITOR                 | IVANOVA_HEMATOPO    | 493 |
| WILLIAMS_ESR2_TARGETS_UP                              | WILLIAMS_ESR2_TARG  | 25  |
| SASAKI_ADULT_T_CELL_LEUKEMIA                          | SASAKI_ADULT_T_CELI | 163 |
| KEGG_TYPE_I_DIABETES_MELLITUS                         | KEGG_TYPE_I_DIABETI | 21  |
| HUMMERICH_BENIGN_SKIN_TUMOR_DN                        | HUMMERICH_BENIGN    | 18  |
| MARTENS_BOUND_BY_PML_RARA_FUSION                      | MARTENS_BOUND_BY    | 414 |
| REACTOME_FORMATION_OF_TRANSCRIPTION_COUPLED_NER_T     | REACTOME_FORMATIK   | 28  |
| PIONTEK_PKD1_TARGETS_UP                               | PIONTEK_PKD1_TARGI  | 32  |
| GARCIA_TARGETS_OF_FLI1_AND_DAX1_DN                    | GARCIA_TARGETS_OF   | 150 |
| STEIN_ESRRA_TARGETS                                   | STEIN_ESRRA_TARGET  | 468 |
| LANDIS_ERBB2_BREAST_TUMORS_65_UP                      | LANDIS_ERBB2_BREAS  | 21  |
| GRABARCZYK_BCL11B_TARGETS_UP                          | GRABARCZYK_BCL11B   | 67  |
| MORI_IMMATURE_B_LYMPHOCYTE_UP                         | MORI_IMMATURE_B_I   | 49  |
| SETLUR_PROSTATE_CANCER_TMPRSS2_ERG_FUSION_DN          | SETLUR_PROSTATE_CA  | 18  |
| REACTOME_HOMOLOGOUS_RECOMBINATION_REPAIR_OF_REPLI     | REACTOME_HOMOLOI    | 15  |
| MARTINEZ_RESPONSE_TO TRABECTEDIN_DN                   | MARTINEZ_RESPONSE   | 250 |
| LANDEMAINE_LUNG_METASTASIS                            | LANDEMAINE_LUNG_I   | 18  |
| REACTOME_RNA_POL_III_TRANSCRIPTION_INITIATION_FROM_TY | REACTOME_RNA_POL    | 25  |
| WINNEPENINCKX_MELANOMA_METASTASIS_UP                  | WINNEPENINCKX_MI    | 149 |
| GAVIN_FOXP3_TARGETS_CLUSTER_P6                        | GAVIN_FOXP3_TARGE   | 87  |
| ST_GA12_PATHWAY                                       | ST_GA12_PATHWAY     | 23  |
| HUTTMANN_B_CLL_POOR_SURVIVAL_DN                       | HUTTMANN_B_CLL_PC   | 53  |
| BHATI_G2M_ARREST_BY_2METHOXYESTRADIOL_UP              | BHATI_G2M_ARREST_I  | 109 |
| SA_CASPASE_CASCADE                                    | SA_CASPASE_CASCADE  | 17  |
| IKEDA_MIR30_TARGETS_DN                                | IKEDA_MIR30_TARGET  | 27  |

|                                                     |                     |     |
|-----------------------------------------------------|---------------------|-----|
| YANG_BREAST_CANCER_ESR1_LASER_UP                    | YANG_BREAST_CANCE   | 30  |
| JEON_SMAD6_TARGETS_DN                               | JEON_SMAD6_TARGET   | 18  |
| KEGG_ALDOSTERONE_REGULATED_SODIUM_REABSORPTION      | KEGG_ALDOSTERONE_   | 41  |
| RASHI_RESPONSE_TO_IONIZING_RADIATION_2              | RASHI_RESPONSE_TO_  | 124 |
| REACTOME_TRANS_GOLGI_NETWORK_VESICLE_BUDDING        | REACTOME_TRANS_G(   | 54  |
| SANA_RESPONSE_TO_IFNG_DN                            | SANA_RESPONSE_TO_   | 80  |
| TAVOR_CEBPA_TARGETS_DN                              | TAVOR_CEBPA_TARGE   | 26  |
| WALLACE_JAK2_TARGETS_UP                             | WALLACE_JAK2_TARG   | 24  |
| LI_WILMS_TUMOR_ANAPLASTIC_UP                        | LI_WILMS_TUMOR_AN   | 19  |
| SABATES_COLORECTAL_ADENOMA_UP                       | SABATES_COLORECTAI  | 117 |
| RIZ_ERYTHROID_DIFFERENTIATION_CCNE1                 | RIZ_ERYTHROID_DIFFE | 39  |
| BREDEMEYER_RAG_SIGNALING_NOT_VIA_ATM_DN             | BREDEMEYER_RAG_SI   | 53  |
| YAGI_AML_RELAPSE_PROGNOSIS                          | YAGI_AML_RELAPSE_F  | 34  |
| IRITANI_MAD1_TARGETS_DN                             | IRITANI_MAD1_TARGE  | 46  |
| HUMMEL_BURKITT'S_LYMPHOMA_UP                        | HUMMEL_BURKITT'S_L  | 36  |
| ZHOU_INFLAMMATORY_RESPONSE_FIMA_DN                  | ZHOU_INFLAMMATOR    | 228 |
| SHEPARD_CRUSH_AND_BURN_MUTANT_UP                    | SHEPARD_CRUSH_AND   | 177 |
| ABE_VEGFA_TARGETS                                   | ABE_VEGFA_TARGETS   | 19  |
| LAU_APOPTOSIS_CDKN2A_UP                             | LAU_APOPTOSIS_CDKI  | 51  |
| ST_GAQ_PATHWAY                                      | ST_GAQ_PATHWAY      | 27  |
| RIZ_ERYTHROID_DIFFERENTIATION_HBZ                   | RIZ_ERYTHROID_DIFFE | 40  |
| MAGRANGEAS_MULTIPLE_MYELOMA_IGG_VS_IGA_UP           | MAGRANGEAS_MULTI    | 19  |
| REACTOME_RNA_POL_III_TRANSCRIPTION                  | REACTOME_RNA_POL_   | 32  |
| MA_MYELOID_DIFFERENTIATION_DN                       | MA_MYELOID_DIFFERI  | 44  |
| REACTOME_MEIOTIC_SYNAPSIS                           | REACTOME_MEIOTIC_   | 58  |
| RAY_TUMORIGENESIS_BY_ERBB2_CDC25A_UP                | RAY_TUMORIGENESIS_  | 98  |
| KEGG_UBIQUITIN_MEDIATED_PROTEOLYSIS                 | KEGG_UBIQUITIN_MEI  | 129 |
| REACTOME_MITOTIC_M_M_G1_PHASES                      | REACTOME_MITOTIC_   | 166 |
| PID_FOXM1_PATHWAY                                   | PID_FOXM1_PATHWA    | 40  |
| BRACHAT_RESPONSE_TO_CAMPTOTHECIN_UP                 | BRACHAT_RESPONSE_   | 23  |
| JOHNSTONE_PARVB_TARGETS_2_DN                        | JOHNSTONE_PARVB_T   | 307 |
| MIKKELSEN_MCV6_LCP_WITH_H3K27ME3                    | MIKKELSEN_MCV6_LC   | 21  |
| PID_CONE_PATHWAY                                    | PID_CONE_PATHWAY    | 21  |
| BREDEMEYER_RAG_SIGNALING_VIA_ATM_NOT_VIA_NFKB_DN    | BREDEMEYER_RAG_SI   | 35  |
| XU_HGF_TARGETS_INDUCED_BY_AKT1_6HR                  | XU_HGF_TARGETS_INI  | 17  |
| GRAESSMANN_RESPONSE_TO_MC_AND_SERUM_DEPRIVATION_I   | GRAESSMANN_RESPOI   | 75  |
| LABBE_WNT3A_TARGETS_UP                              | LABBE_WNT3A_TARGE   | 107 |
| GUO_TARGETS_OF_IRS1_AND_IRS2                        | GUO_TARGETS_OF_IR   | 89  |
| REACTOME_GRB2_SOS_PROVIDES_LINKAGE_TO_MAPK_SIGNALIN | REACTOME_GRB2_SO    | 15  |
| NOUZOVA_TRETINOIN_AND_H4_ACETYLATION                | NOUZOVA_TRETINOIN   | 122 |
| STEARMAN_LUNG_CANCER_EARLY_VS_LATE_UP               | STEARMAN_LUNG_CA    | 115 |
| DANG_REGULATED_BY_MYC_UP                            | DANG_REGULATED_BY   | 64  |
| KEGG_CELL_CYCLE                                     | KEGG_CELL_CYCLE     | 121 |
| SWEET_LUNG_CANCER_KRAS_UP                           | SWEET_LUNG_CANCEF   | 453 |
| PEART_HDAC_PROLIFERATION_CLUSTER_DN                 | PEART_HDAC_PROLIFE  | 71  |
| MARKS_HDAC_TARGETS_UP                               | MARKS_HDAC_TARGE    | 18  |
| LANDIS_ERBB2_BREAST_TUMORS_324_UP                   | LANDIS_ERBB2_BREAS  | 138 |
| GEORGANTAS_HSC_MARKERS                              | GEORGANTAS_HSC_M    | 60  |
| GHANDHI_BYSTANDER_IRRADIATION_UP                    | GHANDHI_BYSTANDER   | 72  |
| REACTOME_CELL_DEATH_SIGNALLING_VIA_NRAGE_NRIF_AND_N | REACTOME_CELL_DEA   | 58  |



|                                                      |                     |     |
|------------------------------------------------------|---------------------|-----|
| STEIN_ESRRA_TARGETS_RESPONSIVE_TO_ESTROGEN_DN        | STEIN_ESRRA_TARGET  | 39  |
| MORI_IMMATURE_B_LYMPHOCYTE_DN                        | MORI_IMMATURE_B_L   | 88  |
| REACTOME_SHC_MEDIATED_CASCADE                        | REACTOME_SHC_MED    | 26  |
| GINESTIER_BREAST_CANCER_ZNF217_AMPLIFIED_DN          | GINESTIER_BREAST_CA | 290 |
| SARTIPY_NORMAL_AT_INSULIN_RESISTANCE_UP              | SARTIPY_NORMAL_AT   | 33  |
| REACTOME_INTRINSIC_PATHWAY_FOR_APOPTOSIS             | REACTOME_INTRINSIC  | 28  |
| PEDERSEN_METASTASIS_BY_ERBB2_ISOFORM_6               | PEDERSEN_METASTAS   | 26  |
| YAO_TEMPORAL_RESPONSE_TO_PROGESTERONE_CLUSTER_5      | YAO_TEMPORAL_RESP   | 28  |
| MCBRYAN_PUBERTAL_BREAST_5_6WK_UP                     | MCBRYAN_PUBERTAL_   | 110 |
| PID_IL23_PATHWAY                                     | PID_IL23_PATHWAY    | 37  |
| WINTER_HYPOXIA_UP                                    | WINTER_HYPOXIA_UP   | 85  |
| KEGG_RNA_POLYMERASE                                  | KEGG_RNA_POLYMER    | 27  |
| GRABARCZYK_BCL11B_TARGETS_DN                         | GRABARCZYK_BCL11B_  | 52  |
| GEISS_RESPONSE_TO_DSRNA_UP                           | GEISS_RESPONSE_TO_  | 35  |
| ST_T_CELL_SIGNAL_TRANSDUCTION                        | ST_T_CELL_SIGNAL_TR | 45  |
| GROSS_ELK3_TARGETS_DN                                | GROSS_ELK3_TARGETS  | 32  |
| SAGIV_CD24_TARGETS_UP                                | SAGIV_CD24_TARGETS  | 21  |
| REACTOME_PYRUVATE_METABOLISM_AND_CITRIC_ACID_TCA_C   | REACTOME_PYRUVATI   | 39  |
| REACTOME_ORC1_REMOVAL_FROM_CHROMATIN                 | REACTOME_ORC1_REI   | 65  |
| PID_MYC_ACTIV_PATHWAY                                | PID_MYC_ACTIV_PATH  | 77  |
| GARGALOVIC_RESPONSE_TO_OXIDIZED_PHOSPHOLIPIDS_YELLOW | GARGALOVIC_RESPON   | 25  |
| MIKKELSEN_ES_ICP_WITH_H3K27ME3                       | MIKKELSEN_ES_ICP_W  | 40  |
| GOTZMANN_EPITHELIAL_TO_MESENCHYMAL_TRANSITION_DN     | GOTZMANN_EPITHELI   | 196 |
| KEGG_VEGF_SIGNALING_PATHWAY                          | KEGG_VEGF_SIGNALIN  | 73  |
| REACTOME_RNA_POL_II_TRANSCRIPTION                    | REACTOME_RNA_POL_   | 91  |
| MORI_LARGE_PRE_BII_LYMPHOCYTE_UP                     | MORI_LARGE_PRE_BII_ | 81  |
| REACTOME_AMINO_ACID_SYNTHESIS_AND_INTERCONVERSION_   | REACTOME_AMINO_A    | 16  |
| HOLLERN_SQUAMOUS_BREAST_TUMOR                        | HOLLERN_SQUAMOUS    | 111 |
| DORN_ADENOVIRUS_INFECTION_12HR_DN                    | DORN_ADENOVIRUS_I   | 33  |
| RATTENBACHER_BOUND_BY_CELF1                          | RATTENBACHER_BOUH   | 361 |
| AIGNER_ZEB1_TARGETS                                  | AIGNER_ZEB1_TARGET  | 34  |
| FARMER_BREAST_CANCER_CLUSTER_7                       | FARMER_BREAST_CAN   | 18  |
| SCHLOSSER_MYC_TARGETS_AND_SERUM_RESPONSE_DN          | SCHLOSSER_MYC_TAR   | 46  |
| DAIRKEE_TERT_TARGETS_UP                              | DAIRKEE_TERT_TARGE  | 329 |
| WANG_CISPLATIN_RESPONSE_AND_XPC_UP                   | WANG_CISPLATIN_RES  | 183 |
| XU_CREBBP_TARGETS_UP                                 | XU_CREBBP_TARGETS_  | 24  |
| HEIDENBLAD_AMPLICON_8Q24_DN                          | HEIDENBLAD_AMPLIC   | 42  |
| REACTOME_FANCONI_ANEMIA_PATHWAY                      | REACTOME_FANCONI_   | 19  |
| PID_ERA_GENOMIC_PATHWAY                              | PID_ERA_GENOMIC_P   | 64  |
| REACTOME_SIGNALING_BY_THE_B_CELL_RECEPTOR_BCR        | REACTOME_SIGNALIN   | 119 |
| SHEDDEN_LUNG_CANCER_POOR_SURVIVAL_A6                 | SHEDDEN_LUNG_CAN    | 422 |
| BEIER_GLIOMA_STEM_CELL_DN                            | BEIER_GLIOMA_STEM_  | 53  |
| BROWNE_HCMV_INFECTION_6HR_DN                         | BROWNE_HCMV_INFE    | 146 |
| YAO_TEMPORAL_RESPONSE_TO_PROGESTERONE_CLUSTER_6      | YAO_TEMPORAL_RESP   | 67  |
| PID_CD40_PATHWAY                                     | PID_CD40_PATHWAY    | 30  |
| BROWNE_HCMV_INFECTION_10HR_UP                        | BROWNE_HCMV_INFE    | 86  |
| RASHI_RESPONSE_TO_IONIZING_RADIATION_3               | RASHI_RESPONSE_TO_  | 45  |
| FARMER_BREAST_CANCER_BASAL_VS_LULMINAL               | FARMER_BREAST_CAN   | 304 |
| ONO_FOXP3_TARGETS_DN                                 | ONO_FOXP3_TARGETS   | 39  |
| RODWELL_AGING_KIDNEY_DN                              | RODWELL_AGING_KID   | 125 |

|                                                    |                     |     |
|----------------------------------------------------|---------------------|-----|
| ODONNELL_TFRC_TARGETS_DN                           | ODONNELL_TFRC_TAR   | 120 |
| KEGG_FC_EPSILON_RI_SIGNALING_PATHWAY               | KEGG_FC_EPSILON_RI  | 77  |
| REACTOME_APOPTOTIC_EXECUTION_PHASE                 | REACTOME_APOPTOTI   | 49  |
| KEGG_ARGININE_AND_PROLINE_METABOLISM               | KEGG_ARGININE_AND   | 51  |
| CHESLER_BRAIN_HIGHEST_EXPRESSION                   | CHESLER_BRAIN_HIGH  | 37  |
| DALESSIO_TSA_RESPONSE                              | DALESSIO_TSA_RESPO  | 20  |
| KEGG_DORSO_VENTRAL_AXIS_FORMATION                  | KEGG_DORSO_VENTRA/  | 22  |
| KEGG_REGULATION_OF_AUTOPHAGY                       | KEGG_REGULATION_O   | 28  |
| JIANG_VHL_TARGETS                                  | JIANG_VHL_TARGETS   | 122 |
| GENTILE_UV_RESPONSE_CLUSTER_D4                     | GENTILE_UV_RESPONS  | 51  |
| REACTOME_ABORTIVE_ELONGATION_OF_HIV1_TRANSCRIPT_IN | REACTOME_ABORTIVE   | 17  |
| REN_ALVEOLAR_RHABDOMYOSARCOMA_UP                   | REN_ALVEOLAR_RHAB   | 96  |
| APPIERTO_RESPONSE_TO_FENRETINIDE_UP                | APPIERTO_RESPONSE_  | 35  |
| MULLIGHAN_NPM1_MUTATED_SIGNATURE_2_DN              | MULLIGHAN_NPM1_M    | 72  |
| MARKEY_RB1_ACUTE_LOF_UP                            | MARKEY_RB1_ACUTE_   | 219 |
| BECKER_TAMOXIFEN_RESISTANCE_DN                     | BECKER_TAMOXIFEN_   | 48  |
| SIG_CD40PATHWAYMAP                                 | SIG_CD40PATHWAYM/   | 34  |
| MAYBURD_RESPONSE_TO_L663536_DN                     | MAYBURD_RESPONSE_   | 48  |
| LY_AGING_PREMATURE_DN                              | LY_AGING_PREMATUR   | 29  |
| BIOCARTA_PITX2_PATHWAY                             | BIOCARTA_PITX2_PATI | 15  |
| CHARAFE_BREAST_CANCER_LUMINAL_VS_MESENCHYMAL_UP    | CHARAFE_BREAST_CAI  | 393 |
| VANASSE_BCL2_TARGETS_UP                            | VANASSE_BCL2_TARGI  | 35  |
| HALMOS_CEBPA_TARGETS_DN                            | HALMOS_CEBPA_TARC   | 43  |
| STAMBOLSKY_BOUND_BY_MUTATED_TP53                   | STAMBOLSKY_BOUND_   | 15  |
| ST_PHOSPHOINOSITIDE_3_KINASE_PATHWAY               | ST_PHOSPHOINOSITID  | 37  |
| MOHANKUMAR_HOXA1_TARGETS_UP                        | MOHANKUMAR_HOXA     | 385 |
| XU_RESPONSE_TO_TRETINOIN_AND_NSC682994_DN          | XU_RESPONSE_TO_TR   | 15  |
| REACTOME_PREFOLDIN_MEDIATED_TRANSFER_OF_SUBSTRATE  | REACTOME_PREFOLDI   | 24  |
| HORIUCHI_WTAP_TARGETS_DN                           | HORIUCHI_WTAP_TAR   | 287 |
| ZWANG_CLASS_1_TRANSIENTLY_INDUCED_BY_EGF           | ZWANG_CLASS_1_TRA   | 454 |
| HIRSCH_CELLULAR_TRANSFORMATION_SIGNATURE_UP        | HIRSCH_CELLULAR_TR  | 224 |
| GOLDRATH_HOMEOSTATIC_PROLIFERATION                 | GOLDRATH_HOMEOST    | 158 |
| KYNG_DNA_DAMAGE_BY_UV                              | KYNG_DNA_DAMAGE_    | 60  |
| BROWNE_HCMV_INFECTION_30MIN_DN                     | BROWNE_HCMV_INFE    | 130 |
| REACTOME_BILE_ACID_AND_BILE_SALT_METABOLISM        | REACTOME_BILE_ACID  | 23  |
| GAZDA_DIAMOND_BLACKFAN_ANEMIA_PROGENITOR_UP        | GAZDA_DIAMOND_BL    | 33  |
| NIKOLSKY_BREAST_CANCER_16P13_AMPLICON              | NIKOLSKY_BREAST_CA  | 100 |
| PENG_RAPAMYCIN_RESPONSE_DN                         | PENG_RAPAMYCIN_RE   | 229 |
| SCIAN_CELL_CYCLE_TARGETS_OF_TP53_AND_TP73_DN       | SCIAN_CELL_CYCLE_TA | 22  |
| PID_NEPHRIN_NEPH1_PATHWAY                          | PID_NEPHRIN_NEPH1_  | 31  |
| KEGG_P53_SIGNALING_PATHWAY                         | KEGG_P53_SIGNALING  | 62  |
| FLECHNER_PBL_KIDNEY_TRANSPLANT_OK_VS_DONOR_UP      | FLECHNER_PBL_KIDNE  | 140 |
| TIMOFEEVA_GROWTH_STRESS_VIA_STAT1_DN               | TIMOFEEVA_GROWTH    | 15  |
| MULLIGAN_NTF3_SIGNALING_VIA_INSR_AND_IGF1R_UP      | MULLIGAN_NTF3_SIGI  | 23  |
| PAPASPYRIDONOS_UNSTABLE_ATEROSCLEROTIC_PLAQUE_UP   | PAPASPYRIDONOS_UN   | 47  |
| GROSS_HYPOXIA_VIA_ELK3_AND_HIF1A_UP                | GROSS_HYPOXIA_VIA_  | 137 |
| BIOCARTA_AKT_PATHWAY                               | BIOCARTA_AKT_PATH   | 20  |
| GREENBAUM_E2A_TARGETS_DN                           | GREENBAUM_E2A_TAI   | 19  |
| PID_ATM_PATHWAY                                    | PID_ATM_PATHWAY     | 33  |
| PEDERSEN_METASTASIS_BY_ERBB2_ISOFORM_7             | PEDERSEN_METASTAS   | 341 |

|                                                     |                      |     |
|-----------------------------------------------------|----------------------|-----|
| JAZAG_TGFB1_SIGNALING_UP                            | JAZAG_TGFB1_SIGNAL   | 100 |
| BOYLAN_MULTIPLE_MYELOMA_C_CLUSTER_DN                | BOYLAN_MULTIPLE_M    | 29  |
| MILI_PSEUDOPODIA_HAPTOTAXIS_UP                      | MILI_PSEUDOPODIA_F   | 468 |
| REACTOME_DOWNSTREAM_SIGNALING_EVENTS_OF_B_CELL_RE   | REACTOME_DOWNSTN     | 90  |
| BIOCARTA_P53HYPOXIA_PATHWAY                         | BIOCARTA_P53HYPOXI   | 20  |
| QUINTENS_EMBRYONIC_BRAIN_RESPONSE_TO_IR             | QUINTENS_EMBRYONI    | 69  |
| BANDRES_RESPONSE_TO_CARMUSTIN_MGMT_48HR_DN          | BANDRES_RESPONSE_    | 150 |
| HESS_TARGETS_OF_HOXA9_AND_MEIS1_UP                  | HESS_TARGETS_OF_HC   | 64  |
| GARGALOVIC_RESPONSE_TO_OXIDIZED_PHOSPHOLIPIDS_TURQU | GARGALOVIC_RESPON    | 46  |
| GOLUB_ALL_VS_AML_UP                                 | GOLUB_ALL_VS_AML_    | 23  |
| REACTOME_FORMATION_OF_RNA_POL_II_ELONGATION_COMPL   | REACTOME_FORMATI     | 35  |
| PID_THROMBIN_PAR4_PATHWAY                           | PID_THROMBIN_PAR4    | 15  |
| GRAHAM_CML_DIVIDING_VS_NORMAL_QUIESCENT_UP          | GRAHAM_CML_DIVIDI    | 171 |
| WHITFIELD_CELL_CYCLE_G2_M                           | WHITFIELD_CELL_CYCL  | 203 |
| GENTILE_UV_RESPONSE_CLUSTER_D2                      | GENTILE_UV_RESPONS   | 39  |
| SCHEIDEREIT_IKK_INTERACTING_PROTEINS                | SCHEIDEREIT_IKK_INTE | 58  |
| REACTOME_CELL_CYCLE_CHECKPOINTS                     | REACTOME_CELL_CYCI   | 110 |
| WATANABE_COLON_CANCER_MSI_VS_MSS_UP                 | WATANABE_COLON_C     | 25  |
| OUELLET_OVARIAN_CANCER_INVASIVE_VS_LMP_UP           | OUELLET_OVARIAN_C/   | 112 |
| REACTOME_PKA_MEDIATED_PHOSPHORYLATION_OF_CREB       | REACTOME_PKA_MED     | 16  |
| WONG_EMBRYONIC_STEM_CELL_CORE                       | WONG_EMBRYONIC_S     | 326 |
| CHIARETTI_T_ALL_REFRACTORY_TO_THERAPY               | CHIARETTI_T_ALL_REF  | 28  |
| YOKOE_CANCER_TESTIS_ANTIGENS                        | YOKOE_CANCER_TESTI   | 31  |
| CAFFAREL_RESPONSE_TO_THC_24HR_5_UP                  | CAFFAREL_RESPONSE_   | 30  |
| LASTOWSKA_COAMPLIFIED_WITH_MYCN                     | LASTOWSKA_COAMPL     | 38  |
| KYNG_NORMAL_AGING_UP                                | KYNG_NORMAL_AGIN     | 15  |
| HASLINGER_B_CLL_WITH_17P13_DELETION                 | HASLINGER_B_CLL_WI   | 19  |
| REACTOME_SIGNALING_BY_WNT                           | REACTOME_SIGNALIN    | 61  |
| REACTOME_MRNA_3_END_PROCESSING                      | REACTOME_MRNA_3_     | 33  |
| HUNSBERGER_EXERCISE_REGULATED_GENES                 | HUNSBERGER_EXERCIS   | 31  |
| CHEOK_RESPONSE_TO_MERCAPTOPURINE_AND_LD_MTX_DN      | CHEOK_RESPONSE_TO    | 17  |
| XU_GH1_AUTOCRINE_TARGETS_UP                         | XU_GH1_AUTOCRINE_    | 216 |
| FRASOR_RESPONSE_TO ESTRADIOL_DN                     | FRASOR_RESPONSE_TI   | 76  |
| BOYLAN_MULTIPLE_MYELOMA_D_CLUSTER_UP                | BOYLAN_MULTIPLE_M    | 27  |
| HOLLEMAN_PREDNISOLONE_RESISTANCE_B_ALL_UP           | HOLLEMAN_PREDNISC    | 20  |
| ZHAN_MULTIPLE_MYELOMA_CD1_UP                        | ZHAN_MULTIPLE_MYE    | 43  |
| PID_LYSOPHOSPHOLIPID_PATHWAY                        | PID_LYSOPHOSPHOLIP   | 65  |
| GAVIN_PDE3B_TARGETS                                 | GAVIN_PDE3B_TARGE    | 20  |
| BIOCARTA_TOLL_PATHWAY                               | BIOCARTA_TOLL_PATH   | 36  |
| BARRIER_CANCER_RELAPSE_NORMAL_SAMPLE_UP             | BARRIER_CANCER_REL   | 29  |
| PID_FAS_PATHWAY                                     | PID_FAS_PATHWAY      | 36  |
| LINSLEY_MIR16_TARGETS                               | LINSLEY_MIR16_TARG   | 191 |
| PID_CDC42_PATHWAY                                   | PID_CDC42_PATHWAY    | 67  |
| NATSUME_RESPONSE_TO_INTERFERON_BETA_DN              | NATSUME_RESPONSE_    | 48  |
| REACTOME_SIGNALING_BY_INSULIN_RECEPTOR              | REACTOME_SIGNALIN    | 101 |
| HASLINGER_B_CLL_WITH_MUTATED_VH_GENES               | HASLINGER_B_CLL_WI   | 16  |
| GINESTIER_BREAST_CANCER_20Q13_AMPLIFICATION_DN      | GINESTIER_BREAST_C/  | 147 |
| KEGG_NON_SMALL_CELL_LUNG_CANCER                     | KEGG_NON_SMALL_CI    | 52  |
| HELLER_SILENCED_BY_METHYLATION_DN                   | HELLER_SILENCED_BY_  | 96  |
| MYLLYKANGAS_AMPLIFICATION_HOT_SPOT_17               | MYLLYKANGAS_AMPLI    | 17  |

|                                                    |                     |     |
|----------------------------------------------------|---------------------|-----|
| SEIDEN_MET_SIGNALING                               | SEIDEN_MET_SIGNALII | 18  |
| ZHU_CMV_24_HR_UP                                   | ZHU_CMV_24_HR_UP    | 87  |
| WONG_PROTEASOME_GENE_MODULE                        | WONG_PROTEASOME     | 47  |
| MCLACHLAN_DENTAL_CARIES_UP                         | MCLACHLAN_DENTAL_   | 202 |
| AMUNDSON_GAMMA_RADIATION_RESPONSE                  | AMUNDSON_GAMMA      | 39  |
| REACTOME_APOPTOSIS                                 | REACTOME_APOPTOSI   | 137 |
| REACTOME_SCFSKP2_MEDIATED_DEGRADATION_OF_P27_P21   | REACTOME_SCFSKP2_   | 52  |
| HEIDENBLAD_AMPLICON_12P11_12_UP                    | HEIDENBLAD_AMPLIC   | 32  |
| BIOCARTA_GATA3_PATHWAY                             | BIOCARTA_GATA3_PA   | 15  |
| REACTOME_DOWNSTREAM_TCR_SIGNALING                  | REACTOME_DOWNSTF    | 27  |
| SHARMA_PILOCYTIC_ASTROCYTOMA_LOCATION_UP           | SHARMA_PILOCYTIC_A  | 22  |
| LIU_CMYB_TARGETS_UP                                | LIU_CMYB_TARGETS_U  | 143 |
| PID_SMAD2_3NUCLEAR_PATHWAY                         | PID_SMAD2_3NUCLEA   | 81  |
| YE_METASTATIC_LIVER_CANCER                         | YE_METASTATIC_LIVEF | 21  |
| RHODES_UNDIFFERENTIATED_CANCER                     | RHODES_UNDIFFEREN   | 66  |
| KIM_RESPONSE_TO_TSA_AND_DECITABINE_UP              | KIM_RESPONSE_TO_T:  | 117 |
| ZHANG_RESPONSE_TO_IKK_INHIBITOR_AND_TNF_UP         | ZHANG_RESPONSE_TC   | 199 |
| REACTOME_REGULATION_OF_SIGNALING_BY_CBL            | REACTOME_REGULATI   | 18  |
| REACTOME_PI3K_CASCADE                              | REACTOME_PI3K_CASI  | 66  |
| KYNG_WERNER_SYNDROM_AND_NORMAL_AGING_UP            | KYNG_WERNER_SYND    | 84  |
| ZHENG_GLIOMASTOMA_PLASTICITY_UP                    | ZHENG_GLIOMASTOM    | 234 |
| BIOCARTA_CARM_ER_PATHWAY                           | BIOCARTA_CARM_ER_   | 34  |
| DARWICHE_SKIN_TUMOR_PROMOTER_UP                    | DARWICHE_SKIN_TUM   | 125 |
| GROSS_HYPOXIA_VIA_ELK3_DN                          | GROSS_HYPOXIA_VIA_  | 148 |
| REACTOME_IMMUNOREGULATORY_INTERACTIONS_BETWEEN_A   | REACTOME_IMMUNOI    | 44  |
| HILLION_HMGA1B_TARGETS                             | HILLION_HMGA1B_TA   | 88  |
| BIOCARTA_GSK3_PATHWAY                              | BIOCARTA_GSK3_PATH  | 27  |
| OKAMOTO_LIVER_CANCER_MULTICENTRIC_OCCURRENCE_UP    | OKAMOTO_LIVER_CAN   | 22  |
| HOFFMANN_LARGE_TO_SMALL_PRE_BII_LYMPHOCYTE_UP      | HOFFMANN_LARGE_TI   | 153 |
| REACTOME_AQUAPORIN_MEDIATED_TRANSPORT              | REACTOME_AQUAPOF    | 48  |
| WANG_BARRETTS_ESOPHAGUS_UP                         | WANG_BARRETTS_ESC   | 44  |
| BURTON_ADIPOGENESIS_PEAK_AT_24HR                   | BURTON_ADIPOGENES   | 41  |
| ROME_INSULIN_TARGETS_IN_MUSCLE_DN                  | ROME_INSULIN_TARG   | 158 |
| BROWNE_HCMV_INFECTION_8HR_DN                       | BROWNE_HCMV_INFE    | 43  |
| MATTIOLI_MGUS_VS_PCL                               | MATTIOLI_MGUS_VS_   | 95  |
| REACTOME_CDT1_ASSOCIATION_WITH_THE_CDC6_ORC_ORIGIN | REACTOME_CDT1_ASS   | 54  |
| KEGG_CYSTEINE_AND_METHIONINE_METABOLISM            | KEGG_CYSTEINE_AND_  | 33  |
| DAIRKEE_CANCER_PRONE_RESPONSE_E2                   | DAIRKEE_CANCER_PRC  | 28  |
| CHEMELLO_SOLEUS_VS_EDL_MYOFIBERS_UP                | CHEMELLO_SOLEUS_V   | 34  |
| REACTOME_ION_TRANSPORT_BY_P_TYPE_ATPASES           | REACTOME_ION_TRAN   | 33  |
| BANDRES_RESPONSE_TO_CARMUSTIN_WITHOUT_MGMT_48HR    | BANDRES_RESPONSE_   | 29  |
| REACTOME_REGULATORY_RNA_PATHWAYS                   | REACTOME_REGULATO   | 25  |
| WEST_ADRENOCORTICAL_CARCINOMA_VS_ADENOMA_UP        | WEST_ADRENOCORTIC   | 19  |
| REACTOME_SYNTHESIS_OF_PIPS_AT_THE_PLASMA_MEMBRANE  | REACTOME_SYNTHESI   | 30  |
| SASSON_RESPONSE_TO_FORSKOLIN_UP                    | SASSON_RESPONSE_TO  | 86  |
| LINDSTEDT_DENDRITIC_CELL_MATURATION_A              | LINDSTEDT_DENDRITIC | 63  |
| PURBEY_TARGETS_OF_CTBP1_AND_SATB1_DN               | PURBEY_TARGETS_OF_  | 166 |
| TAKEDA_TARGETS_OF_NUP98_HOXA9_FUSION_3D_DN         | TAKEDA_TARGETS_OF_  | 27  |
| REACTOME_REGULATION_OF_KIT_SIGNALING               | REACTOME_REGULATI   | 15  |
| HUPER_BREAST_BASAL_VS_LUMINAL_UP                   | HUPER_BREAST_BASA   | 45  |

|                                                             |                                                             |     |
|-------------------------------------------------------------|-------------------------------------------------------------|-----|
| REACTOME_DARPP_32_EVENTS                                    | REACTOME_DARPP_32_EVENTS                                    | 23  |
| REACTOME_REGULATION_OF_BETA_CELL_DEVELOPMENT                | REACTOME_REGULATION_OF_BETA_CELL_DEVELOPMENT                | 29  |
| KEGG_GLYCOSYLPHOSPHATIDYLINOSITOL_GPI_ANCHOR_BIOSYNTHESIS   | KEGG_GLYCOSYLPHOSPHATIDYLINOSITOL_GPI_ANCHOR_BIOSYNTHESIS   | 24  |
| NADLER_HYPERGLYCEMIA_AT_OBESITY                             | NADLER_HYPERGLYCEMIA_AT_OBESITY                             | 57  |
| NAM_FXYD5_TARGETS_DN                                        | NAM_FXYD5_TARGETS_DN                                        | 18  |
| KIM_ALL_DISORDERS_OLIGODENDROCYTE_NUMBER_CORR_DN            | KIM_ALL_DISORDERS_OLIGODENDROCYTE_NUMBER_CORR_DN            | 28  |
| REACTOME_APOPTOTIC_CLEAVAGE_OF_CELLULAR_PROTEINS            | REACTOME_APOPTOTIC_CLEAVAGE_OF_CELLULAR_PROTEINS            | 35  |
| WORSCHER_TUMOR_EVASION_AND_TUMORIGENICITY_UP                | WORSCHER_TUMOR_EVASION_AND_TUMORIGENICITY_UP                | 30  |
| REACTOME_PROCESSING_OF_CAPPED_INTRONLESS_PRE_MRNA           | REACTOME_PROCESSING_OF_CAPPED_INTRONLESS_PRE_MRNA           | 22  |
| BROWNE_HCMV_INFECTION_8HR_UP                                | BROWNE_HCMV_INFECTION_8HR_UP                                | 90  |
| VANTVEER_BREAST_CANCER_ESR1_DN                              | VANTVEER_BREAST_CANCER_ESR1_DN                              | 219 |
| WAMUNYOKOLI_OVARIAN_CANCER_GRADES_1_2_UP                    | WAMUNYOKOLI_OVARIAN_CANCER_GRADES_1_2_UP                    | 125 |
| WINZEN_DEGRADED_VIA_KHSRP                                   | WINZEN_DEGRADED_VIA_KHSRP                                   | 97  |
| REACTOME_ACYL_CHAIN_REMODELLING_OF_PI                       | REACTOME_ACYL_CHAIN_REMODELLING_OF_PI                       | 15  |
| KANG_FLUOROURACIL_RESISTANCE_UP                             | KANG_FLUOROURACIL_RESISTANCE_UP                             | 21  |
| REACTOME_NRAGE_SIGNALS_DEATH_THROUGH_JNK                    | REACTOME_NRAGE_SIGNALS_DEATH_THROUGH_JNK                    | 43  |
| REACTOME_INTERACTION_BETWEEN_L1_AND_ANKYRINS                | REACTOME_INTERACTION_BETWEEN_L1_AND_ANKYRINS                | 19  |
| KEGG_PRIMARY_BILE_ACID_BIOSYNTHESIS                         | KEGG_PRIMARY_BILE_ACID_BIOSYNTHESIS                         | 15  |
| REACTOME_RNA_POL_III_TRANSCRIPTION_INITIATION_FROM_TYROSINE | REACTOME_RNA_POL_III_TRANSCRIPTION_INITIATION_FROM_TYROSINE | 23  |
| PODAR_RESPONSE_TO_ADAPHOSTIN_UP                             | PODAR_RESPONSE_TO_ADAPHOSTIN_UP                             | 131 |
| LIANG_SILENCED_BY_METHYLATION_2                             | LIANG_SILENCED_BY_METHYLATION_2                             | 47  |
| MAEKAWA_ATF2_TARGETS                                        | MAEKAWA_ATF2_TARGETS                                        | 24  |
| BORLAK_LIVER_CANCER_EGF_UP                                  | BORLAK_LIVER_CANCER_EGF_UP                                  | 53  |
| RAO_BOUND_BY_SALL4                                          | RAO_BOUND_BY_SALL4                                          | 203 |
| RODRIGUES_NTN1_TARGETS_DN                                   | RODRIGUES_NTN1_TARGETS_DN                                   | 143 |
| REACTOME_PROTEIN_FOLDING                                    | REACTOME_PROTEIN_FOLDING                                    | 48  |
| DELASERNA_MYOD_TARGETS_UP                                   | DELASERNA_MYOD_TARGETS_UP                                   | 85  |
| KIM_MYCN_AMPLIFICATION_TARGETS_UP                           | KIM_MYCN_AMPLIFICATION_TARGETS_UP                           | 85  |
| HANN_RESISTANCE_TO_BCL2_INHIBITOR_UP                        | HANN_RESISTANCE_TO_BCL2_INHIBITOR_UP                        | 28  |
| MIKKELSEN_MEF_ICP_WITH_H3K27ME3                             | MIKKELSEN_MEF_ICP_WITH_H3K27ME3                             | 182 |
| MACLACHLAN_BRCA1_TARGETS_UP                                 | MACLACHLAN_BRCA1_TARGETS_UP                                 | 21  |
| MOOTHA_VOXPHOS                                              | MOOTHA_VOXPHOS                                              | 83  |
| KUMAR_PATHOGEN_LOAD_BY_MACROPHAGES                          | KUMAR_PATHOGEN_LOAD_BY_MACROPHAGES                          | 216 |
| ANDERSEN_CHOLANGIOCARCINOMA_CLASS1                          | ANDERSEN_CHOLANGIOCARCINOMA_CLASS1                          | 53  |
| LEE_LIVER_CANCER_SURVIVAL_DN                                | LEE_LIVER_CANCER_SURVIVAL_DN                                | 162 |
| GROSS_HYPOXIA_VIA_ELK3_AND_HIF1A_DN                         | GROSS_HYPOXIA_VIA_ELK3_AND_HIF1A_DN                         | 101 |
| REACTOME_FORMATION_OF_TUBULIN_FOLDING_INTERMEDIATE          | REACTOME_FORMATION_OF_TUBULIN_FOLDING_INTERMEDIATE          | 19  |
| PARK_HSC_VS_MULTIPOTENT_PROGENITORS_DN                      | PARK_HSC_VS_MULTIPOTENT_PROGENITORS_DN                      | 18  |
| REACTOME_ACTIVATION_OF_NF_KAPPAB_IN_B_CELLS                 | REACTOME_ACTIVATION_OF_NF_KAPPAB_IN_B_CELLS                 | 60  |
| REACTOME_SIGNALING_BY_FGFR1_MUTANTS                         | REACTOME_SIGNALING_BY_FGFR1_MUTANTS                         | 28  |
| BOYALT_LIVER_CANCER_SUBCLASS_G123_DN                        | BOYALT_LIVER_CANCER_SUBCLASS_G123_DN                        | 49  |
| PID_IL2_PI3K_PATHWAY                                        | PID_IL2_PI3K_PATHWAY                                        | 34  |
| CAFFAREL_RESPONSE_TO_THC_DN                                 | CAFFAREL_RESPONSE_TO_THC_DN                                 | 26  |
| GARY_CD5_TARGETS_DN                                         | GARY_CD5_TARGETS_DN                                         | 404 |
| KYNG_DNA_DAMAGE_BY_4NQO                                     | KYNG_DNA_DAMAGE_BY_4NQO                                     | 31  |
| GROSS_HYPOXIA_VIA_HIF1A_UP                                  | GROSS_HYPOXIA_VIA_HIF1A_UP                                  | 76  |
| BYSTROEM_CORRELATED_WITH_IL5_DN                             | BYSTROEM_CORRELATED_WITH_IL5_DN                             | 60  |
| BASSO_CD40_SIGNALING_UP                                     | BASSO_CD40_SIGNALING_UP                                     | 92  |
| ZHAN_V2_LATE_DIFFERENTIATION_GENES                          | ZHAN_V2_LATE_DIFFERENTIATION_GENES                          | 41  |
| WU_HBX_TARGETS_3_UP                                         | WU_HBX_TARGETS_3_UP                                         | 18  |

|                                                     |                      |     |
|-----------------------------------------------------|----------------------|-----|
| RODRIGUES_THYROID_CARCCINOMA_DN                     | RODRIGUES_THYROID_   | 66  |
| JEPSEN_SMRT_TARGETS                                 | JEPSEN_SMRT_TARGET   | 32  |
| YAO_TEMPORAL_RESPONSE_TO_PROGESTERONE_CLUSTER_2     | YAO_TEMPORAL_RESP    | 79  |
| REACTOME_RNA_POL_III_CHAIN_ELONGATION               | REACTOME_RNA_POL_    | 17  |
| PRAMOONJAGO_SOX4_TARGETS_UP                         | PRAMOONJAGO_SOX4     | 51  |
| PYEON_CANCER_HEAD_AND_NECK_VS_CERVICAL_DN           | PYEON_CANCER_HEAL    | 23  |
| NICK_RESPONSE_TO_PROC_TREATMENT_DN                  | NICK_RESPONSE_TO_F   | 22  |
| ZHONG_SECRETOME_OF_LUNG_CANCER_AND_MACROPHAGE       | ZHONG_SECRETOME_ (   | 76  |
| JAEGER_METASTASIS_DN                                | JAEGER_METASTASIS_   | 229 |
| ANDERSEN_CHOLANGIOCARCINOMA_CLASS2                  | ANDERSEN_CHOLANGI    | 156 |
| REACTOME_GLUCOSE_TRANSPORT                          | REACTOME_GLUCOSE_    | 38  |
| BIOCARTA_TALL1_PATHWAY                              | BIOCARTA_TALL1_PAT   | 15  |
| KEGG_PURINE_METABOLISM                              | KEGG_PURINE_METAB    | 153 |
| BIOCARTA_P53_PATHWAY                                | BIOCARTA_P53_PATHV   | 15  |
| DAIRKEE_TERT_TARGETS_DN                             | DAIRKEE_TERT_TARGE   | 103 |
| PID_REG_GR_PATHWAY                                  | PID_REG_GR_PATHWA    | 78  |
| BRUINS_UVC_RESPONSE_VIA_TP53_GROUP_D                | BRUINS_UVC_RESPON    | 252 |
| LEIN_CEREBELLUM_MARKERS                             | LEIN_CEREBELLUM_M.   | 78  |
| REACTOME_REGULATION_OF_ORNITHINE_DECARBOXYLASE_ODC  | REACTOME_REGULATI    | 48  |
| DACOSTA_LOW_DOSE_UV_RESPONSE_VIA_ERCC3_XPCS_UP      | DACOSTA_LOW_DOSE     | 16  |
| LI_WILMS_TUMOR_VS_FETAL_KIDNEY_2_UP                 | LI_WILMS_TUMOR_VS    | 30  |
| BOYALT_LIVER_CANCER_SUBCLASS_G123_UP                | BOYALT_LIVER_CANC    | 43  |
| REACTOME_TCR_SIGNALING                              | REACTOME_TCR_SIGN    | 44  |
| GRAHAM_CML_QUIESCENT_VS_NORMAL_DIVIDING_UP          | GRAHAM_CML_QUIES     | 50  |
| REACTOME_ACTIVATION_OF_BH3_ONLY_PROTEINS            | REACTOME_ACTIVATIC   | 15  |
| BORCZUK_MALIGNANT_MESOTHELIOMA_UP                   | BORCZUK_MALIGNAN     | 284 |
| NUMATA_CSF3_SIGNALING_VIA_STAT3                     | NUMATA_CSF3_SIGNA    | 21  |
| PENG_Glutamine_Deprivation_DN                       | PENG_Glutamine_De    | 320 |
| REACTOME_Cyclin_E_Associated_Events_During_G1_S_Tra | REACTOME_Cyclin_E_   | 61  |
| BLUM_RESPONSE_TO_SALIRASIB_DN                       | BLUM_RESPONSE_TO_    | 328 |
| VERNELL_RETINOBLASTOMA_PATHWAY_DN                   | VERNELL_RETINOBLAS   | 18  |
| RHEIN_ALL_Glucocorticoid_Therapy_DN                 | RHEIN_ALL_Glucocoi   | 344 |
| IVANOVA_HEMATOPOIESIS_MATURE_CELL                   | IVANOVA_HEMATOPO     | 261 |
| DORN_ADENOVIRUS_INFECTION_12HR_UP                   | DORN_ADENOVIRUS_I    | 28  |
| BIOCARTA_TNFR1_PATHWAY                              | BIOCARTA_TNFR1_PAT   | 29  |
| SIG_PIP3_SIGNALING_IN_B_LYMPHOCYTES                 | SIG_PIP3_SIGNALING_  | 35  |
| RAHMAN_TP53_TARGETS_PHOSPHORYLATED                  | RAHMAN_TP53_TARG     | 21  |
| GAZIN_EPIGENETIC_SILENCING_BY_KRAS                  | GAZIN_EPIGENETIC_SII | 24  |
| REACTOME_HOST_INTERACTIONS_OF_HIV_FACTORS           | REACTOME_HOST_INT    | 115 |
| KEGG_T_CELL_RECEPTOR_SIGNALING_PATHWAY              | KEGG_T_CELL_RECEPT   | 105 |
| GUTIERREZ_CHRONIC_LYMPHOCYTIC_LEUKEMIA_DN           | GUTIERREZ_CHRONIC_   | 51  |
| REACTOME_Cyclin_A_B1_Associated_Events_During_G2_M  | REACTOME_Cyclin_A_   | 15  |
| MURAKAMI_UV_RESPONSE_6HR_DN                         | MURAKAMI_UV_RESPH    | 20  |
| MIKKELSEN_MCV6_ICP_WITH_H3K27ME3                    | MIKKELSEN_MCV6_ICF   | 67  |
| WANG_NFKB_TARGETS                                   | WANG_NFKB_TARGET     | 24  |
| PID_FRA_PATHWAY                                     | PID_FRA_PATHWAY      | 36  |
| PID_PI3K_PLC_TRK_PATHWAY                            | PID_PI3K_PLC_TRK_PA  | 34  |
| GARY_CD5_TARGETS_UP                                 | GARY_CD5_TARGETS_    | 431 |
| VALK_AML_CLUSTER_8                                  | VALK_AML_CLUSTER_8   | 23  |
| ACEVEDO_LIVER_CANCER_WITH_H3K9ME3_DN                | ACEVEDO_LIVER_CANC   | 90  |

|                                                   |                     |     |
|---------------------------------------------------|---------------------|-----|
| NELSON_RESPONSE_TO_ANDROGEN_DN                    | NELSON_RESPONSE_T   | 19  |
| PID_RAS_PATHWAY                                   | PID_RAS_PATHWAY     | 28  |
| LI_LUNG_CANCER                                    | LI_LUNG_CANCER      | 40  |
| REACTOME_ELONGATION_ARREST_AND_RECOVERY           | REACTOME_ELONGATI   | 24  |
| HOELZEL_NF1_TARGETS_UP                            | HOELZEL_NF1_TARGET  | 128 |
| BASAKI_YBX1_TARGETS_UP                            | BASAKI_YBX1_TARGET  | 261 |
| WANG_RECURRENT_LIVER_CANCER_DN                    | WANG_RECURRENT_LI   | 16  |
| DANG_MYC_TARGETS_UP                               | DANG_MYC_TARGETS_   | 138 |
| MIKKELSEN_MEF_ICP_WITH_H3K4ME3_AND_H3K27ME3       | MIKKELSEN_MEF_ICP_  | 38  |
| LABBE_TGFB1_TARGETS_DN                            | LABBE_TGFB1_TARGET  | 95  |
| REACTOME_ION_CHANNEL_TRANSPORT                    | REACTOME_ION_CHAI   | 53  |
| BIOCARTA_RACCYCD_PATHWAY                          | BIOCARTA_RACCYCD_I  | 25  |
| SHEN_SMARCA2_TARGETS_DN                           | SHEN_SMARCA2_TARC   | 273 |
| REACTOME_REGULATION_OF_APOPTOSIS                  | REACTOME_REGULATI   | 56  |
| HINATA_NFKB_TARGETS_KERATINOCYTE_DN               | HINATA_NFKB_TARGET  | 20  |
| LIN_NPAS4_TARGETS_UP                              | LIN_NPAS4_TARGETS_  | 143 |
| REACTOME_RNA_POL_III_TRANSCRIPTION_TERMINATION    | REACTOME_RNA_POL_   | 19  |
| JIANG_AGING_HYPOTHALAMUS_DN                       | JIANG_AGING_HYPOTI  | 40  |
| LIU_BREAST_CANCER                                 | LIU_BREAST_CANCER   | 23  |
| PID_PI3KCI_PATHWAY                                | PID_PI3KCI_PATHWAY  | 48  |
| BROWNE_HCMV_INFECTION_6HR_UP                      | BROWNE_HCMV_INFE    | 62  |
| PID_MET_PATHWAY                                   | PID_MET_PATHWAY     | 79  |
| AMIT_EGF_RESPONSE_240_MCF10A                      | AMIT_EGF_RESPONSE_  | 19  |
| SHIPP_DLCL_VS_FOLLICULAR_LYMPHOMA_UP              | SHIPP_DLCL_VS_FOLI  | 43  |
| KEGG_B_CELL_RECEPTOR_SIGNALING_PATHWAY            | KEGG_B_CELL_RECEPT  | 73  |
| GRAHAM_CML_QUIESCENT_VS_NORMAL_QUIESCENT_DN       | GRAHAM_CML_QUIES    | 38  |
| BOYALT_LIVER_CANCER_SUBCLASS_G1_DN                | BOYALT_LIVER_CANC   | 33  |
| LIU_VAV3_PROSTATE_CARCINOGENESIS_DN               | LIU_VAV3_PROSTATE_  | 16  |
| PID_HEDGEHOG_GLI_PATHWAY                          | PID_HEDGEHOG_GLI_   | 48  |
| ZAMORA_NOS2_TARGETS_UP                            | ZAMORA_NOS2_TARG    | 64  |
| KEGG_TASTE_TRANSDUCTION                           | KEGG_TASTE_TRANSD   | 26  |
| REACTOME_DESTABILIZATION_OF_MRNA_BY_AUF1_HNRNP_D0 | REACTOME_DESTABILI  | 50  |
| TARTE_PLASMA_CELL_VS_PLASMABLAST_DN               | TARTE_PLASMA_CELL_  | 298 |
| JAIN_NFKB_SIGNALING                               | JAIN_NFKB_SIGNALING | 70  |
| PID_AMB2_NEUTROPHILS_PATHWAY                      | PID_AMB2_NEUTROPH   | 40  |
| BOUDOUKHA_BOUND_BY_IGF2BP2                        | BOUDOUKHA_BOUND_    | 101 |
| LAIHO_COLORECTAL_CANCER_SERRATED_DN               | LAIHO_COLORECTAL_C  | 72  |
| FERRARI_RESPONSE_TO_FENRETINIDE_UP                | FERRARI_RESPONSE_T  | 21  |
| MOREAUX_B_LYMPHOCYTE_MATURATION_BY_TACI_DN        | MOREAUX_B_LYMPHC    | 63  |
| CROONQUIST_NRAS_SIGNALING_UP                      | CROONQUIST_NRAS_S   | 36  |
| KYNG_ENVIRONMENTAL_STRESS_RESPONSE_DN             | KYNG_ENVIRONMENT    | 18  |
| MURAKAMI_UV_RESPONSE_6HR_UP                       | MURAKAMI_UV_RESPI   | 32  |
| DACOSTA_UV_RESPONSE_VIA_ERCC3_XPCS_UP             | DACOSTA_UV_RESPON   | 26  |
| LIU_SOX4_TARGETS_UP                               | LIU_SOX4_TARGETS_U  | 120 |
| VILLANUEVA_LIVER_CANCER_KRT19_DN                  | VILLANUEVA_LIVER_C/ | 55  |
| ZHAN_MULTIPLE_MYELOMA_CD1_VS_CD2_UP               | ZHAN_MULTIPLE_MYE   | 63  |
| GRAHAM_NORMAL_QUIESCENT_VS_NORMAL_DIVIDING_UP     | GRAHAM_NORMAL_Q     | 64  |
| LY_AGING_MIDDLE_DN                                | LY_AGING_MIDDLE_DI  | 16  |
| ST_GA13_PATHWAY                                   | ST_GA13_PATHWAY     | 34  |
| GUENTHER_GROWTH_SPHERICAL_VS_ADHERENT_UP          | GUENTHER_GROWTH_    | 21  |

|                                                     |                     |     |
|-----------------------------------------------------|---------------------|-----|
| REACTOME_REGULATION_OF_WATER_BALANCE_BY_RENAL_AQL   | REACTOME_REGULATI   | 42  |
| TRAYNOR_RETT_SYNDROM_DN                             | TRAYNOR_RETT_SYND   | 17  |
| KEGG_RIBOFLAVIN_METABOLISM                          | KEGG_RIBOFLAVIN_MI  | 16  |
| JAZAERI_BREAST_CANCER_BRCA1_VS_BRCA2_UP             | JAZAERI_BREAST_CAN  | 48  |
| YU_BAP1_TARGETS                                     | YU_BAP1_TARGETS     | 27  |
| PAL_PRMT5_TARGETS_DN                                | PAL_PRMT5_TARGETS   | 29  |
| HU_GENOTOXIC_DAMAGE_4HR                             | HU_GENOTOXIC_DAM    | 35  |
| HUMMERICH_BENIGN_SKIN_TUMOR_UP                      | HUMMERICH_BENIGN    | 16  |
| GALE_APL_WITH_FLT3_MUTATED_UP                       | GALE_APL_WITH_FLT3  | 49  |
| TOMIDA_METASTASIS_DN                                | TOMIDA_METASTASIS   | 17  |
| REACTOME_THROMBIN_SIGNALLING_THROUGH_PROTEINASE_A   | REACTOME_THROMBI    | 32  |
| LIM_MAMMARY_STEM_CELL_DN                            | LIM_MAMMARY_STEM    | 394 |
| TONKS_TARGETS_OF_RUNX1_RUNX1T1_FUSION_SUSTAINED     | TONKS_TARGETS_OF_   | 41  |
| GROSS_HYPOXIA_VIA_ELK3_ONLY_DN                      | GROSS_HYPOXIA_VIA_  | 40  |
| SHIPP_DLBCL_VS_FOLLICULAR_LYMPHOMA_DN               | SHIPP_DLBCL_VS_FOLI | 41  |
| LASTOWSKA_NEUROBLASTOMA_COPY_NUMBER_UP              | LASTOWSKA_NEUROB    | 165 |
| REACTOME_GLUCCONEOGENESIS                           | REACTOME_GLUCCONE   | 28  |
| PID_CD8_TCR_PATHWAY                                 | PID_CD8_TCR_PATHW   | 50  |
| LEE_AGING_MUSCLE_UP                                 | LEE_AGING_MUSCLE_I  | 42  |
| BIOCARTA_CK1_PATHWAY                                | BIOCARTA_CK1_PATH   | 15  |
| VALK_AML_CLUSTER_1                                  | VALK_AML_CLUSTER_:  | 27  |
| KEGG_SPLICEOSOME                                    | KEGG_SPLICEOSOME    | 121 |
| AMIT_EGF_RESPONSE_40_HELA                           | AMIT_EGF_RESPONSE   | 42  |
| MOREAUX_MULTIPLE_MYELOMA_BY_TACI_DN                 | MOREAUX_MULTIPLE_   | 150 |
| KEGG_PARKINSONS_DISEASE                             | KEGG_PARKINSONS_D   | 109 |
| BIOCARTA_G1_PATHWAY                                 | BIOCARTA_G1_PATHW   | 27  |
| RASHI_RESPONSE_TO_IONIZING_RADIATION_6              | RASHI_RESPONSE_TO_  | 76  |
| HERNANDEZ_ABERRANT_MITOSIS_BY_DOCETACEL_2NM_DN      | HERNANDEZ_ABERRAN   | 23  |
| TORCHIA_TARGETS_OF_EWSR1_FLI1_FUSION_TOP20_UP       | TORCHIA_TARGETS_OI  | 17  |
| SARTIPY_BLUNTED_BY_INSULIN_RESISTANCE_UP            | SARTIPY_BLUNTED_BY  | 18  |
| REACTOME_MRNA_SPLICING_MINOR_PATHWAY                | REACTOME_MRNA_SP    | 41  |
| WANG_BARRETTS_ESOPHAGUS_DN                          | WANG_BARRETTS_ESC   | 23  |
| WEIGEL_OXIDATIVE_STRESS_BY_HNE_AND_H2O2             | WEIGEL_OXIDATIVE_S  | 39  |
| PID_AURORA_B_PATHWAY                                | PID_AURORA_B_PATH   | 38  |
| MORI_EMU_MYC_LYMPHOMA_BY_ONSET_TIME_DN              | MORI_EMU_MYC_LYM    | 16  |
| THILLAINADESAN_ZNF217_TARGETS_UP                    | THILLAINADESAN_ZNF  | 42  |
| GRANDVAUX_IRF3_TARGETS_UP                           | GRANDVAUX_IRF3_TA   | 15  |
| TONG_INTERACT_WITH_PTTG1                            | TONG_INTERACT_WIT   | 49  |
| GAUSSMANN_MLL_AF4_FUSION_TARGETS_C_DN               | GAUSSMANN_MLL_AF    | 19  |
| GAZDA_DIAMOND_BLACKFAN_ANEMIA_PROGENITOR_DN         | GAZDA_DIAMOND_BL    | 60  |
| SAKAI_TUMOR_INFILTRATING_MONOCYTES_DN               | SAKAI_TUMOR_INFILT  | 73  |
| BIOCARTA_PROTEASOME_PATHWAY                         | BIOCARTA_PROTEASO   | 28  |
| ONO_AML1_TARGETS_DN                                 | ONO_AML1_TARGETS    | 39  |
| REACTOME_CLEAVAGE_OF_GROWING_TRANSCRIPT_IN_THE_TER  | REACTOME_CLEAVAGE   | 41  |
| REACTOME_PI3K_AKT_ACTIVATION                        | REACTOME_PI3K_AKT   | 36  |
| DAZARD_UV_RESPONSE_CLUSTER_G28                      | DAZARD_UV_RESPONS   | 18  |
| KEGG_AMYOTROPHIC_LATERAL_SCLEROSIS_ALS              | KEGG_AMYOTROPHIC    | 51  |
| AFFAR_YY1_TARGETS_DN                                | AFFAR_YY1_TARGETS   | 218 |
| MASRI_RESISTANCE_TO_TAMOXIFEN_AND_AROMATASE_INHIBIT | MASRI_RESISTANCE_T  | 19  |
| PID_RB_1PATHWAY                                     | PID_RB_1PATHWAY     | 63  |



|                                                     |                                                     |     |
|-----------------------------------------------------|-----------------------------------------------------|-----|
| CUI_GLUCCOSE_DEPRIVATION                            | CUI_GLUCCOSE_DEPRIV                                 | 58  |
| PODAR_RESPONSE_TO_ADAPHOSTIN_DN                     | PODAR_RESPONSE_TC                                   | 15  |
| BOSCO_ALLERGEN_INDUCED_TH2_ASSOCIATED_MODULE        | BOSCO_ALLERGEN_INI                                  | 137 |
| ONDER_CDH1_TARGETS_1_DN                             | ONDER_CDH1_TARGETS_1                                | 154 |
| HANSON_HRAS_SIGNALING_VIA_NFKB                      | HANSON_HRAS_SIGNALING                               | 21  |
| KAYO_AGING_MUSCLE_DN                                | KAYO_AGING_MUSCLE                                   | 113 |
| SIG_INSULIN_RECEPTOR_PATHWAY_IN_CARDIAC_MYOCYTES    | SIG_INSULIN_RECEPTC                                 | 50  |
| BAKER_HEMATOPOIESIS_STAT3_TARGETS                   | BAKER_HEMATOPOIESIS                                 | 16  |
| HOWLIN_CITED1_TARGETS_1_DN                          | HOWLIN_CITED1_TARGETS                               | 33  |
| REACTOME_RNA_POL_I_TRANSCRIPTION_TERMINATION        | REACTOME_RNA_POL_I                                  | 20  |
| PACHER_TARGETS_OF_IGF1_AND_IGF2_UP                  | PACHER_TARGETS_OF_IGF                               | 35  |
| BILD_MYC_ONCOGENIC_SIGNATURE                        | BILD_MYC_ONCOGENIC                                  | 179 |
| OUILLETTE_CLL_13Q14_DELETION_DN                     | OUILLETTE_CLL_13Q14                                 | 53  |
| CHOI_ATL_CHRONIC_VS_ACUTE_DN                        | CHOI_ATL_CHRONIC_VS                                 | 18  |
| SHAFFER_IRF4_TARGETS_IN_MYELOMA_VS_MATURE_B_LYMPHC  | SHAFFER_IRF4_TARGETS                                | 98  |
| LIN_APC_TARGETS                                     | LIN_APC_TARGETS                                     | 75  |
| KEGG_OXIDATIVE_PHOSPHORYLATION                      | KEGG_OXIDATIVE_PHOS                                 | 112 |
| KRIGE_AMINO_ACID_DEPRIVATION                        | KRIGE_AMINO_ACID_DEPR                               | 29  |
| CHO_NR4A1_TARGETS                                   | CHO_NR4A1_TARGETS                                   | 30  |
| NIKOLSKY_BREAST_CANCER_17Q11_Q21_AMPLICON           | NIKOLSKY_BREAST_CANCER                              | 110 |
| DAUER_STAT3_TARGETS_UP                              | DAUER_STAT3_TARGETS                                 | 45  |
| STARK_PREFRONTAL_CORTEX_22Q11_DELETION_DN           | STARK_PREFRONTAL_CORTEX                             | 459 |
| REACTOME_MRNA_PROCESSING                            | REACTOME_MRNA_PROCESSING                            | 151 |
| REACTOME_PROCESSING_OF_CAPPED_INTRON_CONTAINING_PR  | REACTOME_PROCESSING_OF_CAPPED_INTRON                | 134 |
| DOANE_BREAST_CANCER_ESR1_UP                         | DOANE_BREAST_CANCER                                 | 99  |
| BIOCARTA_TID_PATHWAY                                | BIOCARTA_TID_PATHWAY                                | 18  |
| WEST_ADRENOCORTICAL_TUMOR_UP                        | WEST_ADRENOCORTICAL_TUMOR                           | 276 |
| GOLUB_ALL_VS_AML_DN                                 | GOLUB_ALL_VS_AML_DN                                 | 22  |
| HUANG_FOXA2_TARGETS_DN                              | HUANG_FOXA2_TARGETS                                 | 35  |
| WILENSKY_RESPONSE_TO_DARAPLADIB                     | WILENSKY_RESPONSE_TO_DARAPLADIB                     | 28  |
| POMEROY_MEDULLOBLASTOMA_PROGNOSIS_DN                | POMEROY_MEDULLOBLASTOMA                             | 43  |
| KARLSSON_TGFB1_TARGETS_UP                           | KARLSSON_TGFB1_TARGETS                              | 120 |
| HOLLERN_MICROACINAR_BREAST_TUMOR_UP                 | HOLLERN_MICROACINAR_BREAST_TUMOR                    | 30  |
| BIOCARTA_TH1TH2_PATHWAY                             | BIOCARTA_TH1TH2_PATHWAY                             | 16  |
| NEMETH_INFLAMMATORY_RESPONSE_LPS_DN                 | NEMETH_INFLAMMATORY_RESPONSE_LPS                    | 30  |
| ONO_FOXP3_TARGETS_UP                                | ONO_FOXP3_TARGETS                                   | 23  |
| SENGUPTA_NASOPHARYNGEAL_CARCCINOMA_WITH_LMP1_DN     | SENGUPTA_NASOPHARYNGEAL_CARCCINOMA                  | 131 |
| WANG_METASTASIS_OF_BREAST_CANCER_ESR1_DN            | WANG_METASTASIS_OF_BREAST_CANCER                    | 25  |
| ST_INTERLEUKIN_4_PATHWAY                            | ST_INTERLEUKIN_4_PATHWAY                            | 23  |
| PID_IL12_2PATHWAY                                   | PID_IL12_2PATHWAY                                   | 57  |
| MAGRANGEAS_MULTIPLE_MYELOMA_IGLL_VS_IGLK_UP         | MAGRANGEAS_MULTIPLE_MYELOMA                         | 39  |
| PRAMOONJAGO_SOX4_TARGETS_DN                         | PRAMOONJAGO_SOX4_TARGETS                            | 49  |
| FOSTER_KDM1A_TARGETS_UP                             | FOSTER_KDM1A_TARGETS                                | 230 |
| NIELSEN_SCHWANNOMA_UP                               | NIELSEN_SCHWANNOMA                                  | 16  |
| REACTOME_DESTABILIZATION_OF_MRNA_BY_BRF1            | REACTOME_DESTABILIZATION_OF_MRNA                    | 17  |
| SCHEIDEREIT_IKK_TARGETS                             | SCHEIDEREIT_IKK_TARGETS                             | 17  |
| ZHU_CMV_ALL_UP                                      | ZHU_CMV_ALL_UP                                      | 113 |
| REACTOME_MYOGENESIS                                 | REACTOME_MYOGENESIS                                 | 26  |
| REACTOME_P53_INDEPENDENT_G1_S_DNA_DAMAGE_CHECKPOINT | REACTOME_P53_INDEPENDENT_G1_S_DNA_DAMAGE_CHECKPOINT | 48  |
| JAERVINEN_AMPLIFIED_IN_LARYNGEAL_CANCER             | JAERVINEN_AMPLIFIED_IN_LARYNGEAL_CANCER             | 35  |

|                                                     |                                                     |     |
|-----------------------------------------------------|-----------------------------------------------------|-----|
| JIANG_HYPOXIA_VIA_VHL                               | JIANG_HYPOXIA_VIA_VHL                               | 32  |
| KEGG_PRION_DISEASES                                 | KEGG_PRION_DISEASE                                  | 33  |
| REACTOME_AUTODEGRADATION_OF_THE_E3_UBIQUITIN_LIGAS  | REACTOME_AUTODEGRADATION_OF_THE_E3_UBIQUITIN_LIGAS  | 46  |
| PENG_LEUCINE_DEPRIVATION_DN                         | PENG_LEUCINE_DEPRIVATION_DN                         | 179 |
| GUTIERREZ_MULTIPLE_MYELOMA_UP                       | GUTIERREZ_MULTIPLE_MYELOMA_UP                       | 30  |
| PID_CIRCADIAN_PATHWAY                               | PID_CIRCADIAN_PATHWAY                               | 15  |
| PID_BCR_5PATHWAY                                    | PID_BCR_5PATHWAY                                    | 63  |
| VANHARANTA_UTERINE_FIBROID_WITH_7Q_DELETION_UP      | VANHARANTA_UTERINE_FIBROID_WITH_7Q_DELETION_UP      | 65  |
| SIMBULAN_PARP1_TARGETS_DN                           | SIMBULAN_PARP1_TARGETS_DN                           | 17  |
| PID_INTEGRIN2_PATHWAY                               | PID_INTEGRIN2_PATHWAY                               | 27  |
| NAKAJIMA_EOSINOPHIL                                 | NAKAJIMA_EOSINOPHIL                                 | 27  |
| ZHAN_V1_LATE_DIFFERENTIATION_GENES_DN               | ZHAN_V1_LATE_DIFFERENTIATION_GENES_DN               | 15  |
| HUPER_BREAST_BASAL_VS_LUMINAL_DN                    | HUPER_BREAST_BASAL_VS_LUMINAL_DN                    | 53  |
| ROVERSI_GLIOMA_LOH_REGIONS                          | ROVERSI_GLIOMA_LOH_REGIONS                          | 43  |
| TAKAO_RESPONSE_TO_UVB_RADIATION_UP                  | TAKAO_RESPONSE_TO_UVB_RADIATION_UP                  | 82  |
| ZHAN_MULTIPLE_MYELOMA_HP_UP                         | ZHAN_MULTIPLE_MYELOMA_HP_UP                         | 42  |
| MEINHOLD_OVARIAN_CANCER_LOW_GRADE_DN                | MEINHOLD_OVARIAN_CANCER_LOW_GRADE_DN                | 20  |
| AMUNDSON_DNA_DAMAGE_RESPONSE_TP53                   | AMUNDSON_DNA_DAMAGE_RESPONSE_TP53                   | 15  |
| ABE_VEGFA_TARGETS_2HR                               | ABE_VEGFA_TARGETS_2HR                               | 32  |
| NATSUME_RESPONSE_TO_INTERFERON_BETA_UP              | NATSUME_RESPONSE_TO_INTERFERON_BETA_UP              | 65  |
| CHOI_ATL_STAGE_PREDICTOR                            | CHOI_ATL_STAGE_PREDICTOR                            | 35  |
| WANG_LSD1_TARGETS_DN                                | WANG_LSD1_TARGETS_DN                                | 38  |
| KRIEG_KDM3A_TARGETS_NOT_HYPOXIA                     | KRIEG_KDM3A_TARGETS_NOT_HYPOXIA                     | 177 |
| REACTOME_CHEMOKINE_RECEPTORS_BIND_CHEMOKINES        | REACTOME_CHEMOKINE_RECEPTORS_BIND_CHEMOKINES        | 48  |
| SMID_BREAST_CANCER_RELAPSE_IN_LUNG_UP               | SMID_BREAST_CANCER_RELAPSE_IN_LUNG_UP               | 19  |
| REACTOME_CROSS_PRESENTATION_OF_SOLUBLE_EXOGENOUS_A  | REACTOME_CROSS_PRESENTATION_OF_SOLUBLE_EXOGENOUS_A  | 45  |
| PID_TCR_PATHWAY                                     | PID_TCR_PATHWAY                                     | 63  |
| AIYAR_COBRA1_TARGETS_UP                             | AIYAR_COBRA1_TARGETS_UP                             | 35  |
| MCCLUNG_COCAIN_REWARD_4WK                           | MCCLUNG_COCAIN_REWARD_4WK                           | 71  |
| PID_P38_ALPHA_BETA_PATHWAY                          | PID_P38_ALPHA_BETA_PATHWAY                          | 31  |
| CHANGOLKAR_H2AFY_TARGETS_DN                         | CHANGOLKAR_H2AFY_TARGETS_DN                         | 38  |
| SAKAI_CHRONIC_HEPATITIS_VS_LIVER_CANCER_UP          | SAKAI_CHRONIC_HEPATITIS_VS_LIVER_CANCER_UP          | 76  |
| BIOCARTA_NO2IL12_PATHWAY                            | BIOCARTA_NO2IL12_PATHWAY                            | 17  |
| AIYAR_COBRA1_TARGETS_DN                             | AIYAR_COBRA1_TARGETS_DN                             | 23  |
| REACTOME_CDK_MEDIATED_PHOSPHORYLATION_AND_REMOVA    | REACTOME_CDK_MEDIATED_PHOSPHORYLATION_AND_REMOVA    | 46  |
| MORI_PRE_BI_LYMPHOCYTE_UP                           | MORI_PRE_BI_LYMPHOCYTE_UP                           | 77  |
| PENG_LEUCINE_DEPRIVATION_UP                         | PENG_LEUCINE_DEPRIVATION_UP                         | 129 |
| BIOCARTA_41BB_PATHWAY                               | BIOCARTA_41BB_PATHWAY                               | 17  |
| WELCSH_BRCA1_TARGETS_DN                             | WELCSH_BRCA1_TARGETS_DN                             | 138 |
| REACTOME_BOTULINUM_NEUROTOXICITY                    | REACTOME_BOTULINUM_NEUROTOXICITY                    | 15  |
| MIKKELSEN_MEF_LCP_WITH_H3K27ME3                     | MIKKELSEN_MEF_LCP_WITH_H3K27ME3                     | 59  |
| BIOCARTA_CELLCYCLE_PATHWAY                          | BIOCARTA_CELLCYCLE_PATHWAY                          | 23  |
| GREENBAUM_E2A_TARGETS_UP                            | GREENBAUM_E2A_TARGETS_UP                            | 30  |
| REACTOME_SCF_BETA_TRCP_MEDIATED_DEGRADATION_OF_EM   | REACTOME_SCF_BETA_TRCP_MEDIATED_DEGRADATION_OF_EM   | 48  |
| MEISSNER_BRAIN_HCP_WITH_H3K4ME2_AND_H3K27ME3        | MEISSNER_BRAIN_HCP_WITH_H3K4ME2_AND_H3K27ME3        | 56  |
| IVANOVA_HEMATOPOIESIS_INTERMEDIATE_PROGENITOR       | IVANOVA_HEMATOPOIESIS_INTERMEDIATE_PROGENITOR       | 134 |
| BIOCARTA_LAIR_PATHWAY                               | BIOCARTA_LAIR_PATHWAY                               | 16  |
| KERLEY_RESPONSE_TO_CISPLATIN_UP                     | KERLEY_RESPONSE_TO_CISPLATIN_UP                     | 38  |
| ZEMBUTSU_SENSITIVITY_TO_CYCLOPHOSPHAMIDE            | ZEMBUTSU_SENSITIVITY_TO_CYCLOPHOSPHAMIDE            | 15  |
| REACTOME_REGULATION_OF_MRNA_STABILITY_BY_PROTEINS_T | REACTOME_REGULATION_OF_MRNA_STABILITY_BY_PROTEINS_T | 81  |

|                                                      |                     |     |
|------------------------------------------------------|---------------------|-----|
| FARMER_BREAST_CANCER_CLUSTER_5                       | FARMER_BREAST_CAN   | 17  |
| KEGG_GLYCOPHINGOLIPID_BIOSYNTHESIS_GANGLIO_SERIES    | KEGG_GLYCOPHINGO    | 15  |
| GAL_LEUKEMIC_STEM_CELL_DN                            | GAL_LEUKEMIC_STEM   | 211 |
| SCHLESINGER_H3K27ME3_IN_NORMAL_AND_METHYLATED_IN_C   | SCHLESINGER_H3K27M  | 27  |
| GAJATE_RESPONSE_TO TRABECTEDIN_DN                    | GAJATE_RESPONSE_TC  | 19  |
| ZWANG_EGF_PERSISTENTLY_UP                            | ZWANG_EGF_PERSISTI  | 27  |
| WANG_TUMOR_INVASIVENESS_UP                           | WANG_TUMOR_INVA     | 354 |
| LEIN_NEURON_MARKERS                                  | LEIN_NEURON_MARKE   | 65  |
| REACTOME_TCA_CYCLE_AND_RESPIRATORY_ELECTRON_TRANSP   | REACTOME_TCA_CYCL   | 112 |
| REACTOME_P53_DEPENDENT_G1_DNA_DAMAGE_RESPONSE        | REACTOME_P53_DEPE   | 52  |
| MISSIAGLIA_REGULATED_BY_METHYLATION_UP               | MISSIAGLIA_REGULATI | 111 |
| TERAMOTO_OPN_TARGETS_CLUSTER_7                       | TERAMOTO_OPN_TAR    | 17  |
| REACTOME_AUTODEGRADATION_OF_CDH1_BY_CDH1_APC_C       | REACTOME_AUTODEG    | 56  |
| YUAN_ZNF143_PARTNERS                                 | YUAN_ZNF143_PARTN   | 22  |
| KOINUMA_COLON_CANCER_MSI_UP                          | KOINUMA_COLON_CA    | 15  |
| CHEMELLO_SOLEUS_VS_EDL_MYOFIBERS_DN                  | CHEMELLO_SOLEUS_V   | 19  |
| LUI_TARGETS_OF_PAX8_PPARG_FUSION                     | LUI_TARGETS_OF_PAX  | 32  |
| PID_EPO_PATHWAY                                      | PID_EPO_PATHWAY     | 33  |
| ACOSTA_PROLIFERATION_INDEPENDENT_MYC_TARGETS_DN      | ACOSTA_PROLIFERATI  | 104 |
| REACTOME_VIF_MEDIATED_DEGRADATION_OF_APOBEC3G        | REACTOME_VIF_MEDI   | 48  |
| RHODES_CANCER_META_SIGNATURE                         | RHODES_CANCER_ME    | 62  |
| IGARASHI_ATF4_TARGETS_DN                             | IGARASHI_ATF4_TARG  | 82  |
| REACTOME_POST_NMDA_RECEPTOR_ACTIVATION_EVENTS        | REACTOME_POST_NM    | 32  |
| ZEMBUTSU_SENSITIVITY_TO_NIMUSTINE                    | ZEMBUTSU_SENSITIVI  | 15  |
| REACTOME_CTLA4_INHIBITORY_SIGNALING                  | REACTOME_CTLA4_INI  | 21  |
| PID_IL6_7_PATHWAY                                    | PID_IL6_7_PATHWAY   | 46  |
| LEE_LIVER_CANCER_SURVIVAL_UP                         | LEE_LIVER_CANCER_SI | 153 |
| AMIT_SERUM_RESPONSE_40_MCF10A                        | AMIT_SERUM_RESPON   | 30  |
| LIN_NPAS4_TARGETS_DN                                 | LIN_NPAS4_TARGETS_  | 61  |
| FLOTHO_PEDIATRIC_ALL_THERAPY_RESPONSE_UP             | FLOTHO_PEDIATRIC_A  | 50  |
| ALTEMEIER_RESPONSE_TO_LPS_WITH_MECHANICAL_VENTILATIC | ALTEMEIER_RESPONSE  | 113 |
| BROWNE_HCMV_INFECTION_14HR_UP                        | BROWNE_HCMV_INFE    | 138 |
| LIU_IL13_MEMORY_MODEL_UP                             | LIU_IL13_MEMORY_M   | 16  |
| CHAUHAN_RESPONSE_TO_METHOXYESTRADIOL_UP              | CHAUHAN_RESPONSE_   | 48  |
| GAURNIER_PSMD4_TARGETS                               | GAURNIER_PSMD4_TA   | 48  |
| REACTOME_MRNA_SPLICING                               | REACTOME_MRNA_SP    | 105 |
| REACTOME_FORMATION_OF_INCISION_COMPLEX_IN_GG_NER     | REACTOME_FORMATIC   | 20  |
| REACTOME_DEGRADATION_OF_THE_EXTRACELLULAR_MATRIX     | REACTOME_DEGRADA    | 26  |
| MEINHOLD_OVARIAN_CANCER_LOW_GRADE_UP                 | MEINHOLD_OVARIAN_   | 18  |
| HASLINGER_B_CLL_WITH_13Q14_DELETION                  | HASLINGER_B_CLL_WI  | 21  |
| HOFMANN_MYELODYSPLASTIC_SYNDROM_LOW_RISK_UP          | HOFMANN_MYELODY     | 20  |
| MATTIOLI_MGUS_VS_MULTIPLE_MYELOMA                    | MATTIOLI_MGUS_VS_   | 16  |
| KEGG_ADIPOCYTOKINE_SIGNALING_PATHWAY                 | KEGG_ADIPOCYTOKINI  | 67  |
| KEGG_PYRUVATE_METABOLISM                             | KEGG_PYRUVATE_MET   | 36  |
| REACTOME_PEPTIDE_LIGAND_BINDING_RECEPTORS            | REACTOME_PEPTIDE_I  | 167 |
| SIG_BCR_SIGNALING_PATHWAY                            | SIG_BCR_SIGNALING_I | 46  |
| NAGY_TFTC_COMPONENTS_HUMAN                           | NAGY_TFTC_COMPON    | 17  |
| KEGG_PROTEASOME                                      | KEGG_PROTEASOME     | 44  |
| STARK_HYPPOCAMPUS_22Q11_DELETION_DN                  | STARK_HYPPOCAMPUS   | 18  |
| ELVIDGE_HIF1A_AND_HIF2A_TARGETS_UP                   | ELVIDGE_HIF1A_AND_  | 36  |

|                                                       |                                                       |     |
|-------------------------------------------------------|-------------------------------------------------------|-----|
| ELVIDGE_HYPOXIA_DN                                    | ELVIDGE_HYPOXIA_DN                                    | 134 |
| PID_CD8_TCR_DOWNSTREAM_PATHWAY                        | PID_CD8_TCR_DOWNSTREAM_PATHWAY                        | 56  |
| LUI_THYROID_CANCER_PAX8_PPARG_DN                      | LUI_THYROID_CANCER_PAX8_PPARG_DN                      | 43  |
| KUROZUMI_RESPONSE_TO_ONCOCYTIC_VIRUS                  | KUROZUMI_RESPONSE_TO_ONCOCYTIC_VIRUS                  | 42  |
| KUNINGER_IGF1_VS_PDGF_TARGETS_UP                      | KUNINGER_IGF1_VS_PDGF_TARGETS_UP                      | 77  |
| REACTOME_DESTABILIZATION_OF_MRNA_BY_TRISTETRAPROLIN   | REACTOME_DESTABILIZATION_OF_MRNA_BY_TRISTETRAPROLIN   | 17  |
| MCGOWAN_RSP6_TARGETS_UP                               | MCGOWAN_RSP6_TARGETS_UP                               | 17  |
| ELVIDGE_HIF1A_TARGETS_UP                              | ELVIDGE_HIF1A_TARGETS_UP                              | 62  |
| MCCLUNG_COCAINE_REWARD_5D                             | MCCLUNG_COCAINE_REWARD_5D                             | 78  |
| CAIRO_PML_TARGETS_BOUND_BY_MYC_UP                     | CAIRO_PML_TARGETS_BOUND_BY_MYC_UP                     | 22  |
| GARGALOVIC_RESPONSE_TO_OXIDIZED_PHOSPHOLIPIDS_GREEN   | GARGALOVIC_RESPONSE_TO_OXIDIZED_PHOSPHOLIPIDS_GREEN   | 23  |
| PID_PLK1_PATHWAY                                      | PID_PLK1_PATHWAY                                      | 45  |
| WANG_METASTASIS_OF_BREAST_CANCER_ESR1_UP              | WANG_METASTASIS_OF_BREAST_CANCER_ESR1_UP              | 19  |
| NIKOLSKY_BREAST_CANCER_5P15_AMPLICON                  | NIKOLSKY_BREAST_CANCER_5P15_AMPLICON                  | 24  |
| SANA_TNF_SIGNALING_UP                                 | SANA_TNF_SIGNALING_UP                                 | 73  |
| LY_AGING_OLD_DN                                       | LY_AGING_OLD_DN                                       | 55  |
| FLORIO_NEOCORTEX_BASAL_RADIAL_GLIA_DN                 | FLORIO_NEOCORTEX_BASAL_RADIAL_GLIA_DN                 | 168 |
| REACTOME_SYNTHESIS_OF_PIP2_AT_THE_GOLGI_MEMBRANE      | REACTOME_SYNTHESIS_OF_PIP2_AT_THE_GOLGI_MEMBRANE      | 16  |
| LEE_LIVER_CANCER_MYC_DN                               | LEE_LIVER_CANCER_MYC_DN                               | 55  |
| REACTOME_REGULATION_OF_MITOTIC_CELL_CYCLE             | REACTOME_REGULATION_OF_MITOTIC_CELL_CYCLE             | 76  |
| KYNG_RESPONSE_TO_H2O2_VIA_ERCC6                       | KYNG_RESPONSE_TO_H2O2_VIA_ERCC6                       | 16  |
| MATZUK_MEIOTIC_AND_DNA_REPAIR                         | MATZUK_MEIOTIC_AND_DNA_REPAIR                         | 39  |
| CHANG_IMMORTALIZED_BY_HPV31_DN                        | CHANG_IMMORTALIZED_BY_HPV31_DN                        | 55  |
| WEBER_METHYLATED_ICP_IN_FIBROBLAST                    | WEBER_METHYLATED_ICP_IN_FIBROBLAST                    | 19  |
| RADAEVA_RESPONSE_TO_IFNA1_UP                          | RADAEVA_RESPONSE_TO_IFNA1_UP                          | 45  |
| SCHLOSSER_MYC_AND_SERUM_RESPONSE_SYNERGY              | SCHLOSSER_MYC_AND_SERUM_RESPONSE_SYNERGY              | 30  |
| PID_IL12_STAT4_PATHWAY                                | PID_IL12_STAT4_PATHWAY                                | 31  |
| KEGG_RIG_I_LIKE_RECEPTOR_SIGNALING_PATHWAY            | KEGG_RIG_I_LIKE_RECEPTOR_SIGNALING_PATHWAY            | 64  |
| REACTOME_APC_C_CDH1_MEDIATED_DEGRADATION_OF_CDC2C     | REACTOME_APC_C_CDH1_MEDIATED_DEGRADATION_OF_CDC2C     | 64  |
| MORI_EMU_MYC_LYMPHOMA_BY_ONSET_TIME_UP                | MORI_EMU_MYC_LYMPHOMA_BY_ONSET_TIME_UP                | 99  |
| REICHERT_MITOSIS_LIN9_TARGETS                         | REICHERT_MITOSIS_LIN9_TARGETS                         | 28  |
| REACTOME_APC_C_CDC20_MEDIATED_DEGRADATION_OF_MITC     | REACTOME_APC_C_CDC20_MEDIATED_DEGRADATION_OF_MITC     | 65  |
| REACTOME_METAL_ION_SLC_TRANSPORTERS                   | REACTOME_METAL_ION_SLC_TRANSPORTERS                   | 22  |
| ASGHARZADEH_NEUROBLASTOMA_POOR_SURVIVAL_DN            | ASGHARZADEH_NEUROBLASTOMA_POOR_SURVIVAL_DN            | 36  |
| ZHANG_ANTIVIRAL_RESPONSE_TO_RIBAVIRIN_UP              | ZHANG_ANTIVIRAL_RESPONSE_TO_RIBAVIRIN_UP              | 25  |
| WHITFIELD_CELL_CYCLE_G2                               | WHITFIELD_CELL_CYCLE_G2                               | 162 |
| YAO_TEMPORAL_RESPONSE_TO_PROGESTERONE_CLUSTER_11      | YAO_TEMPORAL_RESPONSE_TO_PROGESTERONE_CLUSTER_11      | 97  |
| REACTOME_METABOLISM_OF_RNA                            | REACTOME_METABOLISM_OF_RNA                            | 249 |
| FERRANDO_HOX11_NEIGHBORS                              | FERRANDO_HOX11_NEIGHBORS                              | 17  |
| REACTOME_GABA_SYNTHESIS_RELEASE_REUPTAKE_AND_DEGRA    | REACTOME_GABA_SYNTHESIS_RELEASE_REUPTAKE_AND_DEGRA    | 17  |
| NAKAMURA_CANCER_MICROENVIRONMENT_DN                   | NAKAMURA_CANCER_MICROENVIRONMENT_DN                   | 44  |
| REACTOME_RESPIRATORY_ELECTRON_TRANSPORT               | REACTOME_RESPIRATORY_ELECTRON_TRANSPORT               | 62  |
| NIKOLSKY_BREAST_CANCER_12Q24_AMPLICON                 | NIKOLSKY_BREAST_CANCER_12Q24_AMPLICON                 | 15  |
| BIOCARTA_CYTOKINE_PATHWAY                             | BIOCARTA_CYTOKINE_PATHWAY                             | 21  |
| REACTOME_RESPIRATORY_ELECTRON_TRANSPORT_ATP_SYNTHE    | REACTOME_RESPIRATORY_ELECTRON_TRANSPORT_ATP_SYNTHE    | 77  |
| MOSERLE_IFNA_RESPONSE                                 | MOSERLE_IFNA_RESPONSE                                 | 23  |
| WANG_RESPONSE_TO_FORSKOLIN_UP                         | WANG_RESPONSE_TO_FORSKOLIN_UP                         | 20  |
| REACTOME_INHIBITION_OF_THE_PROTEOLYTIC_ACTIVITY_OF_AP | REACTOME_INHIBITION_OF_THE_PROTEOLYTIC_ACTIVITY_OF_AP | 18  |
| FARMER_BREAST_CANCER_CLUSTER_1                        | FARMER_BREAST_CANCER_CLUSTER_1                        | 36  |
| REACTOME_APC_CDC20_MEDIATED_DEGRADATION_OF_NEK2A      | REACTOME_APC_CDC20_MEDIATED_DEGRADATION_OF_NEK2A      | 21  |

| ES       | NES      | NOM p-val | FDR q-val | FWER p-val | RANK AT M LEADING EDGE              |
|----------|----------|-----------|-----------|------------|-------------------------------------|
| 0.680545 | 1.672257 | 0.013619  | 1         | 0.86       | 1858 tags=44%, list=8%, signal=47%  |
| 0.631202 | 1.65186  | 0.004902  | 1         | 0.938      | 2859 tags=56%, list=12%, signal=64% |
| 0.604464 | 1.644647 | 0.014706  | 1         | 0.952      | 2099 tags=40%, list=9%, signal=44%  |
| 0.491411 | 1.616967 | 0.018939  | 1         | 0.98       | 3236 tags=35%, list=14%, signal=41% |
| 0.686999 | 1.599272 | 0         | 1         | 0.999      | 4556 tags=56%, list=19%, signal=69% |
| 0.480857 | 1.586804 | 0         | 1         | 0.999      | 3386 tags=38%, list=14%, signal=45% |
| 0.598134 | 1.58587  | 0.041441  | 1         | 0.999      | 3307 tags=55%, list=14%, signal=64% |
| 0.564362 | 1.534517 | 0.03252   | 1         | 1          | 3536 tags=56%, list=15%, signal=65% |
| 0.667918 | 1.497019 | 0.058601  | 1         | 1          | 4100 tags=50%, list=18%, signal=61% |
| 0.495566 | 1.494685 | 0.00491   | 1         | 1          | 2494 tags=32%, list=11%, signal=35% |
| 0.601752 | 1.487991 | 0.03964   | 1         | 1          | 5283 tags=53%, list=23%, signal=68% |
| 0.583409 | 1.473757 | 0.041096  | 1         | 1          | 4437 tags=59%, list=19%, signal=73% |
| 0.567627 | 1.47203  | 0.033074  | 1         | 1          | 1488 tags=39%, list=6%, signal=41%  |
| 0.545624 | 1.467806 | 0.036907  | 1         | 1          | 1948 tags=33%, list=8%, signal=36%  |
| 0.568725 | 1.461357 | 0.084922  | 1         | 1          | 2148 tags=37%, list=9%, signal=41%  |
| 0.539844 | 1.459822 | 0.024834  | 1         | 1          | 5150 tags=51%, list=22%, signal=65% |
| 0.516488 | 1.44987  | 0.018364  | 1         | 1          | 1794 tags=42%, list=8%, signal=46%  |
| 0.562629 | 1.435799 | 0.053381  | 1         | 1          | 3777 tags=48%, list=16%, signal=57% |
| 0.583532 | 1.431081 | 0.073529  | 1         | 1          | 5709 tags=67%, list=24%, signal=88% |
| 0.532281 | 1.424943 | 0.061111  | 1         | 1          | 4349 tags=50%, list=19%, signal=61% |
| 0.47903  | 1.422437 | 0.042254  | 1         | 1          | 7331 tags=62%, list=31%, signal=89% |
| 0.606915 | 1.420582 | 0.053963  | 1         | 1          | 3520 tags=59%, list=15%, signal=69% |
| 0.577177 | 1.419244 | 0.066318  | 1         | 1          | 4785 tags=56%, list=20%, signal=70% |
| 0.5274   | 1.41806  | 0.086667  | 1         | 1          | 1710 tags=35%, list=7%, signal=38%  |
| 0.509406 | 1.417695 | 0.047022  | 1         | 1          | 3313 tags=47%, list=14%, signal=55% |
| 0.646336 | 1.414467 | 0.08167   | 1         | 1          | 4486 tags=61%, list=19%, signal=75% |
| 0.44695  | 1.413051 | 0.005146  | 1         | 1          | 3897 tags=41%, list=17%, signal=49% |
| 0.494085 | 1.408886 | 0.029762  | 1         | 1          | 5291 tags=62%, list=23%, signal=80% |
| 0.544234 | 1.40763  | 0.041958  | 1         | 1          | 5391 tags=63%, list=23%, signal=82% |
| 0.602536 | 1.404729 | 0.085981  | 1         | 1          | 1236 tags=25%, list=5%, signal=26%  |
| 0.498275 | 1.401695 | 0.098993  | 1         | 1          | 3977 tags=38%, list=17%, signal=46% |
| 0.523636 | 1.398434 | 0.102178  | 1         | 1          | 1313 tags=33%, list=6%, signal=35%  |
| 0.597964 | 1.395762 | 0.085859  | 1         | 1          | 4009 tags=50%, list=17%, signal=60% |
| 0.517665 | 1.392352 | 0.056385  | 1         | 1          | 6598 tags=59%, list=28%, signal=82% |
| 0.556331 | 1.391015 | 0.059701  | 1         | 1          | 2847 tags=34%, list=12%, signal=39% |
| 0.483389 | 1.390908 | 0.086601  | 1         | 1          | 2417 tags=42%, list=10%, signal=47% |
| 0.520025 | 1.390236 | 0.055133  | 1         | 1          | 1802 tags=32%, list=8%, signal=34%  |
| 0.527433 | 1.378759 | 0.094444  | 1         | 1          | 5673 tags=67%, list=24%, signal=88% |
| 0.452378 | 1.378506 | 0.017065  | 1         | 1          | 3725 tags=41%, list=16%, signal=48% |
| 0.644528 | 1.377772 | 0.146691  | 1         | 1          | 6320 tags=73%, list=27%, signal=99% |
| 0.512538 | 1.376122 | 0.040541  | 1         | 1          | 6608 tags=59%, list=28%, signal=82% |
| 0.580406 | 1.375183 | 0.134513  | 1         | 1          | 6560 tags=66%, list=28%, signal=91% |
| 0.370577 | 1.37032  | 0.083607  | 1         | 1          | 4644 tags=38%, list=20%, signal=47% |
| 0.489269 | 1.367954 | 0.150838  | 1         | 1          | 5807 tags=59%, list=25%, signal=78% |
| 0.619253 | 1.367864 | 0.145129  | 1         | 1          | 4100 tags=47%, list=18%, signal=57% |
| 0.433237 | 1.367752 | 0.047945  | 1         | 1          | 5487 tags=42%, list=23%, signal=55% |
| 0.637017 | 1.366832 | 0.082192  | 1         | 1          | 3122 tags=41%, list=13%, signal=47% |
| 0.477196 | 1.365899 | 0.052464  | 1         | 1          | 4737 tags=47%, list=20%, signal=58% |
| 0.572904 | 1.362678 | 0.110294  | 1         | 1          | 6391 tags=61%, list=27%, signal=84% |

|          |          |          |   |   |                                      |
|----------|----------|----------|---|---|--------------------------------------|
| 0.505894 | 1.359484 | 0.089161 | 1 | 1 | 4008 tags=45%, list=17%, signal=54%  |
| 0.590537 | 1.357941 | 0.125461 | 1 | 1 | 3673 tags=60%, list=16%, signal=71%  |
| 0.40354  | 1.357871 | 0.02901  | 1 | 1 | 3233 tags=33%, list=14%, signal=39%  |
| 0.628716 | 1.357648 | 0.13447  | 1 | 1 | 4947 tags=47%, list=21%, signal=59%  |
| 0.546558 | 1.354487 | 0.086882 | 1 | 1 | 3725 tags=39%, list=16%, signal=46%  |
| 0.425918 | 1.351679 | 0.054795 | 1 | 1 | 3254 tags=38%, list=14%, signal=45%  |
| 0.491358 | 1.349196 | 0.156089 | 1 | 1 | 4708 tags=48%, list=20%, signal=59%  |
| 0.522608 | 1.347971 | 0.092496 | 1 | 1 | 3725 tags=42%, list=16%, signal=50%  |
| 0.496888 | 1.347184 | 0.15371  | 1 | 1 | 3536 tags=43%, list=15%, signal=51%  |
| 0.563286 | 1.343886 | 0.144246 | 1 | 1 | 5873 tags=63%, list=25%, signal=83%  |
| 0.49419  | 1.342458 | 0.094855 | 1 | 1 | 3496 tags=39%, list=15%, signal=46%  |
| 0.507774 | 1.341374 | 0.109244 | 1 | 1 | 4151 tags=45%, list=18%, signal=54%  |
| 0.513352 | 1.340498 | 0.089922 | 1 | 1 | 6304 tags=59%, list=27%, signal=81%  |
| 0.41168  | 1.339397 | 0.063574 | 1 | 1 | 5167 tags=49%, list=22%, signal=63%  |
| 0.425998 | 1.339114 | 0.103328 | 1 | 1 | 3368 tags=35%, list=14%, signal=41%  |
| 0.4086   | 1.335919 | 0.075286 | 1 | 1 | 4767 tags=41%, list=20%, signal=51%  |
| 0.404612 | 1.334177 | 0.055743 | 1 | 1 | 3647 tags=40%, list=16%, signal=48%  |
| 0.467583 | 1.329596 | 0.051887 | 1 | 1 | 6928 tags=52%, list=30%, signal=73%  |
| 0.450853 | 1.324943 | 0.172161 | 1 | 1 | 5590 tags=52%, list=24%, signal=68%  |
| 0.426247 | 1.324823 | 0.08121  | 1 | 1 | 2984 tags=33%, list=13%, signal=37%  |
| 0.563759 | 1.322628 | 0.132597 | 1 | 1 | 6412 tags=63%, list=27%, signal=86%  |
| 0.394216 | 1.32217  | 0.024038 | 1 | 1 | 5624 tags=47%, list=24%, signal=61%  |
| 0.492729 | 1.320863 | 0.108514 | 1 | 1 | 2932 tags=46%, list=13%, signal=53%  |
| 0.70448  | 1.319756 | 0.189139 | 1 | 1 | 5788 tags=85%, list=25%, signal=113% |
| 0.437    | 1.319027 | 0.117537 | 1 | 1 | 4285 tags=33%, list=18%, signal=41%  |
| 0.665636 | 1.318543 | 0.191205 | 1 | 1 | 6392 tags=77%, list=27%, signal=106% |
| 0.412273 | 1.315717 | 0.081129 | 1 | 1 | 3848 tags=39%, list=16%, signal=46%  |
| 0.410507 | 1.313461 | 0.120066 | 1 | 1 | 5796 tags=46%, list=25%, signal=62%  |
| 0.409899 | 1.313016 | 0.079861 | 1 | 1 | 4068 tags=33%, list=17%, signal=39%  |
| 0.458232 | 1.310551 | 0.141005 | 1 | 1 | 4991 tags=55%, list=21%, signal=69%  |
| 0.728193 | 1.308561 | 0.186508 | 1 | 1 | 4580 tags=80%, list=20%, signal=99%  |
| 0.474747 | 1.307475 | 0.055    | 1 | 1 | 3725 tags=43%, list=16%, signal=51%  |
| 0.594346 | 1.307417 | 0.180702 | 1 | 1 | 5796 tags=57%, list=25%, signal=75%  |
| 0.519234 | 1.30738  | 0.106646 | 1 | 1 | 5717 tags=63%, list=24%, signal=83%  |
| 0.565613 | 1.306791 | 0.151402 | 1 | 1 | 4702 tags=60%, list=20%, signal=75%  |
| 0.514219 | 1.305755 | 0.14733  | 1 | 1 | 3348 tags=42%, list=14%, signal=49%  |
| 0.459024 | 1.304135 | 0.100334 | 1 | 1 | 1937 tags=28%, list=8%, signal=30%   |
| 0.570925 | 1.303713 | 0.13059  | 1 | 1 | 7022 tags=68%, list=30%, signal=97%  |
| 0.679094 | 1.302692 | 0.22973  | 1 | 1 | 5246 tags=74%, list=22%, signal=96%  |
| 0.586319 | 1.301986 | 0.224335 | 1 | 1 | 7502 tags=70%, list=32%, signal=103% |
| 0.505813 | 1.298351 | 0.083893 | 1 | 1 | 3725 tags=53%, list=16%, signal=63%  |
| 0.567611 | 1.296745 | 0.152364 | 1 | 1 | 7022 tags=70%, list=30%, signal=100% |
| 0.407744 | 1.295323 | 0.051852 | 1 | 1 | 4193 tags=37%, list=18%, signal=45%  |
| 0.519816 | 1.293536 | 0.261818 | 1 | 1 | 5880 tags=50%, list=25%, signal=67%  |
| 0.420601 | 1.291432 | 0.144621 | 1 | 1 | 3602 tags=33%, list=15%, signal=39%  |
| 0.459948 | 1.290589 | 0.140962 | 1 | 1 | 2601 tags=32%, list=11%, signal=36%  |
| 0.403839 | 1.285979 | 0.108896 | 1 | 1 | 5868 tags=47%, list=25%, signal=63%  |
| 0.402873 | 1.285862 | 0.079872 | 1 | 1 | 3051 tags=26%, list=13%, signal=30%  |
| 0.416838 | 1.285383 | 0.06535  | 1 | 1 | 4038 tags=37%, list=17%, signal=44%  |
| 0.583336 | 1.284639 | 0.286252 | 1 | 1 | 5580 tags=63%, list=24%, signal=82%  |

|          |          |          |   |   |                                      |
|----------|----------|----------|---|---|--------------------------------------|
| 0.432992 | 1.282703 | 0.101881 | 1 | 1 | 4358 tags=38%, list=19%, signal=46%  |
| 0.410841 | 1.281529 | 0.116883 | 1 | 1 | 3554 tags=37%, list=15%, signal=43%  |
| 0.705808 | 1.281031 | 0.225989 | 1 | 1 | 5182 tags=83%, list=22%, signal=106% |
| 0.538319 | 1.280501 | 0.164602 | 1 | 1 | 6405 tags=72%, list=27%, signal=99%  |
| 0.524381 | 1.279896 | 0.171123 | 1 | 1 | 3921 tags=60%, list=17%, signal=72%  |
| 0.457433 | 1.279724 | 0.251838 | 1 | 1 | 5962 tags=51%, list=25%, signal=68%  |
| 0.445231 | 1.279227 | 0.199248 | 1 | 1 | 5348 tags=50%, list=23%, signal=64%  |
| 0.396857 | 1.277981 | 0.066919 | 1 | 1 | 1552 tags=27%, list=7%, signal=29%   |
| 0.473549 | 1.275229 | 0.139219 | 1 | 1 | 3082 tags=36%, list=13%, signal=42%  |
| 0.604926 | 1.27517  | 0.297989 | 1 | 1 | 5607 tags=67%, list=24%, signal=88%  |
| 0.430464 | 1.274636 | 0.11938  | 1 | 1 | 5501 tags=56%, list=23%, signal=73%  |
| 0.467474 | 1.274154 | 0.166362 | 1 | 1 | 5852 tags=60%, list=25%, signal=80%  |
| 0.390906 | 1.273772 | 0.117978 | 1 | 1 | 2654 tags=28%, list=11%, signal=32%  |
| 0.477035 | 1.272291 | 0.191829 | 1 | 1 | 6361 tags=57%, list=27%, signal=78%  |
| 0.578734 | 1.272157 | 0.363167 | 1 | 1 | 5880 tags=61%, list=25%, signal=82%  |
| 0.518779 | 1.271493 | 0.209262 | 1 | 1 | 4458 tags=55%, list=19%, signal=67%  |
| 0.355515 | 1.271427 | 0.056075 | 1 | 1 | 4412 tags=35%, list=19%, signal=43%  |
| 0.394554 | 1.271388 | 0.091772 | 1 | 1 | 3725 tags=34%, list=16%, signal=41%  |
| 0.455776 | 1.270634 | 0.207012 | 1 | 1 | 2712 tags=35%, list=12%, signal=40%  |
| 0.377884 | 1.269898 | 0.153014 | 1 | 1 | 5808 tags=53%, list=25%, signal=70%  |
| 0.604112 | 1.268078 | 0.3213   | 1 | 1 | 5607 tags=62%, list=24%, signal=81%  |
| 0.408191 | 1.266961 | 0.138632 | 1 | 1 | 6365 tags=58%, list=27%, signal=80%  |
| 0.466495 | 1.266311 | 0.150316 | 1 | 1 | 3342 tags=53%, list=14%, signal=62%  |
| 0.651398 | 1.266117 | 0.232824 | 1 | 1 | 7774 tags=88%, list=33%, signal=131% |
| 0.411937 | 1.265937 | 0.150641 | 1 | 1 | 6866 tags=51%, list=29%, signal=71%  |
| 0.519848 | 1.264281 | 0.196565 | 1 | 1 | 2409 tags=38%, list=10%, signal=42%  |
| 0.629135 | 1.263555 | 0.265537 | 1 | 1 | 5857 tags=76%, list=25%, signal=102% |
| 0.434749 | 1.259399 | 0.152685 | 1 | 1 | 2409 tags=30%, list=10%, signal=33%  |
| 0.488132 | 1.259005 | 0.197869 | 1 | 1 | 7092 tags=67%, list=30%, signal=96%  |
| 0.48515  | 1.258713 | 0.164983 | 1 | 1 | 1440 tags=29%, list=6%, signal=30%   |
| 0.358977 | 1.257662 | 0.118584 | 1 | 1 | 4410 tags=36%, list=19%, signal=44%  |
| 0.517125 | 1.254345 | 0.126488 | 1 | 1 | 7868 tags=79%, list=34%, signal=119% |
| 0.477057 | 1.254021 | 0.179245 | 1 | 1 | 5531 tags=53%, list=24%, signal=69%  |
| 0.613452 | 1.252378 | 0.273256 | 1 | 1 | 7808 tags=86%, list=33%, signal=129% |
| 0.408467 | 1.251862 | 0.20794  | 1 | 1 | 5776 tags=46%, list=25%, signal=61%  |
| 0.514729 | 1.251419 | 0.261682 | 1 | 1 | 3011 tags=38%, list=13%, signal=43%  |
| 0.564242 | 1.250853 | 0.328302 | 1 | 1 | 7330 tags=68%, list=31%, signal=99%  |
| 0.447135 | 1.250847 | 0.186087 | 1 | 1 | 6866 tags=48%, list=29%, signal=68%  |
| 0.412414 | 1.250538 | 0.172308 | 1 | 1 | 5831 tags=47%, list=25%, signal=63%  |
| 0.348667 | 1.250157 | 0.118297 | 1 | 1 | 4169 tags=37%, list=18%, signal=45%  |
| 0.423588 | 1.247696 | 0.248696 | 1 | 1 | 5612 tags=48%, list=24%, signal=62%  |
| 0.451088 | 1.247121 | 0.167752 | 1 | 1 | 2995 tags=40%, list=13%, signal=46%  |
| 0.70114  | 1.246304 | 0.271484 | 1 | 1 | 6320 tags=89%, list=27%, signal=122% |
| 0.470192 | 1.245229 | 0.230038 | 1 | 1 | 4100 tags=36%, list=18%, signal=43%  |
| 0.438647 | 1.244253 | 0.182906 | 1 | 1 | 2030 tags=37%, list=9%, signal=40%   |
| 0.549855 | 1.243172 | 0.24552  | 1 | 1 | 6320 tags=53%, list=27%, signal=72%  |
| 0.547912 | 1.242036 | 0.286957 | 1 | 1 | 3326 tags=45%, list=14%, signal=53%  |
| 0.499567 | 1.241752 | 0.207207 | 1 | 1 | 2413 tags=35%, list=10%, signal=39%  |
| 0.331273 | 1.24104  | 0.097879 | 1 | 1 | 4600 tags=33%, list=20%, signal=41%  |
| 0.439716 | 1.239585 | 0.166189 | 1 | 1 | 6634 tags=60%, list=28%, signal=84%  |

|          |          |          |   |   |                                      |
|----------|----------|----------|---|---|--------------------------------------|
| 0.557369 | 1.237357 | 0.259194 | 1 | 1 | 6591 tags=53%, list=28%, signal=74%  |
| 0.399471 | 1.235399 | 0.160494 | 1 | 1 | 2775 tags=32%, list=12%, signal=36%  |
| 0.68968  | 1.234324 | 0.281955 | 1 | 1 | 6320 tags=87%, list=27%, signal=119% |
| 0.680822 | 1.232782 | 0.265469 | 1 | 1 | 5182 tags=80%, list=22%, signal=103% |
| 0.564072 | 1.231775 | 0.254025 | 1 | 1 | 7358 tags=78%, list=31%, signal=113% |
| 0.414692 | 1.231443 | 0.150165 | 1 | 1 | 5857 tags=48%, list=25%, signal=63%  |
| 0.607428 | 1.230416 | 0.259259 | 1 | 1 | 1754 tags=50%, list=7%, signal=54%   |
| 0.685963 | 1.230272 | 0.308958 | 1 | 1 | 5943 tags=76%, list=25%, signal=102% |
| 0.349359 | 1.230058 | 0.154514 | 1 | 1 | 5540 tags=43%, list=24%, signal=56%  |
| 0.473755 | 1.229047 | 0.187994 | 1 | 1 | 5245 tags=48%, list=22%, signal=62%  |
| 0.358398 | 1.228789 | 0.076692 | 1 | 1 | 2738 tags=26%, list=12%, signal=29%  |
| 0.592587 | 1.228541 | 0.220826 | 1 | 1 | 6249 tags=60%, list=27%, signal=82%  |
| 0.494361 | 1.228057 | 0.216549 | 1 | 1 | 4628 tags=47%, list=20%, signal=59%  |
| 0.340199 | 1.226174 | 0.103093 | 1 | 1 | 3571 tags=30%, list=15%, signal=36%  |
| 0.436608 | 1.2256   | 0.207447 | 1 | 1 | 3320 tags=40%, list=14%, signal=47%  |
| 0.318149 | 1.225092 | 0.080357 | 1 | 1 | 3440 tags=29%, list=15%, signal=34%  |
| 0.454449 | 1.224878 | 0.181388 | 1 | 1 | 5813 tags=41%, list=25%, signal=55%  |
| 0.647665 | 1.22446  | 0.290385 | 1 | 1 | 5353 tags=73%, list=23%, signal=95%  |
| 0.429777 | 1.224425 | 0.246479 | 1 | 1 | 4575 tags=44%, list=20%, signal=55%  |
| 0.432742 | 1.224064 | 0.166667 | 1 | 1 | 4279 tags=51%, list=18%, signal=63%  |
| 0.497001 | 1.223812 | 0.226415 | 1 | 1 | 5283 tags=44%, list=23%, signal=57%  |
| 0.435023 | 1.223497 | 0.20177  | 1 | 1 | 2314 tags=33%, list=10%, signal=36%  |
| 0.596295 | 1.223472 | 0.243137 | 1 | 1 | 2110 tags=38%, list=9%, signal=42%   |
| 0.501734 | 1.221545 | 0.238434 | 1 | 1 | 5395 tags=47%, list=23%, signal=61%  |
| 0.372431 | 1.221539 | 0.131693 | 1 | 1 | 1187 tags=17%, list=5%, signal=18%   |
| 0.457459 | 1.221215 | 0.227826 | 1 | 1 | 7452 tags=71%, list=32%, signal=105% |
| 0.475543 | 1.220373 | 0.245318 | 1 | 1 | 3739 tags=44%, list=16%, signal=52%  |
| 0.551999 | 1.220052 | 0.269231 | 1 | 1 | 6095 tags=58%, list=26%, signal=78%  |
| 0.556659 | 1.218188 | 0.370229 | 1 | 1 | 7330 tags=69%, list=31%, signal=99%  |
| 0.464778 | 1.216737 | 0.21777  | 1 | 1 | 5852 tags=56%, list=25%, signal=75%  |
| 0.443206 | 1.215202 | 0.255238 | 1 | 1 | 5167 tags=47%, list=22%, signal=60%  |
| 0.336857 | 1.214811 | 0.143564 | 1 | 1 | 4509 tags=31%, list=19%, signal=38%  |
| 0.30998  | 1.214508 | 0.082781 | 1 | 1 | 3171 tags=24%, list=14%, signal=28%  |
| 0.484837 | 1.214402 | 0.254937 | 1 | 1 | 5874 tags=55%, list=25%, signal=74%  |
| 0.425299 | 1.214235 | 0.18     | 1 | 1 | 2279 tags=30%, list=10%, signal=34%  |
| 0.503749 | 1.214147 | 0.269531 | 1 | 1 | 5900 tags=53%, list=25%, signal=70%  |
| 0.449031 | 1.213463 | 0.292035 | 1 | 1 | 6074 tags=50%, list=26%, signal=67%  |
| 0.513523 | 1.21279  | 0.202381 | 1 | 1 | 4886 tags=59%, list=21%, signal=75%  |
| 0.55594  | 1.211214 | 0.254753 | 1 | 1 | 7774 tags=79%, list=33%, signal=117% |
| 0.387285 | 1.207764 | 0.175862 | 1 | 1 | 5882 tags=49%, list=25%, signal=65%  |
| 0.604051 | 1.207418 | 0.327715 | 1 | 1 | 5353 tags=66%, list=23%, signal=85%  |
| 0.362591 | 1.207005 | 0.195402 | 1 | 1 | 5555 tags=42%, list=24%, signal=55%  |
| 0.518108 | 1.20687  | 0.258348 | 1 | 1 | 5003 tags=47%, list=21%, signal=60%  |
| 0.354152 | 1.206425 | 0.229205 | 1 | 1 | 4333 tags=35%, list=19%, signal=43%  |
| 0.424994 | 1.206362 | 0.231579 | 1 | 1 | 5615 tags=52%, list=24%, signal=68%  |
| 0.427104 | 1.206191 | 0.245098 | 1 | 1 | 865 tags=20%, list=4%, signal=21%    |
| 0.465215 | 1.206021 | 0.213445 | 1 | 1 | 5838 tags=52%, list=25%, signal=69%  |
| 0.316379 | 1.205715 | 0.135621 | 1 | 1 | 2842 tags=24%, list=12%, signal=27%  |
| 0.472654 | 1.205243 | 0.274854 | 1 | 1 | 6866 tags=50%, list=29%, signal=71%  |
| 0.367313 | 1.205178 | 0.144781 | 1 | 1 | 5094 tags=34%, list=22%, signal=43%  |



|          |          |          |   |   |                                      |
|----------|----------|----------|---|---|--------------------------------------|
| 0.370921 | 1.205075 | 0.18705  | 1 | 1 | 3361 tags=33%, list=14%, signal=39%  |
| 0.293494 | 1.204484 | 0.06266  | 1 | 1 | 4436 tags=32%, list=19%, signal=38%  |
| 0.436291 | 1.203899 | 0.19702  | 1 | 1 | 2795 tags=44%, list=12%, signal=50%  |
| 0.418164 | 1.203817 | 0.19376  | 1 | 1 | 92 tags=13%, list=0%, signal=13%     |
| 0.57496  | 1.202803 | 0.322404 | 1 | 1 | 7805 tags=78%, list=33%, signal=117% |
| 0.518294 | 1.202452 | 0.314991 | 1 | 1 | 5718 tags=52%, list=24%, signal=69%  |
| 0.37098  | 1.202292 | 0.182131 | 1 | 1 | 6821 tags=50%, list=29%, signal=70%  |
| 0.384654 | 1.202075 | 0.178306 | 1 | 1 | 5831 tags=44%, list=25%, signal=58%  |
| 0.586221 | 1.201498 | 0.372477 | 1 | 1 | 4580 tags=63%, list=20%, signal=78%  |
| 0.442668 | 1.201305 | 0.220826 | 1 | 1 | 1496 tags=29%, list=6%, signal=31%   |
| 0.397084 | 1.199365 | 0.227907 | 1 | 1 | 4672 tags=43%, list=20%, signal=53%  |
| 0.407408 | 1.19883  | 0.193162 | 1 | 1 | 671 tags=18%, list=3%, signal=19%    |
| 0.307806 | 1.198478 | 0.103914 | 1 | 1 | 4483 tags=37%, list=19%, signal=46%  |
| 0.549074 | 1.196961 | 0.325279 | 1 | 1 | 5875 tags=65%, list=25%, signal=86%  |
| 0.419948 | 1.196957 | 0.155449 | 1 | 1 | 2816 tags=32%, list=12%, signal=36%  |
| 0.441004 | 1.196938 | 0.243243 | 1 | 1 | 5503 tags=46%, list=23%, signal=60%  |
| 0.338237 | 1.196729 | 0.129518 | 1 | 1 | 5717 tags=44%, list=24%, signal=58%  |
| 0.465772 | 1.196561 | 0.256778 | 1 | 1 | 4952 tags=52%, list=21%, signal=66%  |
| 0.439138 | 1.195811 | 0.208824 | 1 | 1 | 2145 tags=29%, list=9%, signal=31%   |
| 0.357766 | 1.192867 | 0.159057 | 1 | 1 | 1614 tags=28%, list=7%, signal=30%   |
| 0.40995  | 1.191819 | 0.268376 | 1 | 1 | 3631 tags=33%, list=16%, signal=39%  |
| 0.424315 | 1.191651 | 0.293624 | 1 | 1 | 6279 tags=59%, list=27%, signal=80%  |
| 0.433295 | 1.191449 | 0.300178 | 1 | 1 | 7525 tags=59%, list=32%, signal=87%  |
| 0.356367 | 1.190032 | 0.176471 | 1 | 1 | 4321 tags=39%, list=18%, signal=48%  |
| 0.496872 | 1.189727 | 0.328996 | 1 | 1 | 6137 tags=50%, list=26%, signal=68%  |
| 0.486747 | 1.189644 | 0.354015 | 1 | 1 | 5432 tags=52%, list=23%, signal=67%  |
| 0.423562 | 1.189334 | 0.187296 | 1 | 1 | 3725 tags=36%, list=16%, signal=43%  |
| 0.452406 | 1.189111 | 0.349177 | 1 | 1 | 5665 tags=52%, list=24%, signal=68%  |
| 0.335457 | 1.188544 | 0.176211 | 1 | 1 | 4647 tags=39%, list=20%, signal=49%  |
| 0.375859 | 1.18773  | 0.201493 | 1 | 1 | 3276 tags=31%, list=14%, signal=36%  |
| 0.390253 | 1.187169 | 0.193069 | 1 | 1 | 5643 tags=43%, list=24%, signal=57%  |
| 0.312322 | 1.186791 | 0.190549 | 1 | 1 | 5744 tags=41%, list=25%, signal=53%  |
| 0.387965 | 1.186491 | 0.180851 | 1 | 1 | 3878 tags=37%, list=17%, signal=44%  |
| 0.45445  | 1.185113 | 0.238422 | 1 | 1 | 1026 tags=22%, list=4%, signal=23%   |
| 0.528636 | 1.184873 | 0.258224 | 1 | 1 | 6612 tags=45%, list=28%, signal=63%  |
| 0.55079  | 1.183304 | 0.414159 | 1 | 1 | 5880 tags=56%, list=25%, signal=75%  |
| 0.376272 | 1.182667 | 0.172131 | 1 | 1 | 1442 tags=19%, list=6%, signal=20%   |
| 0.346912 | 1.180959 | 0.163328 | 1 | 1 | 6513 tags=45%, list=28%, signal=63%  |
| 0.455502 | 1.179856 | 0.269982 | 1 | 1 | 6006 tags=60%, list=26%, signal=81%  |
| 0.535355 | 1.17816  | 0.291727 | 1 | 1 | 6914 tags=71%, list=30%, signal=100% |
| 0.346563 | 1.178012 | 0.197248 | 1 | 1 | 2798 tags=32%, list=12%, signal=36%  |
| 0.380119 | 1.176412 | 0.214176 | 1 | 1 | 4839 tags=43%, list=21%, signal=54%  |
| 0.378779 | 1.176121 | 0.226937 | 1 | 1 | 4489 tags=42%, list=19%, signal=52%  |
| 0.445435 | 1.175512 | 0.230384 | 1 | 1 | 5575 tags=55%, list=24%, signal=72%  |
| 0.505811 | 1.173893 | 0.278899 | 1 | 1 | 5993 tags=53%, list=26%, signal=71%  |
| 0.313882 | 1.173883 | 0.129679 | 1 | 1 | 794 tags=15%, list=3%, signal=16%    |
| 0.530161 | 1.172924 | 0.340824 | 1 | 1 | 6281 tags=60%, list=27%, signal=82%  |
| 0.345401 | 1.172685 | 0.201893 | 1 | 1 | 4338 tags=37%, list=19%, signal=45%  |
| 0.351913 | 1.17113  | 0.156442 | 1 | 1 | 1568 tags=22%, list=7%, signal=24%   |
| 0.523309 | 1.171056 | 0.263538 | 1 | 1 | 4233 tags=43%, list=18%, signal=52%  |

|          |          |          |   |   |                                      |
|----------|----------|----------|---|---|--------------------------------------|
| 0.342939 | 1.170863 | 0.164521 | 1 | 1 | 2795 tags=27%, list=12%, signal=31%  |
| 0.34553  | 1.170851 | 0.232082 | 1 | 1 | 3320 tags=32%, list=14%, signal=36%  |
| 0.368859 | 1.170462 | 0.213333 | 1 | 1 | 4666 tags=37%, list=20%, signal=46%  |
| 0.341882 | 1.170287 | 0.206897 | 1 | 1 | 5675 tags=45%, list=24%, signal=59%  |
| 0.353037 | 1.169285 | 0.213166 | 1 | 1 | 5555 tags=42%, list=24%, signal=55%  |
| 0.504104 | 1.169249 | 0.256735 | 1 | 1 | 3432 tags=44%, list=15%, signal=52%  |
| 0.477836 | 1.169025 | 0.257749 | 1 | 1 | 6152 tags=43%, list=26%, signal=59%  |
| 0.482257 | 1.168065 | 0.373626 | 1 | 1 | 5880 tags=48%, list=25%, signal=64%  |
| 0.532591 | 1.168015 | 0.411321 | 1 | 1 | 7174 tags=62%, list=31%, signal=89%  |
| 0.349147 | 1.16762  | 0.181818 | 1 | 1 | 4641 tags=38%, list=20%, signal=47%  |
| 0.631825 | 1.167273 | 0.377863 | 1 | 1 | 7437 tags=78%, list=32%, signal=115% |
| 0.561725 | 1.167192 | 0.338462 | 1 | 1 | 7358 tags=75%, list=31%, signal=109% |
| 0.466296 | 1.16696  | 0.344643 | 1 | 1 | 5647 tags=59%, list=24%, signal=77%  |
| 0.506519 | 1.166306 | 0.296361 | 1 | 1 | 6840 tags=67%, list=29%, signal=94%  |
| 0.405596 | 1.166174 | 0.223333 | 1 | 1 | 3878 tags=40%, list=17%, signal=48%  |
| 0.33873  | 1.165922 | 0.232682 | 1 | 1 | 5615 tags=45%, list=24%, signal=59%  |
| 0.309707 | 1.165445 | 0.178849 | 1 | 1 | 3105 tags=27%, list=13%, signal=31%  |
| 0.475372 | 1.165083 | 0.294521 | 1 | 1 | 4478 tags=44%, list=19%, signal=54%  |
| 0.318972 | 1.16472  | 0.191395 | 1 | 1 | 5962 tags=45%, list=25%, signal=59%  |
| 0.549007 | 1.163082 | 0.3049   | 1 | 1 | 3667 tags=43%, list=16%, signal=51%  |
| 0.385059 | 1.162396 | 0.276423 | 1 | 1 | 6225 tags=51%, list=27%, signal=70%  |
| 0.416229 | 1.16225  | 0.248418 | 1 | 1 | 2270 tags=31%, list=10%, signal=35%  |
| 0.447231 | 1.161597 | 0.345283 | 1 | 1 | 6320 tags=53%, list=27%, signal=72%  |
| 0.344216 | 1.161354 | 0.249191 | 1 | 1 | 3993 tags=34%, list=17%, signal=40%  |
| 0.464086 | 1.161059 | 0.234589 | 1 | 1 | 2320 tags=26%, list=10%, signal=29%  |
| 0.391469 | 1.160768 | 0.231041 | 1 | 1 | 2966 tags=32%, list=13%, signal=36%  |
| 0.497711 | 1.159677 | 0.3      | 1 | 1 | 7448 tags=61%, list=32%, signal=90%  |
| 0.395448 | 1.158466 | 0.305357 | 1 | 1 | 5828 tags=53%, list=25%, signal=70%  |
| 0.434559 | 1.158255 | 0.277338 | 1 | 1 | 1277 tags=33%, list=5%, signal=35%   |
| 0.566468 | 1.15712  | 0.356239 | 1 | 1 | 6074 tags=53%, list=26%, signal=72%  |
| 0.541023 | 1.155604 | 0.33829  | 1 | 1 | 6914 tags=67%, list=30%, signal=94%  |
| 0.320704 | 1.155467 | 0.182222 | 1 | 1 | 3391 tags=35%, list=14%, signal=40%  |
| 0.392744 | 1.155467 | 0.249551 | 1 | 1 | 5930 tags=47%, list=25%, signal=62%  |
| 0.377768 | 1.155214 | 0.257475 | 1 | 1 | 4641 tags=44%, list=20%, signal=54%  |
| 0.381941 | 1.155125 | 0.250923 | 1 | 1 | 2590 tags=29%, list=11%, signal=32%  |
| 0.318983 | 1.154979 | 0.210435 | 1 | 1 | 5651 tags=41%, list=24%, signal=54%  |
| 0.603896 | 1.154793 | 0.334477 | 1 | 1 | 4761 tags=73%, list=20%, signal=92%  |
| 0.380659 | 1.153437 | 0.259615 | 1 | 1 | 5870 tags=47%, list=25%, signal=63%  |
| 0.500958 | 1.153187 | 0.353464 | 1 | 1 | 7774 tags=71%, list=33%, signal=106% |
| 0.520322 | 1.153089 | 0.325714 | 1 | 1 | 5875 tags=58%, list=25%, signal=77%  |
| 0.484088 | 1.152804 | 0.345631 | 1 | 1 | 7559 tags=69%, list=32%, signal=102% |
| 0.490847 | 1.152658 | 0.403738 | 1 | 1 | 4811 tags=49%, list=21%, signal=62%  |
| 0.410948 | 1.152334 | 0.246777 | 1 | 1 | 5426 tags=48%, list=23%, signal=62%  |
| 0.694712 | 1.152265 | 0.382692 | 1 | 1 | 5552 tags=78%, list=24%, signal=102% |
| 0.518393 | 1.152193 | 0.377495 | 1 | 1 | 5246 tags=58%, list=22%, signal=75%  |
| 0.616338 | 1.151848 | 0.377691 | 1 | 1 | 4673 tags=71%, list=20%, signal=88%  |
| 0.34876  | 1.151725 | 0.214724 | 1 | 1 | 5880 tags=44%, list=25%, signal=58%  |
| 0.367725 | 1.151522 | 0.22292  | 1 | 1 | 2726 tags=30%, list=12%, signal=33%  |
| 0.48213  | 1.151265 | 0.325581 | 1 | 1 | 5875 tags=58%, list=25%, signal=77%  |
| 0.404657 | 1.151079 | 0.232278 | 1 | 1 | 2048 tags=41%, list=9%, signal=45%   |

|          |          |          |   |   |                                      |
|----------|----------|----------|---|---|--------------------------------------|
| 0.350173 | 1.150957 | 0.275387 | 1 | 1 | 4641 tags=37%, list=20%, signal=46%  |
| 0.372561 | 1.150559 | 0.292064 | 1 | 1 | 5703 tags=50%, list=24%, signal=66%  |
| 0.326832 | 1.150247 | 0.195382 | 1 | 1 | 1959 tags=20%, list=8%, signal=22%   |
| 0.622363 | 1.149125 | 0.352294 | 1 | 1 | 5516 tags=56%, list=24%, signal=73%  |
| 0.434707 | 1.148351 | 0.379859 | 1 | 1 | 5962 tags=57%, list=25%, signal=76%  |
| 0.473028 | 1.147823 | 0.308348 | 1 | 1 | 2989 tags=30%, list=13%, signal=34%  |
| 0.295577 | 1.14733  | 0.15505  | 1 | 1 | 4238 tags=28%, list=18%, signal=34%  |
| 0.341811 | 1.147307 | 0.242089 | 1 | 1 | 3833 tags=32%, list=16%, signal=38%  |
| 0.304016 | 1.147272 | 0.247387 | 1 | 1 | 5442 tags=35%, list=23%, signal=45%  |
| 0.370517 | 1.146578 | 0.309603 | 1 | 1 | 6011 tags=52%, list=26%, signal=69%  |
| 0.559375 | 1.146435 | 0.379699 | 1 | 1 | 5861 tags=60%, list=25%, signal=80%  |
| 0.347727 | 1.144914 | 0.239063 | 1 | 1 | 4268 tags=39%, list=18%, signal=47%  |
| 0.299018 | 1.143734 | 0.188406 | 1 | 1 | 4183 tags=35%, list=18%, signal=42%  |
| 0.422921 | 1.143343 | 0.277865 | 1 | 1 | 2902 tags=38%, list=12%, signal=43%  |
| 0.538846 | 1.143153 | 0.36414  | 1 | 1 | 4560 tags=63%, list=19%, signal=78%  |
| 0.579687 | 1.142947 | 0.416507 | 1 | 1 | 7330 tags=72%, list=31%, signal=105% |
| 0.422977 | 1.142236 | 0.295337 | 1 | 1 | 3419 tags=29%, list=15%, signal=34%  |
| 0.581549 | 1.142078 | 0.422349 | 1 | 1 | 7808 tags=79%, list=33%, signal=118% |
| 0.425037 | 1.141577 | 0.360485 | 1 | 1 | 5918 tags=52%, list=25%, signal=69%  |
| 0.334312 | 1.140726 | 0.233279 | 1 | 1 | 6134 tags=44%, list=26%, signal=59%  |
| 0.488324 | 1.13976  | 0.32316  | 1 | 1 | 5719 tags=51%, list=24%, signal=68%  |
| 0.541028 | 1.138329 | 0.356164 | 1 | 1 | 8074 tags=68%, list=34%, signal=103% |
| 0.337328 | 1.137824 | 0.283531 | 1 | 1 | 1766 tags=23%, list=8%, signal=25%   |
| 0.502693 | 1.137111 | 0.411335 | 1 | 1 | 6281 tags=61%, list=27%, signal=82%  |
| 0.351745 | 1.136738 | 0.283972 | 1 | 1 | 5899 tags=43%, list=25%, signal=58%  |
| 0.314568 | 1.136679 | 0.249164 | 1 | 1 | 2676 tags=20%, list=11%, signal=23%  |
| 0.481874 | 1.13652  | 0.355009 | 1 | 1 | 6539 tags=57%, list=28%, signal=78%  |
| 0.481412 | 1.136265 | 0.383636 | 1 | 1 | 6006 tags=59%, list=26%, signal=79%  |
| 0.577185 | 1.136073 | 0.358349 | 1 | 1 | 5571 tags=57%, list=24%, signal=74%  |
| 0.382357 | 1.135963 | 0.370236 | 1 | 1 | 5895 tags=44%, list=25%, signal=58%  |
| 0.53729  | 1.135358 | 0.4      | 1 | 1 | 4952 tags=57%, list=21%, signal=72%  |
| 0.413746 | 1.134798 | 0.362816 | 1 | 1 | 5855 tags=45%, list=25%, signal=59%  |
| 0.41364  | 1.133659 | 0.33211  | 1 | 1 | 5714 tags=41%, list=24%, signal=54%  |
| 0.489158 | 1.133642 | 0.366541 | 1 | 1 | 5026 tags=41%, list=21%, signal=52%  |
| 0.335732 | 1.132679 | 0.229277 | 1 | 1 | 3976 tags=36%, list=17%, signal=43%  |
| 0.395215 | 1.132407 | 0.253012 | 1 | 1 | 5651 tags=54%, list=24%, signal=71%  |
| 0.336262 | 1.131578 | 0.215625 | 1 | 1 | 6539 tags=43%, list=28%, signal=60%  |
| 0.386704 | 1.131309 | 0.298182 | 1 | 1 | 4519 tags=39%, list=19%, signal=49%  |
| 0.465071 | 1.13027  | 0.301109 | 1 | 1 | 5044 tags=50%, list=22%, signal=64%  |
| 0.385191 | 1.13022  | 0.287319 | 1 | 1 | 3415 tags=38%, list=15%, signal=44%  |
| 0.488971 | 1.129887 | 0.318482 | 1 | 1 | 7965 tags=45%, list=34%, signal=68%  |
| 0.546871 | 1.129463 | 0.38716  | 1 | 1 | 6500 tags=62%, list=28%, signal=85%  |
| 0.372695 | 1.128864 | 0.264085 | 1 | 1 | 2413 tags=21%, list=10%, signal=23%  |
| 0.412679 | 1.1288   | 0.344948 | 1 | 1 | 6849 tags=53%, list=29%, signal=75%  |
| 0.492783 | 1.128389 | 0.412587 | 1 | 1 | 7874 tags=67%, list=34%, signal=100% |
| 0.36733  | 1.128198 | 0.261164 | 1 | 1 | 2015 tags=27%, list=9%, signal=30%   |
| 0.366057 | 1.128164 | 0.226974 | 1 | 1 | 1466 tags=25%, list=6%, signal=27%   |
| 0.356478 | 1.127595 | 0.241265 | 1 | 1 | 2733 tags=28%, list=12%, signal=32%  |
| 0.360763 | 1.127569 | 0.21626  | 1 | 1 | 3177 tags=34%, list=14%, signal=40%  |
| 0.532171 | 1.12667  | 0.427305 | 1 | 1 | 5880 tags=56%, list=25%, signal=74%  |

|          |          |          |   |   |                                      |
|----------|----------|----------|---|---|--------------------------------------|
| 0.343431 | 1.126585 | 0.239812 | 1 | 1 | 5291 tags=36%, list=23%, signal=46%  |
| 0.343689 | 1.126559 | 0.2832   | 1 | 1 | 4641 tags=38%, list=20%, signal=47%  |
| 0.448868 | 1.12589  | 0.322148 | 1 | 1 | 5932 tags=61%, list=25%, signal=82%  |
| 0.308776 | 1.125588 | 0.250426 | 1 | 1 | 4945 tags=36%, list=21%, signal=45%  |
| 0.347341 | 1.125418 | 0.268489 | 1 | 1 | 6369 tags=49%, list=27%, signal=68%  |
| 0.429303 | 1.124524 | 0.348797 | 1 | 1 | 5952 tags=63%, list=25%, signal=84%  |
| 0.671154 | 1.124439 | 0.3583   | 1 | 1 | 6074 tags=69%, list=26%, signal=93%  |
| 0.354381 | 1.123786 | 0.258752 | 1 | 1 | 5428 tags=46%, list=23%, signal=60%  |
| 0.283413 | 1.123018 | 0.218155 | 1 | 1 | 5540 tags=34%, list=24%, signal=45%  |
| 0.291825 | 1.122872 | 0.172205 | 1 | 1 | 5544 tags=40%, list=24%, signal=52%  |
| 0.393856 | 1.122821 | 0.363793 | 1 | 1 | 4694 tags=41%, list=20%, signal=51%  |
| 0.316749 | 1.121934 | 0.304348 | 1 | 1 | 5426 tags=40%, list=23%, signal=51%  |
| 0.376265 | 1.121914 | 0.280936 | 1 | 1 | 2099 tags=24%, list=9%, signal=26%   |
| 0.493335 | 1.121603 | 0.409449 | 1 | 1 | 5788 tags=58%, list=25%, signal=77%  |
| 0.471102 | 1.120632 | 0.349727 | 1 | 1 | 6539 tags=57%, list=28%, signal=79%  |
| 0.406141 | 1.120197 | 0.268466 | 1 | 1 | 6462 tags=53%, list=28%, signal=73%  |
| 0.426194 | 1.120048 | 0.392857 | 1 | 1 | 5716 tags=42%, list=24%, signal=56%  |
| 0.494233 | 1.119687 | 0.407678 | 1 | 1 | 5428 tags=57%, list=23%, signal=74%  |
| 0.465071 | 1.119519 | 0.328302 | 1 | 1 | 6257 tags=46%, list=27%, signal=63%  |
| 0.447327 | 1.117703 | 0.316742 | 1 | 1 | 4627 tags=38%, list=20%, signal=47%  |
| 0.561691 | 1.115779 | 0.434211 | 1 | 1 | 7437 tags=67%, list=32%, signal=98%  |
| 0.353337 | 1.115538 | 0.285484 | 1 | 1 | 5219 tags=42%, list=22%, signal=54%  |
| 0.416682 | 1.115266 | 0.302491 | 1 | 1 | 2338 tags=29%, list=10%, signal=32%  |
| 0.557209 | 1.115221 | 0.398467 | 1 | 1 | 7453 tags=72%, list=32%, signal=106% |
| 0.341146 | 1.115128 | 0.303544 | 1 | 1 | 3995 tags=35%, list=17%, signal=42%  |
| 0.557696 | 1.114614 | 0.424242 | 1 | 1 | 7847 tags=75%, list=34%, signal=113% |
| 0.4815   | 1.114264 | 0.390019 | 1 | 1 | 5020 tags=45%, list=21%, signal=57%  |
| 0.378759 | 1.11363  | 0.357143 | 1 | 1 | 7033 tags=49%, list=30%, signal=69%  |
| 0.468996 | 1.113294 | 0.354955 | 1 | 1 | 5873 tags=53%, list=25%, signal=71%  |
| 0.424698 | 1.112694 | 0.373494 | 1 | 1 | 7792 tags=55%, list=33%, signal=82%  |
| 0.385342 | 1.112367 | 0.296684 | 1 | 1 | 3364 tags=29%, list=14%, signal=34%  |
| 0.392837 | 1.112222 | 0.355401 | 1 | 1 | 3330 tags=35%, list=14%, signal=40%  |
| 0.383097 | 1.111532 | 0.314516 | 1 | 1 | 4683 tags=44%, list=20%, signal=56%  |
| 0.544765 | 1.110977 | 0.451977 | 1 | 1 | 5552 tags=56%, list=24%, signal=73%  |
| 0.471512 | 1.109428 | 0.399635 | 1 | 1 | 5428 tags=54%, list=23%, signal=70%  |
| 0.358621 | 1.109373 | 0.2592   | 1 | 1 | 3415 tags=34%, list=15%, signal=40%  |
| 0.383631 | 1.107238 | 0.340909 | 1 | 1 | 1796 tags=25%, list=8%, signal=27%   |
| 0.445348 | 1.106882 | 0.374101 | 1 | 1 | 7502 tags=66%, list=32%, signal=96%  |
| 0.477409 | 1.106407 | 0.401852 | 1 | 1 | 5788 tags=58%, list=25%, signal=77%  |
| 0.300996 | 1.106201 | 0.281583 | 1 | 1 | 5860 tags=44%, list=25%, signal=58%  |
| 0.362407 | 1.105614 | 0.309859 | 1 | 1 | 5859 tags=50%, list=25%, signal=67%  |
| 0.335563 | 1.105579 | 0.316071 | 1 | 1 | 2145 tags=21%, list=9%, signal=24%   |
| 0.415246 | 1.104441 | 0.428319 | 1 | 1 | 7341 tags=57%, list=31%, signal=83%  |
| 0.319787 | 1.104296 | 0.335593 | 1 | 1 | 5971 tags=40%, list=25%, signal=53%  |
| 0.381886 | 1.103598 | 0.303704 | 1 | 1 | 2142 tags=30%, list=9%, signal=33%   |
| 0.405078 | 1.103468 | 0.329231 | 1 | 1 | 2761 tags=35%, list=12%, signal=40%  |
| 0.495353 | 1.103242 | 0.33279  | 1 | 1 | 1671 tags=40%, list=7%, signal=43%   |
| 0.314306 | 1.102811 | 0.267356 | 1 | 1 | 4074 tags=36%, list=17%, signal=43%  |
| 0.457315 | 1.102623 | 0.32963  | 1 | 1 | 7847 tags=64%, list=34%, signal=96%  |
| 0.304463 | 1.101854 | 0.254786 | 1 | 1 | 5482 tags=35%, list=23%, signal=46%  |

|          |          |          |   |   |                                      |
|----------|----------|----------|---|---|--------------------------------------|
| 0.37011  | 1.100541 | 0.313916 | 1 | 1 | 4127 tags=41%, list=18%, signal=50%  |
| 0.447815 | 1.100527 | 0.359401 | 1 | 1 | 4630 tags=38%, list=20%, signal=47%  |
| 0.392342 | 1.100308 | 0.378378 | 1 | 1 | 5246 tags=44%, list=22%, signal=56%  |
| 0.423825 | 1.10022  | 0.393258 | 1 | 1 | 5899 tags=49%, list=25%, signal=65%  |
| 0.4348   | 1.100114 | 0.409253 | 1 | 1 | 6291 tags=56%, list=27%, signal=75%  |
| 0.354301 | 1.100113 | 0.345428 | 1 | 1 | 2338 tags=33%, list=10%, signal=37%  |
| 0.37587  | 1.099804 | 0.361624 | 1 | 1 | 4731 tags=41%, list=20%, signal=50%  |
| 0.4729   | 1.099163 | 0.406427 | 1 | 1 | 5719 tags=57%, list=24%, signal=75%  |
| 0.415842 | 1.098556 | 0.357274 | 1 | 1 | 3897 tags=36%, list=17%, signal=44%  |
| 0.305298 | 1.098105 | 0.280587 | 1 | 1 | 4896 tags=35%, list=21%, signal=44%  |
| 0.31581  | 1.097811 | 0.290476 | 1 | 1 | 6412 tags=46%, list=27%, signal=64%  |
| 0.40074  | 1.09668  | 0.32363  | 1 | 1 | 2792 tags=38%, list=12%, signal=43%  |
| 0.369127 | 1.096647 | 0.299342 | 1 | 1 | 3134 tags=26%, list=13%, signal=30%  |
| 0.418298 | 1.096094 | 0.391844 | 1 | 1 | 2972 tags=29%, list=13%, signal=33%  |
| 0.537307 | 1.095837 | 0.379576 | 1 | 1 | 6868 tags=76%, list=29%, signal=108% |
| 0.294448 | 1.095347 | 0.272464 | 1 | 1 | 5418 tags=34%, list=23%, signal=44%  |
| 0.426683 | 1.0953   | 0.338409 | 1 | 1 | 2813 tags=28%, list=12%, signal=32%  |
| 0.409092 | 1.094987 | 0.404762 | 1 | 1 | 4329 tags=38%, list=18%, signal=46%  |
| 0.415436 | 1.094263 | 0.310236 | 1 | 1 | 5714 tags=46%, list=24%, signal=61%  |
| 0.30822  | 1.093985 | 0.281159 | 1 | 1 | 5715 tags=35%, list=24%, signal=47%  |
| 0.420716 | 1.0935   | 0.361818 | 1 | 1 | 6006 tags=45%, list=26%, signal=60%  |
| 0.498185 | 1.0919   | 0.434535 | 1 | 1 | 5607 tags=54%, list=24%, signal=70%  |
| 0.413494 | 1.091847 | 0.402647 | 1 | 1 | 5313 tags=43%, list=23%, signal=56%  |
| 0.440761 | 1.091777 | 0.360485 | 1 | 1 | 6612 tags=55%, list=28%, signal=76%  |
| 0.308853 | 1.091618 | 0.313433 | 1 | 1 | 2765 tags=28%, list=12%, signal=32%  |
| 0.415669 | 1.091041 | 0.398564 | 1 | 1 | 7204 tags=56%, list=31%, signal=81%  |
| 0.450623 | 1.090731 | 0.382671 | 1 | 1 | 4533 tags=44%, list=19%, signal=54%  |
| 0.397237 | 1.090085 | 0.344762 | 1 | 1 | 5884 tags=53%, list=25%, signal=71%  |
| 0.586693 | 1.089782 | 0.434363 | 1 | 1 | 7437 tags=72%, list=32%, signal=105% |
| 0.446981 | 1.089274 | 0.366609 | 1 | 1 | 7255 tags=47%, list=31%, signal=68%  |
| 0.397415 | 1.088904 | 0.381679 | 1 | 1 | 6291 tags=49%, list=27%, signal=66%  |
| 0.547246 | 1.088204 | 0.450758 | 1 | 1 | 7865 tags=71%, list=34%, signal=106% |
| 0.361632 | 1.08767  | 0.340909 | 1 | 1 | 1280 tags=18%, list=5%, signal=19%   |
| 0.357041 | 1.086995 | 0.300614 | 1 | 1 | 3725 tags=29%, list=16%, signal=34%  |
| 0.351718 | 1.086254 | 0.331126 | 1 | 1 | 5909 tags=46%, list=25%, signal=61%  |
| 0.330939 | 1.085494 | 0.324841 | 1 | 1 | 5717 tags=44%, list=24%, signal=58%  |
| 0.54348  | 1.084543 | 0.425183 | 1 | 1 | 6868 tags=66%, list=29%, signal=93%  |
| 0.374966 | 1.083941 | 0.314516 | 1 | 1 | 4494 tags=40%, list=19%, signal=49%  |
| 0.301239 | 1.08353  | 0.341385 | 1 | 1 | 6423 tags=38%, list=27%, signal=53%  |
| 0.444452 | 1.083197 | 0.332149 | 1 | 1 | 1396 tags=25%, list=6%, signal=27%   |
| 0.378978 | 1.082822 | 0.381555 | 1 | 1 | 3419 tags=27%, list=15%, signal=31%  |
| 0.335553 | 1.082738 | 0.311522 | 1 | 1 | 2902 tags=29%, list=12%, signal=33%  |
| 0.374391 | 1.08183  | 0.298555 | 1 | 1 | 3164 tags=24%, list=14%, signal=28%  |
| 0.324532 | 1.081633 | 0.361854 | 1 | 1 | 5915 tags=42%, list=25%, signal=56%  |
| 0.422086 | 1.08145  | 0.393414 | 1 | 1 | 2479 tags=29%, list=11%, signal=33%  |
| 0.401949 | 1.081184 | 0.420792 | 1 | 1 | 473 tags=16%, list=2%, signal=16%    |
| 0.368088 | 1.080802 | 0.342857 | 1 | 1 | 1313 tags=24%, list=6%, signal=26%   |
| 0.484053 | 1.080739 | 0.464491 | 1 | 1 | 7452 tags=64%, list=32%, signal=94%  |
| 0.472348 | 1.080598 | 0.415441 | 1 | 1 | 5428 tags=57%, list=23%, signal=74%  |
| 0.338383 | 1.080366 | 0.332797 | 1 | 1 | 5584 tags=42%, list=24%, signal=55%  |

|          |          |          |   |   |                                      |
|----------|----------|----------|---|---|--------------------------------------|
| 0.418538 | 1.079854 | 0.358209 | 1 | 1 | 5872 tags=48%, list=25%, signal=64%  |
| 0.384745 | 1.079206 | 0.335453 | 1 | 1 | 5465 tags=38%, list=23%, signal=50%  |
| 0.307062 | 1.07902  | 0.279699 | 1 | 1 | 1898 tags=23%, list=8%, signal=25%   |
| 0.397684 | 1.078901 | 0.370618 | 1 | 1 | 5860 tags=46%, list=25%, signal=61%  |
| 0.31564  | 1.078598 | 0.304821 | 1 | 1 | 1581 tags=22%, list=7%, signal=24%   |
| 0.411382 | 1.078482 | 0.384083 | 1 | 1 | 2812 tags=35%, list=12%, signal=40%  |
| 0.354857 | 1.078053 | 0.311295 | 1 | 1 | 4573 tags=33%, list=20%, signal=41%  |
| 0.414948 | 1.077661 | 0.349291 | 1 | 1 | 9034 tags=74%, list=39%, signal=120% |
| 0.333358 | 1.077527 | 0.31562  | 1 | 1 | 5941 tags=42%, list=25%, signal=57%  |
| 0.431063 | 1.077182 | 0.394654 | 1 | 1 | 5504 tags=52%, list=24%, signal=68%  |
| 0.354739 | 1.077112 | 0.359168 | 1 | 1 | 4706 tags=33%, list=20%, signal=40%  |
| 0.43067  | 1.076878 | 0.441989 | 1 | 1 | 5834 tags=58%, list=25%, signal=77%  |
| 0.359323 | 1.076604 | 0.322581 | 1 | 1 | 2692 tags=35%, list=11%, signal=39%  |
| 0.416658 | 1.076382 | 0.427562 | 1 | 1 | 5943 tags=50%, list=25%, signal=67%  |
| 0.293323 | 1.075535 | 0.305707 | 1 | 1 | 4953 tags=37%, list=21%, signal=47%  |
| 0.411003 | 1.075384 | 0.40884  | 1 | 1 | 5590 tags=50%, list=24%, signal=65%  |
| 0.313511 | 1.075344 | 0.328947 | 1 | 1 | 5796 tags=39%, list=25%, signal=52%  |
| 0.443118 | 1.075185 | 0.411559 | 1 | 1 | 5613 tags=54%, list=24%, signal=71%  |
| 0.419747 | 1.073459 | 0.396797 | 1 | 1 | 5352 tags=42%, list=23%, signal=54%  |
| 0.402805 | 1.073335 | 0.396022 | 1 | 1 | 5525 tags=47%, list=24%, signal=62%  |
| 0.588659 | 1.073014 | 0.478599 | 1 | 1 | 5861 tags=59%, list=25%, signal=78%  |
| 0.385889 | 1.072916 | 0.389073 | 1 | 1 | 5580 tags=44%, list=24%, signal=58%  |
| 0.317777 | 1.072821 | 0.326087 | 1 | 1 | 5933 tags=40%, list=25%, signal=54%  |
| 0.427037 | 1.072281 | 0.368507 | 1 | 1 | 7323 tags=58%, list=31%, signal=84%  |
| 0.390048 | 1.071995 | 0.344291 | 1 | 1 | 5483 tags=53%, list=23%, signal=70%  |
| 0.365921 | 1.071961 | 0.340807 | 1 | 1 | 1681 tags=29%, list=7%, signal=31%   |
| 0.484232 | 1.071842 | 0.436191 | 1 | 1 | 4926 tags=58%, list=21%, signal=73%  |
| 0.408945 | 1.070927 | 0.391304 | 1 | 1 | 5723 tags=51%, list=24%, signal=67%  |
| 0.462144 | 1.070851 | 0.412758 | 1 | 1 | 1071 tags=29%, list=5%, signal=31%   |
| 0.417838 | 1.070701 | 0.373188 | 1 | 1 | 6866 tags=53%, list=29%, signal=75%  |
| 0.454191 | 1.070613 | 0.378151 | 1 | 1 | 5245 tags=53%, list=22%, signal=68%  |
| 0.427336 | 1.069783 | 0.434856 | 1 | 1 | 7275 tags=63%, list=31%, signal=91%  |
| 0.512295 | 1.069638 | 0.431127 | 1 | 1 | 5880 tags=56%, list=25%, signal=74%  |
| 0.368144 | 1.069268 | 0.426386 | 1 | 1 | 4560 tags=37%, list=19%, signal=46%  |
| 0.453674 | 1.069165 | 0.394393 | 1 | 1 | 5956 tags=52%, list=25%, signal=70%  |
| 0.476588 | 1.069101 | 0.459459 | 1 | 1 | 7858 tags=71%, list=34%, signal=107% |
| 0.489921 | 1.068841 | 0.424581 | 1 | 1 | 7147 tags=69%, list=31%, signal=99%  |
| 0.418725 | 1.067864 | 0.398998 | 1 | 1 | 6866 tags=61%, list=29%, signal=86%  |
| 0.350164 | 1.067016 | 0.315024 | 1 | 1 | 2381 tags=26%, list=10%, signal=29%  |
| 0.435686 | 1.066976 | 0.46223  | 1 | 1 | 5152 tags=40%, list=22%, signal=51%  |
| 0.33872  | 1.06697  | 0.343907 | 1 | 1 | 3254 tags=27%, list=14%, signal=32%  |
| 0.297422 | 1.066835 | 0.330159 | 1 | 1 | 2966 tags=30%, list=13%, signal=34%  |
| 0.31117  | 1.066724 | 0.33042  | 1 | 1 | 3759 tags=31%, list=16%, signal=37%  |
| 0.300568 | 1.066622 | 0.345178 | 1 | 1 | 5796 tags=33%, list=25%, signal=44%  |
| 0.2878   | 1.066257 | 0.333333 | 1 | 1 | 3610 tags=27%, list=15%, signal=32%  |
| 0.379252 | 1.066189 | 0.397554 | 1 | 1 | 5714 tags=52%, list=24%, signal=69%  |
| 0.547556 | 1.066033 | 0.439771 | 1 | 1 | 8050 tags=71%, list=34%, signal=108% |
| 0.330299 | 1.065298 | 0.402337 | 1 | 1 | 2597 tags=26%, list=11%, signal=29%  |
| 0.367996 | 1.065146 | 0.424908 | 1 | 1 | 4351 tags=40%, list=19%, signal=49%  |
| 0.414914 | 1.064305 | 0.364452 | 1 | 1 | 4273 tags=50%, list=18%, signal=61%  |

|          |          |          |   |   |                                      |
|----------|----------|----------|---|---|--------------------------------------|
| 0.366998 | 1.064125 | 0.335799 | 1 | 1 | 6234 tags=52%, list=27%, signal=70%  |
| 0.356546 | 1.063901 | 0.35625  | 1 | 1 | 3688 tags=35%, list=16%, signal=42%  |
| 0.365901 | 1.063606 | 0.440433 | 1 | 1 | 5208 tags=36%, list=22%, signal=46%  |
| 0.328307 | 1.062993 | 0.321377 | 1 | 1 | 2932 tags=29%, list=13%, signal=34%  |
| 0.394817 | 1.062756 | 0.37702  | 1 | 1 | 1116 tags=32%, list=5%, signal=33%   |
| 0.359716 | 1.062748 | 0.386023 | 1 | 1 | 3730 tags=42%, list=16%, signal=50%  |
| 0.396144 | 1.062629 | 0.410546 | 1 | 1 | 5324 tags=46%, list=23%, signal=59%  |
| 0.409195 | 1.061583 | 0.426497 | 1 | 1 | 5651 tags=51%, list=24%, signal=67%  |
| 0.347626 | 1.061425 | 0.396197 | 1 | 1 | 2738 tags=31%, list=12%, signal=35%  |
| 0.351086 | 1.06036  | 0.360555 | 1 | 1 | 2902 tags=26%, list=12%, signal=30%  |
| 0.363768 | 1.060015 | 0.437736 | 1 | 1 | 5835 tags=44%, list=25%, signal=58%  |
| 0.297678 | 1.059731 | 0.331316 | 1 | 1 | 3105 tags=29%, list=13%, signal=33%  |
| 0.455076 | 1.059081 | 0.401887 | 1 | 1 | 4694 tags=55%, list=20%, signal=69%  |
| 0.309899 | 1.058806 | 0.390119 | 1 | 1 | 4853 tags=35%, list=21%, signal=44%  |
| 0.454962 | 1.058738 | 0.434783 | 1 | 1 | 5788 tags=59%, list=25%, signal=79%  |
| 0.40543  | 1.058567 | 0.441392 | 1 | 1 | 5719 tags=39%, list=24%, signal=51%  |
| 0.460751 | 1.05852  | 0.456044 | 1 | 1 | 5930 tags=53%, list=25%, signal=70%  |
| 0.383363 | 1.057146 | 0.399648 | 1 | 1 | 2710 tags=33%, list=12%, signal=37%  |
| 0.319735 | 1.056809 | 0.35     | 1 | 1 | 5491 tags=42%, list=23%, signal=55%  |
| 0.350114 | 1.056719 | 0.362903 | 1 | 1 | 2813 tags=27%, list=12%, signal=31%  |
| 0.407349 | 1.056347 | 0.363782 | 1 | 1 | 6655 tags=62%, list=28%, signal=87%  |
| 0.311121 | 1.054603 | 0.341632 | 1 | 1 | 5020 tags=42%, list=21%, signal=53%  |
| 0.400433 | 1.053838 | 0.419411 | 1 | 1 | 6306 tags=44%, list=27%, signal=60%  |
| 0.484533 | 1.053752 | 0.423759 | 1 | 1 | 5880 tags=48%, list=25%, signal=64%  |
| 0.387149 | 1.053648 | 0.4304   | 1 | 1 | 2099 tags=31%, list=9%, signal=34%   |
| 0.562084 | 1.052491 | 0.448405 | 1 | 1 | 7019 tags=65%, list=30%, signal=92%  |
| 0.306583 | 1.051654 | 0.411003 | 1 | 1 | 5283 tags=40%, list=23%, signal=51%  |
| 0.292704 | 1.050986 | 0.346045 | 1 | 1 | 4514 tags=35%, list=19%, signal=43%  |
| 0.321146 | 1.050304 | 0.39469  | 1 | 1 | 2506 tags=26%, list=11%, signal=30%  |
| 0.319029 | 1.049977 | 0.368976 | 1 | 1 | 4704 tags=43%, list=20%, signal=54%  |
| 0.294567 | 1.048486 | 0.376033 | 1 | 1 | 5857 tags=52%, list=25%, signal=70%  |
| 0.262153 | 1.048369 | 0.332842 | 1 | 1 | 5540 tags=35%, list=24%, signal=45%  |
| 0.322525 | 1.0479   | 0.383178 | 1 | 1 | 4170 tags=25%, list=18%, signal=30%  |
| 0.334625 | 1.047173 | 0.349711 | 1 | 1 | 3403 tags=32%, list=15%, signal=38%  |
| 0.338759 | 1.046798 | 0.392157 | 1 | 1 | 6897 tags=54%, list=29%, signal=77%  |
| 0.372771 | 1.046512 | 0.389351 | 1 | 1 | 9034 tags=63%, list=39%, signal=102% |
| 0.409174 | 1.046064 | 0.434109 | 1 | 1 | 7358 tags=56%, list=31%, signal=82%  |
| 0.373509 | 1.046043 | 0.383607 | 1 | 1 | 4457 tags=41%, list=19%, signal=51%  |
| 0.380142 | 1.045267 | 0.468966 | 1 | 1 | 5682 tags=46%, list=24%, signal=60%  |
| 0.358727 | 1.045057 | 0.421409 | 1 | 1 | 4627 tags=39%, list=20%, signal=49%  |
| 0.403783 | 1.044729 | 0.453782 | 1 | 1 | 6114 tags=59%, list=26%, signal=80%  |
| 0.258351 | 1.043858 | 0.326877 | 1 | 1 | 3777 tags=28%, list=16%, signal=33%  |
| 0.400287 | 1.040568 | 0.389134 | 1 | 1 | 2600 tags=40%, list=11%, signal=45%  |
| 0.479199 | 1.040459 | 0.434866 | 1 | 1 | 7046 tags=57%, list=30%, signal=81%  |
| 0.473476 | 1.040097 | 0.489796 | 1 | 1 | 4926 tags=57%, list=21%, signal=72%  |
| 0.266991 | 1.039382 | 0.335756 | 1 | 1 | 4775 tags=35%, list=20%, signal=43%  |
| 0.295086 | 1.038991 | 0.389231 | 1 | 1 | 4278 tags=28%, list=18%, signal=34%  |
| 0.300912 | 1.038368 | 0.393189 | 1 | 1 | 3478 tags=36%, list=15%, signal=42%  |
| 0.33153  | 1.037278 | 0.432039 | 1 | 1 | 3352 tags=37%, list=14%, signal=43%  |
| 0.346631 | 1.036639 | 0.438061 | 1 | 1 | 5378 tags=40%, list=23%, signal=51%  |

|          |          |          |   |   |                                      |
|----------|----------|----------|---|---|--------------------------------------|
| 0.461952 | 1.03653  | 0.433645 | 1 | 1 | 5656 tags=56%, list=24%, signal=73%  |
| 0.377582 | 1.036344 | 0.425159 | 1 | 1 | 6316 tags=55%, list=27%, signal=76%  |
| 0.314839 | 1.036204 | 0.415842 | 1 | 1 | 2748 tags=30%, list=12%, signal=34%  |
| 0.290117 | 1.035672 | 0.390625 | 1 | 1 | 3035 tags=30%, list=13%, signal=34%  |
| 0.374484 | 1.035412 | 0.413194 | 1 | 1 | 917 tags=27%, list=4%, signal=28%    |
| 0.373173 | 1.035365 | 0.451043 | 1 | 1 | 1564 tags=29%, list=7%, signal=31%   |
| 0.347496 | 1.035138 | 0.463972 | 1 | 1 | 5329 tags=43%, list=23%, signal=56%  |
| 0.293907 | 1.034781 | 0.38307  | 1 | 1 | 5459 tags=40%, list=23%, signal=52%  |
| 0.469013 | 1.034635 | 0.435233 | 1 | 1 | 5673 tags=48%, list=24%, signal=63%  |
| 0.305085 | 1.034103 | 0.405899 | 1 | 1 | 4187 tags=31%, list=18%, signal=37%  |
| 0.452572 | 1.033946 | 0.401254 | 1 | 1 | 4068 tags=56%, list=17%, signal=67%  |
| 0.390697 | 1.033846 | 0.421442 | 1 | 1 | 3944 tags=35%, list=17%, signal=42%  |
| 0.411459 | 1.033448 | 0.463878 | 1 | 1 | 6010 tags=50%, list=26%, signal=67%  |
| 0.334004 | 1.033427 | 0.431062 | 1 | 1 | 3051 tags=26%, list=13%, signal=30%  |
| 0.331934 | 1.033025 | 0.399713 | 1 | 1 | 5522 tags=40%, list=24%, signal=52%  |
| 0.345712 | 1.032571 | 0.380719 | 1 | 1 | 4737 tags=37%, list=20%, signal=46%  |
| 0.328264 | 1.032351 | 0.385037 | 1 | 1 | 5790 tags=37%, list=25%, signal=49%  |
| 0.344261 | 1.031286 | 0.42978  | 1 | 1 | 5555 tags=40%, list=24%, signal=53%  |
| 0.334231 | 1.030393 | 0.447735 | 1 | 1 | 5445 tags=39%, list=23%, signal=51%  |
| 0.365194 | 1.030299 | 0.440536 | 1 | 1 | 4154 tags=38%, list=18%, signal=46%  |
| 0.371852 | 1.029949 | 0.40177  | 1 | 1 | 6291 tags=47%, list=27%, signal=64%  |
| 0.354349 | 1.029754 | 0.410959 | 1 | 1 | 4332 tags=32%, list=18%, signal=39%  |
| 0.371867 | 1.029706 | 0.398637 | 1 | 1 | 1844 tags=29%, list=8%, signal=31%   |
| 0.379126 | 1.029396 | 0.407609 | 1 | 1 | 4640 tags=41%, list=20%, signal=50%  |
| 0.257842 | 1.029205 | 0.405121 | 1 | 1 | 5540 tags=32%, list=24%, signal=41%  |
| 0.305872 | 1.028884 | 0.372488 | 1 | 1 | 6370 tags=44%, list=27%, signal=60%  |
| 0.351071 | 1.028381 | 0.427711 | 1 | 1 | 6304 tags=46%, list=27%, signal=63%  |
| 0.441118 | 1.027807 | 0.453532 | 1 | 1 | 2676 tags=36%, list=11%, signal=41%  |
| 0.297228 | 1.027798 | 0.483051 | 1 | 1 | 5859 tags=44%, list=25%, signal=58%  |
| 0.360449 | 1.027364 | 0.435154 | 1 | 1 | 4511 tags=39%, list=19%, signal=49%  |
| 0.3004   | 1.027038 | 0.427184 | 1 | 1 | 2612 tags=25%, list=11%, signal=28%  |
| 0.428361 | 1.026784 | 0.432971 | 1 | 1 | 6730 tags=64%, list=29%, signal=89%  |
| 0.30212  | 1.026276 | 0.406926 | 1 | 1 | 3366 tags=25%, list=14%, signal=29%  |
| 0.274486 | 1.026158 | 0.4304   | 1 | 1 | 3949 tags=29%, list=17%, signal=35%  |
| 0.35955  | 1.025709 | 0.419753 | 1 | 1 | 2816 tags=31%, list=12%, signal=35%  |
| 0.290205 | 1.025689 | 0.462633 | 1 | 1 | 5729 tags=37%, list=24%, signal=48%  |
| 0.293819 | 1.025132 | 0.403175 | 1 | 1 | 5882 tags=42%, list=25%, signal=56%  |
| 0.460879 | 1.02483  | 0.455535 | 1 | 1 | 7437 tags=67%, list=32%, signal=97%  |
| 0.401412 | 1.02469  | 0.485086 | 1 | 1 | 6214 tags=50%, list=27%, signal=68%  |
| 0.311307 | 1.024625 | 0.457143 | 1 | 1 | 1255 tags=17%, list=5%, signal=18%   |
| 0.36236  | 1.02436  | 0.437398 | 1 | 1 | 1829 tags=21%, list=8%, signal=23%   |
| 0.260092 | 1.023495 | 0.430894 | 1 | 1 | 4193 tags=30%, list=18%, signal=36%  |
| 0.365151 | 1.023142 | 0.423895 | 1 | 1 | 3072 tags=39%, list=13%, signal=45%  |
| 0.28716  | 1.02301  | 0.404946 | 1 | 1 | 4633 tags=35%, list=20%, signal=43%  |
| 0.291653 | 1.022475 | 0.443038 | 1 | 1 | 4628 tags=35%, list=20%, signal=43%  |
| 0.297487 | 1.022186 | 0.384071 | 1 | 1 | 4960 tags=36%, list=21%, signal=45%  |
| 0.516057 | 1.021433 | 0.474088 | 1 | 1 | 7858 tags=80%, list=34%, signal=120% |
| 0.297814 | 1.0212   | 0.471025 | 1 | 1 | 4773 tags=36%, list=20%, signal=45%  |
| 0.263467 | 1.020896 | 0.470499 | 1 | 1 | 3276 tags=25%, list=14%, signal=29%  |
| 0.421085 | 1.020589 | 0.446203 | 1 | 1 | 5644 tags=53%, list=24%, signal=70%  |



|          |          |          |          |   |                                      |
|----------|----------|----------|----------|---|--------------------------------------|
| 0.353291 | 1.020499 | 0.410882 | 1        | 1 | 5952 tags=44%, list=25%, signal=58%  |
| 0.545205 | 1.020354 | 0.472119 | 1        | 1 | 8050 tags=63%, list=34%, signal=96%  |
| 0.387008 | 1.020338 | 0.466443 | 1        | 1 | 5895 tags=49%, list=25%, signal=65%  |
| 0.351869 | 1.019212 | 0.42     | 1        | 1 | 3918 tags=35%, list=17%, signal=42%  |
| 0.336724 | 1.018753 | 0.418519 | 1        | 1 | 4456 tags=37%, list=19%, signal=46%  |
| 0.260725 | 1.018685 | 0.402985 | 1        | 1 | 4217 tags=25%, list=18%, signal=31%  |
| 0.276546 | 1.018591 | 0.372828 | 1        | 1 | 4048 tags=28%, list=17%, signal=34%  |
| 0.33749  | 1.018335 | 0.433172 | 1        | 1 | 5044 tags=50%, list=22%, signal=64%  |
| 0.34139  | 1.018263 | 0.426104 | 1        | 1 | 4332 tags=32%, list=18%, signal=39%  |
| 0.428228 | 1.017721 | 0.464143 | 1        | 1 | 5312 tags=56%, list=23%, signal=73%  |
| 0.379979 | 1.01729  | 0.426288 | 1        | 1 | 1696 tags=24%, list=7%, signal=26%   |
| 0.309846 | 1.017258 | 0.427419 | 1        | 1 | 6082 tags=51%, list=26%, signal=69%  |
| 0.390172 | 1.01723  | 0.47193  | 1        | 1 | 4746 tags=30%, list=20%, signal=38%  |
| 0.315249 | 1.016961 | 0.40137  | 1        | 1 | 4978 tags=40%, list=21%, signal=51%  |
| 0.302832 | 1.016885 | 0.434535 | 1        | 1 | 3822 tags=27%, list=16%, signal=32%  |
| 0.483181 | 1.016289 | 0.510989 | 1        | 1 | 5551 tags=52%, list=24%, signal=68%  |
| 0.271218 | 1.015665 | 0.383046 | 1        | 1 | 4659 tags=34%, list=20%, signal=42%  |
| 0.419775 | 1.014104 | 0.436149 | 1        | 1 | 3631 tags=35%, list=16%, signal=42%  |
| 0.289665 | 1.014046 | 0.427019 | 1        | 1 | 6031 tags=46%, list=26%, signal=62%  |
| 0.248814 | 1.013881 | 0.459016 | 1        | 1 | 4511 tags=33%, list=19%, signal=40%  |
| 0.504348 | 1.013768 | 0.500956 | 1        | 1 | 7858 tags=73%, list=34%, signal=109% |
| 0.415891 | 1.01365  | 0.455988 | 1        | 1 | 5671 tags=42%, list=24%, signal=56%  |
| 0.454859 | 1.013179 | 0.480519 | 1        | 1 | 7892 tags=65%, list=34%, signal=97%  |
| 0.322356 | 1.013174 | 0.414802 | 1        | 1 | 2249 tags=26%, list=10%, signal=29%  |
| 0.286644 | 1.012658 | 0.455099 | 1        | 1 | 5901 tags=38%, list=25%, signal=50%  |
| 0.290555 | 1.012492 | 0.438597 | 1        | 1 | 4509 tags=28%, list=19%, signal=35%  |
| 0.318364 | 1.012077 | 0.42576  | 1        | 1 | 4367 tags=24%, list=19%, signal=29%  |
| 0.42598  | 1.012049 | 0.490725 | 1        | 1 | 6022 tags=50%, list=26%, signal=67%  |
| 0.382673 | 1.011025 | 0.461268 | 1        | 1 | 5044 tags=45%, list=22%, signal=58%  |
| 0.279211 | 1.010827 | 0.441997 | 1        | 1 | 4271 tags=30%, list=18%, signal=37%  |
| 0.425477 | 1.010619 | 0.463221 | 1        | 1 | 7499 tags=53%, list=32%, signal=78%  |
| 0.246813 | 1.01022  | 0.45706  | 1        | 1 | 4727 tags=32%, list=20%, signal=39%  |
| 0.313243 | 1.010185 | 0.447552 | 1        | 1 | 6866 tags=48%, list=29%, signal=68%  |
| 0.284274 | 1.010035 | 0.442623 | 1        | 1 | 5925 tags=42%, list=25%, signal=55%  |
| 0.331452 | 1.009639 | 0.469218 | 1        | 1 | 5809 tags=36%, list=25%, signal=48%  |
| 0.39562  | 1.009512 | 0.474441 | 1        | 1 | 3500 tags=27%, list=15%, signal=32%  |
| 0.409597 | 1.009334 | 0.458633 | 1        | 1 | 7970 tags=62%, list=34%, signal=94%  |
| 0.409916 | 1.009165 | 0.454717 | 1        | 1 | 7147 tags=59%, list=31%, signal=84%  |
| 0.302705 | 1.009093 | 0.422059 | 1        | 1 | 626 tags=15%, list=3%, signal=15%    |
| 0.403084 | 1.008493 | 0.451078 | 1        | 1 | 2948 tags=33%, list=13%, signal=38%  |
| 0.496697 | 1.008327 | 0.496255 | 1        | 1 | 5353 tags=48%, list=23%, signal=61%  |
| 0.305701 | 1.00808  | 0.480865 | 1        | 1 | 2172 tags=22%, list=9%, signal=24%   |
| 0.37282  | 1.00777  | 0.469194 | 0.999578 | 1 | 2700 tags=35%, list=12%, signal=40%  |
| 0.352695 | 1.007768 | 0.476692 | 0.998035 | 1 | 5831 tags=48%, list=25%, signal=64%  |
| 0.350349 | 1.007131 | 0.435556 | 0.998703 | 1 | 4520 tags=43%, list=19%, signal=53%  |
| 0.300129 | 1.007062 | 0.424354 | 0.997362 | 1 | 3993 tags=30%, list=17%, signal=35%  |
| 0.347087 | 1.006295 | 0.457143 | 0.998368 | 1 | 2761 tags=21%, list=12%, signal=23%  |
| 0.299289 | 1.005945 | 0.460614 | 0.998009 | 1 | 2409 tags=22%, list=10%, signal=25%  |
| 0.350023 | 1.004652 | 0.483553 | 1        | 1 | 3633 tags=27%, list=16%, signal=32%  |
| 0.33705  | 1.003903 | 0.46568  | 1        | 1 | 6218 tags=46%, list=27%, signal=62%  |

|          |          |          |          |   |      |                                 |
|----------|----------|----------|----------|---|------|---------------------------------|
| 0.369065 | 1.003796 | 0.440758 | 1        | 1 | 3567 | tags=38%, list=15%, signal=45%  |
| 0.407223 | 1.003752 | 0.47099  | 0.998957 | 1 | 5530 | tags=48%, list=24%, signal=63%  |
| 0.380549 | 1.002834 | 0.433962 | 1        | 1 | 5937 | tags=48%, list=25%, signal=64%  |
| 0.34721  | 1.00235  | 0.471204 | 1        | 1 | 1094 | tags=13%, list=5%, signal=13%   |
| 0.283521 | 1.002178 | 0.482143 | 0.999482 | 1 | 4144 | tags=28%, list=18%, signal=34%  |
| 0.462098 | 1.002109 | 0.489362 | 0.998152 | 1 | 8098 | tags=69%, list=35%, signal=106% |
| 0.274115 | 1.00189  | 0.44152  | 0.997288 | 1 | 5671 | tags=39%, list=24%, signal=52%  |
| 0.354146 | 1.001657 | 0.488688 | 0.996483 | 1 | 4770 | tags=38%, list=20%, signal=47%  |
| 0.281138 | 1.001571 | 0.521886 | 0.99527  | 1 | 4643 | tags=31%, list=20%, signal=38%  |
| 0.270037 | 1.001411 | 0.476268 | 0.994278 | 1 | 3495 | tags=28%, list=15%, signal=32%  |
| 0.402221 | 0.999678 | 0.530097 | 0.998037 | 1 | 6282 | tags=35%, list=27%, signal=47%  |
| 0.356738 | 0.999646 | 0.454254 | 0.996626 | 1 | 4081 | tags=35%, list=17%, signal=42%  |
| 0.30394  | 0.998983 | 0.427083 | 0.997321 | 1 | 5882 | tags=42%, list=25%, signal=56%  |
| 0.452201 | 0.998723 | 0.518304 | 0.996624 | 1 | 5962 | tags=56%, list=25%, signal=74%  |
| 0.35964  | 0.99824  | 0.445098 | 0.996556 | 1 | 4388 | tags=33%, list=19%, signal=41%  |
| 0.281782 | 0.997939 | 0.448175 | 0.995957 | 1 | 7324 | tags=48%, list=31%, signal=69%  |
| 0.343196 | 0.997811 | 0.440177 | 0.99484  | 1 | 2996 | tags=32%, list=13%, signal=37%  |
| 0.440107 | 0.997584 | 0.511236 | 0.994104 | 1 | 4802 | tags=54%, list=21%, signal=68%  |
| 0.319536 | 0.997049 | 0.45283  | 0.99423  | 1 | 2913 | tags=32%, list=12%, signal=36%  |
| 0.338124 | 0.996735 | 0.498141 | 0.993767 | 1 | 1037 | tags=21%, list=4%, signal=22%   |
| 0.325324 | 0.996732 | 0.443995 | 0.992305 | 1 | 5906 | tags=40%, list=25%, signal=54%  |
| 0.423454 | 0.996404 | 0.507576 | 0.992042 | 1 | 7335 | tags=59%, list=31%, signal=86%  |
| 0.294043 | 0.996344 | 0.492832 | 0.990702 | 1 | 5865 | tags=34%, list=25%, signal=45%  |
| 0.364289 | 0.994849 | 0.473384 | 0.993915 | 1 | 5324 | tags=38%, list=23%, signal=48%  |
| 0.345717 | 0.994384 | 0.484375 | 0.993929 | 1 | 5803 | tags=38%, list=25%, signal=51%  |
| 0.294242 | 0.993424 | 0.501385 | 0.995433 | 1 | 3488 | tags=29%, list=15%, signal=34%  |
| 0.283368 | 0.99331  | 0.444785 | 0.994306 | 1 | 5474 | tags=41%, list=23%, signal=52%  |
| 0.378516 | 0.99323  | 0.430451 | 0.993059 | 1 | 8065 | tags=61%, list=34%, signal=92%  |
| 0.251384 | 0.993112 | 0.473227 | 0.991981 | 1 | 3579 | tags=24%, list=15%, signal=28%  |
| 0.433236 | 0.993066 | 0.472546 | 0.990651 | 1 | 4358 | tags=50%, list=19%, signal=61%  |
| 0.476286 | 0.993035 | 0.483696 | 0.9893   | 1 | 3944 | tags=43%, list=17%, signal=51%  |
| 0.409893 | 0.992981 | 0.452007 | 0.987989 | 1 | 5558 | tags=51%, list=24%, signal=67%  |
| 0.307555 | 0.992977 | 0.481422 | 0.98655  | 1 | 6023 | tags=41%, list=26%, signal=55%  |
| 0.385611 | 0.992912 | 0.423645 | 0.985285 | 1 | 5283 | tags=45%, list=23%, signal=58%  |
| 0.254892 | 0.992749 | 0.415435 | 0.984353 | 1 | 2920 | tags=19%, list=12%, signal=22%  |
| 0.270547 | 0.992426 | 0.474662 | 0.983859 | 1 | 4556 | tags=27%, list=19%, signal=33%  |
| 0.300553 | 0.991592 | 0.510938 | 0.984998 | 1 | 3276 | tags=26%, list=14%, signal=30%  |
| 0.31849  | 0.991583 | 0.468582 | 0.9836   | 1 | 3978 | tags=33%, list=17%, signal=39%  |
| 0.298272 | 0.990529 | 0.496644 | 0.985614 | 1 | 5533 | tags=36%, list=24%, signal=47%  |
| 0.290931 | 0.989956 | 0.50487  | 0.98603  | 1 | 5882 | tags=38%, list=25%, signal=50%  |
| 0.413489 | 0.989741 | 0.50099  | 0.98524  | 1 | 6010 | tags=50%, list=26%, signal=66%  |
| 0.344332 | 0.98932  | 0.44702  | 0.984992 | 1 | 4378 | tags=32%, list=19%, signal=40%  |
| 0.392355 | 0.988988 | 0.493827 | 0.984712 | 1 | 6392 | tags=57%, list=27%, signal=78%  |
| 0.343103 | 0.988856 | 0.490909 | 0.983661 | 1 | 2099 | tags=24%, list=9%, signal=26%   |
| 0.330306 | 0.988411 | 0.433099 | 0.983591 | 1 | 4008 | tags=29%, list=17%, signal=34%  |
| 0.334863 | 0.988301 | 0.481766 | 0.982521 | 1 | 5590 | tags=39%, list=24%, signal=51%  |
| 0.262176 | 0.987991 | 0.478708 | 0.982089 | 1 | 2785 | tags=23%, list=12%, signal=26%  |
| 0.379456 | 0.98795  | 0.49913  | 0.980785 | 1 | 7439 | tags=43%, list=32%, signal=63%  |
| 0.530674 | 0.987872 | 0.61062  | 0.97958  | 1 | 6699 | tags=47%, list=29%, signal=66%  |
| 0.320906 | 0.987661 | 0.462366 | 0.978795 | 1 | 3721 | tags=37%, list=16%, signal=44%  |

|          |          |          |          |   |                                      |
|----------|----------|----------|----------|---|--------------------------------------|
| 0.45504  | 0.987016 | 0.518382 | 0.979388 | 1 | 5564 tags=53%, list=24%, signal=69%  |
| 0.244991 | 0.986565 | 0.490446 | 0.979418 | 1 | 3225 tags=22%, list=14%, signal=25%  |
| 0.261512 | 0.986444 | 0.522124 | 0.978392 | 1 | 4863 tags=30%, list=21%, signal=37%  |
| 0.355023 | 0.986358 | 0.512368 | 0.977366 | 1 | 3945 tags=44%, list=17%, signal=53%  |
| 0.308239 | 0.985929 | 0.482549 | 0.97731  | 1 | 3366 tags=31%, list=14%, signal=36%  |
| 0.254851 | 0.985786 | 0.450464 | 0.976352 | 1 | 5925 tags=37%, list=25%, signal=49%  |
| 0.262462 | 0.985513 | 0.537748 | 0.975835 | 1 | 4127 tags=30%, list=18%, signal=36%  |
| 0.275437 | 0.985216 | 0.424497 | 0.975278 | 1 | 4694 tags=32%, list=20%, signal=40%  |
| 0.347684 | 0.985196 | 0.440959 | 0.973946 | 1 | 5701 tags=41%, list=24%, signal=53%  |
| 0.313958 | 0.985185 | 0.447109 | 0.972604 | 1 | 5595 tags=42%, list=24%, signal=55%  |
| 0.416393 | 0.98506  | 0.438938 | 0.971634 | 1 | 3638 tags=39%, list=16%, signal=46%  |
| 0.293433 | 0.984674 | 0.533646 | 0.971327 | 1 | 2506 tags=25%, list=11%, signal=28%  |
| 0.35674  | 0.984132 | 0.55719  | 0.971486 | 1 | 5762 tags=50%, list=25%, signal=66%  |
| 0.363073 | 0.983295 | 0.461661 | 0.972589 | 1 | 3288 tags=29%, list=14%, signal=34%  |
| 0.315795 | 0.983059 | 0.445765 | 0.971919 | 1 | 1898 tags=19%, list=8%, signal=21%   |
| 0.299695 | 0.98304  | 0.467456 | 0.970604 | 1 | 4892 tags=39%, list=21%, signal=49%  |
| 0.479937 | 0.982985 | 0.513812 | 0.969443 | 1 | 5152 tags=50%, list=22%, signal=64%  |
| 0.377299 | 0.982766 | 0.502732 | 0.968713 | 1 | 4365 tags=39%, list=19%, signal=47%  |
| 0.429575 | 0.982585 | 0.50289  | 0.967886 | 1 | 6500 tags=49%, list=28%, signal=68%  |
| 0.378156 | 0.982498 | 0.486903 | 0.966865 | 1 | 1864 tags=29%, list=8%, signal=31%   |
| 0.408531 | 0.982161 | 0.485507 | 0.966583 | 1 | 5834 tags=56%, list=25%, signal=74%  |
| 0.305153 | 0.982008 | 0.51772  | 0.965641 | 1 | 4443 tags=34%, list=19%, signal=42%  |
| 0.244768 | 0.981706 | 0.517241 | 0.965184 | 1 | 4097 tags=28%, list=17%, signal=33%  |
| 0.431606 | 0.981534 | 0.539197 | 0.964314 | 1 | 5003 tags=43%, list=21%, signal=55%  |
| 0.370514 | 0.98118  | 0.460548 | 0.963981 | 1 | 7805 tags=57%, list=33%, signal=85%  |
| 0.24767  | 0.980659 | 0.482659 | 0.964152 | 1 | 4741 tags=30%, list=20%, signal=37%  |
| 0.353673 | 0.98051  | 0.475836 | 0.963231 | 1 | 1281 tags=24%, list=5%, signal=25%   |
| 0.292676 | 0.979899 | 0.479263 | 0.963849 | 1 | 5607 tags=40%, list=24%, signal=53%  |
| 0.396237 | 0.97981  | 0.519504 | 0.962791 | 1 | 4816 tags=48%, list=21%, signal=60%  |
| 0.496835 | 0.97944  | 0.598862 | 0.96258  | 1 | 7508 tags=83%, list=32%, signal=123% |
| 0.251537 | 0.979178 | 0.551247 | 0.962084 | 1 | 3579 tags=25%, list=15%, signal=29%  |
| 0.428622 | 0.978363 | 0.522769 | 0.963353 | 1 | 5020 tags=46%, list=21%, signal=59%  |
| 0.338684 | 0.977928 | 0.504188 | 0.963405 | 1 | 5095 tags=47%, list=22%, signal=60%  |
| 0.382929 | 0.977702 | 0.511927 | 0.962672 | 1 | 5869 tags=45%, list=25%, signal=59%  |
| 0.234354 | 0.977211 | 0.530643 | 0.962778 | 1 | 4201 tags=26%, list=18%, signal=32%  |
| 0.349054 | 0.976493 | 0.499127 | 0.963376 | 1 | 3188 tags=33%, list=14%, signal=39%  |
| 0.280103 | 0.976179 | 0.539342 | 0.963006 | 1 | 2960 tags=25%, list=13%, signal=29%  |
| 0.30932  | 0.975944 | 0.445351 | 0.96241  | 1 | 4896 tags=35%, list=21%, signal=44%  |
| 0.338927 | 0.975801 | 0.468852 | 0.961548 | 1 | 5094 tags=39%, list=22%, signal=50%  |
| 0.51108  | 0.975615 | 0.573077 | 0.960844 | 1 | 7358 tags=67%, list=31%, signal=97%  |
| 0.270623 | 0.97491  | 0.428816 | 0.961651 | 1 | 5573 tags=37%, list=24%, signal=48%  |
| 0.360851 | 0.97485  | 0.508943 | 0.96054  | 1 | 2597 tags=28%, list=11%, signal=31%  |
| 0.365136 | 0.97476  | 0.488889 | 0.959548 | 1 | 5020 tags=40%, list=21%, signal=51%  |
| 0.424427 | 0.974414 | 0.510358 | 0.959179 | 1 | 5607 tags=56%, list=24%, signal=74%  |
| 0.388928 | 0.973929 | 0.489399 | 0.95931  | 1 | 5532 tags=46%, list=24%, signal=60%  |
| 0.353516 | 0.973928 | 0.471795 | 0.958031 | 1 | 4726 tags=39%, list=20%, signal=49%  |
| 0.336096 | 0.971847 | 0.503247 | 0.962664 | 1 | 4217 tags=40%, list=18%, signal=48%  |
| 0.289586 | 0.971626 | 0.4375   | 0.962023 | 1 | 3842 tags=30%, list=16%, signal=36%  |
| 0.366184 | 0.971346 | 0.522642 | 0.961537 | 1 | 6280 tags=47%, list=27%, signal=64%  |
| 0.35742  | 0.971005 | 0.507132 | 0.961292 | 1 | 3129 tags=30%, list=13%, signal=34%  |

|          |          |          |          |   |                                       |
|----------|----------|----------|----------|---|---------------------------------------|
| 0.352896 | 0.970958 | 0.500907 | 0.960161 | 1 | 3162 tags=30%, list=14%, signal=35%   |
| 0.3994   | 0.970901 | 0.489362 | 0.95912  | 1 | 6868 tags=72%, list=29%, signal=102%  |
| 0.303195 | 0.970273 | 0.540115 | 0.959538 | 1 | 4004 tags=32%, list=17%, signal=38%   |
| 0.277458 | 0.970258 | 0.533813 | 0.958304 | 1 | 5993 tags=43%, list=26%, signal=57%   |
| 0.271082 | 0.969748 | 0.530142 | 0.958564 | 1 | 2676 tags=19%, list=11%, signal=21%   |
| 0.318287 | 0.968973 | 0.488487 | 0.959521 | 1 | 3469 tags=33%, list=15%, signal=38%   |
| 0.360927 | 0.967834 | 0.503852 | 0.961504 | 1 | 5370 tags=35%, list=23%, signal=45%   |
| 0.386244 | 0.967808 | 0.515548 | 0.960341 | 1 | 4926 tags=50%, list=21%, signal=63%   |
| 0.510428 | 0.967663 | 0.567669 | 0.959497 | 1 | 10207 tags=84%, list=44%, signal=149% |
| 0.285211 | 0.967622 | 0.51436  | 0.958378 | 1 | 5430 tags=38%, list=23%, signal=49%   |
| 0.330112 | 0.967205 | 0.524476 | 0.95827  | 1 | 4766 tags=38%, list=20%, signal=48%   |
| 0.329727 | 0.966787 | 0.553655 | 0.958088 | 1 | 5565 tags=47%, list=24%, signal=62%   |
| 0.336313 | 0.966718 | 0.458763 | 0.957064 | 1 | 3777 tags=26%, list=16%, signal=32%   |
| 0.421915 | 0.966632 | 0.5      | 0.956086 | 1 | 6213 tags=54%, list=27%, signal=74%   |
| 0.327376 | 0.966476 | 0.499044 | 0.955295 | 1 | 4334 tags=36%, list=19%, signal=44%   |
| 0.2656   | 0.966468 | 0.609023 | 0.954058 | 1 | 3503 tags=25%, list=15%, signal=29%   |
| 0.309779 | 0.966373 | 0.533784 | 0.953075 | 1 | 4638 tags=35%, list=20%, signal=43%   |
| 0.370612 | 0.965859 | 0.495033 | 0.953168 | 1 | 6368 tags=42%, list=27%, signal=58%   |
| 0.297999 | 0.965628 | 0.52     | 0.952565 | 1 | 4038 tags=37%, list=17%, signal=45%   |
| 0.344338 | 0.964945 | 0.508604 | 0.953235 | 1 | 2502 tags=33%, list=11%, signal=37%   |
| 0.304761 | 0.964803 | 0.493716 | 0.952435 | 1 | 3737 tags=30%, list=16%, signal=36%   |
| 0.331654 | 0.964599 | 0.495327 | 0.951833 | 1 | 3788 tags=37%, list=16%, signal=44%   |
| 0.353399 | 0.96436  | 0.522073 | 0.951264 | 1 | 5020 tags=34%, list=21%, signal=44%   |
| 0.285495 | 0.964061 | 0.535771 | 0.950889 | 1 | 5537 tags=36%, list=24%, signal=48%   |
| 0.380462 | 0.962942 | 0.49639  | 0.953003 | 1 | 3667 tags=34%, list=16%, signal=41%   |
| 0.273808 | 0.96227  | 0.509589 | 0.953695 | 1 | 3808 tags=32%, list=16%, signal=38%   |
| 0.238291 | 0.961172 | 0.518836 | 0.955454 | 1 | 4308 tags=24%, list=18%, signal=29%   |
| 0.430028 | 0.961045 | 0.530075 | 0.954544 | 1 | 5962 tags=54%, list=25%, signal=71%   |
| 0.383298 | 0.960337 | 0.474954 | 0.95525  | 1 | 7718 tags=58%, list=33%, signal=86%   |
| 0.352311 | 0.959898 | 0.524074 | 0.955255 | 1 | 2371 tags=30%, list=10%, signal=34%   |
| 0.265931 | 0.95967  | 0.505376 | 0.95468  | 1 | 4441 tags=32%, list=19%, signal=39%   |
| 0.378325 | 0.958629 | 0.565436 | 0.956178 | 1 | 435 tags=14%, list=2%, signal=15%     |
| 0.430905 | 0.958531 | 0.559265 | 0.955219 | 1 | 6188 tags=43%, list=26%, signal=58%   |
| 0.322313 | 0.958487 | 0.462712 | 0.954107 | 1 | 3026 tags=29%, list=13%, signal=33%   |
| 0.400444 | 0.958426 | 0.552511 | 0.953059 | 1 | 3342 tags=35%, list=14%, signal=41%   |
| 0.296841 | 0.958058 | 0.561482 | 0.952873 | 1 | 4591 tags=40%, list=20%, signal=50%   |
| 0.297807 | 0.957681 | 0.493789 | 0.952646 | 1 | 5933 tags=45%, list=25%, signal=60%   |
| 0.273081 | 0.957519 | 0.485207 | 0.95191  | 1 | 3512 tags=27%, list=15%, signal=32%   |
| 0.325856 | 0.957475 | 0.536082 | 0.95087  | 1 | 4534 tags=40%, list=19%, signal=50%   |
| 0.245295 | 0.95744  | 0.60469  | 0.949767 | 1 | 4597 tags=25%, list=20%, signal=31%   |
| 0.256501 | 0.956137 | 0.556985 | 0.952308 | 1 | 3547 tags=24%, list=15%, signal=29%   |
| 0.373749 | 0.955975 | 0.48474  | 0.951613 | 1 | 5238 tags=41%, list=22%, signal=52%   |
| 0.358358 | 0.955805 | 0.487319 | 0.950914 | 1 | 5962 tags=46%, list=25%, signal=62%   |
| 0.238758 | 0.955772 | 0.635071 | 0.949836 | 1 | 4720 tags=29%, list=20%, signal=36%   |
| 0.361292 | 0.955342 | 0.49262  | 0.949966 | 1 | 6421 tags=46%, list=27%, signal=64%   |
| 0.30861  | 0.95471  | 0.566553 | 0.9504   | 1 | 1862 tags=17%, list=8%, signal=18%    |
| 0.26794  | 0.954276 | 0.533981 | 0.950401 | 1 | 4338 tags=34%, list=19%, signal=42%   |
| 0.315348 | 0.954086 | 0.576976 | 0.949717 | 1 | 3521 tags=32%, list=15%, signal=37%   |
| 0.317451 | 0.953942 | 0.525    | 0.948937 | 1 | 6369 tags=53%, list=27%, signal=72%   |
| 0.281915 | 0.953685 | 0.568628 | 0.948377 | 1 | 4125 tags=33%, list=18%, signal=40%   |

|          |          |          |          |   |                                     |
|----------|----------|----------|----------|---|-------------------------------------|
| 0.381503 | 0.953155 | 0.53578  | 0.948505 | 1 | 5246 tags=56%, list=22%, signal=73% |
| 0.436542 | 0.952852 | 0.518095 | 0.948148 | 1 | 5580 tags=50%, list=24%, signal=65% |
| 0.314904 | 0.952697 | 0.512563 | 0.947422 | 1 | 2470 tags=31%, list=11%, signal=34% |
| 0.243657 | 0.952577 | 0.511327 | 0.946621 | 1 | 5140 tags=31%, list=22%, signal=39% |
| 0.315165 | 0.952549 | 0.563218 | 0.945515 | 1 | 2375 tags=27%, list=10%, signal=30% |
| 0.315621 | 0.952534 | 0.502075 | 0.944391 | 1 | 3381 tags=21%, list=14%, signal=25% |
| 0.401258 | 0.951987 | 0.536585 | 0.944673 | 1 | 5777 tags=46%, list=25%, signal=61% |
| 0.355585 | 0.951782 | 0.546945 | 0.944052 | 1 | 3705 tags=36%, list=16%, signal=42% |
| 0.263623 | 0.951686 | 0.606232 | 0.94315  | 1 | 2619 tags=21%, list=11%, signal=23% |
| 0.369843 | 0.951544 | 0.547107 | 0.942407 | 1 | 6416 tags=49%, list=27%, signal=67% |
| 0.305761 | 0.951496 | 0.54359  | 0.941368 | 1 | 4683 tags=39%, list=20%, signal=48% |
| 0.448495 | 0.949542 | 0.558394 | 0.945762 | 1 | 5020 tags=48%, list=21%, signal=61% |
| 0.291958 | 0.949311 | 0.535354 | 0.945238 | 1 | 4993 tags=35%, list=21%, signal=44% |
| 0.356617 | 0.949177 | 0.591837 | 0.944439 | 1 | 3360 tags=34%, list=14%, signal=40% |
| 0.319531 | 0.949152 | 0.578773 | 0.943358 | 1 | 3576 tags=29%, list=15%, signal=34% |
| 0.369076 | 0.949033 | 0.570988 | 0.942561 | 1 | 2466 tags=31%, list=11%, signal=35% |
| 0.3531   | 0.948908 | 0.519481 | 0.94174  | 1 | 4773 tags=38%, list=20%, signal=48% |
| 0.348734 | 0.948752 | 0.502982 | 0.941013 | 1 | 4100 tags=36%, list=18%, signal=43% |
| 0.409176 | 0.94834  | 0.52552  | 0.940934 | 1 | 4802 tags=51%, list=21%, signal=64% |
| 0.361238 | 0.948129 | 0.537477 | 0.9404   | 1 | 3148 tags=31%, list=13%, signal=36% |
| 0.340233 | 0.947613 | 0.562271 | 0.940633 | 1 | 1387 tags=20%, list=6%, signal=21%  |
| 0.358307 | 0.947441 | 0.572289 | 0.93993  | 1 | 6909 tags=50%, list=30%, signal=71% |
| 0.253918 | 0.947125 | 0.524194 | 0.939605 | 1 | 2739 tags=22%, list=12%, signal=25% |
| 0.269802 | 0.946916 | 0.6048   | 0.939001 | 1 | 3725 tags=27%, list=16%, signal=32% |
| 0.398158 | 0.946884 | 0.550373 | 0.93796  | 1 | 5152 tags=35%, list=22%, signal=45% |
| 0.445462 | 0.946031 | 0.547349 | 0.939058 | 1 | 6095 tags=52%, list=26%, signal=70% |
| 0.478172 | 0.944638 | 0.647482 | 0.941756 | 1 | 5859 tags=56%, list=25%, signal=75% |
| 0.305024 | 0.94416  | 0.500778 | 0.941758 | 1 | 6423 tags=44%, list=27%, signal=61% |
| 0.317715 | 0.94379  | 0.531746 | 0.941609 | 1 | 3759 tags=30%, list=16%, signal=36% |
| 0.229119 | 0.943328 | 0.680481 | 0.941755 | 1 | 6051 tags=35%, list=26%, signal=47% |
| 0.327661 | 0.943195 | 0.556688 | 0.940916 | 1 | 4672 tags=35%, list=20%, signal=44% |
| 0.327799 | 0.943052 | 0.566973 | 0.940172 | 1 | 2664 tags=22%, list=11%, signal=25% |
| 0.405292 | 0.942989 | 0.548944 | 0.939217 | 1 | 2484 tags=33%, list=11%, signal=36% |
| 0.255143 | 0.942557 | 0.522152 | 0.939164 | 1 | 5930 tags=38%, list=25%, signal=50% |
| 0.273689 | 0.942135 | 0.563718 | 0.939264 | 1 | 5705 tags=39%, list=24%, signal=52% |
| 0.32839  | 0.942091 | 0.571429 | 0.938238 | 1 | 3044 tags=29%, list=13%, signal=33% |
| 0.287112 | 0.941923 | 0.519562 | 0.93755  | 1 | 5573 tags=52%, list=24%, signal=69% |
| 0.429629 | 0.941661 | 0.545794 | 0.937104 | 1 | 3851 tags=32%, list=16%, signal=38% |
| 0.264829 | 0.940684 | 0.583861 | 0.93859  | 1 | 4008 tags=30%, list=17%, signal=36% |
| 0.253417 | 0.939698 | 0.557692 | 0.940073 | 1 | 5857 tags=39%, list=25%, signal=51% |
| 0.363854 | 0.939572 | 0.505597 | 0.93931  | 1 | 5903 tags=46%, list=25%, signal=61% |
| 0.287115 | 0.939479 | 0.618026 | 0.938467 | 1 | 5473 tags=47%, list=23%, signal=61% |
| 0.276999 | 0.939311 | 0.598291 | 0.937719 | 1 | 3133 tags=27%, list=13%, signal=31% |
| 0.317117 | 0.93834  | 0.580938 | 0.939116 | 1 | 5272 tags=40%, list=23%, signal=52% |
| 0.311908 | 0.937988 | 0.613057 | 0.938917 | 1 | 6314 tags=47%, list=27%, signal=64% |
| 0.264758 | 0.937866 | 0.601969 | 0.938136 | 1 | 5761 tags=37%, list=25%, signal=49% |
| 0.261151 | 0.93732  | 0.616242 | 0.9384   | 1 | 2974 tags=22%, list=13%, signal=25% |
| 0.237291 | 0.937261 | 0.6277   | 0.937436 | 1 | 5283 tags=34%, list=23%, signal=43% |
| 0.315562 | 0.937164 | 0.590529 | 0.936624 | 1 | 5717 tags=41%, list=24%, signal=54% |
| 0.279555 | 0.936614 | 0.553448 | 0.936953 | 1 | 2566 tags=21%, list=11%, signal=23% |

|          |          |          |          |   |                                      |
|----------|----------|----------|----------|---|--------------------------------------|
| 0.355047 | 0.935952 | 0.508197 | 0.937476 | 1 | 6914 tags=52%, list=30%, signal=74%  |
| 0.285049 | 0.935183 | 0.545603 | 0.938304 | 1 | 3739 tags=26%, list=16%, signal=31%  |
| 0.318648 | 0.934756 | 0.551089 | 0.938274 | 1 | 2618 tags=24%, list=11%, signal=28%  |
| 0.306239 | 0.933875 | 0.701062 | 0.939327 | 1 | 3132 tags=31%, list=13%, signal=36%  |
| 0.273806 | 0.933758 | 0.62064  | 0.93854  | 1 | 5169 tags=35%, list=22%, signal=45%  |
| 0.377308 | 0.933699 | 0.584939 | 0.937599 | 1 | 5907 tags=40%, list=25%, signal=53%  |
| 0.343793 | 0.933675 | 0.568218 | 0.936592 | 1 | 2470 tags=27%, list=11%, signal=30%  |
| 0.293464 | 0.933264 | 0.605096 | 0.936629 | 1 | 2101 tags=14%, list=9%, signal=16%   |
| 0.235292 | 0.933152 | 0.613162 | 0.935814 | 1 | 4665 tags=29%, list=20%, signal=36%  |
| 0.291892 | 0.932593 | 0.511265 | 0.936241 | 1 | 2782 tags=29%, list=12%, signal=33%  |
| 0.503198 | 0.932537 | 0.567362 | 0.935305 | 1 | 5152 tags=53%, list=22%, signal=68%  |
| 0.400348 | 0.930924 | 0.64526  | 0.93835  | 1 | 5809 tags=56%, list=25%, signal=74%  |
| 0.309552 | 0.930476 | 0.574766 | 0.938531 | 1 | 7275 tags=49%, list=31%, signal=70%  |
| 0.280605 | 0.930461 | 0.59271  | 0.937495 | 1 | 2842 tags=21%, list=12%, signal=24%  |
| 0.380197 | 0.93031  | 0.54461  | 0.936758 | 1 | 5391 tags=47%, list=23%, signal=61%  |
| 0.285136 | 0.929822 | 0.625592 | 0.936831 | 1 | 2738 tags=21%, list=12%, signal=24%  |
| 0.305391 | 0.928356 | 0.544839 | 0.939577 | 1 | 3739 tags=29%, list=16%, signal=35%  |
| 0.315498 | 0.928163 | 0.50478  | 0.939042 | 1 | 3533 tags=23%, list=15%, signal=27%  |
| 0.432618 | 0.927705 | 0.564576 | 0.939146 | 1 | 6277 tags=62%, list=27%, signal=85%  |
| 0.310177 | 0.927371 | 0.529963 | 0.938945 | 1 | 2722 tags=27%, list=12%, signal=30%  |
| 0.271211 | 0.926596 | 0.590379 | 0.939921 | 1 | 3424 tags=26%, list=15%, signal=30%  |
| 0.324092 | 0.92631  | 0.609023 | 0.939541 | 1 | 4344 tags=31%, list=19%, signal=39%  |
| 0.302777 | 0.92564  | 0.606876 | 0.94014  | 1 | 3386 tags=30%, list=14%, signal=35%  |
| 0.358514 | 0.925563 | 0.569966 | 0.939266 | 1 | 6582 tags=47%, list=28%, signal=65%  |
| 0.284328 | 0.925193 | 0.604134 | 0.93904  | 1 | 5882 tags=43%, list=25%, signal=58%  |
| 0.242837 | 0.924332 | 0.545317 | 0.940115 | 1 | 4109 tags=28%, list=18%, signal=33%  |
| 0.455857 | 0.92415  | 0.616056 | 0.939522 | 1 | 5283 tags=53%, list=23%, signal=69%  |
| 0.406549 | 0.923826 | 0.582721 | 0.93938  | 1 | 7093 tags=58%, list=30%, signal=84%  |
| 0.332882 | 0.923714 | 0.533088 | 0.938572 | 1 | 4694 tags=35%, list=20%, signal=43%  |
| 0.252215 | 0.923121 | 0.699115 | 0.938979 | 1 | 3883 tags=28%, list=17%, signal=33%  |
| 0.281658 | 0.921983 | 0.59633  | 0.940742 | 1 | 3675 tags=29%, list=16%, signal=34%  |
| 0.27039  | 0.921949 | 0.554577 | 0.939769 | 1 | 5770 tags=35%, list=25%, signal=47%  |
| 0.282308 | 0.921883 | 0.602787 | 0.938854 | 1 | 2736 tags=20%, list=12%, signal=23%  |
| 0.239656 | 0.921349 | 0.659864 | 0.939102 | 1 | 5908 tags=37%, list=25%, signal=49%  |
| 0.326856 | 0.920565 | 0.553704 | 0.939956 | 1 | 3072 tags=30%, list=13%, signal=35%  |
| 0.290106 | 0.920289 | 0.613846 | 0.939544 | 1 | 3184 tags=21%, list=14%, signal=25%  |
| 0.27526  | 0.919843 | 0.561567 | 0.939565 | 1 | 7299 tags=44%, list=31%, signal=64%  |
| 0.319941 | 0.91851  | 0.564338 | 0.941777 | 1 | 5884 tags=40%, list=25%, signal=53%  |
| 0.480036 | 0.918187 | 0.573801 | 0.941562 | 1 | 8050 tags=77%, list=34%, signal=118% |
| 0.292975 | 0.917868 | 0.563973 | 0.941394 | 1 | 6171 tags=48%, list=26%, signal=66%  |
| 0.284941 | 0.917329 | 0.599026 | 0.941701 | 1 | 1732 tags=19%, list=7%, signal=21%   |
| 0.26809  | 0.917193 | 0.536458 | 0.94101  | 1 | 3161 tags=26%, list=13%, signal=30%  |
| 0.390511 | 0.916457 | 0.619211 | 0.941861 | 1 | 4625 tags=40%, list=20%, signal=50%  |
| 0.400406 | 0.915962 | 0.576655 | 0.942082 | 1 | 6004 tags=52%, list=26%, signal=70%  |
| 0.317199 | 0.915956 | 0.6      | 0.941043 | 1 | 2568 tags=23%, list=11%, signal=26%  |
| 0.290559 | 0.915667 | 0.624782 | 0.940643 | 1 | 3368 tags=26%, list=14%, signal=31%  |
| 0.31783  | 0.915365 | 0.588015 | 0.940351 | 1 | 7198 tags=60%, list=31%, signal=87%  |
| 0.343599 | 0.915317 | 0.622793 | 0.939433 | 1 | 4562 tags=37%, list=19%, signal=46%  |
| 0.389297 | 0.914842 | 0.569498 | 0.939609 | 1 | 7899 tags=61%, list=34%, signal=91%  |
| 0.235059 | 0.914774 | 0.698217 | 0.938712 | 1 | 2853 tags=21%, list=12%, signal=23%  |

|          |          |          |          |   |                                     |
|----------|----------|----------|----------|---|-------------------------------------|
| 0.238671 | 0.914594 | 0.728045 | 0.938096 | 1 | 5785 tags=35%, list=25%, signal=46% |
| 0.349225 | 0.914319 | 0.582011 | 0.93777  | 1 | 4887 tags=52%, list=21%, signal=65% |
| 0.272432 | 0.914048 | 0.547025 | 0.937355 | 1 | 5787 tags=37%, list=25%, signal=48% |
| 0.270145 | 0.913842 | 0.571906 | 0.936902 | 1 | 5857 tags=39%, list=25%, signal=52% |
| 0.314668 | 0.912768 | 0.583333 | 0.93867  | 1 | 1277 tags=20%, list=5%, signal=21%  |
| 0.28182  | 0.91249  | 0.578231 | 0.938342 | 1 | 3041 tags=25%, list=13%, signal=28% |
| 0.252475 | 0.912197 | 0.632964 | 0.937996 | 1 | 5847 tags=39%, list=25%, signal=52% |
| 0.340037 | 0.911818 | 0.5681   | 0.937944 | 1 | 3978 tags=38%, list=17%, signal=45% |
| 0.366657 | 0.911616 | 0.548701 | 0.937443 | 1 | 5564 tags=46%, list=24%, signal=60% |
| 0.356405 | 0.911329 | 0.525755 | 0.937173 | 1 | 5178 tags=52%, list=22%, signal=67% |
| 0.403283 | 0.911285 | 0.61426  | 0.936252 | 1 | 5152 tags=40%, list=22%, signal=51% |
| 0.35009  | 0.910881 | 0.587931 | 0.936178 | 1 | 7038 tags=60%, list=30%, signal=86% |
| 0.385089 | 0.91068  | 0.547619 | 0.935589 | 1 | 5580 tags=47%, list=24%, signal=61% |
| 0.29908  | 0.909871 | 0.526126 | 0.936471 | 1 | 5877 tags=39%, list=25%, signal=52% |
| 0.292277 | 0.909791 | 0.638261 | 0.935661 | 1 | 4404 tags=36%, list=19%, signal=44% |
| 0.269072 | 0.909774 | 0.605128 | 0.93468  | 1 | 5133 tags=34%, list=22%, signal=44% |
| 0.398948 | 0.909381 | 0.57393  | 0.93464  | 1 | 5482 tags=48%, list=23%, signal=63% |
| 0.332271 | 0.909259 | 0.566667 | 0.933967 | 1 | 5802 tags=40%, list=25%, signal=53% |
| 0.309508 | 0.908752 | 0.568421 | 0.934164 | 1 | 8033 tags=58%, list=34%, signal=88% |
| 0.346189 | 0.908635 | 0.597956 | 0.933412 | 1 | 2594 tags=31%, list=11%, signal=35% |
| 0.379491 | 0.908286 | 0.550285 | 0.933275 | 1 | 5952 tags=47%, list=25%, signal=62% |
| 0.332708 | 0.90803  | 0.616613 | 0.932925 | 1 | 6491 tags=50%, list=28%, signal=69% |
| 0.302622 | 0.908026 | 0.645609 | 0.931926 | 1 | 4146 tags=29%, list=18%, signal=35% |
| 0.337885 | 0.907747 | 0.530973 | 0.931637 | 1 | 5246 tags=40%, list=22%, signal=51% |
| 0.309342 | 0.907106 | 0.621818 | 0.932126 | 1 | 5465 tags=42%, list=23%, signal=55% |
| 0.328554 | 0.906777 | 0.588665 | 0.931961 | 1 | 1294 tags=20%, list=6%, signal=21%  |
| 0.337907 | 0.906666 | 0.61597  | 0.931205 | 1 | 1175 tags=21%, list=5%, signal=22%  |
| 0.326927 | 0.906587 | 0.555357 | 0.930393 | 1 | 5852 tags=48%, list=25%, signal=63% |
| 0.417255 | 0.906291 | 0.559041 | 0.930142 | 1 | 4797 tags=33%, list=20%, signal=42% |
| 0.325085 | 0.906285 | 0.600939 | 0.929157 | 1 | 4308 tags=32%, list=18%, signal=39% |
| 0.326058 | 0.906082 | 0.576512 | 0.928625 | 1 | 6053 tags=47%, list=26%, signal=63% |
| 0.229869 | 0.905467 | 0.763291 | 0.929052 | 1 | 3892 tags=25%, list=17%, signal=30% |
| 0.295904 | 0.905248 | 0.718519 | 0.928545 | 1 | 1374 tags=17%, list=6%, signal=18%  |
| 0.339639 | 0.904586 | 0.616822 | 0.929224 | 1 | 3848 tags=48%, list=16%, signal=58% |
| 0.425949 | 0.90448  | 0.629845 | 0.928524 | 1 | 5877 tags=55%, list=25%, signal=73% |
| 0.354618 | 0.903899 | 0.568471 | 0.928845 | 1 | 6499 tags=56%, list=28%, signal=77% |
| 0.273051 | 0.903728 | 0.664516 | 0.928288 | 1 | 4204 tags=31%, list=18%, signal=37% |
| 0.379326 | 0.903724 | 0.593592 | 0.927302 | 1 | 2839 tags=20%, list=12%, signal=23% |
| 0.259581 | 0.903712 | 0.647163 | 0.92634  | 1 | 6370 tags=36%, list=27%, signal=50% |
| 0.309407 | 0.903671 | 0.65008  | 0.925455 | 1 | 4818 tags=41%, list=21%, signal=52% |
| 0.294861 | 0.903579 | 0.603531 | 0.924684 | 1 | 2932 tags=25%, list=13%, signal=29% |
| 0.224553 | 0.902961 | 0.68369  | 0.9251   | 1 | 4665 tags=29%, list=20%, signal=36% |
| 0.236639 | 0.901957 | 0.693467 | 0.926511 | 1 | 5632 tags=34%, list=24%, signal=45% |
| 0.303766 | 0.901293 | 0.614754 | 0.926988 | 1 | 5208 tags=38%, list=22%, signal=48% |
| 0.237855 | 0.900715 | 0.679487 | 0.927325 | 1 | 2796 tags=23%, list=12%, signal=26% |
| 0.321289 | 0.900152 | 0.607023 | 0.927572 | 1 | 3375 tags=31%, list=14%, signal=36% |
| 0.247782 | 0.899171 | 0.612319 | 0.928892 | 1 | 5736 tags=35%, list=24%, signal=46% |
| 0.252146 | 0.89836  | 0.677698 | 0.929883 | 1 | 3381 tags=27%, list=14%, signal=31% |
| 0.26681  | 0.897766 | 0.696429 | 0.930245 | 1 | 5530 tags=39%, list=24%, signal=50% |
| 0.40574  | 0.897402 | 0.641953 | 0.93007  | 1 | 3036 tags=35%, list=13%, signal=41% |

|          |          |          |          |   |                                      |
|----------|----------|----------|----------|---|--------------------------------------|
| 0.32285  | 0.896839 | 0.570565 | 0.930408 | 1 | 4727 tags=39%, list=20%, signal=49%  |
| 0.295221 | 0.896726 | 0.591767 | 0.929683 | 1 | 4451 tags=30%, list=19%, signal=37%  |
| 0.315782 | 0.896725 | 0.607143 | 0.928716 | 1 | 5428 tags=36%, list=23%, signal=47%  |
| 0.27613  | 0.896623 | 0.627809 | 0.927901 | 1 | 5909 tags=37%, list=25%, signal=49%  |
| 0.442965 | 0.89654  | 0.590741 | 0.927124 | 1 | 8050 tags=67%, list=34%, signal=101% |
| 0.287959 | 0.896359 | 0.593807 | 0.926631 | 1 | 3869 tags=28%, list=17%, signal=34%  |
| 0.386898 | 0.895558 | 0.548023 | 0.927597 | 1 | 3825 tags=37%, list=16%, signal=44%  |
| 0.285936 | 0.895437 | 0.662441 | 0.926976 | 1 | 2027 tags=19%, list=9%, signal=20%   |
| 0.334226 | 0.895311 | 0.628425 | 0.926289 | 1 | 2966 tags=33%, list=13%, signal=38%  |
| 0.278192 | 0.895077 | 0.596745 | 0.925916 | 1 | 7439 tags=56%, list=32%, signal=81%  |
| 0.357429 | 0.894976 | 0.633758 | 0.925179 | 1 | 4963 tags=36%, list=21%, signal=46%  |
| 0.249552 | 0.894722 | 0.687302 | 0.924781 | 1 | 2415 tags=18%, list=10%, signal=20%  |
| 0.237035 | 0.89469  | 0.696275 | 0.923909 | 1 | 5651 tags=42%, list=24%, signal=55%  |
| 0.340302 | 0.894565 | 0.634892 | 0.923225 | 1 | 3327 tags=33%, list=14%, signal=39%  |
| 0.419964 | 0.894184 | 0.581921 | 0.923161 | 1 | 7965 tags=70%, list=34%, signal=105% |
| 0.280611 | 0.893672 | 0.663793 | 0.923446 | 1 | 5794 tags=42%, list=25%, signal=55%  |
| 0.27644  | 0.893164 | 0.634069 | 0.923695 | 1 | 2966 tags=24%, list=13%, signal=27%  |
| 0.317069 | 0.892622 | 0.647841 | 0.923962 | 1 | 2659 tags=28%, list=11%, signal=31%  |
| 0.252137 | 0.891703 | 0.646259 | 0.92506  | 1 | 3395 tags=27%, list=14%, signal=32%  |
| 0.248541 | 0.891    | 0.690583 | 0.925722 | 1 | 5465 tags=35%, list=23%, signal=45%  |
| 0.269985 | 0.890969 | 0.555716 | 0.924848 | 1 | 5908 tags=43%, list=25%, signal=57%  |
| 0.260778 | 0.8907   | 0.699837 | 0.924568 | 1 | 5044 tags=26%, list=22%, signal=34%  |
| 0.240651 | 0.890214 | 0.738028 | 0.924783 | 1 | 3048 tags=23%, list=13%, signal=27%  |
| 0.305505 | 0.889837 | 0.657556 | 0.924734 | 1 | 2466 tags=25%, list=11%, signal=28%  |
| 0.30961  | 0.889387 | 0.649148 | 0.924872 | 1 | 5523 tags=36%, list=24%, signal=47%  |
| 0.268263 | 0.889164 | 0.643505 | 0.924452 | 1 | 2816 tags=23%, list=12%, signal=26%  |
| 0.27178  | 0.888989 | 0.727666 | 0.923854 | 1 | 2722 tags=26%, list=12%, signal=29%  |
| 0.32279  | 0.8881   | 0.614853 | 0.925002 | 1 | 6100 tags=45%, list=26%, signal=61%  |
| 0.383288 | 0.887972 | 0.562738 | 0.924325 | 1 | 5421 tags=47%, list=23%, signal=61%  |
| 0.26689  | 0.887948 | 0.655987 | 0.923424 | 1 | 4204 tags=31%, list=18%, signal=38%  |
| 0.288135 | 0.887737 | 0.673701 | 0.922915 | 1 | 4108 tags=30%, list=18%, signal=36%  |
| 0.404094 | 0.8876   | 0.566728 | 0.922324 | 1 | 7901 tags=66%, list=34%, signal=99%  |
| 0.250788 | 0.88743  | 0.676638 | 0.921722 | 1 | 5593 tags=37%, list=24%, signal=48%  |
| 0.279977 | 0.886987 | 0.770227 | 0.921729 | 1 | 4143 tags=30%, list=18%, signal=37%  |
| 0.318836 | 0.886961 | 0.574861 | 0.920865 | 1 | 5868 tags=41%, list=25%, signal=55%  |
| 0.381205 | 0.886898 | 0.568015 | 0.9201   | 1 | 4802 tags=48%, list=21%, signal=60%  |
| 0.272981 | 0.886191 | 0.637771 | 0.920738 | 1 | 2522 tags=21%, list=11%, signal=24%  |
| 0.339268 | 0.885918 | 0.592087 | 0.92044  | 1 | 5713 tags=50%, list=24%, signal=66%  |
| 0.445807 | 0.885539 | 0.643178 | 0.920316 | 1 | 6315 tags=65%, list=27%, signal=88%  |
| 0.323948 | 0.885453 | 0.710456 | 0.919593 | 1 | 4243 tags=42%, list=18%, signal=52%  |
| 0.28659  | 0.884914 | 0.731278 | 0.920014 | 1 | 3500 tags=28%, list=15%, signal=32%  |
| 0.340001 | 0.884676 | 0.588785 | 0.919686 | 1 | 5020 tags=44%, list=21%, signal=56%  |
| 0.336808 | 0.884597 | 0.630182 | 0.918951 | 1 | 3786 tags=32%, list=16%, signal=38%  |
| 0.315263 | 0.884469 | 0.689597 | 0.918288 | 1 | 3062 tags=33%, list=13%, signal=38%  |
| 0.239858 | 0.884422 | 0.725086 | 0.917467 | 1 | 3633 tags=23%, list=16%, signal=27%  |
| 0.28719  | 0.884065 | 0.67033  | 0.917423 | 1 | 6033 tags=40%, list=26%, signal=53%  |
| 0.217539 | 0.883922 | 0.784993 | 0.916849 | 1 | 3449 tags=23%, list=15%, signal=27%  |
| 0.31324  | 0.883235 | 0.61244  | 0.917559 | 1 | 5433 tags=33%, list=23%, signal=43%  |
| 0.358189 | 0.882764 | 0.636929 | 0.917779 | 1 | 2470 tags=33%, list=11%, signal=37%  |
| 0.306522 | 0.882642 | 0.678238 | 0.917102 | 1 | 6854 tags=53%, list=29%, signal=75%  |



|          |          |          |          |   |                                      |
|----------|----------|----------|----------|---|--------------------------------------|
| 0.309816 | 0.882412 | 0.606272 | 0.916699 | 1 | 5339 tags=43%, list=23%, signal=56%  |
| 0.317789 | 0.882382 | 0.688496 | 0.915879 | 1 | 9034 tags=69%, list=39%, signal=112% |
| 0.297901 | 0.881367 | 0.613126 | 0.917173 | 1 | 3419 tags=21%, list=15%, signal=24%  |
| 0.254159 | 0.880634 | 0.705247 | 0.91782  | 1 | 2952 tags=21%, list=13%, signal=24%  |
| 0.322018 | 0.880163 | 0.695868 | 0.917953 | 1 | 5107 tags=28%, list=22%, signal=35%  |
| 0.27782  | 0.87999  | 0.679856 | 0.917397 | 1 | 1301 tags=11%, list=6%, signal=11%   |
| 0.298666 | 0.87994  | 0.609428 | 0.916606 | 1 | 2416 tags=26%, list=10%, signal=29%  |
| 0.329523 | 0.879925 | 0.674174 | 0.915733 | 1 | 5474 tags=33%, list=23%, signal=43%  |
| 0.412457 | 0.879723 | 0.615672 | 0.915309 | 1 | 3870 tags=27%, list=17%, signal=33%  |
| 0.251635 | 0.879594 | 0.697161 | 0.914665 | 1 | 4268 tags=30%, list=18%, signal=37%  |
| 0.246482 | 0.879427 | 0.66766  | 0.914152 | 1 | 4981 tags=32%, list=21%, signal=41%  |
| 0.252715 | 0.879315 | 0.70015  | 0.91349  | 1 | 5918 tags=38%, list=25%, signal=50%  |
| 0.30934  | 0.878542 | 0.734597 | 0.914265 | 1 | 4321 tags=39%, list=18%, signal=48%  |
| 0.338761 | 0.878417 | 0.655116 | 0.913635 | 1 | 3725 tags=40%, list=16%, signal=48%  |
| 0.316379 | 0.878136 | 0.655436 | 0.913377 | 1 | 4268 tags=43%, list=18%, signal=52%  |
| 0.303955 | 0.87804  | 0.676752 | 0.912707 | 1 | 3391 tags=33%, list=14%, signal=38%  |
| 0.385751 | 0.877946 | 0.674536 | 0.911974 | 1 | 5108 tags=42%, list=22%, signal=54%  |
| 0.353351 | 0.877808 | 0.717687 | 0.911433 | 1 | 3072 tags=40%, list=13%, signal=46%  |
| 0.370646 | 0.877718 | 0.614341 | 0.910696 | 1 | 5020 tags=39%, list=21%, signal=50%  |
| 0.279381 | 0.8774   | 0.69702  | 0.910549 | 1 | 4599 tags=34%, list=20%, signal=42%  |
| 0.352755 | 0.876841 | 0.656301 | 0.910933 | 1 | 6960 tags=55%, list=30%, signal=79%  |
| 0.332918 | 0.876816 | 0.629565 | 0.910095 | 1 | 6733 tags=38%, list=29%, signal=53%  |
| 0.296464 | 0.876576 | 0.666201 | 0.909728 | 1 | 3833 tags=32%, list=16%, signal=38%  |
| 0.242875 | 0.876432 | 0.687692 | 0.909172 | 1 | 4428 tags=31%, list=19%, signal=37%  |
| 0.262653 | 0.875505 | 0.649469 | 0.910262 | 1 | 3592 tags=27%, list=15%, signal=31%  |
| 0.305726 | 0.875257 | 0.616341 | 0.909877 | 1 | 3161 tags=29%, list=13%, signal=34%  |
| 0.37815  | 0.873751 | 0.703959 | 0.912408 | 1 | 5642 tags=52%, list=24%, signal=68%  |
| 0.260374 | 0.873305 | 0.699377 | 0.912457 | 1 | 3323 tags=24%, list=14%, signal=27%  |
| 0.315776 | 0.871717 | 0.696309 | 0.915191 | 1 | 5475 tags=32%, list=23%, signal=42%  |
| 0.264722 | 0.87108  | 0.769671 | 0.915629 | 1 | 7094 tags=42%, list=30%, signal=60%  |
| 0.296398 | 0.870814 | 0.675039 | 0.915354 | 1 | 5246 tags=38%, list=22%, signal=49%  |
| 0.306531 | 0.869963 | 0.606947 | 0.91626  | 1 | 4347 tags=24%, list=19%, signal=29%  |
| 0.22441  | 0.869757 | 0.798649 | 0.915774 | 1 | 4711 tags=27%, list=20%, signal=34%  |
| 0.302075 | 0.869033 | 0.6832   | 0.916529 | 1 | 4189 tags=32%, list=18%, signal=39%  |
| 0.325865 | 0.867702 | 0.590226 | 0.918653 | 1 | 5627 tags=40%, list=24%, signal=52%  |
| 0.271835 | 0.867653 | 0.600649 | 0.917878 | 1 | 5584 tags=37%, list=24%, signal=48%  |
| 0.425499 | 0.867557 | 0.624074 | 0.91716  | 1 | 6859 tags=58%, list=29%, signal=82%  |
| 0.370014 | 0.867469 | 0.626118 | 0.916433 | 1 | 5378 tags=50%, list=23%, signal=65%  |
| 0.318366 | 0.867455 | 0.611807 | 0.915575 | 1 | 5428 tags=40%, list=23%, signal=52%  |
| 0.31001  | 0.867105 | 0.651543 | 0.915489 | 1 | 2470 tags=25%, list=11%, signal=28%  |
| 0.267004 | 0.866732 | 0.728997 | 0.915356 | 1 | 5298 tags=39%, list=23%, signal=50%  |
| 0.282666 | 0.866243 | 0.641286 | 0.915546 | 1 | 5857 tags=50%, list=25%, signal=67%  |
| 0.391604 | 0.866023 | 0.609108 | 0.915138 | 1 | 4514 tags=46%, list=19%, signal=57%  |
| 0.310661 | 0.865676 | 0.582878 | 0.915031 | 1 | 4755 tags=34%, list=20%, signal=42%  |
| 0.270167 | 0.865484 | 0.729345 | 0.914593 | 1 | 2974 tags=29%, list=13%, signal=33%  |
| 0.333458 | 0.864825 | 0.627151 | 0.915103 | 1 | 7600 tags=51%, list=32%, signal=76%  |
| 0.254651 | 0.864161 | 0.735474 | 0.915738 | 1 | 7506 tags=45%, list=32%, signal=66%  |
| 0.266006 | 0.86414  | 0.691265 | 0.914901 | 1 | 6068 tags=42%, list=26%, signal=57%  |
| 0.26653  | 0.863693 | 0.6608   | 0.914928 | 1 | 4575 tags=29%, list=20%, signal=36%  |
| 0.323886 | 0.863686 | 0.68871  | 0.914068 | 1 | 5283 tags=50%, list=23%, signal=65%  |

|          |          |          |          |   |                                     |
|----------|----------|----------|----------|---|-------------------------------------|
| 0.260631 | 0.863675 | 0.697324 | 0.913216 | 1 | 3195 tags=23%, list=14%, signal=26% |
| 0.283878 | 0.863556 | 0.795082 | 0.912604 | 1 | 3082 tags=34%, list=13%, signal=40% |
| 0.237307 | 0.86287  | 0.762295 | 0.913209 | 1 | 4237 tags=25%, list=18%, signal=31% |
| 0.395757 | 0.862512 | 0.616387 | 0.913153 | 1 | 5020 tags=47%, list=21%, signal=60% |
| 0.306819 | 0.861839 | 0.653916 | 0.913705 | 1 | 966 tags=20%, list=4%, signal=20%   |
| 0.378719 | 0.861811 | 0.731482 | 0.912928 | 1 | 6052 tags=43%, list=26%, signal=59% |
| 0.30886  | 0.861657 | 0.7031   | 0.912411 | 1 | 5445 tags=41%, list=23%, signal=53% |
| 0.23529  | 0.861404 | 0.720497 | 0.912123 | 1 | 3708 tags=26%, list=16%, signal=31% |
| 0.258888 | 0.861119 | 0.70442  | 0.911889 | 1 | 5150 tags=35%, list=22%, signal=44% |
| 0.263611 | 0.85989  | 0.70547  | 0.913608 | 1 | 5026 tags=33%, list=21%, signal=42% |
| 0.328476 | 0.859781 | 0.620451 | 0.912995 | 1 | 7874 tags=53%, list=34%, signal=79% |
| 0.313006 | 0.85973  | 0.690566 | 0.912251 | 1 | 6314 tags=40%, list=27%, signal=55% |
| 0.257662 | 0.859122 | 0.71722  | 0.912638 | 1 | 2451 tags=22%, list=10%, signal=24% |
| 0.341225 | 0.859058 | 0.65744  | 0.911918 | 1 | 5796 tags=47%, list=25%, signal=62% |
| 0.270706 | 0.858949 | 0.756494 | 0.911325 | 1 | 3453 tags=30%, list=15%, signal=35% |
| 0.208484 | 0.858523 | 0.876056 | 0.91138  | 1 | 5857 tags=29%, list=25%, signal=39% |
| 0.236627 | 0.858069 | 0.810888 | 0.911403 | 1 | 5878 tags=36%, list=25%, signal=48% |
| 0.250732 | 0.856806 | 0.803523 | 0.913256 | 1 | 4322 tags=31%, list=18%, signal=38% |
| 0.349738 | 0.856619 | 0.642857 | 0.912825 | 1 | 4802 tags=44%, list=21%, signal=55% |
| 0.343301 | 0.856145 | 0.669368 | 0.912908 | 1 | 5026 tags=38%, list=21%, signal=48% |
| 0.315338 | 0.855993 | 0.704293 | 0.912346 | 1 | 3661 tags=40%, list=16%, signal=47% |
| 0.340252 | 0.855696 | 0.641326 | 0.91216  | 1 | 5452 tags=44%, list=23%, signal=57% |
| 0.24422  | 0.854199 | 0.768116 | 0.914403 | 1 | 7559 tags=50%, list=32%, signal=74% |
| 0.258808 | 0.854189 | 0.809524 | 0.91357  | 1 | 438 tags=12%, list=2%, signal=12%   |
| 0.298184 | 0.854121 | 0.72619  | 0.912831 | 1 | 5857 tags=33%, list=25%, signal=44% |
| 0.269182 | 0.853772 | 0.579848 | 0.912659 | 1 | 5671 tags=36%, list=24%, signal=47% |
| 0.292123 | 0.853759 | 0.814077 | 0.911832 | 1 | 1884 tags=24%, list=8%, signal=26%  |
| 0.31761  | 0.853393 | 0.641682 | 0.911709 | 1 | 5923 tags=41%, list=25%, signal=54% |
| 0.35288  | 0.852879 | 0.590226 | 0.912003 | 1 | 4388 tags=36%, list=19%, signal=44% |
| 0.317618 | 0.852513 | 0.591241 | 0.911941 | 1 | 5612 tags=45%, list=24%, signal=59% |
| 0.321478 | 0.852341 | 0.697436 | 0.91145  | 1 | 2597 tags=33%, list=11%, signal=37% |
| 0.286835 | 0.852303 | 0.623352 | 0.910677 | 1 | 5760 tags=41%, list=25%, signal=54% |
| 0.220004 | 0.851994 | 0.771341 | 0.910408 | 1 | 4546 tags=25%, list=19%, signal=31% |
| 0.286465 | 0.851807 | 0.74359  | 0.909919 | 1 | 1187 tags=14%, list=5%, signal=15%  |
| 0.28562  | 0.851323 | 0.654412 | 0.910037 | 1 | 7998 tags=52%, list=34%, signal=78% |
| 0.324306 | 0.851301 | 0.660142 | 0.909247 | 1 | 5857 tags=43%, list=25%, signal=57% |
| 0.368428 | 0.851208 | 0.568047 | 0.908596 | 1 | 6167 tags=43%, list=26%, signal=58% |
| 0.303094 | 0.850652 | 0.744224 | 0.908807 | 1 | 5060 tags=33%, list=22%, signal=42% |
| 0.329457 | 0.850474 | 0.642593 | 0.908306 | 1 | 3944 tags=34%, list=17%, signal=41% |
| 0.228328 | 0.849843 | 0.737303 | 0.908788 | 1 | 6416 tags=34%, list=27%, signal=47% |
| 0.261232 | 0.849803 | 0.79483  | 0.908056 | 1 | 5397 tags=33%, list=23%, signal=43% |
| 0.43601  | 0.848762 | 0.621377 | 0.909337 | 1 | 8059 tags=60%, list=34%, signal=91% |
| 0.381513 | 0.847304 | 0.669935 | 0.91153  | 1 | 4591 tags=35%, list=20%, signal=43% |
| 0.2803   | 0.846201 | 0.712251 | 0.912934 | 1 | 7448 tags=43%, list=32%, signal=63% |
| 0.408646 | 0.845889 | 0.702417 | 0.912756 | 1 | 6315 tags=58%, list=27%, signal=80% |
| 0.297723 | 0.845101 | 0.720749 | 0.913564 | 1 | 5868 tags=44%, list=25%, signal=59% |
| 0.245883 | 0.844434 | 0.781437 | 0.914041 | 1 | 5882 tags=44%, list=25%, signal=59% |
| 0.230168 | 0.844125 | 0.749594 | 0.91383  | 1 | 4640 tags=27%, list=20%, signal=33% |
| 0.311004 | 0.844004 | 0.745066 | 0.913258 | 1 | 3835 tags=26%, list=16%, signal=31% |
| 0.266518 | 0.84394  | 0.709122 | 0.912557 | 1 | 4277 tags=29%, list=18%, signal=35% |

|          |          |          |          |   |                                      |
|----------|----------|----------|----------|---|--------------------------------------|
| 0.33292  | 0.843763 | 0.6832   | 0.91205  | 1 | 6018 tags=53%, list=26%, signal=71%  |
| 0.284055 | 0.843392 | 0.75614  | 0.911877 | 1 | 3371 tags=29%, list=14%, signal=33%  |
| 0.314229 | 0.843245 | 0.684127 | 0.911406 | 1 | 5796 tags=55%, list=25%, signal=73%  |
| 0.376094 | 0.843124 | 0.684783 | 0.910802 | 1 | 5152 tags=38%, list=22%, signal=48%  |
| 0.274155 | 0.84202  | 0.791476 | 0.912096 | 1 | 3375 tags=28%, list=14%, signal=33%  |
| 0.318515 | 0.841671 | 0.659537 | 0.911947 | 1 | 4319 tags=35%, list=18%, signal=43%  |
| 0.349524 | 0.841349 | 0.631068 | 0.911749 | 1 | 2007 tags=25%, list=9%, signal=27%   |
| 0.365249 | 0.838961 | 0.621723 | 0.915801 | 1 | 6502 tags=50%, list=28%, signal=69%  |
| 0.346749 | 0.838914 | 0.661211 | 0.915074 | 1 | 5885 tags=45%, list=25%, signal=60%  |
| 0.264223 | 0.838559 | 0.76197  | 0.914932 | 1 | 3467 tags=28%, list=15%, signal=33%  |
| 0.275934 | 0.838502 | 0.828841 | 0.914258 | 1 | 4243 tags=36%, list=18%, signal=44%  |
| 0.292122 | 0.838363 | 0.721843 | 0.913682 | 1 | 1959 tags=20%, list=8%, signal=22%   |
| 0.226296 | 0.837687 | 0.854667 | 0.914137 | 1 | 5670 tags=34%, list=24%, signal=44%  |
| 0.329782 | 0.837583 | 0.657143 | 0.913599 | 1 | 3764 tags=34%, list=16%, signal=40%  |
| 0.3293   | 0.837158 | 0.742402 | 0.913636 | 1 | 253 tags=15%, list=1%, signal=15%    |
| 0.225392 | 0.837041 | 0.775036 | 0.913061 | 1 | 3583 tags=23%, list=15%, signal=27%  |
| 0.385148 | 0.836376 | 0.643275 | 0.913601 | 1 | 5020 tags=42%, list=21%, signal=54%  |
| 0.26491  | 0.836041 | 0.713826 | 0.913363 | 1 | 4332 tags=30%, list=18%, signal=37%  |
| 0.31781  | 0.835971 | 0.716561 | 0.912666 | 1 | 5696 tags=35%, list=24%, signal=46%  |
| 0.268559 | 0.835589 | 0.758621 | 0.91266  | 1 | 6185 tags=40%, list=26%, signal=54%  |
| 0.245211 | 0.835551 | 0.75     | 0.911928 | 1 | 5128 tags=32%, list=22%, signal=41%  |
| 0.235808 | 0.835064 | 0.732143 | 0.912003 | 1 | 5285 tags=29%, list=23%, signal=37%  |
| 0.337201 | 0.834265 | 0.715771 | 0.91264  | 1 | 382 tags=21%, list=2%, signal=21%    |
| 0.346384 | 0.834133 | 0.689524 | 0.912051 | 1 | 3602 tags=37%, list=15%, signal=44%  |
| 0.255719 | 0.83412  | 0.709677 | 0.911267 | 1 | 5857 tags=37%, list=25%, signal=49%  |
| 0.280914 | 0.833975 | 0.753582 | 0.910703 | 1 | 2601 tags=24%, list=11%, signal=27%  |
| 0.276232 | 0.833548 | 0.7616   | 0.910682 | 1 | 2738 tags=27%, list=12%, signal=31%  |
| 0.330011 | 0.8327   | 0.694915 | 0.911526 | 1 | 2921 tags=31%, list=12%, signal=36%  |
| 0.235241 | 0.832604 | 0.800664 | 0.910948 | 1 | 6282 tags=38%, list=27%, signal=51%  |
| 0.351029 | 0.830523 | 0.715909 | 0.914255 | 1 | 3737 tags=38%, list=16%, signal=44%  |
| 0.267773 | 0.829936 | 0.768982 | 0.914583 | 1 | 3710 tags=27%, list=16%, signal=32%  |
| 0.355384 | 0.829799 | 0.612245 | 0.914005 | 1 | 3764 tags=38%, list=16%, signal=45%  |
| 0.310948 | 0.828675 | 0.616105 | 0.915301 | 1 | 5644 tags=41%, list=24%, signal=53%  |
| 0.263054 | 0.827829 | 0.730129 | 0.916107 | 1 | 3280 tags=24%, list=14%, signal=28%  |
| 0.26935  | 0.827775 | 0.791111 | 0.915417 | 1 | 4816 tags=35%, list=21%, signal=44%  |
| 0.235233 | 0.827469 | 0.727586 | 0.915141 | 1 | 1485 tags=11%, list=6%, signal=12%   |
| 0.230519 | 0.827147 | 0.791379 | 0.91501  | 1 | 4519 tags=28%, list=19%, signal=34%  |
| 0.330082 | 0.827119 | 0.664336 | 0.914248 | 1 | 3375 tags=29%, list=14%, signal=33%  |
| 0.340583 | 0.825573 | 0.617702 | 0.91631  | 1 | 5547 tags=40%, list=24%, signal=52%  |
| 0.283489 | 0.824273 | 0.766423 | 0.917911 | 1 | 5673 tags=42%, list=24%, signal=55%  |
| 0.294825 | 0.823714 | 0.688925 | 0.918187 | 1 | 4559 tags=39%, list=19%, signal=48%  |
| 0.271271 | 0.823478 | 0.765958 | 0.917834 | 1 | 2192 tags=22%, list=9%, signal=24%   |
| 0.307187 | 0.822932 | 0.744373 | 0.918048 | 1 | 697 tags=12%, list=3%, signal=12%    |
| 0.240533 | 0.821839 | 0.739583 | 0.919208 | 1 | 4800 tags=33%, list=20%, signal=41%  |
| 0.270525 | 0.821738 | 0.819005 | 0.918584 | 1 | 4996 tags=40%, list=21%, signal=51%  |
| 0.289156 | 0.821695 | 0.711039 | 0.917847 | 1 | 4972 tags=30%, list=21%, signal=38%  |
| 0.269046 | 0.820748 | 0.790551 | 0.918717 | 1 | 6321 tags=45%, list=27%, signal=62%  |
| 0.467806 | 0.819889 | 0.699812 | 0.919506 | 1 | 7858 tags=81%, list=34%, signal=122% |
| 0.282946 | 0.81855  | 0.700717 | 0.921031 | 1 | 7474 tags=53%, list=32%, signal=78%  |
| 0.319724 | 0.818293 | 0.736091 | 0.920692 | 1 | 3975 tags=33%, list=17%, signal=40%  |

|          |          |          |          |   |                                      |
|----------|----------|----------|----------|---|--------------------------------------|
| 0.256524 | 0.816826 | 0.789292 | 0.922554 | 1 | 3704 tags=29%, list=16%, signal=34%  |
| 0.350431 | 0.816647 | 0.801399 | 0.922058 | 1 | 4404 tags=47%, list=19%, signal=58%  |
| 0.333846 | 0.81642  | 0.722936 | 0.921654 | 1 | 4227 tags=44%, list=18%, signal=53%  |
| 0.234198 | 0.816191 | 0.813665 | 0.921295 | 1 | 2966 tags=23%, list=13%, signal=26%  |
| 0.363888 | 0.814062 | 0.666667 | 0.92434  | 1 | 5846 tags=59%, list=25%, signal=79%  |
| 0.270551 | 0.814003 | 0.8      | 0.92365  | 1 | 5608 tags=41%, list=24%, signal=54%  |
| 0.338791 | 0.813431 | 0.627451 | 0.923818 | 1 | 7008 tags=54%, list=30%, signal=77%  |
| 0.364357 | 0.813075 | 0.708075 | 0.923628 | 1 | 2245 tags=31%, list=10%, signal=35%  |
| 0.261792 | 0.812665 | 0.793781 | 0.923531 | 1 | 5777 tags=45%, list=25%, signal=59%  |
| 0.33642  | 0.812399 | 0.722034 | 0.923227 | 1 | 7774 tags=59%, list=33%, signal=88%  |
| 0.258229 | 0.810715 | 0.747069 | 0.925528 | 1 | 4726 tags=34%, list=20%, signal=43%  |
| 0.229909 | 0.809822 | 0.841018 | 0.926333 | 1 | 3582 tags=23%, list=15%, signal=27%  |
| 0.276105 | 0.809701 | 0.822504 | 0.925758 | 1 | 3777 tags=32%, list=16%, signal=38%  |
| 0.274148 | 0.809612 | 0.77812  | 0.925152 | 1 | 3293 tags=28%, list=14%, signal=32%  |
| 0.261572 | 0.809161 | 0.863014 | 0.925156 | 1 | 2601 tags=20%, list=11%, signal=22%  |
| 0.254159 | 0.80901  | 0.748175 | 0.924634 | 1 | 5890 tags=32%, list=25%, signal=42%  |
| 0.254472 | 0.808097 | 0.759921 | 0.925521 | 1 | 3389 tags=25%, list=14%, signal=29%  |
| 0.236374 | 0.806699 | 0.874797 | 0.927077 | 1 | 7439 tags=48%, list=32%, signal=70%  |
| 0.240413 | 0.806546 | 0.825352 | 0.926556 | 1 | 3817 tags=24%, list=16%, signal=28%  |
| 0.297661 | 0.806177 | 0.788732 | 0.926479 | 1 | 2594 tags=20%, list=11%, signal=22%  |
| 0.263645 | 0.804148 | 0.887324 | 0.929381 | 1 | 6112 tags=41%, list=26%, signal=55%  |
| 0.35619  | 0.804122 | 0.702448 | 0.928646 | 1 | 7635 tags=45%, list=33%, signal=66%  |
| 0.291593 | 0.804018 | 0.80102  | 0.92806  | 1 | 4208 tags=31%, list=18%, signal=38%  |
| 0.280465 | 0.803727 | 0.639042 | 0.927813 | 1 | 5353 tags=36%, list=23%, signal=46%  |
| 0.254917 | 0.801218 | 0.666102 | 0.931369 | 1 | 3672 tags=22%, list=16%, signal=26%  |
| 0.278957 | 0.800319 | 0.748175 | 0.932102 | 1 | 3381 tags=26%, list=14%, signal=30%  |
| 0.245368 | 0.799698 | 0.832861 | 0.932321 | 1 | 5673 tags=39%, list=24%, signal=52%  |
| 0.310328 | 0.799506 | 0.794258 | 0.931889 | 1 | 926 tags=13%, list=4%, signal=14%    |
| 0.32298  | 0.799174 | 0.76507  | 0.931638 | 1 | 642 tags=12%, list=3%, signal=12%    |
| 0.308661 | 0.798818 | 0.802432 | 0.93144  | 1 | 2518 tags=28%, list=11%, signal=31%  |
| 0.402523 | 0.798597 | 0.714822 | 0.931055 | 1 | 5020 tags=37%, list=21%, signal=46%  |
| 0.286748 | 0.797892 | 0.816529 | 0.931551 | 1 | 5696 tags=39%, list=24%, signal=52%  |
| 0.248529 | 0.797749 | 0.784588 | 0.930983 | 1 | 6282 tags=36%, list=27%, signal=49%  |
| 0.359368 | 0.797684 | 0.648936 | 0.930331 | 1 | 7082 tags=63%, list=30%, signal=90%  |
| 0.322688 | 0.797082 | 0.763889 | 0.930563 | 1 | 2286 tags=25%, list=10%, signal=28%  |
| 0.281386 | 0.797024 | 0.721854 | 0.929877 | 1 | 4248 tags=36%, list=18%, signal=44%  |
| 0.401202 | 0.796905 | 0.75     | 0.929304 | 1 | 8282 tags=67%, list=35%, signal=103% |
| 0.301454 | 0.796196 | 0.672535 | 0.929711 | 1 | 4900 tags=39%, list=21%, signal=49%  |
| 0.296383 | 0.795292 | 0.829755 | 0.9305   | 1 | 5270 tags=42%, list=23%, signal=54%  |
| 0.251841 | 0.794864 | 0.716607 | 0.930466 | 1 | 5939 tags=38%, list=25%, signal=51%  |
| 0.254292 | 0.794526 | 0.683616 | 0.930231 | 1 | 5349 tags=32%, list=23%, signal=41%  |
| 0.356034 | 0.793405 | 0.645098 | 0.931316 | 1 | 5428 tags=43%, list=23%, signal=56%  |
| 0.283078 | 0.792049 | 0.791878 | 0.932767 | 1 | 5777 tags=28%, list=25%, signal=37%  |
| 0.364913 | 0.792044 | 0.713761 | 0.931998 | 1 | 4797 tags=29%, list=20%, signal=37%  |
| 0.225751 | 0.790823 | 0.818038 | 0.933244 | 1 | 5857 tags=39%, list=25%, signal=52%  |
| 0.285105 | 0.790711 | 0.859568 | 0.932658 | 1 | 6655 tags=56%, list=28%, signal=78%  |
| 0.239823 | 0.790578 | 0.882726 | 0.932098 | 1 | 5786 tags=35%, list=25%, signal=47%  |
| 0.228653 | 0.790258 | 0.734993 | 0.93193  | 1 | 4708 tags=31%, list=20%, signal=38%  |
| 0.32033  | 0.790033 | 0.810594 | 0.931552 | 1 | 3398 tags=26%, list=15%, signal=31%  |
| 0.252185 | 0.789971 | 0.782759 | 0.930898 | 1 | 2054 tags=19%, list=9%, signal=21%   |

|          |          |          |          |   |                                     |
|----------|----------|----------|----------|---|-------------------------------------|
| 0.255851 | 0.789257 | 0.798987 | 0.93128  | 1 | 7362 tags=52%, list=31%, signal=75% |
| 0.324485 | 0.78819  | 0.721368 | 0.932249 | 1 | 1655 tags=20%, list=7%, signal=22%  |
| 0.234699 | 0.787445 | 0.877947 | 0.932652 | 1 | 6213 tags=36%, list=27%, signal=49% |
| 0.251223 | 0.785172 | 0.75576  | 0.935581 | 1 | 5909 tags=38%, list=25%, signal=51% |
| 0.288905 | 0.784834 | 0.802023 | 0.935369 | 1 | 5593 tags=48%, list=24%, signal=63% |
| 0.21708  | 0.783098 | 0.87092  | 0.937368 | 1 | 3371 tags=20%, list=14%, signal=24% |
| 0.225738 | 0.783093 | 0.86014  | 0.936621 | 1 | 5882 tags=40%, list=25%, signal=53% |
| 0.319073 | 0.781273 | 0.750831 | 0.938705 | 1 | 5717 tags=50%, list=24%, signal=66% |
| 0.263395 | 0.780888 | 0.827869 | 0.938511 | 1 | 4860 tags=36%, list=21%, signal=46% |
| 0.346982 | 0.780428 | 0.7061   | 0.938481 | 1 | 4739 tags=45%, list=20%, signal=56% |
| 0.292183 | 0.779929 | 0.720268 | 0.938552 | 1 | 1043 tags=14%, list=4%, signal=15%  |
| 0.229845 | 0.778742 | 0.790105 | 0.939656 | 1 | 6436 tags=44%, list=27%, signal=60% |
| 0.265741 | 0.77723  | 0.845277 | 0.941305 | 1 | 3632 tags=26%, list=16%, signal=31% |
| 0.30146  | 0.776954 | 0.77621  | 0.940933 | 1 | 2739 tags=22%, list=12%, signal=25% |
| 0.231254 | 0.774845 | 0.883683 | 0.943445 | 1 | 3276 tags=21%, list=14%, signal=25% |
| 0.242355 | 0.774451 | 0.798013 | 0.943238 | 1 | 5919 tags=40%, list=25%, signal=53% |
| 0.262108 | 0.774111 | 0.741936 | 0.943018 | 1 | 6680 tags=36%, list=29%, signal=50% |
| 0.372941 | 0.772633 | 0.808349 | 0.94461  | 1 | 5396 tags=41%, list=23%, signal=54% |
| 0.300926 | 0.772433 | 0.773109 | 0.944124 | 1 | 7212 tags=53%, list=31%, signal=77% |
| 0.237508 | 0.772026 | 0.777778 | 0.944003 | 1 | 4319 tags=23%, list=18%, signal=28% |
| 0.287512 | 0.771741 | 0.790997 | 0.943668 | 1 | 4217 tags=36%, list=18%, signal=43% |
| 0.221505 | 0.771725 | 0.791946 | 0.942927 | 1 | 4766 tags=27%, list=20%, signal=34% |
| 0.338079 | 0.771367 | 0.722846 | 0.942694 | 1 | 5020 tags=34%, list=21%, signal=44% |
| 0.350561 | 0.77041  | 0.725379 | 0.943447 | 1 | 5020 tags=34%, list=21%, signal=43% |
| 0.249122 | 0.770209 | 0.862629 | 0.942989 | 1 | 2664 tags=20%, list=11%, signal=23% |
| 0.280924 | 0.77006  | 0.834671 | 0.94246  | 1 | 7324 tags=61%, list=31%, signal=89% |
| 0.249973 | 0.76937  | 0.696915 | 0.94276  | 1 | 5718 tags=36%, list=24%, signal=46% |
| 0.271913 | 0.768154 | 0.785032 | 0.943894 | 1 | 4514 tags=36%, list=19%, signal=45% |
| 0.308711 | 0.767477 | 0.78831  | 0.94419  | 1 | 3109 tags=34%, list=13%, signal=39% |
| 0.283628 | 0.76736  | 0.831547 | 0.943595 | 1 | 466 tags=11%, list=2%, signal=11%   |
| 0.276486 | 0.766383 | 0.572954 | 0.944268 | 1 | 2114 tags=21%, list=9%, signal=23%  |
| 0.309636 | 0.766085 | 0.696462 | 0.94393  | 1 | 4665 tags=44%, list=20%, signal=55% |
| 0.283683 | 0.76608  | 0.865478 | 0.943185 | 1 | 5533 tags=37%, list=24%, signal=48% |
| 0.296308 | 0.765532 | 0.849722 | 0.943286 | 1 | 2577 tags=25%, list=11%, signal=28% |
| 0.267847 | 0.765439 | 0.83913  | 0.942656 | 1 | 4478 tags=27%, list=19%, signal=33% |
| 0.318072 | 0.765233 | 0.766304 | 0.942192 | 1 | 7718 tags=43%, list=33%, signal=65% |
| 0.229595 | 0.764887 | 0.927497 | 0.94198  | 1 | 5768 tags=32%, list=25%, signal=42% |
| 0.301698 | 0.764041 | 0.795737 | 0.942498 | 1 | 4673 tags=40%, list=20%, signal=50% |
| 0.31153  | 0.763562 | 0.767176 | 0.942403 | 1 | 2470 tags=30%, list=11%, signal=34% |
| 0.23484  | 0.763502 | 0.871404 | 0.941746 | 1 | 2966 tags=19%, list=13%, signal=22% |
| 0.244707 | 0.762639 | 0.886115 | 0.942213 | 1 | 1984 tags=18%, list=8%, signal=20%  |
| 0.269943 | 0.762017 | 0.726957 | 0.94232  | 1 | 3125 tags=22%, list=13%, signal=26% |
| 0.21831  | 0.761421 | 0.973793 | 0.942425 | 1 | 4767 tags=28%, list=20%, signal=35% |
| 0.316865 | 0.761009 | 0.794682 | 0.942272 | 1 | 4847 tags=38%, list=21%, signal=47% |
| 0.326763 | 0.76081  | 0.737037 | 0.941805 | 1 | 5857 tags=59%, list=25%, signal=78% |
| 0.285693 | 0.760703 | 0.769912 | 0.94118  | 1 | 5133 tags=41%, list=22%, signal=53% |
| 0.251174 | 0.760398 | 0.850407 | 0.940884 | 1 | 4065 tags=26%, list=17%, signal=31% |
| 0.296545 | 0.759975 | 0.756055 | 0.940789 | 1 | 2662 tags=27%, list=11%, signal=30% |
| 0.321213 | 0.759355 | 0.713208 | 0.940901 | 1 | 3764 tags=35%, list=16%, signal=42% |
| 0.279827 | 0.75883  | 0.773124 | 0.940859 | 1 | 5595 tags=37%, list=24%, signal=49% |

|          |          |          |          |   |                                     |
|----------|----------|----------|----------|---|-------------------------------------|
| 0.288352 | 0.757162 | 0.789784 | 0.942405 | 1 | 3640 tags=25%, list=16%, signal=30% |
| 0.260097 | 0.756919 | 0.861429 | 0.941963 | 1 | 2594 tags=15%, list=11%, signal=17% |
| 0.30608  | 0.756258 | 0.723443 | 0.942093 | 1 | 3764 tags=35%, list=16%, signal=41% |
| 0.28683  | 0.755266 | 0.704331 | 0.942763 | 1 | 5468 tags=38%, list=23%, signal=49% |
| 0.276921 | 0.754113 | 0.756906 | 0.943516 | 1 | 2859 tags=23%, list=12%, signal=27% |
| 0.28459  | 0.75405  | 0.817658 | 0.94285  | 1 | 3535 tags=33%, list=15%, signal=39% |
| 0.214508 | 0.753677 | 0.917492 | 0.942571 | 1 | 4038 tags=22%, list=17%, signal=27% |
| 0.236989 | 0.753663 | 0.764706 | 0.941848 | 1 | 6117 tags=35%, list=26%, signal=48% |
| 0.363275 | 0.753349 | 0.742215 | 0.941568 | 1 | 5246 tags=53%, list=22%, signal=68% |
| 0.265293 | 0.752553 | 0.870827 | 0.941919 | 1 | 4683 tags=30%, list=20%, signal=37% |
| 0.262709 | 0.752028 | 0.887805 | 0.941845 | 1 | 4075 tags=22%, list=17%, signal=27% |
| 0.287656 | 0.751533 | 0.829528 | 0.941758 | 1 | 5379 tags=53%, list=23%, signal=69% |
| 0.266926 | 0.75146  | 0.874063 | 0.941107 | 1 | 3048 tags=23%, list=13%, signal=26% |
| 0.240422 | 0.750741 | 0.953125 | 0.94136  | 1 | 5315 tags=30%, list=23%, signal=39% |
| 0.24236  | 0.75061  | 0.821667 | 0.940776 | 1 | 3337 tags=22%, list=14%, signal=26% |
| 0.239646 | 0.750199 | 0.871017 | 0.940593 | 1 | 5584 tags=31%, list=24%, signal=41% |
| 0.315808 | 0.748235 | 0.768473 | 0.942438 | 1 | 2832 tags=20%, list=12%, signal=23% |
| 0.282167 | 0.747968 | 0.791209 | 0.942094 | 1 | 8091 tags=47%, list=35%, signal=71% |
| 0.230473 | 0.745574 | 0.910334 | 0.944554 | 1 | 3005 tags=19%, list=13%, signal=21% |
| 0.231133 | 0.745392 | 0.897674 | 0.94402  | 1 | 5910 tags=37%, list=25%, signal=49% |
| 0.285852 | 0.74535  | 0.731076 | 0.943351 | 1 | 6132 tags=43%, list=26%, signal=58% |
| 0.278812 | 0.744461 | 0.822161 | 0.943845 | 1 | 4108 tags=26%, list=18%, signal=32% |
| 0.212148 | 0.744186 | 0.938211 | 0.94349  | 1 | 6164 tags=36%, list=26%, signal=48% |
| 0.285841 | 0.744011 | 0.824773 | 0.942971 | 1 | 6304 tags=33%, list=27%, signal=46% |
| 0.266644 | 0.7429   | 0.889695 | 0.943545 | 1 | 7335 tags=53%, list=31%, signal=77% |
| 0.307207 | 0.742548 | 0.733962 | 0.943248 | 1 | 3764 tags=36%, list=16%, signal=42% |
| 0.209422 | 0.741903 | 0.947458 | 0.94333  | 1 | 6416 tags=35%, list=27%, signal=48% |
| 0.257927 | 0.741767 | 0.85913  | 0.942738 | 1 | 3355 tags=23%, list=14%, signal=27% |
| 0.218701 | 0.74124  | 0.9      | 0.942587 | 1 | 6670 tags=38%, list=28%, signal=53% |
| 0.216649 | 0.741071 | 0.934426 | 0.942048 | 1 | 5595 tags=26%, list=24%, signal=34% |
| 0.227509 | 0.740351 | 0.889923 | 0.9422   | 1 | 5234 tags=32%, list=22%, signal=41% |
| 0.229915 | 0.739886 | 0.790441 | 0.941997 | 1 | 5361 tags=33%, list=23%, signal=43% |
| 0.314243 | 0.739818 | 0.852649 | 0.941351 | 1 | 8403 tags=41%, list=36%, signal=64% |
| 0.301212 | 0.739665 | 0.768382 | 0.940814 | 1 | 2654 tags=26%, list=11%, signal=29% |
| 0.316574 | 0.738421 | 0.738095 | 0.941562 | 1 | 4345 tags=39%, list=19%, signal=48% |
| 0.282764 | 0.738014 | 0.70674  | 0.941306 | 1 | 5777 tags=44%, list=25%, signal=58% |
| 0.219044 | 0.737278 | 0.870432 | 0.941541 | 1 | 5859 tags=32%, list=25%, signal=42% |
| 0.272555 | 0.735735 | 0.853333 | 0.94279  | 1 | 6866 tags=35%, list=29%, signal=50% |
| 0.263726 | 0.733524 | 0.820809 | 0.944633 | 1 | 5715 tags=36%, list=24%, signal=48% |
| 0.305218 | 0.733079 | 0.755459 | 0.944441 | 1 | 4958 tags=33%, list=21%, signal=42% |
| 0.25343  | 0.732071 | 0.876068 | 0.944933 | 1 | 7759 tags=46%, list=33%, signal=68% |
| 0.29387  | 0.731667 | 0.801105 | 0.944663 | 1 | 1855 tags=17%, list=8%, signal=19%  |
| 0.338645 | 0.730788 | 0.723776 | 0.944997 | 1 | 7082 tags=53%, list=30%, signal=76% |
| 0.306738 | 0.730125 | 0.728782 | 0.945094 | 1 | 4802 tags=40%, list=21%, signal=50% |
| 0.27246  | 0.729556 | 0.8646   | 0.945005 | 1 | 3220 tags=23%, list=14%, signal=27% |
| 0.22329  | 0.728903 | 0.841818 | 0.945054 | 1 | 5547 tags=34%, list=24%, signal=44% |
| 0.265397 | 0.726022 | 0.927808 | 0.947726 | 1 | 5593 tags=38%, list=24%, signal=49% |
| 0.23269  | 0.725617 | 0.926563 | 0.947452 | 1 | 1442 tags=16%, list=6%, signal=17%  |
| 0.334555 | 0.725523 | 0.850556 | 0.946819 | 1 | 6983 tags=40%, list=30%, signal=57% |
| 0.285915 | 0.725335 | 0.776062 | 0.946279 | 1 | 5869 tags=48%, list=25%, signal=64% |

|          |          |          |          |   |                                     |
|----------|----------|----------|----------|---|-------------------------------------|
| 0.299316 | 0.72432  | 0.822464 | 0.946757 | 1 | 8091 tags=59%, list=35%, signal=90% |
| 0.312752 | 0.723953 | 0.833055 | 0.946446 | 1 | 1542 tags=20%, list=7%, signal=21%  |
| 0.211457 | 0.723518 | 0.926761 | 0.946292 | 1 | 4534 tags=28%, list=19%, signal=34% |
| 0.255761 | 0.723003 | 0.929217 | 0.946134 | 1 | 5203 tags=33%, list=22%, signal=43% |
| 0.284367 | 0.722958 | 0.855446 | 0.945447 | 1 | 3737 tags=32%, list=16%, signal=38% |
| 0.278767 | 0.721888 | 0.831826 | 0.945966 | 1 | 6336 tags=41%, list=27%, signal=56% |
| 0.220639 | 0.721735 | 0.825704 | 0.945405 | 1 | 5910 tags=35%, list=25%, signal=46% |
| 0.277144 | 0.721115 | 0.867669 | 0.945315 | 1 | 5922 tags=48%, list=25%, signal=64% |
| 0.249477 | 0.719436 | 0.838583 | 0.946406 | 1 | 4347 tags=25%, list=19%, signal=31% |
| 0.296347 | 0.719042 | 0.795411 | 0.946139 | 1 | 3764 tags=33%, list=16%, signal=39% |
| 0.234802 | 0.718859 | 0.865835 | 0.945613 | 1 | 4672 tags=29%, list=20%, signal=36% |
| 0.324252 | 0.718642 | 0.9046   | 0.945149 | 1 | 6336 tags=47%, list=27%, signal=64% |
| 0.293967 | 0.718263 | 0.749042 | 0.944847 | 1 | 3764 tags=27%, list=16%, signal=32% |
| 0.285191 | 0.718051 | 0.827709 | 0.944414 | 1 | 6094 tags=36%, list=26%, signal=49% |
| 0.274209 | 0.717877 | 0.867508 | 0.943902 | 1 | 7965 tags=60%, list=34%, signal=91% |
| 0.334564 | 0.717368 | 0.83     | 0.943761 | 1 | 5847 tags=63%, list=25%, signal=84% |
| 0.263126 | 0.715928 | 0.821218 | 0.944727 | 1 | 3897 tags=25%, list=17%, signal=30% |
| 0.248477 | 0.715213 | 0.906143 | 0.944859 | 1 | 4190 tags=30%, list=18%, signal=37% |
| 0.219524 | 0.711375 | 0.935024 | 0.948007 | 1 | 6381 tags=38%, list=27%, signal=53% |
| 0.29447  | 0.709771 | 0.776557 | 0.948935 | 1 | 3764 tags=33%, list=16%, signal=40% |
| 0.262598 | 0.707918 | 0.687037 | 0.950063 | 1 | 5834 tags=39%, list=25%, signal=51% |
| 0.225552 | 0.705613 | 0.923211 | 0.951683 | 1 | 5911 tags=33%, list=25%, signal=44% |
| 0.257963 | 0.705182 | 0.875385 | 0.951414 | 1 | 4929 tags=44%, list=21%, signal=55% |
| 0.261966 | 0.703682 | 0.928685 | 0.952158 | 1 | 5131 tags=33%, list=22%, signal=43% |
| 0.247848 | 0.703265 | 0.844794 | 0.951826 | 1 | 5857 tags=43%, list=25%, signal=57% |
| 0.25064  | 0.70276  | 0.881557 | 0.951606 | 1 | 4352 tags=26%, list=19%, signal=32% |
| 0.213015 | 0.701553 | 0.973134 | 0.952099 | 1 | 5671 tags=33%, list=24%, signal=43% |
| 0.281876 | 0.701298 | 0.889621 | 0.951637 | 1 | 4008 tags=30%, list=17%, signal=36% |
| 0.23239  | 0.701254 | 0.954167 | 0.950965 | 1 | 4217 tags=28%, list=18%, signal=34% |
| 0.220569 | 0.699323 | 0.813528 | 0.952083 | 1 | 5760 tags=32%, list=25%, signal=42% |
| 0.243889 | 0.699045 | 0.881024 | 0.951637 | 1 | 6316 tags=42%, list=27%, signal=58% |
| 0.220526 | 0.69806  | 0.88547  | 0.951895 | 1 | 3560 tags=25%, list=15%, signal=29% |
| 0.259852 | 0.694647 | 0.896552 | 0.954466 | 1 | 1948 tags=19%, list=8%, signal=20%  |
| 0.258527 | 0.6946   | 0.763986 | 0.953799 | 1 | 8033 tags=58%, list=34%, signal=89% |
| 0.274698 | 0.694574 | 0.854938 | 0.953108 | 1 | 6304 tags=40%, list=27%, signal=54% |
| 0.318688 | 0.694215 | 0.769674 | 0.952735 | 1 | 5020 tags=31%, list=21%, signal=40% |
| 0.269958 | 0.692371 | 0.826241 | 0.953725 | 1 | 4145 tags=35%, list=18%, signal=42% |
| 0.286484 | 0.691538 | 0.863139 | 0.953735 | 1 | 3632 tags=27%, list=16%, signal=32% |
| 0.247719 | 0.691518 | 0.880783 | 0.953053 | 1 | 3871 tags=22%, list=17%, signal=27% |
| 0.251356 | 0.688287 | 0.913997 | 0.955275 | 1 | 5787 tags=38%, list=25%, signal=51% |
| 0.269189 | 0.688149 | 0.950213 | 0.954707 | 1 | 5379 tags=35%, list=23%, signal=45% |
| 0.279914 | 0.688022 | 0.858716 | 0.954121 | 1 | 7107 tags=50%, list=30%, signal=72% |
| 0.200507 | 0.687552 | 0.960227 | 0.953819 | 1 | 7206 tags=43%, list=31%, signal=62% |
| 0.26486  | 0.687534 | 0.856867 | 0.953117 | 1 | 3368 tags=25%, list=14%, signal=29% |
| 0.218262 | 0.687395 | 0.980029 | 0.952541 | 1 | 6761 tags=35%, list=29%, signal=49% |
| 0.239242 | 0.685455 | 0.890388 | 0.95361  | 1 | 2470 tags=20%, list=11%, signal=22% |
| 0.28893  | 0.68338  | 0.854962 | 0.954635 | 1 | 6440 tags=41%, list=28%, signal=57% |
| 0.291366 | 0.681201 | 0.817308 | 0.955886 | 1 | 4802 tags=39%, list=21%, signal=49% |
| 0.31204  | 0.676244 | 0.843985 | 0.959204 | 1 | 6273 tags=44%, list=27%, signal=61% |
| 0.28007  | 0.675879 | 0.813264 | 0.958837 | 1 | 4959 tags=39%, list=21%, signal=49% |

|          |          |          |          |   |                                     |
|----------|----------|----------|----------|---|-------------------------------------|
| 0.24457  | 0.674935 | 0.838889 | 0.958927 | 1 | 4532 tags=31%, list=19%, signal=38% |
| 0.197209 | 0.670271 | 0.970968 | 0.96184  | 1 | 5537 tags=21%, list=24%, signal=28% |
| 0.221841 | 0.669228 | 0.89781  | 0.961874 | 1 | 3897 tags=23%, list=17%, signal=28% |
| 0.285109 | 0.667501 | 0.898551 | 0.96244  | 1 | 6960 tags=38%, list=30%, signal=54% |
| 0.317746 | 0.666361 | 0.845238 | 0.962637 | 1 | 5847 tags=55%, list=25%, signal=72% |
| 0.302996 | 0.665577 | 0.849315 | 0.962472 | 1 | 5869 tags=59%, list=25%, signal=78% |
| 0.262728 | 0.662065 | 0.893155 | 0.964385 | 1 | 3481 tags=29%, list=15%, signal=35% |
| 0.253739 | 0.65598  | 0.871143 | 0.967835 | 1 | 4959 tags=34%, list=21%, signal=43% |
| 0.217174 | 0.655955 | 0.983146 | 0.967144 | 1 | 7461 tags=46%, list=32%, signal=68% |
| 0.309891 | 0.654958 | 0.806273 | 0.967076 | 1 | 2033 tags=27%, list=9%, signal=30%  |
| 0.245123 | 0.654366 | 0.894928 | 0.966794 | 1 | 7116 tags=39%, list=30%, signal=56% |
| 0.285609 | 0.652619 | 0.777989 | 0.967231 | 1 | 5516 tags=38%, list=24%, signal=49% |
| 0.327498 | 0.652534 | 0.839458 | 0.966578 | 1 | 4755 tags=42%, list=20%, signal=53% |
| 0.283991 | 0.650749 | 0.824299 | 0.967106 | 1 | 4603 tags=25%, list=20%, signal=31% |
| 0.231535 | 0.649568 | 0.954041 | 0.96712  | 1 | 2902 tags=21%, list=12%, signal=23% |
| 0.297532 | 0.648073 | 0.770093 | 0.967386 | 1 | 7205 tags=58%, list=31%, signal=84% |
| 0.26754  | 0.640017 | 0.744059 | 0.971625 | 1 | 8089 tags=61%, list=35%, signal=93% |
| 0.24133  | 0.639389 | 0.940154 | 0.97131  | 1 | 5501 tags=38%, list=23%, signal=49% |
| 0.208087 | 0.638152 | 0.985185 | 0.971317 | 1 | 6808 tags=42%, list=29%, signal=59% |
| 0.261541 | 0.629276 | 0.849057 | 0.975621 | 1 | 8050 tags=55%, list=34%, signal=84% |
| 0.239583 | 0.628051 | 0.932526 | 0.975586 | 1 | 7984 tags=56%, list=34%, signal=85% |
| 0.212495 | 0.627006 | 0.961268 | 0.975462 | 1 | 8413 tags=51%, list=36%, signal=80% |
| 0.243294 | 0.62334  | 0.955385 | 0.976711 | 1 | 7372 tags=51%, list=31%, signal=74% |
| 0.252554 | 0.623    | 0.954466 | 0.976173 | 1 | 8692 tags=47%, list=37%, signal=75% |
| 0.267767 | 0.622642 | 0.874396 | 0.975662 | 1 | 6053 tags=38%, list=26%, signal=51% |
| 0.249957 | 0.618873 | 0.880309 | 0.976808 | 1 | 3435 tags=23%, list=15%, signal=27% |
| 0.223936 | 0.618686 | 0.950368 | 0.976169 | 1 | 6612 tags=32%, list=28%, signal=45% |
| 0.186    | 0.616864 | 0.963855 | 0.976346 | 1 | 5620 tags=22%, list=24%, signal=29% |
| 0.258347 | 0.616837 | 0.884393 | 0.975648 | 1 | 5861 tags=39%, list=25%, signal=52% |
| 0.232968 | 0.616501 | 0.83054  | 0.975106 | 1 | 5745 tags=36%, list=25%, signal=48% |
| 0.309521 | 0.612859 | 0.794495 | 0.976068 | 1 | 8050 tags=61%, list=34%, signal=92% |
| 0.256746 | 0.611423 | 0.878613 | 0.975978 | 1 | 5752 tags=38%, list=25%, signal=51% |
| 0.204515 | 0.61017  | 0.983283 | 0.975866 | 1 | 5389 tags=27%, list=23%, signal=35% |
| 0.224691 | 0.610042 | 0.967407 | 0.975219 | 1 | 6876 tags=42%, list=29%, signal=59% |
| 0.238099 | 0.607946 | 0.960568 | 0.975405 | 1 | 6537 tags=32%, list=28%, signal=44% |
| 0.20293  | 0.601727 | 0.850746 | 0.977338 | 1 | 5601 tags=32%, list=24%, signal=42% |
| 0.230992 | 0.601306 | 0.863884 | 0.976811 | 1 | 6004 tags=40%, list=26%, signal=54% |
| 0.233452 | 0.596636 | 0.858238 | 0.977901 | 1 | 5880 tags=36%, list=25%, signal=48% |
| 0.285607 | 0.590302 | 0.842294 | 0.97965  | 1 | 3825 tags=35%, list=16%, signal=42% |
| 0.231717 | 0.588781 | 0.969871 | 0.979457 | 1 | 7343 tags=53%, list=31%, signal=77% |
| 0.248543 | 0.583106 | 0.8625   | 0.980669 | 1 | 7269 tags=55%, list=31%, signal=79% |
| 0.211245 | 0.570882 | 0.89942  | 0.983594 | 1 | 4347 tags=21%, list=19%, signal=26% |
| 0.270914 | 0.569559 | 0.927644 | 0.983266 | 1 | 4926 tags=40%, list=21%, signal=51% |
| 0.232894 | 0.564349 | 0.961938 | 0.983973 | 1 | 4888 tags=19%, list=21%, signal=24% |
| 0.192931 | 0.526211 | 0.928972 | 0.991542 | 1 | 4347 tags=19%, list=19%, signal=24% |
| 0.289345 | 0.513048 | 0.899054 | 0.99288  | 1 | 7933 tags=43%, list=34%, signal=66% |
| 0.200692 | 0.511421 | 0.95946  | 0.992394 | 1 | 8367 tags=55%, list=36%, signal=86% |
| 0.180616 | 0.413967 | 0.984375 | 0.999549 | 1 | 7858 tags=44%, list=34%, signal=67% |
| 0.17699  | 0.409574 | 0.99361  | 0.998987 | 1 | 9322 tags=42%, list=40%, signal=69% |
| 0.179512 | 0.403636 | 0.992308 | 0.998444 | 1 | 7858 tags=43%, list=34%, signal=64% |
