# Supplementary material for: Mutant p53-dependent mitochondrial metabolic alterations in a mesenchymal stem cell-based model of progressive malignancy
Source: PubMed Central journal article supplement (PMC6748146; doi:10.1038/s41418-018-0227-z), 2018-11-09
Supplement: 41418_2018_227_MOESM4_ESM.pdf [file 41418_2018_227_MOESM4_ESM.pdf]

|                      |                                                                  |
|----------------------|------------------------------------------------------------------|
| Annotation Cluster 1 | Enrichment Score: 13.195268597156016                             |
| Category             | Term                                                             |
| GOTERM_BP_DIRECT     | GO:0009615~response to virus                                     |
| GOTERM_BP_DIRECT     | GO:0051607~defense response to virus                             |
| UP_KEYWORDS          | Innate immunity                                                  |
| UP_KEYWORDS          | Antiviral defense                                                |
| UP_KEYWORDS          | Immunity                                                         |
| GOTERM_BP_DIRECT     | GO:0002376~immune system process                                 |
| GOTERM_BP_DIRECT     | GO:0045071~negative regulation of viral genome replication       |
| GOTERM_BP_DIRECT     | GO:0045087~innate immune response                                |
| <br>                 |                                                                  |
| Annotation Cluster 2 | Enrichment Score: 6.807379517382686                              |
| Category             | Term                                                             |
| UP_KEYWORDS          | Metal-binding                                                    |
| UP_KEYWORDS          | Zinc                                                             |
| UP_KEYWORDS          | Zinc-finger                                                      |
| GOTERM_MF_DIRECT     | GO:0046872~metal ion binding                                     |
| <br>                 |                                                                  |
| Annotation Cluster 3 | Enrichment Score: 5.371404391824246                              |
| Category             | Term                                                             |
| GOTERM_MF_DIRECT     | GO:0001730~2'-5'-oligoadenylate synthetase activity              |
| GOTERM_MF_DIRECT     | GO:0003725~double-stranded RNA binding                           |
| INTERPRO             | IPR026774:2'-5'-oligoadenylate synthase                          |
| INTERPRO             | IPR018952:2'-5'-oligoadenylate synthetase 1, domain 2/C-terminal |
| INTERPRO             | IPR006117:2-5-oligoadenylate synthetase, conserved site          |
| INTERPRO             | IPR006116:2-5-oligoadenylate synthetase, N-terminal              |
| INTERPRO             | IPR002934:Nucleotidyl transferase domain                         |
| GOTERM_BP_DIRECT     | GO:0006164~purine nucleotide biosynthetic process                |
| GOTERM_MF_DIRECT     | GO:0016779~nucleotidyltransferase activity                       |
| UP_KEYWORDS          | Nucleotidyltransferase                                           |
| GOTERM_BP_DIRECT     | GO:0006955~immune response                                       |
| <br>                 |                                                                  |
| Annotation Cluster 4 | Enrichment Score: 5.077378188146548                              |
| Category             | Term                                                             |
| GOTERM_BP_DIRECT     | GO:0035458~cellular response to interferon-beta                  |
| INTERPRO             | IPR007743:Interferon-inducible GTPase                            |
| GOTERM_MF_DIRECT     | GO:0003924~GTPase activity                                       |
| GOTERM_BP_DIRECT     | GO:0006952~defense response                                      |
| <br>                 |                                                                  |
| Annotation Cluster 5 | Enrichment Score: 5.066681884158618                              |
| Category             | Term                                                             |
| KEGG_PATHWAY         | mmu05168:Herpes simplex infection                                |
| KEGG_PATHWAY         | mmu05162:Measles                                                 |
| KEGG_PATHWAY         | mmu05164:Influenza A                                             |
| KEGG_PATHWAY         | mmu05160:Hepatitis C                                             |
| <br>                 |                                                                  |
| Annotation Cluster 6 | Enrichment Score: 4.211708958414278                              |
| Category             | Term                                                             |
| UP_KEYWORDS          | Mitochondrion                                                    |
| UP_KEYWORDS          | Transit peptide                                                  |

|                       |                                                                          |
|-----------------------|--------------------------------------------------------------------------|
| UP_SEQ_FEATURE        | transit peptide:Mitochondrion                                            |
| Annotation Cluster 7  | Enrichment Score: 3.4710239293625436                                     |
| Category              | Term                                                                     |
| UP_KEYWORDS           | Nucleus                                                                  |
| UP_KEYWORDS           | Transcription                                                            |
| UP_KEYWORDS           | Transcription regulation                                                 |
| GOTERM_BP_DIRECT      | GO:0006351~transcription, DNA-templated                                  |
| GOTERM_MF_DIRECT      | GO:0003700~transcription factor activity, sequence-specific DNA binding  |
| UP_KEYWORDS           | DNA-binding                                                              |
| GOTERM_MF_DIRECT      | GO:0003677~DNA binding                                                   |
| GOTERM_BP_DIRECT      | GO:0006355~regulation of transcription, DNA-templated                    |
| Annotation Cluster 8  | Enrichment Score: 3.2779195928201856                                     |
| Category              | Term                                                                     |
| INTERPRO              | IPR027417:P-loop containing nucleoside triphosphate hydrolase            |
| GOTERM_MF_DIRECT      | GO:0005525~GTP binding                                                   |
| UP_KEYWORDS           | GTP-binding                                                              |
| GOTERM_MF_DIRECT      | GO:0003924~GTPase activity                                               |
| UP_SEQ_FEATURE        | nucleotide phosphate-binding region:GTP                                  |
| Annotation Cluster 9  | Enrichment Score: 2.5156353407135286                                     |
| Category              | Term                                                                     |
| UP_KEYWORDS           | Aminoacyl-tRNA synthetase                                                |
| GOTERM_MF_DIRECT      | GO:0004812~aminoacyl-tRNA ligase activity                                |
| GOTERM_BP_DIRECT      | GO:0006418~tRNA aminoacylation for protein translation                   |
| KEGG_PATHWAY          | mmu00970:Aminoacyl-tRNA biosynthesis                                     |
| UP_KEYWORDS           | Ligase                                                                   |
| UP_SEQ_FEATURE        | short sequence motif:"HIGH" region                                       |
| UP_KEYWORDS           | Protein biosynthesis                                                     |
| INTERPRO              | IPR014729:Rossmann-like alpha/beta/alpha sandwich fold                   |
| GOTERM_MF_DIRECT      | GO:0016874~ligase activity                                               |
| INTERPRO              | IPR001412:Aminoacyl-tRNA synthetase, class I, conserved site             |
| UP_SEQ_FEATURE        | short sequence motif:"KMSKS" region                                      |
| INTERPRO              | IPR006195:Aminoacyl-tRNA synthetase, class II                            |
| INTERPRO              | IPR002314:Aminoacyl-tRNA synthetase, class II (G/ H/ P/ S), conserved do |
| GOTERM_BP_DIRECT      | GO:0006412~translation                                                   |
| INTERPRO              | IPR009080:Aminoacyl-tRNA synthetase, class 1a, anticodon-binding         |
| Annotation Cluster 10 | Enrichment Score: 2.5042715396802553                                     |
| Category              | Term                                                                     |
| INTERPRO              | IPR012317:Poly(ADP-ribose) polymerase, catalytic domain                  |
| UP_SEQ_FEATURE        | domain:PARP catalytic                                                    |
| INTERPRO              | IPR004170:WWE domain                                                     |
| GOTERM_MF_DIRECT      | GO:0003950~NAD+ ADP-ribosyltransferase activity                          |
| UP_SEQ_FEATURE        | domain:WWE                                                               |
| UP_KEYWORDS           | NAD                                                                      |
| INTERPRO              | IPR000571:Zinc finger, CCCH-type                                         |
| Annotation Cluster 11 | Enrichment Score: 2.2128357554985434                                     |

|                       |                                                                                 |
|-----------------------|---------------------------------------------------------------------------------|
| Category              | Term                                                                            |
| UP_KEYWORDS           | Endoplasmic reticulum                                                           |
| GOTERM_CC_DIRECT      | GO:0005783~endoplasmic reticulum                                                |
| GOTERM_CC_DIRECT      | GO:0005789~endoplasmic reticulum membrane                                       |
| Annotation Cluster 12 | Enrichment Score: 2.0628407504549475                                            |
| Category              | Term                                                                            |
| GOTERM_MF_DIRECT      | GO:0000975~regulatory region DNA binding                                        |
| INTERPRO              | IPR019817:Interferon regulatory factor, conserved site                          |
| INTERPRO              | IPR001346:Interferon regulatory factor DNA-binding domain                       |
| SMART                 | SM00348:IRF                                                                     |
| UP_SEQ_FEATURE        | DNA-binding region:Tryptophan pentad repeat                                     |
| INTERPRO              | IPR017855:SMAD domain-like                                                      |
| INTERPRO              | IPR019471:Interferon regulatory factor-3                                        |
| SMART                 | SM01243:SM01243                                                                 |
| INTERPRO              | IPR008984:SMAD/FHA domain                                                       |
| INTERPRO              | IPR011991:Winged helix-turn-helix DNA-binding domain                            |
| Annotation Cluster 13 | Enrichment Score: 2.0382869832033905                                            |
| Category              | Term                                                                            |
| INTERPRO              | IPR013083:Zinc finger, RING/FYVE/PHD-type                                       |
| SMART                 | SM00184:RING                                                                    |
| INTERPRO              | IPR001841:Zinc finger, RING-type                                                |
| INTERPRO              | IPR017907:Zinc finger, RING-type, conserved site                                |
| UP_SEQ_FEATURE        | zinc finger region:RING-type                                                    |
| Annotation Cluster 14 | Enrichment Score: 1.7737746492511772                                            |
| Category              | Term                                                                            |
| GOTERM_BP_DIRECT      | GO:0045893~positive regulation of transcription, DNA-templated                  |
| GOTERM_BP_DIRECT      | GO:0045944~positive regulation of transcription from RNA polymerase II promoter |
| GOTERM_MF_DIRECT      | GO:0003700~transcription factor activity, sequence-specific DNA binding         |
| UP_KEYWORDS           | Activator                                                                       |
| GOTERM_MF_DIRECT      | GO:0043565~sequence-specific DNA binding                                        |
| Annotation Cluster 15 | Enrichment Score: 1.7256241838300834                                            |
| Category              | Term                                                                            |
| GOTERM_CC_DIRECT      | GO:0020005~symbiont-containing vacuole membrane                                 |
| INTERPRO              | IPR003191:Guanylate-binding protein, C-terminal                                 |
| GOTERM_BP_DIRECT      | GO:0071346~cellular response to interferon-gamma                                |
| INTERPRO              | IPR015894:Guanylate-binding protein, N-terminal                                 |
| GOTERM_BP_DIRECT      | GO:0042832~defense response to protozoan                                        |
| GOTERM_BP_DIRECT      | GO:0044406~adhesion of symbiont to host                                         |
| GOTERM_BP_DIRECT      | GO:0050830~defense response to Gram-positive bacterium                          |
| Annotation Cluster 16 | Enrichment Score: 1.7076575626640753                                            |
| Category              | Term                                                                            |
| UP_KEYWORDS           | Nucleotide-binding                                                              |
| UP_KEYWORDS           | Transferase                                                                     |
| UP_KEYWORDS           | ATP-binding                                                                     |
| GOTERM_MF_DIRECT      | GO:0016740~transferase activity                                                 |

GOTERM\_MF\_DIRECT GO:0005524~ATP binding  
 GOTERM\_MF\_DIRECT GO:0000166~nucleotide binding  
 GOTERM\_BP\_DIRECT GO:0046777~protein autophosphorylation  
 UP\_SEQ\_FEATURE active site:Proton acceptor  
 UP\_KEYWORDS Kinase  
 UP\_SEQ\_FEATURE nucleotide phosphate-binding region:ATP  
 GOTERM\_MF\_DIRECT GO:0004672~protein kinase activity  
 GOTERM\_BP\_DIRECT GO:0016310~phosphorylation  
 GOTERM\_BP\_DIRECT GO:0006468~protein phosphorylation  
 INTERPRO IPR000719:Protein kinase, catalytic domain  
 GOTERM\_MF\_DIRECT GO:0016301~kinase activity  
 UP\_SEQ\_FEATURE domain:Protein kinase  
 UP\_SEQ\_FEATURE binding site:ATP  
 INTERPRO IPR011009:Protein kinase-like domain  
 INTERPRO IPR017441:Protein kinase, ATP binding site  
 UP\_KEYWORDS Serine/threonine-protein kinase  
 GOTERM\_MF\_DIRECT GO:0004674~protein serine/threonine kinase activity  
 SMART SM00220:S\_TKc  
 INTERPRO IPR008271:Serine/threonine-protein kinase, active site

Annotation Cluster 17 Enrichment Score: 1.664983051613404  
 Category Term  
 INTERPRO IPR003130:Dynamin GTPase effector  
 INTERPRO IPR000375:Dynamin central domain  
 INTERPRO IPR019762:Dynamin, GTPase region, conserved site  
 SMART SM00302:GED  
 UP\_SEQ\_FEATURE domain:GED  
 INTERPRO IPR020850:GTPase effector domain, GED  
 INTERPRO IPR001401:Dynamin, GTPase domain  
 SMART SM00053:DYNc  
 INTERPRO IPR022812:Dynamin

Annotation Cluster 18 Enrichment Score: 1.5845680420567625  
 Category Term  
 UP\_KEYWORDS Endosome  
 GOTERM\_CC\_DIRECT GO:0005768~endosome  
 GOTERM\_CC\_DIRECT GO:0005769~early endosome

Annotation Cluster 19 Enrichment Score: 1.4840630619713144  
 Category Term  
 UP\_SEQ\_FEATURE domain:SAND  
 INTERPRO IPR000770:SAND domain  
 SMART SM00258:SAND  
 INTERPRO IPR010919:SAND domain-like

Annotation Cluster 20 Enrichment Score: 1.4627125679080828  
 Category Term  
 INTERPRO IPR016192:APOBEC/CMP deaminase, zinc-binding  
 INTERPRO IPR016193:Cytidine deaminase-like  
 INTERPRO IPR002125:CMP/dCMP deaminase, zinc-binding

|                       |                                                              |
|-----------------------|--------------------------------------------------------------|
| Annotation Cluster 21 | Enrichment Score: 1.4090319959943285                         |
| Category              | Term                                                         |
| UP_SEQ_FEATURE        | zinc finger region:C2H2-type 2                               |
| UP_SEQ_FEATURE        | zinc finger region:C2H2-type 1                               |
| UP_SEQ_FEATURE        | zinc finger region:C2H2-type 3                               |
| INTERPRO              | IPR015880:Zinc finger, C2H2-like                             |
| SMART                 | SM00355:ZnF_C2H2                                             |
| INTERPRO              | IPR007087:Zinc finger, C2H2                                  |
| UP_SEQ_FEATURE        | zinc finger region:C2H2-type 5                               |
| INTERPRO              | IPR013087:Zinc finger C2H2-type/integrase DNA-binding domain |
| UP_SEQ_FEATURE        | zinc finger region:C2H2-type 4                               |
| UP_SEQ_FEATURE        | zinc finger region:C2H2-type 7                               |
| UP_SEQ_FEATURE        | zinc finger region:C2H2-type 6                               |
| GOTERM_MF_DIRECT      | GO:0003676~nucleic acid binding                              |
| <br>                  |                                                              |
| Annotation Cluster 22 | Enrichment Score: 1.3879374767230954                         |
| Category              | Term                                                         |
| GOTERM_CC_DIRECT      | GO:0016023~cytoplasmic, membrane-bounded vesicle             |
| GOTERM_CC_DIRECT      | GO:0031410~cytoplasmic vesicle                               |
| UP_KEYWORDS           | Cytoplasmic vesicle                                          |
| <br>                  |                                                              |
| Annotation Cluster 23 | Enrichment Score: 1.3678025249626984                         |
| Category              | Term                                                         |
| UP_KEYWORDS           | Protein transport                                            |
| UP_KEYWORDS           | Transport                                                    |
| GOTERM_BP_DIRECT      | GO:0015031~protein transport                                 |
| GOTERM_BP_DIRECT      | GO:0006810~transport                                         |
| <br>                  |                                                              |
| Annotation Cluster 24 | Enrichment Score: 1.321341282743224                          |
| Category              | Term                                                         |
| INTERPRO              | IPR021673:C-terminal domain of RIG-I                         |
| UP_KEYWORDS           | Helicase                                                     |
| KEGG_PATHWAY          | mmu04622:RIG-I-like receptor signaling pathway               |
| GOTERM_MF_DIRECT      | GO:0004386~helicase activity                                 |
| INTERPRO              | IPR006935:Helicase/UvrB domain                               |
| SMART                 | SM00490:HELICc                                               |
| INTERPRO              | IPR001650:Helicase, C-terminal                               |
| INTERPRO              | IPR014001:Helicase, superfamily 1/2, ATP-binding domain      |
| SMART                 | SM00487:DEXDc                                                |
| UP_SEQ_FEATURE        | domain:Helicase ATP-binding                                  |
| GOTERM_MF_DIRECT      | GO:0016817~hydrolase activity, acting on acid anhydrides     |
| GOTERM_MF_DIRECT      | GO:0003727~single-stranded RNA binding                       |
| GOTERM_MF_DIRECT      | GO:0008026~ATP-dependent helicase activity                   |
| INTERPRO              | IPR011545:DNA/RNA helicase, DEAD/DEAH box type, N-terminal   |
| UP_SEQ_FEATURE        | short sequence motif:DEAH box                                |
| UP_SEQ_FEATURE        | domain:Helicase C-terminal                                   |
| COG_ONTOLOGY          | DNA replication, recombination, and repair                   |
| GOTERM_MF_DIRECT      | GO:0004004~ATP-dependent RNA helicase activity               |

|                       |                                                                 |
|-----------------------|-----------------------------------------------------------------|
| Annotation Cluster 25 | Enrichment Score: 1.2070452742902662                            |
| Category              | Term                                                            |
| INTERPRO              | IPR011021:Arrestin-like, N-terminal                             |
| INTERPRO              | IPR011022:Arrestin C-terminal-like domain                       |
| SMART                 | SM01017:SM01017                                                 |
| INTERPRO              | IPR014756:Immunoglobulin E-set                                  |
| Annotation Cluster 26 | Enrichment Score: 1.1523106838753976                            |
| Category              | Term                                                            |
| UP_KEYWORDS           | Lipid degradation                                               |
| KEGG_PATHWAY          | mmu00565:Ether lipid metabolism                                 |
| GOTERM_BP_DIRECT      | GO:0016042~lipid catabolic process                              |
| Annotation Cluster 27 | Enrichment Score: 1.1414124530916265                            |
| Category              | Term                                                            |
| GOTERM_BP_DIRECT      | GO:0050679~positive regulation of epithelial cell proliferation |
| GOTERM_BP_DIRECT      | GO:0042733~embryonic digit morphogenesis                        |
| GOTERM_BP_DIRECT      | GO:0035115~embryonic forelimb morphogenesis                     |
| GOTERM_BP_DIRECT      | GO:0042476~odontogenesis                                        |
| GOTERM_BP_DIRECT      | GO:0060021~palate development                                   |
| GOTERM_BP_DIRECT      | GO:0035116~embryonic hindlimb morphogenesis                     |
| Annotation Cluster 28 | Enrichment Score: 1.131731001752202                             |
| Category              | Term                                                            |
| INTERPRO              | IPR013026:Tetratricopeptide repeat-containing domain            |
| SMART                 | SM00028:TPR                                                     |
| INTERPRO              | IPR019734:Tetratricopeptide repeat                              |
| UP_SEQ_FEATURE        | repeat:TPR 4                                                    |
| UP_SEQ_FEATURE        | repeat:TPR 3                                                    |
| UP_KEYWORDS           | TPR repeat                                                      |
| UP_SEQ_FEATURE        | repeat:TPR 2                                                    |
| UP_SEQ_FEATURE        | repeat:TPR 1                                                    |
| INTERPRO              | IPR011990:Tetratricopeptide-like helical                        |
| UP_SEQ_FEATURE        | repeat:TPR 5                                                    |
| UP_SEQ_FEATURE        | repeat:TPR 7                                                    |
| UP_SEQ_FEATURE        | repeat:TPR 6                                                    |
| UP_SEQ_FEATURE        | repeat:TPR 8                                                    |
| Annotation Cluster 29 | Enrichment Score: 1.1204498550026982                            |
| Category              | Term                                                            |
| GOTERM_BP_DIRECT      | GO:0042157~lipoprotein metabolic process                        |
| INTERPRO              | IPR008405:Apolipoprotein L                                      |
| GOTERM_BP_DIRECT      | GO:0006869~lipid transport                                      |
| Annotation Cluster 30 | Enrichment Score: 1.0935200682405775                            |
| Category              | Term                                                            |
| UP_KEYWORDS           | Amino-acid biosynthesis                                         |
| GOTERM_BP_DIRECT      | GO:0008652~cellular amino acid biosynthetic process             |
| KEGG_PATHWAY          | mmu00270:Cysteine and methionine metabolism                     |
| UP_KEYWORDS           | Pyridoxal phosphate                                             |

KEGG\_PATHWAY mmu01230:Biosynthesis of amino acids  
INTERPRO IPR015421:Pyridoxal phosphate-dependent transferase, major region, sub  
INTERPRO IPR015424:Pyridoxal phosphate-dependent transferase

Annotation Cluster 31 Enrichment Score: 1.0303308030013258  
Category Term  
UP\_KEYWORDS Guanine-nucleotide releasing factor  
GOTERM\_MF\_DIRECT GO:0005085~guanyl-nucleotide exchange factor activity  
GOTERM\_MF\_DIRECT GO:0005089~Rho guanyl-nucleotide exchange factor activity  
SMART SM00325:RhoGEF  
INTERPRO IPR001331:Guanine-nucleotide dissociation stimulator, CDC24, conserved  
INTERPRO IPR000219:Dbl homology (DH) domain  
GOTERM\_BP\_DIRECT GO:0035023~regulation of Rho protein signal transduction  
UP\_SEQ\_FEATURE domain:DH

Annotation Cluster 32 Enrichment Score: 0.9933552816738535  
Category Term  
UP\_SEQ\_FEATURE repeat:ANK 11  
UP\_SEQ\_FEATURE repeat:ANK 19  
UP\_SEQ\_FEATURE repeat:ANK 20  
UP\_SEQ\_FEATURE repeat:ANK 21  
UP\_SEQ\_FEATURE repeat:ANK 17  
UP\_SEQ\_FEATURE repeat:ANK 18  
UP\_SEQ\_FEATURE repeat:ANK 15  
UP\_SEQ\_FEATURE repeat:ANK 16  
UP\_SEQ\_FEATURE repeat:ANK 13  
UP\_SEQ\_FEATURE repeat:ANK 14  
UP\_SEQ\_FEATURE repeat:ANK 12  
UP\_SEQ\_FEATURE repeat:ANK 8  
UP\_SEQ\_FEATURE repeat:ANK 10  
UP\_SEQ\_FEATURE repeat:ANK 7  
UP\_SEQ\_FEATURE repeat:ANK 9  
UP\_SEQ\_FEATURE repeat:ANK 6  
UP\_SEQ\_FEATURE repeat:ANK 5  
UP\_SEQ\_FEATURE repeat:ANK 4  
UP\_KEYWORDS ANK repeat  
SMART SM00248:ANK  
INTERPRO IPR002110:Ankyrin repeat  
INTERPRO IPR020683:Ankyrin repeat-containing domain  
UP\_SEQ\_FEATURE repeat:ANK 3  
UP\_SEQ\_FEATURE repeat:ANK 2  
UP\_SEQ\_FEATURE repeat:ANK 1

Annotation Cluster 33 Enrichment Score: 0.977722014751383  
Category Term  
GOTERM\_MF\_DIRECT GO:0004602~glutathione peroxidase activity  
KEGG\_PATHWAY mmu00480:Glutathione metabolism  
GOTERM\_MF\_DIRECT GO:0004364~glutathione transferase activity  
KEGG\_PATHWAY mmu00980:Metabolism of xenobiotics by cytochrome P450  
KEGG\_PATHWAY mmu00982:Drug metabolism - cytochrome P450

|                       |                                                                     |
|-----------------------|---------------------------------------------------------------------|
| KEGG_PATHWAY          | mmu05204:Chemical carcinogenesis                                    |
| Annotation Cluster 34 | Enrichment Score: 0.9710476564013425                                |
| Category              | Term                                                                |
| GOTERM_BP_DIRECT      | GO:0006974~cellular response to DNA damage stimulus                 |
| UP_KEYWORDS           | DNA repair                                                          |
| UP_KEYWORDS           | DNA damage                                                          |
| GOTERM_BP_DIRECT      | GO:0006281~DNA repair                                               |
| Annotation Cluster 35 | Enrichment Score: 0.9661798554301865                                |
| Category              | Term                                                                |
| UP_KEYWORDS           | Sterol metabolism                                                   |
| GOTERM_BP_DIRECT      | GO:0008202~steroid metabolic process                                |
| UP_KEYWORDS           | Steroid metabolism                                                  |
| UP_KEYWORDS           | Cholesterol metabolism                                              |
| GOTERM_BP_DIRECT      | GO:0008203~cholesterol metabolic process                            |
| GOTERM_BP_DIRECT      | GO:0042632~cholesterol homeostasis                                  |
| Annotation Cluster 36 | Enrichment Score: 0.961467446403975                                 |
| Category              | Term                                                                |
| UP_KEYWORDS           | Vitamin A                                                           |
| UP_KEYWORDS           | Retinol-binding                                                     |
| GOTERM_MF_DIRECT      | GO:0005501~retinoid binding                                         |
| GOTERM_MF_DIRECT      | GO:0016918~retinal binding                                          |
| GOTERM_MF_DIRECT      | GO:0019841~retinol binding                                          |
| INTERPRO              | IPR000463:Cytosolic fatty-acid binding                              |
| INTERPRO              | IPR000566:Lipocalin/cytosolic fatty-acid binding protein domain     |
| INTERPRO              | IPR012674:Calycin                                                   |
| INTERPRO              | IPR011038:Calycin-like                                              |
| Annotation Cluster 37 | Enrichment Score: 0.942074933444372                                 |
| Category              | Term                                                                |
| GOTERM_MF_DIRECT      | GO:0005520~insulin-like growth factor binding                       |
| GOTERM_BP_DIRECT      | GO:0001558~regulation of cell growth                                |
| GOTERM_MF_DIRECT      | GO:0019838~growth factor binding                                    |
| UP_KEYWORDS           | Growth factor binding                                               |
| UP_SEQ_FEATURE        | domain:IGFBP N-terminal                                             |
| SMART                 | SM00121:IB                                                          |
| INTERPRO              | IPR000867:Insulin-like growth factor-binding protein, IGFBP         |
| INTERPRO              | IPR009030:Insulin-like growth factor binding protein, N-terminal    |
| Annotation Cluster 38 | Enrichment Score: 0.9334152272636511                                |
| Category              | Term                                                                |
| COG_ONTOLOGY          | Cell division and chromosome partitioning / Cytoskeleton            |
| INTERPRO              | IPR000408:Regulator of chromosome condensation, RCC1                |
| INTERPRO              | IPR009091:Regulator of chromosome condensation 1/beta-lactamase-inh |
| Annotation Cluster 39 | Enrichment Score: 0.9302006657401664                                |
| Category              | Term                                                                |
| UP_KEYWORDS           | Mitochondrion inner membrane                                        |



|                       |                                                                           |
|-----------------------|---------------------------------------------------------------------------|
| UP_SEQ_FEATURE        | repeat:Solcar 3                                                           |
| INTERPRO              | IPR018108:Mitochondrial substrate/solute carrier                          |
| INTERPRO              | IPR023395:Mitochondrial carrier domain                                    |
| UP_SEQ_FEATURE        | repeat:Solcar 2                                                           |
| UP_SEQ_FEATURE        | repeat:Solcar 1                                                           |
| GOTERM_MF_DIRECT      | GO:0003735~structural constituent of ribosome                             |
| Annotation Cluster 40 | Enrichment Score: 0.9167914720556805                                      |
| Category              | Term                                                                      |
| UP_KEYWORDS           | Tyrosine-protein kinase                                                   |
| INTERPRO              | IPR008266:Tyrosine-protein kinase, active site                            |
| GOTERM_BP_DIRECT      | GO:0030155~regulation of cell adhesion                                    |
| GOTERM_MF_DIRECT      | GO:0004713~protein tyrosine kinase activity                               |
| GOTERM_MF_DIRECT      | GO:0004715~non-membrane spanning protein tyrosine kinase activity         |
| INTERPRO              | IPR001245:Serine-threonine/tyrosine-protein kinase catalytic domain       |
| GOTERM_MF_DIRECT      | GO:0004714~transmembrane receptor protein tyrosine kinase activity        |
| INTERPRO              | IPR020635:Tyrosine-protein kinase, catalytic domain                       |
| SMART                 | SM00219:TyrKc                                                             |
| GOTERM_BP_DIRECT      | GO:0007169~transmembrane receptor protein tyrosine kinase signaling p     |
| GOTERM_BP_DIRECT      | GO:0018108~peptidyl-tyrosine phosphorylation                              |
| GOTERM_CC_DIRECT      | GO:0031234~extrinsic component of cytoplasmic side of plasma membrar      |
| GOTERM_BP_DIRECT      | GO:0038083~peptidyl-tyrosine autophosphorylation                          |
| Annotation Cluster 41 | Enrichment Score: 0.9101077886957015                                      |
| Category              | Term                                                                      |
| KEGG_PATHWAY          | mmu00240:Pyrimidine metabolism                                            |
| UP_KEYWORDS           | DNA-directed RNA polymerase                                               |
| KEGG_PATHWAY          | mmu03020:RNA polymerase                                                   |
| GOTERM_MF_DIRECT      | GO:0003899~DNA-directed RNA polymerase activity                           |
| GOTERM_MF_DIRECT      | GO:0001056~RNA polymerase III activity                                    |
| GOTERM_CC_DIRECT      | GO:0005666~DNA-directed RNA polymerase III complex                        |
| GOTERM_BP_DIRECT      | GO:0006383~transcription from RNA polymerase III promoter                 |
| KEGG_PATHWAY          | mmu00230:Purine metabolism                                                |
| Annotation Cluster 42 | Enrichment Score: 0.909295919223381                                       |
| Category              | Term                                                                      |
| INTERPRO              | IPR008979:Galactose-binding domain-like                                   |
| SMART                 | SM00231:FA58C                                                             |
| INTERPRO              | IPR000421:Coagulation factor 5/8 C-terminal type domain                   |
| Annotation Cluster 43 | Enrichment Score: 0.8590557989265755                                      |
| Category              | Term                                                                      |
| UP_SEQ_FEATURE        | domain:WW 2                                                               |
| UP_SEQ_FEATURE        | domain:WW 1                                                               |
| SMART                 | SM00456:WW                                                                |
| INTERPRO              | IPR001202:WW domain                                                       |
| Annotation Cluster 44 | Enrichment Score: 0.8522780787139118                                      |
| Category              | Term                                                                      |
| GOTERM_MF_DIRECT      | GO:0001077~transcriptional activator activity, RNA polymerase II core prc |

|                       |                                                                        |
|-----------------------|------------------------------------------------------------------------|
| UP_KEYWORDS           | Activator                                                              |
| GOTERM_MF_DIRECT      | GO:0000978~RNA polymerase II core promoter proximal region sequence    |
| Annotation Cluster 45 | Enrichment Score: 0.8131931393363744                                   |
| Category              | Term                                                                   |
| GOTERM_MF_DIRECT      | GO:0005089~Rho guanyl-nucleotide exchange factor activity              |
| INTERPRO              | IPR011993:Pleckstrin homology-like domain                              |
| SMART                 | SM00233:PH                                                             |
| INTERPRO              | IPR001849:Pleckstrin homology domain                                   |
| UP_SEQ_FEATURE        | domain:PH                                                              |
| Annotation Cluster 46 | Enrichment Score: 0.8102154502628406                                   |
| Category              | Term                                                                   |
| UP_SEQ_FEATURE        | binding site:FAD                                                       |
| UP_KEYWORDS           | Flavoprotein                                                           |
| UP_KEYWORDS           | FAD                                                                    |
| GOTERM_MF_DIRECT      | GO:0050660~flavin adenine dinucleotide binding                         |
| UP_SEQ_FEATURE        | nucleotide phosphate-binding region:FAD                                |
| INTERPRO              | IPR023753:Pyridine nucleotide-disulphide oxidoreductase, FAD/NAD(P)-bi |
| Annotation Cluster 47 | Enrichment Score: 0.785894588288057                                    |
| Category              | Term                                                                   |
| UP_SEQ_FEATURE        | domain:Thyroglobulin type-1                                            |
| INTERPRO              | IPR000716:Thyroglobulin type-1                                         |
| SMART                 | SM00211:TY                                                             |
| INTERPRO              | IPR009030:Insulin-like growth factor binding protein, N-terminal       |
| Annotation Cluster 48 | Enrichment Score: 0.7721122140927985                                   |
| Category              | Term                                                                   |
| UP_SEQ_FEATURE        | repeat:II                                                              |
| UP_SEQ_FEATURE        | repeat:I                                                               |
| UP_SEQ_FEATURE        | repeat:IV                                                              |
| UP_SEQ_FEATURE        | repeat:III                                                             |
| Annotation Cluster 49 | Enrichment Score: 0.7660004143384734                                   |
| Category              | Term                                                                   |
| INTERPRO              | IPR011011:Zinc finger, FYVE/PHD-type                                   |
| INTERPRO              | IPR017455:Zinc finger, FYVE-related                                    |
| INTERPRO              | IPR000306:Zinc finger, FYVE-type                                       |
| SMART                 | SM00064:FYVE                                                           |
| Annotation Cluster 50 | Enrichment Score: 0.7531957895348913                                   |
| Category              | Term                                                                   |
| UP_SEQ_FEATURE        | zinc finger region:B box-type                                          |
| INTERPRO              | IPR017907:Zinc finger, RING-type, conserved site                       |
| INTERPRO              | IPR027370:RING-type zinc-finger, LisH dimerisation motif               |
| INTERPRO              | IPR013320:Concanavalin A-like lectin/glucanase, subgroup               |
| INTERPRO              | IPR003879:Butyrophilin-like                                            |
| UP_SEQ_FEATURE        | domain:B30.2/SPRY                                                      |
| SMART                 | SM00336:BBOX                                                           |

INTERPRO IPR000315:Zinc finger, B-box  
SMART SM00449:SPRY  
INTERPRO IPR003877:SPla/Ryanodine receptor SPRY  
INTERPRO IPR001870:B30.2/SPRY domain

Annotation Cluster 51 Enrichment Score: 0.7043878201278949  
Category Term  
UP\_SEQ\_FEATURE zinc finger region:C3H1-type 3  
INTERPRO IPR000571:Zinc finger, CCCH-type  
UP\_SEQ\_FEATURE zinc finger region:C3H1-type 1  
UP\_SEQ\_FEATURE zinc finger region:C3H1-type 2

Annotation Cluster 52 Enrichment Score: 0.6786425511652497  
Category Term  
GOTERM\_BP\_DIRECT GO:0030513~positive regulation of BMP signaling pathway  
GOTERM\_BP\_DIRECT GO:0060045~positive regulation of cardiac muscle cell proliferation  
GOTERM\_BP\_DIRECT GO:0003151~outflow tract morphogenesis

Annotation Cluster 53 Enrichment Score: 0.6406602843562897  
Category Term  
KEGG\_PATHWAY mmu05213:Endometrial cancer  
KEGG\_PATHWAY mmu05222:Small cell lung cancer  
KEGG\_PATHWAY mmu04722:Neurotrophin signaling pathway  
KEGG\_PATHWAY mmu05221:Acute myeloid leukemia  
KEGG\_PATHWAY mmu04917:Prolactin signaling pathway  
KEGG\_PATHWAY mmu05230:Central carbon metabolism in cancer  
KEGG\_PATHWAY mmu04012:ErbB signaling pathway  
KEGG\_PATHWAY mmu04630:Jak-STAT signaling pathway  
KEGG\_PATHWAY mmu05223:Non-small cell lung cancer  
KEGG\_PATHWAY mmu04919:Thyroid hormone signaling pathway  
KEGG\_PATHWAY mmu05205:Proteoglycans in cancer  
KEGG\_PATHWAY mmu05216:Thyroid cancer  
KEGG\_PATHWAY mmu05161:Hepatitis B  
KEGG\_PATHWAY mmu04662:B cell receptor signaling pathway  
KEGG\_PATHWAY mmu04068:FoxO signaling pathway  
KEGG\_PATHWAY mmu05220:Chronic myeloid leukemia  
KEGG\_PATHWAY mmu04210:Apoptosis  
KEGG\_PATHWAY mmu04152:AMPK signaling pathway  
KEGG\_PATHWAY mmu05219:Bladder cancer  
KEGG\_PATHWAY mmu05210:Colorectal cancer  
KEGG\_PATHWAY mmu05212:Pancreatic cancer  
KEGG\_PATHWAY mmu05214:Glioma  
KEGG\_PATHWAY mmu04151:PI3K-Akt signaling pathway  
KEGG\_PATHWAY mmu05211:Renal cell carcinoma  
KEGG\_PATHWAY mmu04930:Type II diabetes mellitus  
KEGG\_PATHWAY mmu05200:Pathways in cancer  
KEGG\_PATHWAY mmu05231:Choline metabolism in cancer  
KEGG\_PATHWAY mmu04660:T cell receptor signaling pathway  
KEGG\_PATHWAY mmu04921:Oxytocin signaling pathway  
KEGG\_PATHWAY mmu04370:VEGF signaling pathway

|                  |                                                           |
|------------------|-----------------------------------------------------------|
| KEGG_PATHWAY     | mmu04931:Insulin resistance                               |
| KEGG_PATHWAY     | mmu05215:Prostate cancer                                  |
| KEGG_PATHWAY     | mmu05166:HTLV-I infection                                 |
| KEGG_PATHWAY     | mmu04973:Carbohydrate digestion and absorption            |
| KEGG_PATHWAY     | mmu04664:Fc epsilon RI signaling pathway                  |
| KEGG_PATHWAY     | mmu05218:Melanoma                                         |
| KEGG_PATHWAY     | mmu04915:Estrogen signaling pathway                       |
| KEGG_PATHWAY     | mmu04650:Natural killer cell mediated cytotoxicity        |
| KEGG_PATHWAY     | mmu04666:Fc gamma R-mediated phagocytosis                 |
| GOTERM_BP_DIRECT | GO:0045471~response to ethanol                            |
| KEGG_PATHWAY     | mmu04150:mTOR signaling pathway                           |
| KEGG_PATHWAY     | mmu04810:Regulation of actin cytoskeleton                 |
| KEGG_PATHWAY     | mmu04932:Non-alcoholic fatty liver disease (NAFLD)        |
| KEGG_PATHWAY     | mmu04910:Insulin signaling pathway                        |
| KEGG_PATHWAY     | mmu04725:Cholinergic synapse                              |
| KEGG_PATHWAY     | mmu04110:Cell cycle                                       |
| KEGG_PATHWAY     | mmu04750:Inflammatory mediator regulation of TRP channels |
| KEGG_PATHWAY     | mmu04022:cGMP-PKG signaling pathway                       |
| KEGG_PATHWAY     | mmu05206:MicroRNAs in cancer                              |
| KEGG_PATHWAY     | mmu04261:Adrenergic signaling in cardiomyocytes           |
| KEGG_PATHWAY     | mmu04071:Sphingolipid signaling pathway                   |
| KEGG_PATHWAY     | mmu04611:Platelet activation                              |
| KEGG_PATHWAY     | mmu04024:cAMP signaling pathway                           |

Annotation Cluster 54

Category

|                |                                 |
|----------------|---------------------------------|
| UP_SEQ_FEATURE | zinc finger region:C2H2-type 5  |
| UP_SEQ_FEATURE | zinc finger region:C2H2-type 4  |
| UP_SEQ_FEATURE | zinc finger region:C2H2-type 7  |
| UP_SEQ_FEATURE | domain:KRAB                     |
| UP_SEQ_FEATURE | zinc finger region:C2H2-type 11 |
| UP_SEQ_FEATURE | zinc finger region:C2H2-type 6  |
| UP_SEQ_FEATURE | zinc finger region:C2H2-type 10 |
| UP_SEQ_FEATURE | zinc finger region:C2H2-type 8  |
| UP_SEQ_FEATURE | zinc finger region:C2H2-type 12 |
| UP_SEQ_FEATURE | zinc finger region:C2H2-type 9  |

Enrichment Score: 0.6385417752083253

Term

Annotation Cluster 55

Category

|                  |                                       |
|------------------|---------------------------------------|
| GOTERM_BP_DIRECT | GO:0030488~tRNA methylation           |
| UP_KEYWORDS      | Methyltransferase                     |
| UP_KEYWORDS      | S-adenosyl-L-methionine               |
| GOTERM_BP_DIRECT | GO:0032259~methylation                |
| GOTERM_MF_DIRECT | GO:0008168~methyltransferase activity |

Enrichment Score: 0.6332217310048168

Term

Annotation Cluster 56

Category

|                |                        |
|----------------|------------------------|
| INTERPRO       | IPR000418:Ets domain   |
| UP_SEQ_FEATURE | DNA-binding region:ETS |
| SMART          | SM00413:ETS            |

Enrichment Score: 0.6284255908370221

Term

|                       |                                                                    |
|-----------------------|--------------------------------------------------------------------|
| Annotation Cluster 57 | Enrichment Score: 0.6232862313951621                               |
| Category              | Term                                                               |
| UP_KEYWORDS           | Thiol protease                                                     |
| GOTERM_MF_DIRECT      | GO:0008234~cysteine-type peptidase activity                        |
| UP_KEYWORDS           | Protease                                                           |
| GOTERM_MF_DIRECT      | GO:0008233~peptidase activity                                      |
| GOTERM_BP_DIRECT      | GO:0006508~proteolysis                                             |
| Annotation Cluster 58 | Enrichment Score: 0.6148810020775494                               |
| Category              | Term                                                               |
| UP_KEYWORDS           | Protein phosphatase                                                |
| GOTERM_BP_DIRECT      | GO:0006470~protein dephosphorylation                               |
| GOTERM_MF_DIRECT      | GO:0004721~phosphoprotein phosphatase activity                     |
| GOTERM_BP_DIRECT      | GO:0016311~dephosphorylation                                       |
| GOTERM_MF_DIRECT      | GO:0016791~phosphatase activity                                    |
| GOTERM_MF_DIRECT      | GO:0004725~protein tyrosine phosphatase activity                   |
| INTERPRO              | IPR000387:Protein-tyrosine/Dual specificity phosphatase            |
| UP_SEQ_FEATURE        | active site:Phosphocysteine intermediate                           |
| INTERPRO              | IPR003595:Protein-tyrosine phosphatase, catalytic                  |
| SMART                 | SM00404:PTPc_motif                                                 |
| UP_SEQ_FEATURE        | domain:Tyrosine-protein phosphatase                                |
| SMART                 | SM00194:PTPc                                                       |
| INTERPRO              | IPR000242:Protein-tyrosine phosphatase, receptor/non-receptor type |
| INTERPRO              | IPR016130:Protein-tyrosine phosphatase, active site                |
| Annotation Cluster 59 | Enrichment Score: 0.6144837198312858                               |
| Category              | Term                                                               |
| GOTERM_CC_DIRECT      | GO:0005770~late endosome                                           |
| GOTERM_CC_DIRECT      | GO:0005764~lysosome                                                |
| UP_KEYWORDS           | Lysosome                                                           |
| Annotation Cluster 60 | Enrichment Score: 0.6135038683522933                               |
| Category              | Term                                                               |
| UP_KEYWORDS           | Thiol protease                                                     |
| GOTERM_MF_DIRECT      | GO:0008234~cysteine-type peptidase activity                        |
| GOTERM_MF_DIRECT      | GO:0036459~thiol-dependent ubiquitinyl hydrolase activity          |
| GOTERM_BP_DIRECT      | GO:0071108~protein K48-linked deubiquitination                     |
| GOTERM_BP_DIRECT      | GO:0016579~protein deubiquitination                                |
| GOTERM_MF_DIRECT      | GO:0004843~thiol-dependent ubiquitin-specific protease activity    |
| GOTERM_BP_DIRECT      | GO:0006511~ubiquitin-dependent protein catabolic process           |
| Annotation Cluster 61 | Enrichment Score: 0.5878897039358573                               |
| Category              | Term                                                               |
| KEGG_PATHWAY          | mmu00910:Nitrogen metabolism                                       |
| UP_KEYWORDS           | Lyase                                                              |
| GOTERM_MF_DIRECT      | GO:0016829~lyase activity                                          |
| Annotation Cluster 62 | Enrichment Score: 0.5838541340280756                               |
| Category              | Term                                                               |

|                       |                                                              |
|-----------------------|--------------------------------------------------------------|
| GOTERM_MF_DIRECT      | GO:0004519~endonuclease activity                             |
| INTERPRO              | IPR001279:Beta-lactamase-like                                |
| UP_KEYWORDS           | Endonuclease                                                 |
| UP_KEYWORDS           | Nuclease                                                     |
| GOTERM_MF_DIRECT      | GO:0004518~nuclease activity                                 |
| Annotation Cluster 63 | Enrichment Score: 0.5594431285648914                         |
| Category              | Term                                                         |
| INTERPRO              | IPR020846:Major facilitator superfamily domain               |
| INTERPRO              | IPR011701:Major facilitator superfamily                      |
| GOTERM_BP_DIRECT      | GO:0055085~transmembrane transport                           |
| Annotation Cluster 64 | Enrichment Score: 0.5279269881069204                         |
| Category              | Term                                                         |
| GOTERM_MF_DIRECT      | GO:0004896~cytokine receptor activity                        |
| UP_SEQ_FEATURE        | short sequence motif:WSXWS motif                             |
| INTERPRO              | IPR003961:Fibronectin, type III                              |
| Annotation Cluster 65 | Enrichment Score: 0.5189531100740667                         |
| Category              | Term                                                         |
| UP_KEYWORDS           | Prenylation                                                  |
| UP_SEQ_FEATURE        | lipid moiety-binding region:S-geranylgeranyl cysteine        |
| INTERPRO              | IPR005225:Small GTP-binding protein domain                   |
| UP_SEQ_FEATURE        | propeptide:Removed in mature form                            |
| GOTERM_BP_DIRECT      | GO:0007264~small GTPase mediated signal transduction         |
| UP_SEQ_FEATURE        | short sequence motif:Effector region                         |
| INTERPRO              | IPR001806:Small GTPase superfamily                           |
| Annotation Cluster 66 | Enrichment Score: 0.5016849133043755                         |
| Category              | Term                                                         |
| INTERPRO              | IPR013087:Zinc finger C2H2-type/integrase DNA-binding domain |
| UP_SEQ_FEATURE        | domain:KRAB                                                  |
| SMART                 | SM00349:KRAB                                                 |
| INTERPRO              | IPR001909:Krueppel-associated box                            |
| Annotation Cluster 67 | Enrichment Score: 0.48627507285377                           |
| Category              | Term                                                         |
| UP_KEYWORDS           | Oxidoreductase                                               |
| GOTERM_MF_DIRECT      | GO:0016491~oxidoreductase activity                           |
| GOTERM_BP_DIRECT      | GO:0055114~oxidation-reduction process                       |
| Annotation Cluster 68 | Enrichment Score: 0.46453256967911033                        |
| Category              | Term                                                         |
| INTERPRO              | IPR013761:Sterile alpha motif/pointed domain                 |
| INTERPRO              | IPR001660:Sterile alpha motif domain                         |
| SMART                 | SM00454:SAM                                                  |
| UP_SEQ_FEATURE        | domain:SAM                                                   |
| Annotation Cluster 69 | Enrichment Score: 0.45758300230633847                        |
| Category              | Term                                                         |

GOTERM\_MF\_DIRECT GO:0030881~beta-2-microglobulin binding  
GOTERM\_CC\_DIRECT GO:0042612~MHC class I protein complex  
GOTERM\_MF\_DIRECT GO:0042605~peptide antigen binding  
INTERPRO IPR011161:MHC class I-like antigen recognition  
GOTERM\_BP\_DIRECT GO:0002474~antigen processing and presentation of peptide antigen via MHC class I/II-like antigen recognition protein  
INTERPRO IPR011162:MHC classes I/II-like antigen recognition protein  
INTERPRO IPR001039:MHC class I, alpha chain, alpha1/alpha2  
INTERPRO IPR003006:Immunoglobulin/major histocompatibility complex, conserved  
SMART SM00407:IGc1  
INTERPRO IPR003597:Immunoglobulin C1-set

Annotation Cluster 70 Enrichment Score: 0.4514343275886803  
Category Term  
UP\_SEQ\_FEATURE domain:SANT  
INTERPRO IPR017884:SANT domain  
INTERPRO IPR001005:SANT/Myb domain  
SMART SM00717:SANT  
INTERPRO IPR009057:Homeodomain-like

Annotation Cluster 71 Enrichment Score: 0.4489217265794778  
Category Term  
INTERPRO IPR000301:Tetraspanin  
INTERPRO IPR008952:Tetraspanin, EC2 domain  
INTERPRO IPR018499:Tetraspanin/Peripherin  
PIR\_SUPERFAMILY PIRSF002419:tetraspanin  
GOTERM\_BP\_DIRECT GO:0007166~cell surface receptor signaling pathway

Annotation Cluster 72 Enrichment Score: 0.4448921835253668  
Category Term  
INTERPRO IPR018980:FERM, C-terminal PH-like domain  
SMART SM01196:SM01196  
INTERPRO IPR018979:FERM, N-terminal  
INTERPRO IPR014352:FERM/acyl-CoA-binding protein, 3-helical bundle  
UP\_SEQ\_FEATURE domain:FERM  
INTERPRO IPR000299:FERM domain  
INTERPRO IPR019748:FERM central domain  
INTERPRO IPR019749:Band 4.1 domain  
SMART SM00295:B41

Annotation Cluster 73 Enrichment Score: 0.44206365319982555  
Category Term  
GOTERM\_CC\_DIRECT GO:0005761~mitochondrial ribosome  
GOTERM\_CC\_DIRECT GO:0030529~intracellular ribonucleoprotein complex  
UP\_KEYWORDS Ribonucleoprotein  
UP\_KEYWORDS Ribosomal protein  
GOTERM\_MF\_DIRECT GO:0003735~structural constituent of ribosome  
GOTERM\_CC\_DIRECT GO:0005840~ribosome  
KEGG\_PATHWAY mmu03010:Ribosome

Annotation Cluster 74 Enrichment Score: 0.4362364757988361

|                       |                                                      |
|-----------------------|------------------------------------------------------|
| Category              | Term                                                 |
| SMART                 | SM00228:PDZ                                          |
| INTERPRO              | IPR001478:PDZ domain                                 |
| UP_SEQ_FEATURE        | domain:PDZ                                           |
| Annotation Cluster 75 | Enrichment Score: 0.41532921637339754                |
| Category              | Term                                                 |
| UP_KEYWORDS           | Iron-sulfur                                          |
| GOTERM_MF_DIRECT      | GO:0051536~iron-sulfur cluster binding               |
| GOTERM_MF_DIRECT      | GO:0051539~4 iron, 4 sulfur cluster binding          |
| Annotation Cluster 76 | Enrichment Score: 0.40239885396406344                |
| Category              | Term                                                 |
| GOTERM_MF_DIRECT      | GO:0042605~peptide antigen binding                   |
| GOTERM_CC_DIRECT      | GO:0030670~phagocytic vesicle membrane               |
| KEGG_PATHWAY          | mmu04612:Antigen processing and presentation         |
| KEGG_PATHWAY          | mmu04145:Phagosome                                   |
| Annotation Cluster 77 | Enrichment Score: 0.3996273979904003                 |
| Category              | Term                                                 |
| INTERPRO              | IPR011011:Zinc finger, FYVE/PHD-type                 |
| INTERPRO              | IPR001965:Zinc finger, PHD-type                      |
| SMART                 | SM00249:PHD                                          |
| Annotation Cluster 78 | Enrichment Score: 0.3938020712528611                 |
| Category              | Term                                                 |
| INTERPRO              | IPR004046:Glutathione S-transferase, C-terminal      |
| INTERPRO              | IPR010987:Glutathione S-transferase, C-terminal-like |
| INTERPRO              | IPR012336:Thioredoxin-like fold                      |
| Annotation Cluster 79 | Enrichment Score: 0.3873086630728798                 |
| Category              | Term                                                 |
| KEGG_PATHWAY          | mmu04668:TNF signaling pathway                       |
| KEGG_PATHWAY          | mmu04060:Cytokine-cytokine receptor interaction      |
| UP_KEYWORDS           | Cytokine                                             |
| GOTERM_MF_DIRECT      | GO:0005125~cytokine activity                         |
| Annotation Cluster 80 | Enrichment Score: 0.38061934520077645                |
| Category              | Term                                                 |
| KEGG_PATHWAY          | mmu04152:AMPK signaling pathway                      |
| KEGG_PATHWAY          | mmu04920:Adipocytokine signaling pathway             |
| KEGG_PATHWAY          | mmu04922:Glucagon signaling pathway                  |
| Annotation Cluster 81 | Enrichment Score: 0.37153751789139633                |
| Category              | Term                                                 |
| UP_KEYWORDS           | Cilium biogenesis/degradation                        |
| UP_KEYWORDS           | Cilium                                               |
| GOTERM_CC_DIRECT      | GO:0005929~cilium                                    |
| GOTERM_BP_DIRECT      | GO:0035058~nonmotile primary cilium assembly         |
| GOTERM_CC_DIRECT      | GO:0036064~ciliary basal body                        |



|                       |                                                   |
|-----------------------|---------------------------------------------------|
| GOTERM_BP_DIRECT      | GO:0030030~cell projection organization           |
| GOTERM_BP_DIRECT      | GO:0060271~cilium morphogenesis                   |
| GOTERM_BP_DIRECT      | GO:0042384~cilium assembly                        |
| GOTERM_CC_DIRECT      | GO:0005813~centrosome                             |
| GOTERM_CC_DIRECT      | GO:0005814~centriole                              |
| Annotation Cluster 82 | Enrichment Score: 0.3705070915495205              |
| Category              | Term                                              |
| UP_SEQ_FEATURE        | repeat:HEAT 5                                     |
| UP_SEQ_FEATURE        | repeat:HEAT 4                                     |
| UP_SEQ_FEATURE        | repeat:HEAT 3                                     |
| UP_SEQ_FEATURE        | repeat:HEAT 2                                     |
| UP_SEQ_FEATURE        | repeat:HEAT 1                                     |
| Annotation Cluster 83 | Enrichment Score: 0.3598759140924123              |
| Category              | Term                                              |
| KEGG_PATHWAY          | mmu04146:Peroxisome                               |
| UP_KEYWORDS           | Peroxisome                                        |
| GOTERM_CC_DIRECT      | GO:0005777~peroxisome                             |
| Annotation Cluster 84 | Enrichment Score: 0.35442010473239455             |
| Category              | Term                                              |
| UP_KEYWORDS           | Fatty acid metabolism                             |
| UP_KEYWORDS           | Lipid biosynthesis                                |
| GOTERM_BP_DIRECT      | GO:0006631~fatty acid metabolic process           |
| UP_KEYWORDS           | Fatty acid biosynthesis                           |
| GOTERM_BP_DIRECT      | GO:0006633~fatty acid biosynthetic process        |
| Annotation Cluster 85 | Enrichment Score: 0.34553165307304123             |
| Category              | Term                                              |
| INTERPRO              | IPR001791:Laminin G domain                        |
| SMART                 | SM00282:LamG                                      |
| INTERPRO              | IPR000742:Epidermal growth factor-like domain     |
| Annotation Cluster 86 | Enrichment Score: 0.33383052249262757             |
| Category              | Term                                              |
| UP_KEYWORDS           | WD repeat                                         |
| INTERPRO              | IPR015943:WD40/YVTN repeat-like-containing domain |
| INTERPRO              | IPR001680:WD40 repeat                             |
| SMART                 | SM00320:WD40                                      |
| INTERPRO              | IPR017986:WD40-repeat-containing domain           |
| INTERPRO              | IPR020472:G-protein beta WD-40 repeat             |
| UP_SEQ_FEATURE        | repeat:WD 3                                       |
| UP_SEQ_FEATURE        | repeat:WD 2                                       |
| UP_SEQ_FEATURE        | repeat:WD 1                                       |
| INTERPRO              | IPR019775:WD40 repeat, conserved site             |
| UP_SEQ_FEATURE        | repeat:WD 4                                       |
| UP_SEQ_FEATURE        | repeat:WD 5                                       |
| UP_SEQ_FEATURE        | repeat:WD 6                                       |
| UP_SEQ_FEATURE        | repeat:WD 7                                       |

|                       |                                                            |
|-----------------------|------------------------------------------------------------|
| Annotation Cluster 87 | Enrichment Score: 0.30948291087418495                      |
| Category              | Term                                                       |
| GOTERM_BP_DIRECT      | GO:0051017~actin filament bundle assembly                  |
| UP_SEQ_FEATURE        | domain:SH3                                                 |
| UP_KEYWORDS           | SH3 domain                                                 |
| INTERPRO              | IPR001452:Src homology-3 domain                            |
| SMART                 | SM00326:SH3                                                |
| <br>                  |                                                            |
| Annotation Cluster 88 | Enrichment Score: 0.289429360398106                        |
| Category              | Term                                                       |
| KEGG_PATHWAY          | mmu04510:Focal adhesion                                    |
| KEGG_PATHWAY          | mmu05146:Amoebiasis                                        |
| KEGG_PATHWAY          | mmu04512:ECM-receptor interaction                          |
| GOTERM_CC_DIRECT      | GO:0005604~basement membrane                               |
| <br>                  |                                                            |
| Annotation Cluster 89 | Enrichment Score: 0.28825240509910094                      |
| Category              | Term                                                       |
| GOTERM_MF_DIRECT      | GO:0070888~E-box binding                                   |
| UP_SEQ_FEATURE        | DNA-binding region:Basic motif                             |
| SMART                 | SM00353:HLH                                                |
| INTERPRO              | IPR011598:Myc-type, basic helix-loop-helix (bHLH) domain   |
| UP_SEQ_FEATURE        | domain:Helix-loop-helix motif                              |
| GOTERM_MF_DIRECT      | GO:0046983~protein dimerization activity                   |
| <br>                  |                                                            |
| Annotation Cluster 90 | Enrichment Score: 0.246599578011054                        |
| Category              | Term                                                       |
| UP_SEQ_FEATURE        | domain:SH2                                                 |
| INTERPRO              | IPR000980:SH2 domain                                       |
| UP_KEYWORDS           | SH2 domain                                                 |
| SMART                 | SM00252:SH2                                                |
| <br>                  |                                                            |
| Annotation Cluster 91 | Enrichment Score: 0.2274488224850573                       |
| Category              | Term                                                       |
| GOTERM_MF_DIRECT      | GO:0061630~ubiquitin protein ligase activity               |
| UP_KEYWORDS           | Ubl conjugation pathway                                    |
| GOTERM_BP_DIRECT      | GO:0016567~protein ubiquitination                          |
| GOTERM_MF_DIRECT      | GO:0004842~ubiquitin-protein transferase activity          |
| <br>                  |                                                            |
| Annotation Cluster 92 | Enrichment Score: 0.22614544450373625                      |
| Category              | Term                                                       |
| INTERPRO              | IPR008160:Collagen triple helix repeat                     |
| UP_KEYWORDS           | Collagen                                                   |
| UP_KEYWORDS           | Extracellular matrix                                       |
| GOTERM_CC_DIRECT      | GO:0005581~collagen trimer                                 |
| <br>                  |                                                            |
| Annotation Cluster 93 | Enrichment Score: 0.2163118368490164                       |
| Category              | Term                                                       |
| GOTERM_CC_DIRECT      | GO:0005913~cell-cell adherens junction                     |
| GOTERM_MF_DIRECT      | GO:0098641~cadherin binding involved in cell-cell adhesion |

|                       |                                                                     |
|-----------------------|---------------------------------------------------------------------|
| GOTERM_BP_DIRECT      | GO:0098609~cell-cell adhesion                                       |
| Annotation Cluster 94 | Enrichment Score: 0.21534295115873656                               |
| Category              | Term                                                                |
| UP_SEQ_FEATURE        | domain:C2                                                           |
| INTERPRO              | IPR000008:C2 calcium-dependent membrane targeting                   |
| SMART                 | SM00239:C2                                                          |
| Annotation Cluster 95 | Enrichment Score: 0.2091659143714945                                |
| Category              | Term                                                                |
| INTERPRO              | IPR017871:ABC transporter, conserved site                           |
| KEGG_PATHWAY          | mmu02010:ABC transporters                                           |
| GOTERM_MF_DIRECT      | GO:0042626~ATPase activity, coupled to transmembrane movement of su |
| INTERPRO              | IPR003439:ABC transporter-like                                      |
| INTERPRO              | IPR003593:AAA+ ATPase domain                                        |
| SMART                 | SM00382:AAA                                                         |
| GOTERM_MF_DIRECT      | GO:0016887~ATPase activity                                          |
| Annotation Cluster 96 | Enrichment Score: 0.1942465727085632                                |
| Category              | Term                                                                |
| INTERPRO              | IPR008936:Rho GTPase activation protein                             |
| SMART                 | SM00324:RhoGAP                                                      |
| UP_SEQ_FEATURE        | domain:Rho-GAP                                                      |
| INTERPRO              | IPR000198:Rho GTPase-activating protein domain                      |
| Annotation Cluster 97 | Enrichment Score: 0.18936787762871923                               |
| Category              | Term                                                                |
| GOTERM_CC_DIRECT      | GO:0016020~membrane                                                 |
| UP_SEQ_FEATURE        | transmembrane region                                                |
| UP_KEYWORDS           | Membrane                                                            |
| UP_SEQ_FEATURE        | topological domain:Extracellular                                    |
| UP_SEQ_FEATURE        | topological domain:Cytoplasmic                                      |
| UP_SEQ_FEATURE        | glycosylation site:N-linked (GlcNAc...)                             |
| UP_KEYWORDS           | Transmembrane helix                                                 |
| UP_KEYWORDS           | Transmembrane                                                       |
| GOTERM_CC_DIRECT      | GO:0016021~integral component of membrane                           |
| Annotation Cluster 98 | Enrichment Score: 0.15511653346524382                               |
| Category              | Term                                                                |
| GOTERM_CC_DIRECT      | GO:0014069~postsynaptic density                                     |
| UP_KEYWORDS           | Synapse                                                             |
| GOTERM_CC_DIRECT      | GO:0045202~synapse                                                  |
| UP_KEYWORDS           | Cell junction                                                       |
| GOTERM_CC_DIRECT      | GO:0030054~cell junction                                            |
| Annotation Cluster 99 | Enrichment Score: 0.15156651398096185                               |
| Category              | Term                                                                |
| KEGG_PATHWAY          | mmu05410:Hypertrophic cardiomyopathy (HCM)                          |
| KEGG_PATHWAY          | mmu05412:Arrhythmogenic right ventricular cardiomyopathy (ARVC)     |
| KEGG_PATHWAY          | mmu05414:Dilated cardiomyopathy                                     |

|                        |                                                                    |
|------------------------|--------------------------------------------------------------------|
| Annotation Cluster 100 | Enrichment Score: 0.14655563940347935                              |
| Category               | Term                                                               |
| UP_KEYWORDS            | Biological rhythms                                                 |
| GOTERM_BP_DIRECT       | GO:0048511~rhythmic process                                        |
| GOTERM_BP_DIRECT       | GO:0007623~circadian rhythm                                        |
| Annotation Cluster 101 | Enrichment Score: 0.13499607529702456                              |
| Category               | Term                                                               |
| UP_SEQ_FEATURE         | domain:Ig-like C2-type                                             |
| INTERPRO               | IPR013098:Immunoglobulin I-set                                     |
| UP_KEYWORDS            | Immunoglobulin domain                                              |
| INTERPRO               | IPR003598:Immunoglobulin subtype 2                                 |
| SMART                  | SM00408:IGc2                                                       |
| INTERPRO               | IPR003599:Immunoglobulin subtype                                   |
| SMART                  | SM00409:IG                                                         |
| INTERPRO               | IPR013783:Immunoglobulin-like fold                                 |
| INTERPRO               | IPR007110:Immunoglobulin-like domain                               |
| Annotation Cluster 102 | Enrichment Score: 0.09372770012503656                              |
| Category               | Term                                                               |
| UP_SEQ_FEATURE         | domain:BTB                                                         |
| SMART                  | SM00225:BTB                                                        |
| INTERPRO               | IPR000210:BTB/POZ-like                                             |
| INTERPRO               | IPR011333:BTB/POZ fold                                             |
| Annotation Cluster 103 | Enrichment Score: 0.0922369706912232                               |
| Category               | Term                                                               |
| INTERPRO               | IPR000742:Epidermal growth factor-like domain                      |
| UP_SEQ_FEATURE         | domain:EGF-like                                                    |
| UP_KEYWORDS            | EGF-like domain                                                    |
| UP_SEQ_FEATURE         | domain:EGF-like 2                                                  |
| INTERPRO               | IPR013032:EGF-like, conserved site                                 |
| UP_SEQ_FEATURE         | domain:EGF-like 1                                                  |
| SMART                  | SM00181:EGF                                                        |
| Annotation Cluster 104 | Enrichment Score: 0.08555796835887602                              |
| Category               | Term                                                               |
| INTERPRO               | IPR013164:Cadherin, N-terminal                                     |
| INTERPRO               | IPR002126:Cadherin                                                 |
| SMART                  | SM00112:CA                                                         |
| INTERPRO               | IPR015919:Cadherin-like                                            |
| INTERPRO               | IPR020894:Cadherin conserved site                                  |
| GOTERM_BP_DIRECT       | GO:0007156~homophilic cell adhesion via plasma membrane adhesion m |
| Annotation Cluster 105 | Enrichment Score: 0.08421116676238453                              |
| Category               | Term                                                               |
| UP_SEQ_FEATURE         | repeat:LRR 10                                                      |
| UP_SEQ_FEATURE         | repeat:LRR 11                                                      |
| UP_SEQ_FEATURE         | repeat:LRR 9                                                       |

|                        |                                                      |
|------------------------|------------------------------------------------------|
| UP_SEQ_FEATURE         | repeat:LRR 13                                        |
| UP_SEQ_FEATURE         | repeat:LRR 8                                         |
| UP_SEQ_FEATURE         | repeat:LRR 12                                        |
| UP_SEQ_FEATURE         | repeat:LRR 7                                         |
| UP_SEQ_FEATURE         | repeat:LRR 6                                         |
| INTERPRO               | IPR003591:Leucine-rich repeat, typical subtype       |
| UP_SEQ_FEATURE         | repeat:LRR 5                                         |
| UP_KEYWORDS            | Leucine-rich repeat                                  |
| SMART                  | SM00369:LRR_TYP                                      |
| UP_SEQ_FEATURE         | repeat:LRR 4                                         |
| INTERPRO               | IPR001611:Leucine-rich repeat                        |
| UP_SEQ_FEATURE         | repeat:LRR 3                                         |
| UP_SEQ_FEATURE         | repeat:LRR 2                                         |
| UP_SEQ_FEATURE         | repeat:LRR 1                                         |
|                        |                                                      |
| Annotation Cluster 106 | Enrichment Score: 0.07513508155008054                |
| Category               | Term                                                 |
| GOTERM_BP_DIRECT       | GO:0034765~regulation of ion transmembrane transport |
| UP_KEYWORDS            | Voltage-gated channel                                |
| GOTERM_MF_DIRECT       | GO:0005244~voltage-gated ion channel activity        |
| UP_KEYWORDS            | Ion channel                                          |
|                        |                                                      |
| Annotation Cluster 107 | Enrichment Score: 0.05142447157418296                |
| Category               | Term                                                 |
| GOTERM_MF_DIRECT       | GO:0008236~serine-type peptidase activity            |
| GOTERM_MF_DIRECT       | GO:0004252~serine-type endopeptidase activity        |
| UP_KEYWORDS            | Serine protease                                      |
|                        |                                                      |
| Annotation Cluster 108 | Enrichment Score: 0.03904906240784728                |
| Category               | Term                                                 |
| UP_KEYWORDS            | Ion transport                                        |
| GOTERM_BP_DIRECT       | GO:0006811~ion transport                             |
| UP_KEYWORDS            | Ion channel                                          |
|                        |                                                      |
| Annotation Cluster 109 | Enrichment Score: 0.03650113345805451                |
| Category               | Term                                                 |
| UP_SEQ_FEATURE         | repeat:4                                             |
| UP_SEQ_FEATURE         | repeat:3                                             |
| UP_SEQ_FEATURE         | repeat:5                                             |
| UP_SEQ_FEATURE         | repeat:1                                             |
| UP_SEQ_FEATURE         | repeat:2                                             |
|                        |                                                      |
| Annotation Cluster 110 | Enrichment Score: 0.035104293344696426               |
| Category               | Term                                                 |
| INTERPRO               | IPR011992:EF-hand-like domain                        |
| SMART                  | SM00054:EFh                                          |
| UP_SEQ_FEATURE         | calcium-binding region:2                             |
| UP_SEQ_FEATURE         | calcium-binding region:1                             |
| UP_SEQ_FEATURE         | domain:EF-hand 2                                     |
| INTERPRO               | IPR002048:EF-hand domain                             |

|                        |                                           |
|------------------------|-------------------------------------------|
| UP_SEQ_FEATURE         | domain:EF-hand 1                          |
| INTERPRO               | IPR018247:EF-Hand 1, calcium-binding site |
| Annotation Cluster 111 | Enrichment Score: 0.032814098359388214    |
| Category               | Term                                      |
| UP_KEYWORDS            | mRNA processing                           |
| KEGG_PATHWAY           | mmu03015:mRNA surveillance pathway        |
| GOTERM_BP_DIRECT       | GO:0006397~mRNA processing                |
| UP_KEYWORDS            | mRNA splicing                             |
| GOTERM_BP_DIRECT       | GO:0008380~RNA splicing                   |
| Annotation Cluster 112 | Enrichment Score: 0.016729313217965877    |
| Category               | Term                                      |
| UP_KEYWORDS            | Cell cycle                                |
| UP_KEYWORDS            | Cell division                             |
| GOTERM_BP_DIRECT       | GO:0007049~cell cycle                     |
| GOTERM_BP_DIRECT       | GO:0007067~mitotic nuclear division       |
| GOTERM_BP_DIRECT       | GO:0051301~cell division                  |
| UP_KEYWORDS            | Mitosis                                   |
| Annotation Cluster 113 | Enrichment Score: 0.015185607101453584    |
| Category               | Term                                      |
| GOTERM_CC_DIRECT       | GO:0005615~extracellular space            |
| UP_KEYWORDS            | Secreted                                  |
| GOTERM_CC_DIRECT       | GO:0005576~extracellular region           |
| UP_SEQ_FEATURE         | signal peptide                            |
| Annotation Cluster 114 | Enrichment Score: 0.004370800534753207    |
| Category               | Term                                      |
| INTERPRO               | IPR009057:Homeodomain-like                |
| INTERPRO               | IPR017970:Homeobox, conserved site        |
| UP_SEQ_FEATURE         | DNA-binding region:Homeobox               |
| UP_KEYWORDS            | Homeobox                                  |
| SMART                  | SM00389:HOX                               |
| INTERPRO               | IPR001356:Homeodomain                     |
| Annotation Cluster 115 | Enrichment Score: 0.003898878823604014    |
| Category               | Term                                      |
| UP_KEYWORDS            | Glycoprotein                              |
| UP_KEYWORDS            | Disulfide bond                            |
| UP_SEQ_FEATURE         | topological domain:Extracellular          |
| UP_SEQ_FEATURE         | topological domain:Cytoplasmic            |
| UP_SEQ_FEATURE         | signal peptide                            |
| UP_SEQ_FEATURE         | disulfide bond                            |
| UP_SEQ_FEATURE         | glycosylation site:N-linked (GlcNAc...)   |
| UP_KEYWORDS            | Signal                                    |

| Count | %        | PValue   | Genes        | List Total | Pop Hits | Pop Total | Fold Enrich | Bonferroni |
|-------|----------|----------|--------------|------------|----------|-----------|-------------|------------|
| 29    | 3.877005 | 6.57E-20 | IFIH1, IFITM | 661        | 84       | 18082     | 9.444168    | 1.88E-16   |
| 35    | 4.679144 | 1.75E-16 | IFIH1, APOI  | 661        | 167      | 18082     | 5.733193    | 6.35E-13   |
| 39    | 5.213904 | 4.52E-16 | IFIH1, ZC3F  | 728        | 241      | 22680     | 5.041494    | 1.50E-13   |
| 25    | 3.342246 | 7.69E-15 | IFIH1, POLF  | 728        | 100      | 22680     | 7.788462    | 2.59E-12   |
| 47    | 6.283422 | 7.42E-14 | IFIH1, ZC3F  | 728        | 401      | 22680     | 3.651448    | 2.51E-11   |
| 44    | 5.882353 | 5.98E-11 | IFIH1, ZC3F  | 661        | 383      | 18082     | 3.142671    | 1.71E-07   |
| 13    | 1.737968 | 5.85E-10 | BST2, ZC3H   | 661        | 32       | 18082     | 11.11318    | 1.67E-06   |
| 42    | 5.614973 | 2.63E-09 | IFIH1, ZC3F  | 661        | 400      | 18082     | 2.87233     | 7.53E-06   |

| Count | %        | PValue   | Genes      | List Total | Pop Hits | Pop Total | Fold Enrich | Bonferroni |
|-------|----------|----------|------------|------------|----------|-----------|-------------|------------|
| 169   | 22.59358 | 2.45E-09 | S100A6, AF | 728        | 3395     | 22680     | 1.55081     | 8.27E-07   |
| 117   | 15.64171 | 3.66E-09 | S100A5, AF | 728        | 2099     | 22680     | 1.736541    | 1.24E-06   |
| 84    | 11.22995 | 4.18E-06 | ZFP13, ZC3 | 728        | 1565     | 22680     | 1.672155    | 0.001413   |
| 167   | 22.3262  | 1.57E-05 | S100A6, AF | 642        | 3355     | 17446     | 1.352648    | 0.013605   |

| Count | %        | PValue   | Genes       | List Total | Pop Hits | Pop Total | Fold Enrich | Bonferroni |
|-------|----------|----------|-------------|------------|----------|-----------|-------------|------------|
| 8     | 1.069519 | 2.54E-08 | OASL2, OAS  | 642        | 11       | 17446     | 19.76324    | 2.21E-05   |
| 16    | 2.139037 | 2.82E-08 | IFIH1, ADAI | 642        | 70       | 17446     | 6.211304    | 2.46E-05   |
| 8     | 1.069519 | 3.51E-08 | OASL2, OAS  | 702        | 12       | 20594     | 19.55745    | 4.63E-05   |
| 8     | 1.069519 | 3.51E-08 | OASL2, OAS  | 702        | 12       | 20594     | 19.55745    | 4.63E-05   |
| 7     | 0.935829 | 4.02E-08 | OASL2, OAS  | 702        | 8        | 20594     | 25.66916    | 5.31E-05   |
| 8     | 1.069519 | 1.43E-07 | OASL2, OAS  | 702        | 14       | 20594     | 16.76353    | 1.89E-04   |
| 6     | 0.802139 | 6.98E-05 | OASL2, OAS  | 702        | 14       | 20594     | 12.57265    | 0.088118   |
| 6     | 0.802139 | 6.27E-04 | ADSS, OASI  | 661        | 20       | 18082     | 8.206657    | 0.833433   |
| 11    | 1.470588 | 0.001094 | POLI, REV1  | 642        | 85       | 17446     | 3.516694    | 0.614501   |
| 9     | 1.203209 | 0.002967 | POLI, REV1  | 728        | 76       | 22680     | 3.689271    | 0.633737   |
| 19    | 2.540107 | 0.011386 | OAS3, H2-L  | 661        | 272      | 18082     | 1.910864    | 1          |

| Count | %        | PValue   | Genes      | List Total | Pop Hits | Pop Total | Fold Enrich | Bonferroni |
|-------|----------|----------|------------|------------|----------|-----------|-------------|------------|
| 15    | 2.005348 | 9.20E-11 | IRGM1, IRC | 661        | 41       | 18082     | 10.00812    | 2.63E-07   |
| 8     | 1.069519 | 1.18E-06 | IRGM1, IRC | 702        | 18       | 20594     | 13.0383     | 0.001555   |
| 19    | 2.540107 | 7.29E-04 | GBP7, RAB  | 642        | 209      | 17446     | 2.470405    | 0.469985   |
| 9     | 1.203209 | 0.062091 | IRGM1, IRC | 661        | 116      | 18082     | 2.122411    | 1          |

| Count | %        | PValue   | Genes       | List Total | Pop Hits | Pop Total | Fold Enrich | Bonferroni |
|-------|----------|----------|-------------|------------|----------|-----------|-------------|------------|
| 24    | 3.208556 | 2.61E-06 | TRP53, TRA  | 289        | 208      | 7720      | 3.082246    | 6.49E-04   |
| 19    | 2.540107 | 2.63E-06 | TRP53, IFIH | 289        | 136      | 7720      | 3.731936    | 6.54E-04   |
| 21    | 2.807487 | 5.12E-06 | IFIH1, AGFC | 289        | 171      | 7720      | 3.28052     | 0.001273   |
| 16    | 2.139037 | 1.55E-04 | TRP53, PIK  | 289        | 136      | 7720      | 3.142683    | 0.03776    |

| Count | %        | PValue   | Genes      | List Total | Pop Hits | Pop Total | Fold Enrich | Bonferroni |
|-------|----------|----------|------------|------------|----------|-----------|-------------|------------|
| 68    | 9.090909 | 8.63E-08 | NDUFAF6, I | 728        | 1058     | 22680     | 2.002327    | 2.92E-05   |
| 33    | 4.411765 | 2.58E-04 | ME3, NDUF  | 728        | 510      | 22680     | 2.015837    | 0.083587   |

|    |          |          |           |     |     |       |         |   |
|----|----------|----------|-----------|-----|-----|-------|---------|---|
| 29 | 3.877005 | 0.010398 | ME3, NDUF | 638 | 496 | 18012 | 1.65066 | 1 |
|----|----------|----------|-----------|-----|-----|-------|---------|---|

| Count | %        | PValue   | Genes      | List Total | Pop Hits | Pop Total | Fold Enrich | Bonferroni |
|-------|----------|----------|------------|------------|----------|-----------|-------------|------------|
| 215   | 28.74332 | 4.37E-10 | S100A6, FA | 728        | 4534     | 22680     | 1.4773      | 1.48E-07   |
| 92    | 12.29947 | 3.27E-05 | AKNA, ELF1 | 728        | 1859     | 22680     | 1.541772    | 0.011004   |
| 86    | 11.49733 | 1.92E-04 | AKNA, ELF1 | 728        | 1799     | 22680     | 1.489289    | 0.062964   |
| 92    | 12.29947 | 0.003254 | AKNA, ELF1 | 661        | 1885     | 18082     | 1.335124    | 0.99991    |
| 49    | 6.550802 | 0.004395 | DEAF1, ZFP | 642        | 883      | 17446     | 1.507982    | 0.978435   |
| 71    | 9.491979 | 0.005283 | AKNA, ELF1 | 728        | 1604     | 22680     | 1.379004    | 0.833089   |
| 85    | 11.36364 | 0.023084 | AKNA, ELF1 | 642        | 1847     | 17446     | 1.250584    | 1          |
| 100   | 13.36898 | 0.035546 | AKNA, CDK  | 661        | 2279     | 18082     | 1.20033     | 1          |

| Count | %        | PValue   | Genes       | List Total | Pop Hits | Pop Total | Fold Enrich | Bonferroni |
|-------|----------|----------|-------------|------------|----------|-----------|-------------|------------|
| 57    | 7.620321 | 1.36E-05 | SEPT3, SLFI | 702        | 909      | 20594     | 1.839563    | 0.017792   |
| 29    | 3.877005 | 4.50E-04 | ADSS, RAB   | 642        | 383      | 17446     | 2.057596    | 0.324465   |
| 24    | 3.208556 | 4.78E-04 | RAP2B, GBI  | 728        | 332      | 22680     | 2.252085    | 0.149278   |
| 19    | 2.540107 | 7.29E-04 | GBP7, RAB   | 642        | 209      | 17446     | 2.470405    | 0.469985   |
| 20    | 2.673797 | 0.019127 | RAP2B, AD   | 638        | 319      | 18012     | 1.77003     | 1          |

| Count | %        | PValue   | Genes      | List Total | Pop Hits | Pop Total | Fold Enrich | Bonferroni |
|-------|----------|----------|------------|------------|----------|-----------|-------------|------------|
| 9     | 1.203209 | 2.24E-05 | WARS, DAF  | 728        | 38       | 22680     | 7.378543    | 0.00753    |
| 9     | 1.203209 | 7.13E-05 | WARS, DAF  | 642        | 39       | 17446     | 6.271028    | 0.060208   |
| 8     | 1.069519 | 2.77E-04 | WARS, DAF  | 661        | 36       | 18082     | 6.079005    | 0.547179   |
| 10    | 1.336898 | 7.05E-04 | WARS, DAF  | 289        | 66       | 7720      | 4.047394    | 0.161016   |
| 23    | 3.074866 | 0.00105  | DTX4, ADS  | 728        | 330      | 22680     | 2.171329    | 0.298772   |
| 5     | 0.668449 | 0.002553 | WARS, RAR  | 638        | 17       | 18012     | 8.303522    | 0.984056   |
| 13    | 1.737968 | 0.002803 | WARS, EIF4 | 728        | 147      | 22680     | 2.755102    | 0.612727   |
| 7     | 0.935829 | 0.00357  | WARS, TRM  | 702        | 44       | 20594     | 4.66712     | 0.991128   |
| 24    | 3.208556 | 0.00809  | DTX4, ADS  | 642        | 362      | 17446     | 1.801621    | 0.999154   |
| 4     | 0.534759 | 0.013159 | WARS, RAR  | 702        | 15       | 20594     | 7.822982    | 1          |
| 4     | 0.534759 | 0.014579 | WARS, EPR  | 638        | 15       | 18012     | 7.528527    | 1          |
| 4     | 0.534759 | 0.018701 | DARS, SAR  | 702        | 17       | 20594     | 6.902631    | 1          |
| 3     | 0.40107  | 0.028268 | SARS, EPRS | 702        | 8        | 20594     | 11.00107    | 1          |
| 23    | 3.074866 | 0.038206 | DARS, SAR  | 661        | 401      | 18082     | 1.56902     | 1          |
| 3     | 0.40107  | 0.070421 | RARS, MAR  | 702        | 13       | 20594     | 6.769888    | 1          |

| Count | %        | PValue   | Genes      | List Total | Pop Hits | Pop Total | Fold Enrich | Bonferroni |
|-------|----------|----------|------------|------------|----------|-----------|-------------|------------|
| 6     | 0.802139 | 1.44E-04 | PARP9, ZC3 | 702        | 16       | 20594     | 11.00107    | 0.173185   |
| 5     | 0.668449 | 4.19E-04 | PARP9, ZC3 | 638        | 11       | 18012     | 12.83272    | 0.492824   |
| 5     | 0.668449 | 5.30E-04 | DTX4, ZC3  | 702        | 12       | 20594     | 12.22341    | 0.503282   |
| 6     | 0.802139 | 8.22E-04 | PARP9, ZC3 | 642        | 21       | 17446     | 7.76413     | 0.511369   |
| 3     | 0.40107  | 0.023301 | ZC3HAV1, F | 638        | 7        | 18012     | 12.09942    | 1          |
| 12    | 1.604278 | 0.034217 | XDH, CYB5I | 728        | 183      | 22680     | 2.042875    | 0.999992   |
| 5     | 0.668449 | 0.140954 | ZC3H3, ZC3 | 702        | 59       | 20594     | 2.486117    | 1          |



| Count | %        | PValue   | Genes      | List Total | Pop Hits | Pop Total | Fold Enrich | Bonferroni |
|-------|----------|----------|------------|------------|----------|-----------|-------------|------------|
| 51    | 6.818182 | 0.001252 | JPH4, HPS6 | 728        | 997      | 22680     | 1.593627    | 0.345243   |
| 64    | 8.55615  | 0.009397 | JPH4, SLC2 | 695        | 1323     | 19662     | 1.368557    | 0.988393   |
| 37    | 4.946524 | 0.019537 | JPH4, ERMI | 695        | 710      | 19662     | 1.474301    | 0.99991    |

| Count | %        | PValue   | Genes       | List Total | Pop Hits | Pop Total | Fold Enrich | Bonferroni |
|-------|----------|----------|-------------|------------|----------|-----------|-------------|------------|
| 6     | 0.802139 | 2.05E-04 | IRF9, IRF5, | 642        | 16       | 17446     | 10.19042    | 0.163889   |
| 4     | 0.534759 | 0.002829 | IRF9, IRF5, | 702        | 9        | 20594     | 13.0383     | 0.976296   |
| 4     | 0.534759 | 0.002829 | IRF9, IRF5, | 702        | 9        | 20594     | 13.0383     | 0.976296   |
| 4     | 0.534759 | 0.002914 | IRF9, IRF5, | 360        | 9        | 10425     | 12.87037    | 0.56974    |
| 4     | 0.534759 | 0.003152 | IRF9, IRF5, | 638        | 9        | 18012     | 12.54754    | 0.993974   |
| 4     | 0.534759 | 0.013159 | IRF9, SMAE  | 702        | 15       | 20594     | 7.822982    | 1          |
| 3     | 0.40107  | 0.021685 | IRF9, IRF5, | 702        | 7        | 20594     | 12.57265    | 1          |
| 3     | 0.40107  | 0.022142 | IRF9, IRF5, | 360        | 7        | 10425     | 12.41071    | 0.998452   |
| 5     | 0.668449 | 0.100302 | IRF9, SMAE  | 702        | 52       | 20594     | 2.820787    | 1          |
| 11    | 1.470588 | 0.245804 | IRF9, ELF1, | 702        | 227      | 20594     | 1.421577    | 1          |

| Count | %        | PValue   | Genes       | List Total | Pop Hits | Pop Total | Fold Enrich | Bonferroni |
|-------|----------|----------|-------------|------------|----------|-----------|-------------|------------|
| 28    | 3.743316 | 0.002877 | CBLL1, RNF  | 702        | 445      | 20594     | 1.845872    | 0.977749   |
| 18    | 2.406417 | 0.003012 | DTX4, DTXE  | 360        | 234      | 10425     | 2.227564    | 0.581747   |
| 19    | 2.540107 | 0.009404 | DTX4, DTXE  | 702        | 286      | 20594     | 1.948907    | 0.999996   |
| 12    | 1.604278 | 0.023917 | TRIM65, TF  | 702        | 163      | 20594     | 2.159719    | 1          |
| 13    | 1.737968 | 0.033028 | DTX3L, TRII | 638        | 186      | 18012     | 1.973203    | 1          |

| Count | %        | PValue   | Genes       | List Total | Pop Hits | Pop Total | Fold Enrich | Bonferroni |
|-------|----------|----------|-------------|------------|----------|-----------|-------------|------------|
| 36    | 4.812834 | 0.002316 | DEAF1, ELF  | 661        | 576      | 18082     | 1.70972     | 0.998678   |
| 54    | 7.219251 | 0.003713 | AKNA, NAM   | 661        | 995      | 18082     | 1.484621    | 0.999976   |
| 49    | 6.550802 | 0.004395 | DEAF1, ZFP  | 642        | 883      | 17446     | 1.507982    | 0.978435   |
| 26    | 3.475936 | 0.150326 | AKNA, TRP!  | 728        | 624      | 22680     | 1.298077    | 1          |
| 28    | 3.743316 | 0.238046 | ELF1, ZFP1: | 642        | 633      | 17446     | 1.20203     | 1          |

| Count | %        | PValue   | Genes       | List Total | Pop Hits | Pop Total | Fold Enrich | Bonferroni |
|-------|----------|----------|-------------|------------|----------|-----------|-------------|------------|
| 4     | 0.534759 | 0.002147 | GBP7, IIGP: | 695        | 8        | 19662     | 14.14532    | 0.637351   |
| 4     | 0.534759 | 0.010797 | GBP7, GBP!  | 702        | 14       | 20594     | 8.381766    | 0.999999   |
| 8     | 1.069519 | 0.011807 | GBP7, GBP!  | 661        | 68       | 18082     | 3.218297    | 1          |
| 4     | 0.534759 | 0.013159 | GBP7, GBP!  | 702        | 15       | 20594     | 7.822982    | 1          |
| 5     | 0.668449 | 0.022694 | GBP7, IRGM  | 661        | 30       | 18082     | 4.559254    | 1          |
| 3     | 0.40107  | 0.040392 | GBP7, GBP!  | 661        | 9        | 18082     | 9.118507    | 1          |
| 6     | 0.802139 | 0.252358 | GBP7, P2R)  | 661        | 93       | 18082     | 1.764872    | 1          |

| Count | %        | PValue   | Genes      | List Total | Pop Hits | Pop Total | Fold Enrich | Bonferroni |
|-------|----------|----------|------------|------------|----------|-----------|-------------|------------|
| 94    | 12.56684 | 1.03E-06 | SLC27A1, S | 728        | 1754     | 22680     | 1.66959     | 3.49E-04   |
| 85    | 11.36364 | 1.83E-05 | NAMPT, SE  | 728        | 1654     | 22680     | 1.601014    | 0.006153   |
| 69    | 9.224599 | 1.99E-04 | SEPHS2, PA | 728        | 1363     | 22680     | 1.577121    | 0.065028   |
| 81    | 10.82888 | 2.43E-04 | NAMPT, SE  | 642        | 1472     | 17446     | 1.495333    | 0.191094   |

|    |          |          |             |     |      |       |          |          |
|----|----------|----------|-------------|-----|------|-------|----------|----------|
| 81 | 10.82888 | 5.00E-04 | SEPHS2, PA  | 642 | 1507 | 17446 | 1.460604 | 0.353357 |
| 91 | 12.16578 | 0.01128  | SLC27A1, S  | 642 | 1936 | 17446 | 1.277312 | 0.999949 |
| 14 | 1.871658 | 0.016972 | HTATIP2, FI | 661 | 183  | 18082 | 2.092772 | 1        |
| 37 | 4.946524 | 0.019522 | XDH, ME3,   | 638 | 710  | 18012 | 1.471244 | 1        |
| 34 | 4.545455 | 0.020712 | SEPHS2, PF  | 728 | 707  | 22680 | 1.498205 | 0.999153 |
| 46 | 6.149733 | 0.033853 | SEPHS2, TD  | 638 | 963  | 18012 | 1.348568 | 1        |
| 28 | 3.743316 | 0.056138 | FASTKD2, P  | 642 | 531  | 17446 | 1.432928 | 1        |
| 30 | 4.010695 | 0.092757 | SEPHS2, PA  | 661 | 612  | 18082 | 1.340957 | 1        |
| 28 | 3.743316 | 0.110617 | PASK, MAP   | 661 | 576  | 18082 | 1.329782 | 1        |
| 24 | 3.208556 | 0.112533 | FLT1, FLT3, | 702 | 515  | 20594 | 1.367123 | 1        |
| 32 | 4.278075 | 0.116792 | SEPHS2, PA  | 642 | 674  | 17446 | 1.290182 | 1        |
| 24 | 3.208556 | 0.124571 | FLT1, FLT3, | 638 | 502  | 18012 | 1.349736 | 1        |
| 27 | 3.609626 | 0.132074 | PASK, MAP   | 638 | 583  | 18012 | 1.307484 | 1        |
| 25 | 3.342246 | 0.137763 | PASK, MAP   | 702 | 556  | 20594 | 1.319073 | 1        |
| 17 | 2.272727 | 0.270025 | FLT1, FLT3, | 702 | 394  | 20594 | 1.265774 | 1        |
| 15 | 2.005348 | 0.424379 | STK24, PNC  | 728 | 405  | 22680 | 1.153846 | 1        |
| 17 | 2.272727 | 0.509161 | HTATIP2, S  | 642 | 428  | 17446 | 1.079359 | 1        |
| 14 | 1.871658 | 0.550561 | STK24, PNC  | 360 | 380  | 10425 | 1.066886 | 1        |
| 10 | 1.336898 | 0.803244 | MAP3K15,    | 702 | 333  | 20594 | 0.880966 | 1        |

| Count | %       | PValue   | Genes     | List Total | Pop Hits | Pop Total | Fold Enrich | Bonferroni |
|-------|---------|----------|-----------|------------|----------|-----------|-------------|------------|
| 3     | 0.40107 | 0.015844 | MX1, MX2, | 702        | 6        | 20594     | 14.66809    | 1          |
| 3     | 0.40107 | 0.015844 | MX1, MX2, | 702        | 6        | 20594     | 14.66809    | 1          |
| 3     | 0.40107 | 0.015844 | MX1, MX2, | 702        | 6        | 20594     | 14.66809    | 1          |
| 3     | 0.40107 | 0.016181 | MX1, MX2, | 360        | 6        | 10425     | 14.47917    | 0.991036   |
| 3     | 0.40107 | 0.017039 | MX1, MX2, | 638        | 6        | 18012     | 14.11599    | 1          |
| 3     | 0.40107 | 0.021685 | MX1, MX2, | 702        | 7        | 20594     | 12.57265    | 1          |
| 3     | 0.40107 | 0.021685 | MX1, MX2, | 702        | 7        | 20594     | 12.57265    | 1          |
| 3     | 0.40107 | 0.022142 | MX1, MX2, | 360        | 7        | 10425     | 12.41071    | 0.998452   |
| 3     | 0.40107 | 0.090696 | MX1, MX2, | 702        | 15       | 20594     | 5.867236    | 1          |

| Count | %        | PValue   | Genes      | List Total | Pop Hits | Pop Total | Fold Enrich | Bonferroni |
|-------|----------|----------|------------|------------|----------|-----------|-------------|------------|
| 25    | 3.342246 | 0.009083 | RAP2B, DEI | 728        | 443      | 22680     | 1.758118    | 0.954226   |
| 30    | 4.010695 | 0.018554 | SNX19, CCI | 695        | 544      | 19662     | 1.560146    | 0.999855   |
| 13    | 1.737968 | 0.104627 | SH3GL3, AI | 695        | 226      | 19662     | 1.627338    | 1          |

| Count | %       | PValue   | Genes      | List Total | Pop Hits | Pop Total | Fold Enrich | Bonferroni |
|-------|---------|----------|------------|------------|----------|-----------|-------------|------------|
| 3     | 0.40107 | 0.023301 | DEAF1, SP1 | 638        | 7        | 18012     | 12.09942    | 1          |
| 3     | 0.40107 | 0.028268 | DEAF1, SP1 | 702        | 8        | 20594     | 11.00107    | 1          |
| 3     | 0.40107 | 0.028858 | DEAF1, SP1 | 360        | 8        | 10425     | 10.85938    | 0.999789   |
| 3     | 0.40107 | 0.060925 | DEAF1, SP1 | 702        | 12       | 20594     | 7.334046    | 1          |

| Count | %       | PValue   | Genes      | List Total | Pop Hits | Pop Total | Fold Enrich | Bonferroni |
|-------|---------|----------|------------|------------|----------|-----------|-------------|------------|
| 3     | 0.40107 | 0.021685 | APOBEC1, J | 702        | 7        | 20594     | 12.57265    | 1          |
| 3     | 0.40107 | 0.043436 | APOBEC1, J | 702        | 10       | 20594     | 8.800855    | 1          |
| 3     | 0.40107 | 0.043436 | APOBEC1, J | 702        | 10       | 20594     | 8.800855    | 1          |

| Count | %        | PValue   | Genes       | List Total | Pop Hits | Pop Total | Fold Enrich | Bonferroni |
|-------|----------|----------|-------------|------------|----------|-----------|-------------|------------|
| 21    | 2.807487 | 0.001416 | ZFP710, ZFI | 638        | 268      | 18012     | 2.212207    | 0.899157   |
| 20    | 2.673797 | 0.002636 | ZFP710, ZFI | 638        | 263      | 18012     | 2.146918    | 0.986073   |
| 18    | 2.406417 | 0.011753 | ZFP710, ZFI | 638        | 261      | 18012     | 1.947033    | 1          |
| 34    | 4.545455 | 0.032992 | ZFP358, ZFI | 702        | 693      | 20594     | 1.439293    | 1          |
| 34    | 4.545455 | 0.03607  | ZFP358, ZFI | 360        | 693      | 10425     | 1.420755    | 0.999975   |
| 35    | 4.679144 | 0.041343 | ZFP358, ZFI | 702        | 731      | 20594     | 1.404605    | 1          |
| 13    | 1.737968 | 0.043339 | ZFP710, ZFI | 638        | 194      | 18012     | 1.891833    | 1          |
| 31    | 4.144385 | 0.058659 | ZFP358, ZFI | 702        | 652      | 20594     | 1.394818    | 1          |
| 13    | 1.737968 | 0.080804 | ZFP710, ZFI | 638        | 215      | 18012     | 1.70705     | 1          |
| 8     | 1.069519 | 0.172872 | ZFP710, ZFI | 638        | 129      | 18012     | 1.75082     | 1          |
| 8     | 1.069519 | 0.292308 | ZFP710, ZFI | 638        | 152      | 18012     | 1.485893    | 1          |
| 46    | 6.149733 | 0.551106 | ZFP358, ZFI | 642        | 1237     | 17446     | 1.010529    | 1          |

| Count | %        | PValue   | Genes      | List Total | Pop Hits | Pop Total | Fold Enrich | Bonferroni |
|-------|----------|----------|------------|------------|----------|-----------|-------------|------------|
| 12    | 1.604278 | 0.018287 | PLA2G4A, / | 695        | 151      | 19662     | 2.248263    | 0.999835   |
| 32    | 4.278075 | 0.053122 | SNX19, SLC | 695        | 646      | 19662     | 1.401394    | 1          |
| 23    | 3.074866 | 0.070594 | SNX19, FM  | 728        | 489      | 22680     | 1.465314    | 1          |

| Count | %        | PValue   | Genes      | List Total | Pop Hits | Pop Total | Fold Enrich | Bonferroni |
|-------|----------|----------|------------|------------|----------|-----------|-------------|------------|
| 30    | 4.010695 | 0.011856 | SNX19, AFT | 728        | 577      | 22680     | 1.619784    | 0.982249   |
| 76    | 10.16043 | 0.035296 | SLC27A1, S | 728        | 1901     | 22680     | 1.245498    | 0.999995   |
| 31    | 4.144385 | 0.04486  | SNX19, AFT | 661        | 592      | 18082     | 1.432468    | 1          |
| 75    | 10.02674 | 0.179994 | SLC27A1, C | 661        | 1822     | 18082     | 1.126051    | 1          |

| Count | %        | PValue   | Genes       | List Total | Pop Hits | Pop Total | Fold Enrich | Bonferroni |
|-------|----------|----------|-------------|------------|----------|-----------|-------------|------------|
| 3     | 0.40107  | 0.003393 | DDX58, IFIH | 702        | 3        | 20594     | 29.33618    | 0.988771   |
| 11    | 1.470588 | 0.009148 | DDX58, REC  | 728        | 130      | 22680     | 2.636095    | 0.955224   |
| 8     | 1.069519 | 0.012956 | DDX58, IFIH | 289        | 68       | 7720      | 3.142683    | 0.961111   |
| 11    | 1.470588 | 0.020642 | DDX58, REC  | 642        | 129      | 17446     | 2.317202    | 1          |
| 3     | 0.40107  | 0.028268 | DDX58, IFIH | 702        | 8        | 20594     | 11.00107    | 1          |
| 9     | 1.203209 | 0.032672 | DDX58, REC  | 360        | 108      | 10425     | 2.413194    | 0.999932   |
| 9     | 1.203209 | 0.03268  | DDX58, REC  | 702        | 109      | 20594     | 2.422254    | 1          |
| 9     | 1.203209 | 0.035845 | DDX58, REC  | 702        | 111      | 20594     | 2.378609    | 1          |
| 9     | 1.203209 | 0.035876 | DDX58, REC  | 360        | 110      | 10425     | 2.369318    | 0.999974   |
| 8     | 1.069519 | 0.058746 | DDX58, REC  | 638        | 98       | 18012     | 2.304651    | 1          |
| 3     | 0.40107  | 0.059514 | DDX58, IFIH | 642        | 11       | 17446     | 7.411215    | 1          |
| 5     | 0.668449 | 0.067351 | DDX58, IFIH | 642        | 42       | 17446     | 3.235054    | 1          |
| 4     | 0.534759 | 0.082025 | RECQL4, DI  | 642        | 28       | 17446     | 3.882065    | 1          |
| 6     | 0.802139 | 0.085723 | DDX58, REC  | 702        | 69       | 20594     | 2.550972    | 1          |
| 4     | 0.534759 | 0.11769  | RECQL4, TE  | 638        | 34       | 18012     | 3.321409    | 1          |
| 7     | 0.935829 | 0.120176 | DDX58, REC  | 638        | 95       | 18012     | 2.080251    | 1          |
| 5     | 0.668449 | 0.321078 | DDX58, IFIH | 88         | 70       | 2126      | 1.725649    | 0.999938   |
| 3     | 0.40107  | 0.678687 | DDX18, TDI  | 642        | 63       | 17446     | 1.294022    | 1          |

| Count | %        | PValue   | Genes      | List Total | Pop Hits | Pop Total | Fold Enrich | Bonferroni |
|-------|----------|----------|------------|------------|----------|-----------|-------------|------------|
| 3     | 0.40107  | 0.043436 | TXNIP, ARR | 702        | 10       | 20594     | 8.800855    | 1          |
| 3     | 0.40107  | 0.043436 | TXNIP, ARR | 702        | 10       | 20594     | 8.800855    | 1          |
| 3     | 0.40107  | 0.044324 | TXNIP, ARR | 360        | 10       | 10425     | 8.6875      | 0.999998   |
| 7     | 0.935829 | 0.177612 | TXNIP, ARR | 702        | 111      | 20594     | 1.85003     | 1          |

| Count | %        | PValue   | Genes      | List Total | Pop Hits | Pop Total | Fold Enrich | Bonferroni |
|-------|----------|----------|------------|------------|----------|-----------|-------------|------------|
| 8     | 1.069519 | 0.041822 | PLA2G4A, F | 728        | 100      | 22680     | 2.492308    | 0.999999   |
| 5     | 0.668449 | 0.080347 | PLA2G4A, C | 289        | 44       | 7720      | 3.035546    | 1          |
| 8     | 1.069519 | 0.103919 | PLA2G4A, F | 661        | 109      | 18082     | 2.007745    | 1          |

| Count | %        | PValue   | Genes      | List Total | Pop Hits | Pop Total | Fold Enrich | Bonferroni |
|-------|----------|----------|------------|------------|----------|-----------|-------------|------------|
| 8     | 1.069519 | 0.020793 | GLUL, OSR2 | 661        | 76       | 18082     | 2.879529    | 1          |
| 7     | 0.935829 | 0.03304  | MKS1, OSR  | 661        | 66       | 18082     | 2.901343    | 1          |
| 5     | 0.668449 | 0.041152 | ZFP358, OS | 661        | 36       | 18082     | 3.799378    | 1          |
| 4     | 0.534759 | 0.074046 | OSR2, OSR  | 661        | 27       | 18082     | 4.05267     | 1          |
| 6     | 0.802139 | 0.198921 | OSR2, OSR  | 661        | 85       | 18082     | 1.930978    | 1          |
| 3     | 0.40107  | 0.34041  | OSR2, OSR  | 661        | 33       | 18082     | 2.486866    | 1          |

| Count | %        | PValue   | Genes       | List Total | Pop Hits | Pop Total | Fold Enrich | Bonferroni |
|-------|----------|----------|-------------|------------|----------|-----------|-------------|------------|
| 10    | 1.336898 | 0.021493 | IFIT3, TRAP | 702        | 120      | 20594     | 2.444682    | 1          |
| 10    | 1.336898 | 0.021538 | IFIT3, TRAP | 360        | 119      | 10425     | 2.433473    | 0.99815    |
| 10    | 1.336898 | 0.028374 | IFIT3, TRAP | 702        | 126      | 20594     | 2.328268    | 1          |
| 8     | 1.069519 | 0.032516 | IFIT3, TRAP | 638        | 86       | 18012     | 2.62623     | 1          |
| 10    | 1.336898 | 0.033406 | IFIT3, TRAP | 638        | 125      | 18012     | 2.258558    | 1          |
| 10    | 1.336898 | 0.042574 | IFIT3, TRAP | 728        | 144      | 22680     | 2.163462    | 1          |
| 10    | 1.336898 | 0.054399 | IFIT3, TRAP | 638        | 137      | 18012     | 2.060728    | 1          |
| 10    | 1.336898 | 0.054399 | IFIT3, TRAP | 638        | 137      | 18012     | 2.060728    | 1          |
| 11    | 1.470588 | 0.159247 | IFIT3, TRAP | 702        | 204      | 20594     | 1.581853    | 1          |
| 5     | 0.668449 | 0.190256 | RPAP3, IFIT | 638        | 64       | 18012     | 2.205623    | 1          |
| 4     | 0.534759 | 0.269274 | RPAP3, IFIT | 638        | 51       | 18012     | 2.214273    | 1          |
| 4     | 0.534759 | 0.327646 | RPAP3, IFIT | 638        | 57       | 18012     | 1.981191    | 1          |
| 3     | 0.40107  | 0.403475 | IFIT1, TTC3 | 638        | 39       | 18012     | 2.17169     | 1          |

| Count | %        | PValue   | Genes      | List Total | Pop Hits | Pop Total | Fold Enrich | Bonferroni |
|-------|----------|----------|------------|------------|----------|-----------|-------------|------------|
| 5     | 0.668449 | 0.028132 | APOBEC1, I | 661        | 32       | 18082     | 4.2743      | 1          |
| 3     | 0.40107  | 0.070421 | APOL9A, AI | 702        | 13       | 20594     | 6.769888    | 1          |
| 7     | 0.935829 | 0.219655 | SLC27A1, S | 661        | 111      | 18082     | 1.725123    | 1          |

| Count | %        | PValue   | Genes        | List Total | Pop Hits | Pop Total | Fold Enrich | Bonferroni |
|-------|----------|----------|--------------|------------|----------|-----------|-------------|------------|
| 5     | 0.668449 | 0.007747 | ADI1, PYCR   | 728        | 25       | 22680     | 6.230769    | 0.927831   |
| 5     | 0.668449 | 0.012084 | ADI1, PYCR   | 661        | 25       | 18082     | 5.471104    | 1          |
| 5     | 0.668449 | 0.060594 | ADI1, TST, I | 289        | 40       | 7720      | 3.3391      | 1          |
| 5     | 0.668449 | 0.125974 | ODC1, CTH    | 728        | 60       | 22680     | 2.596154    | 1          |

|   |          |          |            |     |    |       |          |   |
|---|----------|----------|------------|-----|----|-------|----------|---|
| 6 | 0.802139 | 0.165461 | RPE, PYCR2 | 289 | 78 | 7720  | 2.054831 | 1 |
| 3 | 0.40107  | 0.432814 | CTH, GOT1, | 702 | 43 | 20594 | 2.04671  | 1 |
| 3 | 0.40107  | 0.432814 | CTH, GOT1, | 702 | 43 | 20594 | 2.04671  | 1 |

| Count | %        | PValue   | Genes      | List Total | Pop Hits | Pop Total | Fold Enrich | Bonferroni |
|-------|----------|----------|------------|------------|----------|-----------|-------------|------------|
| 11    | 1.470588 | 0.010648 | DENND6B,   | 728        | 133      | 22680     | 2.576634    | 0.973172   |
| 13    | 1.737968 | 0.01261  | DENND6B,   | 642        | 156      | 17446     | 2.264538    | 0.999984   |
| 7     | 0.935829 | 0.054393 | ARHGEF3, S | 642        | 74       | 17446     | 2.570557    | 1          |
| 5     | 0.668449 | 0.185036 | ARHGEF3, S | 360        | 65       | 10425     | 2.227564    | 1          |
| 3     | 0.40107  | 0.196064 | ARHGEF3, I | 702        | 24       | 20594     | 3.667023    | 1          |
| 5     | 0.668449 | 0.200925 | ARHGEF3, S | 702        | 68       | 20594     | 2.157072    | 1          |
| 5     | 0.668449 | 0.309477 | ARHGEF3, S | 661        | 77       | 18082     | 1.776333    | 1          |
| 4     | 0.534759 | 0.347156 | ARHGEF3, S | 638        | 59       | 18012     | 1.914032    | 1          |

| Count | %        | PValue   | Genes      | List Total | Pop Hits | Pop Total | Fold Enrich | Bonferroni |
|-------|----------|----------|------------|------------|----------|-----------|-------------|------------|
| 4     | 0.534759 | 0.01748  | ANKRD27, A | 638        | 16       | 18012     | 7.057994    | 1          |
| 3     | 0.40107  | 0.023301 | ANKRD28, A | 638        | 7        | 18012     | 12.09942    | 1          |
| 3     | 0.40107  | 0.023301 | ANKRD28, A | 638        | 7        | 18012     | 12.09942    | 1          |
| 3     | 0.40107  | 0.023301 | ANKRD28, A | 638        | 7        | 18012     | 12.09942    | 1          |
| 3     | 0.40107  | 0.023301 | ANKRD28, A | 638        | 7        | 18012     | 12.09942    | 1          |
| 3     | 0.40107  | 0.023301 | ANKRD28, A | 638        | 7        | 18012     | 12.09942    | 1          |
| 3     | 0.40107  | 0.030349 | ANKRD28, A | 638        | 8        | 18012     | 10.58699    | 1          |
| 3     | 0.40107  | 0.030349 | ANKRD28, A | 638        | 8        | 18012     | 10.58699    | 1          |
| 3     | 0.40107  | 0.038119 | ANKRD28, A | 638        | 9        | 18012     | 9.410658    | 1          |
| 3     | 0.40107  | 0.038119 | ANKRD28, A | 638        | 9        | 18012     | 9.410658    | 1          |
| 3     | 0.40107  | 0.046553 | ANKRD28, A | 638        | 10       | 18012     | 8.469592    | 1          |
| 5     | 0.668449 | 0.048    | ANKRD27, A | 638        | 39       | 18012     | 3.619484    | 1          |
| 4     | 0.534759 | 0.051341 | ANKRD27, A | 638        | 24       | 18012     | 4.705329    | 1          |
| 5     | 0.668449 | 0.117202 | ANKRD27, A | 638        | 53       | 18012     | 2.663394    | 1          |
| 4     | 0.534759 | 0.11769  | ANKRD27, A | 638        | 34       | 18012     | 3.321409    | 1          |
| 6     | 0.802139 | 0.142034 | ANKRD27, A | 638        | 78       | 18012     | 2.17169     | 1          |
| 6     | 0.802139 | 0.33515  | ANKRD27, A | 638        | 108      | 18012     | 1.568443    | 1          |
| 6     | 0.802139 | 0.468251 | ANKRD27, A | 638        | 127      | 18012     | 1.333794    | 1          |
| 9     | 1.203209 | 0.504308 | ANKRD27, A | 728        | 240      | 22680     | 1.168269    | 1          |
| 9     | 1.203209 | 0.526569 | ANKRD27, A | 360        | 225      | 10425     | 1.158333    | 1          |
| 9     | 1.203209 | 0.533569 | ANKRD27, A | 702        | 232      | 20594     | 1.138042    | 1          |
| 9     | 1.203209 | 0.583544 | ANKRD27, A | 702        | 242      | 20594     | 1.091015    | 1          |
| 6     | 0.802139 | 0.672181 | ANKRD27, A | 638        | 160      | 18012     | 1.058699    | 1          |
| 7     | 0.935829 | 0.682175 | ANKRD27, A | 638        | 193      | 18012     | 1.023958    | 1          |
| 7     | 0.935829 | 0.682175 | ANKRD27, A | 638        | 193      | 18012     | 1.023958    | 1          |

| Count | %        | PValue   | Genes     | List Total | Pop Hits | Pop Total | Fold Enrich | Bonferroni |
|-------|----------|----------|-----------|------------|----------|-----------|-------------|------------|
| 5     | 0.668449 | 0.005469 | MGST3, PR | 642        | 20       | 17446     | 6.793614    | 0.991577   |
| 7     | 0.935829 | 0.015995 | MGST3, OC | 289        | 55       | 7720      | 3.399811    | 0.981955   |
| 4     | 0.534759 | 0.119775 | MGST3, GS | 642        | 33       | 17446     | 3.293873    | 1          |
| 4     | 0.534759 | 0.429347 | MGST3, GS | 289        | 64       | 7720      | 1.66955     | 1          |
| 4     | 0.534759 | 0.449193 | MGST3, GS | 289        | 66       | 7720      | 1.618958    | 1          |

|   |          |          |           |     |    |      |          |   |
|---|----------|----------|-----------|-----|----|------|----------|---|
| 4 | 0.534759 | 0.673214 | MGST3, GS | 289 | 92 | 7720 | 1.161426 | 1 |
|---|----------|----------|-----------|-----|----|------|----------|---|

| Count | %        | PValue   | Genes      | List Total | Pop Hits | Pop Total | Fold Enrich | Bonferroni |
|-------|----------|----------|------------|------------|----------|-----------|-------------|------------|
| 23    | 3.074866 | 0.057658 | TRP53, RBE | 661        | 420      | 18082     | 1.49804     | 1          |
| 15    | 2.005348 | 0.066514 | REV1, POLI | 728        | 279      | 22680     | 1.674938    | 1          |
| 16    | 2.139037 | 0.124371 | POLI, REV1 | 728        | 336      | 22680     | 1.483516    | 1          |
| 15    | 2.005348 | 0.273729 | REV1, POLI | 661        | 318      | 18082     | 1.290355    | 1          |

| Count | %        | PValue   | Genes      | List Total | Pop Hits | Pop Total | Fold Enrich | Bonferroni |
|-------|----------|----------|------------|------------|----------|-----------|-------------|------------|
| 6     | 0.802139 | 0.048363 | SOAT1, SOA | 728        | 62       | 22680     | 3.014888    | 1          |
| 7     | 0.935829 | 0.086444 | SOAT1, SOA | 661        | 84       | 18082     | 2.279627    | 1          |
| 6     | 0.802139 | 0.088782 | SOAT1, SOA | 728        | 74       | 22680     | 2.525988    | 1          |
| 5     | 0.668449 | 0.09941  | SOAT1, SOA | 728        | 55       | 22680     | 2.832168    | 1          |
| 7     | 0.935829 | 0.106663 | CEBPA, SOA | 661        | 89       | 18082     | 2.151558    | 1          |
| 4     | 0.534759 | 0.405422 | SOAT1, SOA | 661        | 63       | 18082     | 1.736859    | 1          |

| Count | %       | PValue   | Genes      | List Total | Pop Hits | Pop Total | Fold Enrich | Bonferroni |
|-------|---------|----------|------------|------------|----------|-----------|-------------|------------|
| 3     | 0.40107 | 0.01936  | RBP1, CRAI | 728        | 7        | 22680     | 13.35165    | 0.99865    |
| 3     | 0.40107 | 0.02527  | RBP1, CRAI | 728        | 8        | 22680     | 11.68269    | 0.999825   |
| 3     | 0.40107 | 0.032577 | RBP1, CRAI | 642        | 8        | 17446     | 10.19042    | 1          |
| 3     | 0.40107 | 0.059514 | RBP1, CRAI | 642        | 11       | 17446     | 7.411215    | 1          |
| 3     | 0.40107 | 0.069722 | RBP1, CRAI | 642        | 12       | 17446     | 6.793614    | 1          |
| 3     | 0.40107 | 0.101397 | RBP1, CRAI | 702        | 16       | 20594     | 5.500534    | 1          |
| 3     | 0.40107 | 0.654012 | RBP1, CRAI | 702        | 65       | 20594     | 1.353978    | 1          |
| 3     | 0.40107 | 0.708287 | RBP1, CRAI | 702        | 72       | 20594     | 1.222341    | 1          |
| 3     | 0.40107 | 0.715431 | RBP1, CRAI | 702        | 73       | 20594     | 1.205597    | 1          |

| Count | %        | PValue   | Genes      | List Total | Pop Hits | Pop Total | Fold Enrich | Bonferroni |
|-------|----------|----------|------------|------------|----------|-----------|-------------|------------|
| 4     | 0.534759 | 0.05065  | HTRA1, IGF | 642        | 23       | 17446     | 4.725992    | 1          |
| 6     | 0.802139 | 0.059991 | HSD3B7, H  | 661        | 58       | 18082     | 2.829882    | 1          |
| 5     | 0.668449 | 0.067351 | FLT1, HTRA | 642        | 42       | 17446     | 3.235054    | 1          |
| 3     | 0.40107  | 0.081805 | HTRA1, IGF | 728        | 15       | 22680     | 6.230769    | 1          |
| 3     | 0.40107  | 0.131738 | HTRA1, IGF | 638        | 18       | 18012     | 4.705329    | 1          |
| 3     | 0.40107  | 0.137832 | HTRA1, IGF | 360        | 19       | 10425     | 4.572368    | 1          |
| 3     | 0.40107  | 0.14712  | HTRA1, IGF | 702        | 20       | 20594     | 4.400427    | 1          |
| 5     | 0.668449 | 0.64995  | HTRA1, IGF | 702        | 130      | 20594     | 1.128315    | 1          |

| Count | %        | PValue   | Genes      | List Total | Pop Hits | Pop Total | Fold Enrich | Bonferroni |
|-------|----------|----------|------------|------------|----------|-----------|-------------|------------|
| 4     | 0.534759 | 0.079567 | RPGR, HERC | 88         | 25       | 2126      | 3.865455    | 0.874163   |
| 3     | 0.40107  | 0.135316 | RPGR, HERC | 702        | 19       | 20594     | 4.632029    | 1          |
| 3     | 0.40107  | 0.14712  | RPGR, HERC | 702        | 20       | 20594     | 4.400427    | 1          |

| Count | %        | PValue   | Genes      | List Total | Pop Hits | Pop Total | Fold Enrich | Bonferroni |
|-------|----------|----------|------------|------------|----------|-----------|-------------|------------|
| 14    | 1.871658 | 0.066455 | NDUFAF6, I | 728        | 254      | 22680     | 1.717141    | 1          |

|    |          |          |           |     |     |       |          |   |
|----|----------|----------|-----------|-----|-----|-------|----------|---|
| 5  | 0.668449 | 0.083825 | SLC25A33, | 638 | 47  | 18012 | 3.003402 | 1 |
| 5  | 0.668449 | 0.100302 | SLC25A33, | 702 | 52  | 20594 | 2.820787 | 1 |
| 5  | 0.668449 | 0.100302 | SLC25A33, | 702 | 52  | 20594 | 2.820787 | 1 |
| 5  | 0.668449 | 0.105503 | SLC25A33, | 638 | 51  | 18012 | 2.767841 | 1 |
| 5  | 0.668449 | 0.105503 | SLC25A33, | 638 | 51  | 18012 | 2.767841 | 1 |
| 11 | 1.470588 | 0.493793 | MRPL24, R | 642 | 264 | 17446 | 1.132269 | 1 |

| Count | %        | PValue   | Genes       | List Total | Pop Hits | Pop Total | Fold Enrich | Bonferroni |
|-------|----------|----------|-------------|------------|----------|-----------|-------------|------------|
| 9     | 1.203209 | 0.029034 | STYK1, FLT: | 728        | 113      | 22680     | 2.48128     | 0.999953   |
| 8     | 1.069519 | 0.05211  | STYK1, FLT: | 702        | 99       | 20594     | 2.370601    | 1          |
| 5     | 0.668449 | 0.066073 | LAMA3, EP   | 661        | 42       | 18082     | 3.25661     | 1          |
| 9     | 1.203209 | 0.07766  | STYK1, FLT: | 642        | 121      | 17446     | 2.02124     | 1          |
| 5     | 0.668449 | 0.082419 | STYK1, RIPP | 642        | 45       | 17446     | 3.019384    | 1          |
| 9     | 1.203209 | 0.102485 | STYK1, FLT: | 702        | 139      | 20594     | 1.899465    | 1          |
| 5     | 0.668449 | 0.136265 | FLT1, EPHA  | 642        | 54       | 17446     | 2.516153    | 1          |
| 6     | 0.802139 | 0.142002 | FLT1, EPHA  | 702        | 81       | 20594     | 2.173051    | 1          |
| 6     | 0.802139 | 0.146586 | FLT1, EPHA  | 360        | 81       | 10425     | 2.145062    | 1          |
| 7     | 0.935829 | 0.158732 | STYK1, FLT: | 661        | 100      | 18082     | 1.914887    | 1          |
| 5     | 0.668449 | 0.212831 | FLT1, DYRK  | 661        | 65       | 18082     | 2.104271    | 1          |
| 4     | 0.534759 | 0.432372 | S100A6, ST  | 695        | 68       | 19662     | 1.664156    | 1          |
| 3     | 0.40107  | 0.444275 | STYK1, FES, | 661        | 41       | 18082     | 2.001624    | 1          |

| Count | %        | PValue   | Genes      | List Total | Pop Hits | Pop Total | Fold Enrich | Bonferroni |
|-------|----------|----------|------------|------------|----------|-----------|-------------|------------|
| 9     | 1.203209 | 0.038104 | POLR3H, PC | 289        | 103      | 7720      | 2.334128    | 0.999937   |
| 4     | 0.534759 | 0.094404 | POLR3H, PC | 728        | 34       | 22680     | 3.665158    | 1          |
| 4     | 0.534759 | 0.099625 | POLR3H, PC | 289        | 30       | 7720      | 3.561707    | 1          |
| 4     | 0.534759 | 0.136377 | POLR3H, PC | 642        | 35       | 17446     | 3.105652    | 1          |
| 3     | 0.40107  | 0.140178 | POLR3H, PC | 642        | 18       | 17446     | 4.529076    | 1          |
| 3     | 0.40107  | 0.1435   | POLR3H, PC | 695        | 19       | 19662     | 4.466944    | 1          |
| 3     | 0.40107  | 0.151436 | POLR3H, PC | 661        | 19       | 18082     | 4.319293    | 1          |
| 9     | 1.203209 | 0.351808 | XDH, ADSS, | 289        | 179      | 7720      | 1.343102    | 1          |

| Count | %        | PValue   | Genes      | List Total | Pop Hits | Pop Total | Fold Enrich | Bonferroni |
|-------|----------|----------|------------|------------|----------|-----------|-------------|------------|
| 7     | 0.935829 | 0.072907 | NRP2, EPH, | 702        | 86       | 20594     | 2.387829    | 1          |
| 3     | 0.40107  | 0.149826 | NRP2, CNTI | 360        | 20       | 10425     | 4.34375     | 1          |
| 3     | 0.40107  | 0.171298 | NRP2, CNTI | 702        | 22       | 20594     | 4.000389    | 1          |

| Count | %        | PValue   | Genes      | List Total | Pop Hits | Pop Total | Fold Enrich | Bonferroni |
|-------|----------|----------|------------|------------|----------|-----------|-------------|------------|
| 4     | 0.534759 | 0.081559 | SAV1, ARH, | 638        | 29       | 18012     | 3.894066    | 1          |
| 4     | 0.534759 | 0.081559 | SAV1, ARH, | 638        | 29       | 18012     | 3.894066    | 1          |
| 4     | 0.534759 | 0.219406 | SAV1, ARH, | 360        | 47       | 10425     | 2.464539    | 1          |
| 4     | 0.534759 | 0.250951 | SAV1, ARH, | 702        | 51       | 20594     | 2.300877    | 1          |

| Count | %        | PValue   | Genes      | List Total | Pop Hits | Pop Total | Fold Enrich | Bonferroni |
|-------|----------|----------|------------|------------|----------|-----------|-------------|------------|
| 17    | 2.272727 | 0.041623 | TRP53, CEB | 642        | 270      | 17446     | 1.710984    | 1          |

|    |          |          |            |     |     |       |          |   |
|----|----------|----------|------------|-----|-----|-------|----------|---|
| 26 | 3.475936 | 0.150326 | AKNA, TRP! | 728 | 624 | 22680 | 1.298077 | 1 |
| 15 | 2.005348 | 0.443404 | CEBPA, AKI | 642 | 359 | 17446 | 1.135423 | 1 |

| Count | %        | PValue   | Genes      | List Total | Pop Hits | Pop Total | Fold Enrich | Bonferroni |
|-------|----------|----------|------------|------------|----------|-----------|-------------|------------|
| 7     | 0.935829 | 0.054393 | ARHGEF3, S | 642        | 74       | 17446     | 2.570557    | 1          |
| 21    | 2.807487 | 0.067744 | ARHGEF3, I | 702        | 409      | 20594     | 1.506259    | 1          |
| 12    | 1.604278 | 0.261381 | ARHGEF3, I | 360        | 253      | 10425     | 1.373518    | 1          |
| 12    | 1.604278 | 0.282081 | ARHGEF3, I | 702        | 262      | 20594     | 1.343642    | 1          |
| 10    | 1.336898 | 0.316208 | ARHGEF3, I | 638        | 208      | 18012     | 1.357306    | 1          |

| Count | %        | PValue   | Genes       | List Total | Pop Hits | Pop Total | Fold Enrich | Bonferroni |
|-------|----------|----------|-------------|------------|----------|-----------|-------------|------------|
| 4     | 0.534759 | 0.046095 | XDH, DLD, I | 638        | 23       | 18012     | 4.909909    | 1          |
| 9     | 1.203209 | 0.058087 | XDH, CYB5I  | 728        | 130      | 22680     | 2.156805    | 1          |
| 8     | 1.069519 | 0.085369 | XDH, CYB5I  | 728        | 118      | 22680     | 2.112125    | 1          |
| 5     | 0.668449 | 0.272237 | XDH, DLD, I | 642        | 72       | 17446     | 1.887115    | 1          |
| 4     | 0.534759 | 0.347156 | XDH, CYB5I  | 638        | 59       | 18012     | 1.914032    | 1          |
| 3     | 0.40107  | 0.637095 | L2HGDH, D   | 702        | 63       | 20594     | 1.396961    | 1          |

| Count | %        | PValue   | Genes       | List Total | Pop Hits | Pop Total | Fold Enrich | Bonferroni |
|-------|----------|----------|-------------|------------|----------|-----------|-------------|------------|
| 3     | 0.40107  | 0.085833 | IGFBP6, NII | 638        | 14       | 18012     | 6.049709    | 1          |
| 3     | 0.40107  | 0.112423 | IGFBP6, NII | 702        | 17       | 20594     | 5.176973    | 1          |
| 3     | 0.40107  | 0.114559 | IGFBP6, NII | 360        | 17       | 10425     | 5.110294    | 1          |
| 5     | 0.668449 | 0.64995  | HTRA1, IGF  | 702        | 130      | 20594     | 1.128315    | 1          |

| Count | %       | PValue | Genes      | List Total | Pop Hits | Pop Total | Fold Enrich | Bonferroni |
|-------|---------|--------|------------|------------|----------|-----------|-------------|------------|
| 3     | 0.40107 | 0.169  | ITGB7, CAC | 638        | 21       | 18012     | 4.033139    | 1          |
| 3     | 0.40107 | 0.169  | ITGB7, CAC | 638        | 21       | 18012     | 4.033139    | 1          |
| 3     | 0.40107 | 0.169  | ITGB7, CAC | 638        | 21       | 18012     | 4.033139    | 1          |
| 3     | 0.40107 | 0.169  | ITGB7, CAC | 638        | 21       | 18012     | 4.033139    | 1          |

| Count | %        | PValue   | Genes      | List Total | Pop Hits | Pop Total | Fold Enrich | Bonferroni |
|-------|----------|----------|------------|------------|----------|-----------|-------------|------------|
| 9     | 1.203209 | 0.09329  | WDFY1, SP  | 702        | 136      | 20594     | 1.941365    | 1          |
| 4     | 0.534759 | 0.122901 | WDFY1, ZF' | 702        | 36       | 20594     | 3.259576    | 1          |
| 3     | 0.40107  | 0.272125 | WDFY1, ZF' | 702        | 30       | 20594     | 2.933618    | 1          |
| 3     | 0.40107  | 0.276591 | WDFY1, ZF' | 360        | 30       | 10425     | 2.895833    | 1          |

| Count | %        | PValue   | Genes      | List Total | Pop Hits | Pop Total | Fold Enrich | Bonferroni |
|-------|----------|----------|------------|------------|----------|-----------|-------------|------------|
| 6     | 0.802139 | 0.01573  | TRIM65, TF | 638        | 42       | 18012     | 4.033139    | 1          |
| 12    | 1.604278 | 0.023917 | TRIM65, TF | 702        | 163      | 20594     | 2.159719    | 1          |
| 5     | 0.668449 | 0.036166 | TRIM30A, T | 702        | 37       | 20594     | 3.964349    | 1          |
| 11    | 1.470588 | 0.183651 | NRP2, TRIM | 702        | 211      | 20594     | 1.529374    | 1          |
| 4     | 0.534759 | 0.306803 | TRIM65, TF | 702        | 57       | 20594     | 2.058679    | 1          |
| 4     | 0.534759 | 0.347156 | TRIM65, TF | 638        | 59       | 18012     | 1.914032    | 1          |
| 4     | 0.534759 | 0.351044 | TRIM30A, T | 360        | 61       | 10425     | 1.898907    | 1          |



|   |          |          |            |     |    |       |          |   |
|---|----------|----------|------------|-----|----|-------|----------|---|
| 4 | 0.534759 | 0.436715 | TRIM30A, T | 702 | 71 | 20594 | 1.652743 | 1 |
| 4 | 0.534759 | 0.480307 | TRIM65, TF | 360 | 75 | 10425 | 1.544444 | 1 |
| 4 | 0.534759 | 0.489796 | TRIM65, TF | 702 | 77 | 20594 | 1.523958 | 1 |
| 4 | 0.534759 | 0.540311 | TRIM65, TF | 702 | 83 | 20594 | 1.413792 | 1 |

| Count | %        | PValue   | Genes      | List Total | Pop Hits | Pop Total | Fold Enrich | Bonferroni |
|-------|----------|----------|------------|------------|----------|-----------|-------------|------------|
| 3     | 0.40107  | 0.119786 | ZC3H3, ZC3 | 638        | 17       | 18012     | 4.982113    | 1          |
| 5     | 0.668449 | 0.140954 | ZC3H3, ZC3 | 702        | 59       | 20594     | 2.486117    | 1          |
| 3     | 0.40107  | 0.300249 | ZC3H3, ZC3 | 638        | 31       | 18012     | 2.732127    | 1          |
| 3     | 0.40107  | 0.300249 | ZC3H3, ZC3 | 638        | 31       | 18012     | 2.732127    | 1          |

| Count | %        | PValue   | Genes      | List Total | Pop Hits | Pop Total | Fold Enrich | Bonferroni |
|-------|----------|----------|------------|------------|----------|-----------|-------------|------------|
| 4     | 0.534759 | 0.142937 | RNF165, G  | 661        | 36       | 18082     | 3.039502    | 1          |
| 3     | 0.40107  | 0.204286 | GATA4, TGI | 661        | 23       | 18082     | 3.568112    | 1          |
| 4     | 0.534759 | 0.315274 | SEC24B, G  | 661        | 54       | 18082     | 2.026335    | 1          |

| Count | %        | PValue   | Genes       | List Total | Pop Hits | Pop Total | Fold Enrich | Bonferroni |
|-------|----------|----------|-------------|------------|----------|-----------|-------------|------------|
| 7     | 0.935829 | 0.012321 | TRP53, CCM  | 289        | 52       | 7720      | 3.595954    | 0.954356   |
| 9     | 1.203209 | 0.012736 | TRAF1, TRP  | 289        | 84       | 7720      | 2.862086    | 0.958899   |
| 11    | 1.470588 | 0.015515 | TRP53, IRA  | 289        | 122      | 7720      | 2.408531    | 0.979629   |
| 7     | 0.935829 | 0.017371 | CEBPA, CCM  | 289        | 56       | 7720      | 3.3391      | 0.987266   |
| 8     | 1.069519 | 0.018619 | CCND1, SO   | 289        | 73       | 7720      | 2.92743     | 0.990719   |
| 7     | 0.935829 | 0.031392 | TRP53, SLC  | 289        | 64       | 7720      | 2.921713    | 0.999644   |
| 8     | 1.069519 | 0.043201 | EREG, PAK3  | 289        | 87       | 7720      | 2.45635     | 0.999983   |
| 11    | 1.470588 | 0.044293 | IRF9, CCND  | 289        | 145      | 7720      | 2.026488    | 0.999987   |
| 6     | 0.802139 | 0.056802 | TRP53, CCM  | 289        | 56       | 7720      | 2.862086    | 1          |
| 9     | 1.203209 | 0.059958 | TRP53, CCM  | 289        | 113      | 7720      | 2.127568    | 1          |
| 13    | 1.737968 | 0.076238 | TRP53, CTS  | 289        | 203      | 7720      | 1.710672    | 1          |
| 4     | 0.534759 | 0.092084 | TRP53, CCM  | 289        | 29       | 7720      | 3.684525    | 1          |
| 10    | 1.336898 | 0.095115 | DDX58, TRI  | 289        | 146      | 7720      | 1.829644    | 1          |
| 6     | 0.802139 | 0.119475 | NFKBIB, SO  | 289        | 70       | 7720      | 2.289669    | 1          |
| 9     | 1.203209 | 0.127402 | TNFSF10, C  | 289        | 134      | 7720      | 1.794143    | 1          |
| 6     | 0.802139 | 0.130345 | TRP53, CCM  | 289        | 72       | 7720      | 2.226067    | 1          |
| 5     | 0.668449 | 0.184669 | TRP53, TNF  | 289        | 60       | 7720      | 2.226067    | 1          |
| 8     | 1.069519 | 0.195725 | CPT1C, CCM  | 289        | 127      | 7720      | 1.682696    | 1          |
| 4     | 0.534759 | 0.195928 | TRP53, CCM  | 289        | 41       | 7720      | 2.606127    | 1          |
| 5     | 0.668449 | 0.215631 | TRP53, CCM  | 289        | 64       | 7720      | 2.086938    | 1          |
| 5     | 0.668449 | 0.223587 | TRP53, CCM  | 289        | 65       | 7720      | 2.054831    | 1          |
| 5     | 0.668449 | 0.223587 | TRP53, CCM  | 289        | 65       | 7720      | 2.054831    | 1          |
| 17    | 2.272727 | 0.235891 | TRP53, FLT  | 289        | 351      | 7720      | 1.293782    | 1          |
| 5     | 0.668449 | 0.239719 | PAK3, SOS2  | 289        | 67       | 7720      | 1.993493    | 1          |
| 4     | 0.534759 | 0.286031 | PIK3CD, PIK | 289        | 50       | 7720      | 2.137024    | 1          |
| 18    | 2.406417 | 0.316373 | TRP53, TRA  | 289        | 397      | 7720      | 1.21116     | 1          |
| 6     | 0.802139 | 0.324675 | PLA2G4A, I  | 289        | 101      | 7720      | 1.586899    | 1          |
| 6     | 0.802139 | 0.347003 | PAK3, NFKE  | 289        | 104      | 7720      | 1.541123    | 1          |
| 8     | 1.069519 | 0.376131 | PLA2G4A, C  | 289        | 158      | 7720      | 1.352547    | 1          |
| 4     | 0.534759 | 0.388954 | PLA2G4A, F  | 289        | 60       | 7720      | 1.780854    | 1          |

|    |          |          |             |     |     |       |          |   |
|----|----------|----------|-------------|-----|-----|-------|----------|---|
| 6  | 0.802139 | 0.391856 | SLC27A1, P  | 289 | 110 | 7720  | 1.457062 | 1 |
| 5  | 0.668449 | 0.417375 | TRP53, CCM  | 289 | 88  | 7720  | 1.517773 | 1 |
| 12 | 1.604278 | 0.458844 | TRP53, CCM  | 289 | 278 | 7720  | 1.153071 | 1 |
| 3  | 0.40107  | 0.468295 | PIK3CD, PIK | 289 | 42  | 7720  | 1.908057 | 1 |
| 4  | 0.534759 | 0.468756 | PLA2G4A, S  | 289 | 68  | 7720  | 1.571341 | 1 |
| 4  | 0.534759 | 0.497503 | TRP53, CCM  | 289 | 71  | 7720  | 1.504947 | 1 |
| 5  | 0.668449 | 0.500089 | SOS2, PIK3C | 289 | 98  | 7720  | 1.362898 | 1 |
| 5  | 0.668449 | 0.554873 | TNFSF10, S  | 289 | 105 | 7720  | 1.272038 | 1 |
| 4  | 0.534759 | 0.612003 | PIK3CD, AR  | 289 | 84  | 7720  | 1.272038 | 1 |
| 5  | 0.668449 | 0.622557 | TRP53, CCM  | 661 | 117 | 18082 | 1.169039 | 1 |
| 3  | 0.40107  | 0.652346 | PIK3CD, PIK | 289 | 59  | 7720  | 1.358278 | 1 |
| 8  | 1.069519 | 0.692635 | EZR, PAK3,  | 289 | 214 | 7720  | 0.998609 | 1 |
| 6  | 0.802139 | 0.702957 | CEBPA, PIK  | 289 | 157 | 7720  | 1.020871 | 1 |
| 5  | 0.668449 | 0.772844 | SOS2, PIK3C | 289 | 140 | 7720  | 0.954029 | 1 |
| 4  | 0.534759 | 0.799426 | KCNQ5, PIK  | 289 | 113 | 7720  | 0.945586 | 1 |
| 4  | 0.534759 | 0.84748  | TRP53, CCM  | 289 | 124 | 7720  | 0.861703 | 1 |
| 4  | 0.534759 | 0.855058 | PLA2G4A, F  | 289 | 126 | 7720  | 0.848025 | 1 |
| 5  | 0.668449 | 0.886952 | GATA4, PIK  | 289 | 171 | 7720  | 0.781076 | 1 |
| 8  | 1.069519 | 0.896241 | TRP53, CCM  | 289 | 276 | 7720  | 0.774284 | 1 |
| 4  | 0.534759 | 0.923272 | CACNG8, P   | 289 | 150 | 7720  | 0.712341 | 1 |
| 3  | 0.40107  | 0.949234 | TRP53, PIK  | 289 | 124 | 7720  | 0.646277 | 1 |
| 3  | 0.40107  | 0.959425 | PLA2G4A, F  | 289 | 131 | 7720  | 0.611744 | 1 |
| 4  | 0.534759 | 0.980097 | PTGER3, PI  | 289 | 197 | 7720  | 0.542392 | 1 |

| Count | %        | PValue   | Genes       | List Total | Pop Hits | Pop Total | Fold Enrich | Bonferroni |
|-------|----------|----------|-------------|------------|----------|-----------|-------------|------------|
| 13    | 1.737968 | 0.043339 | ZFP710, ZFI | 638        | 194      | 18012     | 1.891833    | 1          |
| 13    | 1.737968 | 0.080804 | ZFP710, ZFI | 638        | 215      | 18012     | 1.70705     | 1          |
| 8     | 1.069519 | 0.172872 | ZFP710, ZFI | 638        | 129      | 18012     | 1.75082     | 1          |
| 4     | 0.534759 | 0.250054 | ZFP13, ZFP  | 638        | 49       | 18012     | 2.304651    | 1          |
| 5     | 0.668449 | 0.273853 | ZFP710, ZFI | 638        | 75       | 18012     | 1.882132    | 1          |
| 8     | 1.069519 | 0.292308 | ZFP710, ZFI | 638        | 152      | 18012     | 1.485893    | 1          |
| 5     | 0.668449 | 0.394468 | ZFP710, ZFI | 638        | 90       | 18012     | 1.568443    | 1          |
| 6     | 0.802139 | 0.412649 | ZFP710, ZFI | 638        | 119      | 18012     | 1.423461    | 1          |
| 4     | 0.534759 | 0.433636 | ZFP93, PRD  | 638        | 68       | 18012     | 1.660704    | 1          |
| 5     | 0.668449 | 0.481322 | ZFP710, ZFI | 638        | 101      | 18012     | 1.397623    | 1          |

| Count | %        | PValue   | Genes       | List Total | Pop Hits | Pop Total | Fold Enrich | Bonferroni |
|-------|----------|----------|-------------|------------|----------|-----------|-------------|------------|
| 3     | 0.40107  | 0.177551 | LCMT2, TRI  | 661        | 21       | 18082     | 3.907932    | 1          |
| 9     | 1.203209 | 0.204762 | METTTL13, T | 728        | 176      | 22680     | 1.593094    | 1          |
| 8     | 1.069519 | 0.244533 | TRMT1L, LC  | 728        | 158      | 22680     | 1.57741     | 1          |
| 9     | 1.203209 | 0.276729 | METTTL13, T | 661        | 169      | 18082     | 1.456803    | 1          |
| 9     | 1.203209 | 0.277284 | METTTL13, T | 642        | 168      | 17446     | 1.455774    | 1          |

| Count | %       | PValue   | Genes       | List Total | Pop Hits | Pop Total | Fold Enrich | Bonferroni |
|-------|---------|----------|-------------|------------|----------|-----------|-------------|------------|
| 3     | 0.40107 | 0.23391  | ELF1, ETS1, | 702        | 27       | 20594     | 3.259576    | 1          |
| 3     | 0.40107 | 0.234049 | ELF1, ETS1, | 638        | 26       | 18012     | 3.257536    | 1          |
| 3     | 0.40107 | 0.237885 | ELF1, ETS1, | 360        | 27       | 10425     | 3.217593    | 1          |

| Count | %        | PValue   | Genes      | List Total | Pop Hits | Pop Total | Fold Enrich | Bonferroni |
|-------|----------|----------|------------|------------|----------|-----------|-------------|------------|
| 8     | 1.069519 | 0.139713 | CTSL, USP1 | 728        | 134      | 22680     | 1.859931    | 1          |
| 9     | 1.203209 | 0.148221 | CTSL, USP1 | 642        | 141      | 17446     | 1.73454     | 1          |
| 21    | 2.807487 | 0.288312 | AMZ1, ERN  | 728        | 542      | 22680     | 1.207068    | 1          |
| 22    | 2.941176 | 0.346263 | AMZ1, ERN  | 642        | 516      | 17446     | 1.158601    | 1          |
| 24    | 3.208556 | 0.369958 | AMZ1, ERN  | 661        | 582      | 18082     | 1.128063    | 1          |

| Count | %        | PValue   | Genes        | List Total | Pop Hits | Pop Total | Fold Enrich | Bonferroni |
|-------|----------|----------|--------------|------------|----------|-----------|-------------|------------|
| 9     | 1.203209 | 0.058087 | PTPRE, DUSP  | 728        | 130      | 22680     | 2.156805    | 1          |
| 10    | 1.336898 | 0.066124 | PTPRE, DUSP  | 661        | 138      | 18082     | 1.982284    | 1          |
| 10    | 1.336898 | 0.070759 | PTPRE, DUSP  | 642        | 139      | 17446     | 1.954997    | 1          |
| 7     | 0.935829 | 0.208025 | PTPRE, DUSP  | 661        | 109      | 18082     | 1.756777    | 1          |
| 7     | 0.935829 | 0.266739 | PTPRE, DUSP  | 642        | 118      | 17446     | 1.612044    | 1          |
| 6     | 0.802139 | 0.284837 | PTPRE, DUSP  | 642        | 97       | 17446     | 1.680894    | 1          |
| 5     | 0.668449 | 0.305161 | PTPRE, DUSP  | 702        | 82       | 20594     | 1.788792    | 1          |
| 5     | 0.668449 | 0.346022 | PTPRE, DUSP  | 638        | 84       | 18012     | 1.680475    | 1          |
| 4     | 0.534759 | 0.36306  | PTPRE, DUSP  | 702        | 63       | 20594     | 1.862615    | 1          |
| 4     | 0.534759 | 0.369987 | PTPRE, DUSP  | 360        | 63       | 10425     | 1.838624    | 1          |
| 4     | 0.534759 | 0.376301 | DUSP2, PTPRE | 638        | 62       | 18012     | 1.821418    | 1          |
| 3     | 0.40107  | 0.378295 | PTPRE, PTPRE | 360        | 38       | 10425     | 2.286184    | 1          |
| 3     | 0.40107  | 0.397113 | PTPRE, PTPRE | 702        | 40       | 20594     | 2.200214    | 1          |
| 3     | 0.40107  | 0.715431 | PTPRE, DUSP  | 702        | 73       | 20594     | 1.205597    | 1          |

| Count | %        | PValue   | Genes          | List Total | Pop Hits | Pop Total | Fold Enrich | Bonferroni |
|-------|----------|----------|----------------|------------|----------|-----------|-------------|------------|
| 9     | 1.203209 | 0.092668 | ANKRD27, IRGM1 | 695        | 131      | 19662     | 1.943632    | 1          |
| 14    | 1.871658 | 0.386352 | IRGM1, ZC3H7   | 695        | 331      | 19662     | 1.196583    | 1          |
| 10    | 1.336898 | 0.400532 | ANKRD27, IRGM1 | 728        | 249      | 22680     | 1.251158    | 1          |

| Count | %        | PValue   | Genes        | List Total | Pop Hits | Pop Total | Fold Enrich | Bonferroni |
|-------|----------|----------|--------------|------------|----------|-----------|-------------|------------|
| 8     | 1.069519 | 0.139713 | CTSL, USP1   | 728        | 134      | 22680     | 1.859931    | 1          |
| 9     | 1.203209 | 0.148221 | CTSL, USP1   | 642        | 141      | 17446     | 1.73454     | 1          |
| 6     | 0.802139 | 0.152964 | USP18, ATXN3 | 642        | 77       | 17446     | 2.11749     | 1          |
| 3     | 0.40107  | 0.217815 | ATXN3, FAH   | 661        | 24       | 18082     | 3.41944     | 1          |
| 5     | 0.668449 | 0.317781 | USP18, ATXN3 | 661        | 78       | 18082     | 1.753559    | 1          |
| 5     | 0.668449 | 0.347253 | ATXN3, COG1  | 642        | 81       | 17446     | 1.677435    | 1          |
| 6     | 0.802139 | 0.666613 | USP18, ATXN3 | 661        | 154      | 18082     | 1.0658      | 1          |

| Count | %        | PValue   | Genes      | List Total | Pop Hits | Pop Total | Fold Enrich | Bonferroni |
|-------|----------|----------|------------|------------|----------|-----------|-------------|------------|
| 3     | 0.40107  | 0.13071  | GLUL, CAR1 | 289        | 17       | 7720      | 4.714024    | 1          |
| 7     | 0.935829 | 0.326954 | ODC1, CTH  | 728        | 146      | 22680     | 1.493678    | 1          |
| 7     | 0.935829 | 0.403214 | ODC1, CTH  | 642        | 139      | 17446     | 1.368498    | 1          |

| Count | % | PValue | Genes | List Total | Pop Hits | Pop Total | Fold Enrich | Bonferroni |
|-------|---|--------|-------|------------|----------|-----------|-------------|------------|
|-------|---|--------|-------|------------|----------|-----------|-------------|------------|

|   |          |          |            |     |     |       |          |   |
|---|----------|----------|------------|-----|-----|-------|----------|---|
| 7 | 0.935829 | 0.084695 | RAD1, ELAC | 642 | 83  | 17446 | 2.291821 | 1 |
| 3 | 0.40107  | 0.159123 | ELAC1, CPS | 702 | 21  | 20594 | 4.190883 | 1 |
| 5 | 0.668449 | 0.254518 | RAD1, ELAC | 728 | 80  | 22680 | 1.947115 | 1 |
| 5 | 0.668449 | 0.571601 | RAD1, ELAC | 728 | 125 | 22680 | 1.246154 | 1 |
| 5 | 0.668449 | 0.614226 | RAD1, ELAC | 642 | 115 | 17446 | 1.181498 | 1 |

| Count | %        | PValue   | Genes      | List Total | Pop Hits | Pop Total | Fold Enrich | Bonferroni |
|-------|----------|----------|------------|------------|----------|-----------|-------------|------------|
| 9     | 1.203209 | 0.12582  | SLC16A1, S | 702        | 146      | 20594     | 1.808395    | 1          |
| 5     | 0.668449 | 0.19391  | SLC16A1, S | 702        | 67       | 20594     | 2.189267    | 1          |
| 11    | 1.470588 | 0.859647 | KCNQ5, SLC | 661        | 364      | 18082     | 0.826678    | 1          |

| Count | %        | PValue   | Genes        | List Total | Pop Hits | Pop Total | Fold Enrich | Bonferroni |
|-------|----------|----------|--------------|------------|----------|-----------|-------------|------------|
| 5     | 0.668449 | 0.082419 | FLT3, F3, IL | 642        | 45       | 17446     | 3.019384    | 1          |
| 3     | 0.40107  | 0.339601 | IL11RA1, IL  | 638        | 34       | 18012     | 2.491057    | 1          |
| 5     | 0.668449 | 0.931585 | EPHA8, F3,   | 702        | 211      | 20594     | 0.69517     | 1          |

| Count | %        | PValue   | Genes      | List Total | Pop Hits | Pop Total | Fold Enrich | Bonferroni |
|-------|----------|----------|------------|------------|----------|-----------|-------------|------------|
| 9     | 1.203209 | 0.13265  | RAP2B, RAI | 728        | 157      | 22680     | 1.785889    | 1          |
| 7     | 0.935829 | 0.194338 | RAP2B, RAI | 638        | 110      | 18012     | 1.79658     | 1          |
| 8     | 1.069519 | 0.330997 | RAP2B, DN. | 702        | 165      | 20594     | 1.42236     | 1          |
| 11    | 1.470588 | 0.33246  | RAP2B, RAI | 638        | 238      | 18012     | 1.304839    | 1          |
| 11    | 1.470588 | 0.36005  | RAP2B, DN. | 661        | 236      | 18082     | 1.275046    | 1          |
| 5     | 0.668449 | 0.473604 | RAP2B, RAI | 638        | 100      | 18012     | 1.411599    | 1          |
| 6     | 0.802139 | 0.481637 | RAP2B, DN. | 702        | 134      | 20594     | 1.31356     | 1          |

| Count | %        | PValue   | Genes       | List Total | Pop Hits | Pop Total | Fold Enrich | Bonferroni |
|-------|----------|----------|-------------|------------|----------|-----------|-------------|------------|
| 31    | 4.144385 | 0.058659 | ZFP358, ZFP | 702        | 652      | 20594     | 1.394818    | 1          |
| 4     | 0.534759 | 0.250054 | ZFP13, ZFP  | 638        | 49       | 18012     | 2.304651    | 1          |
| 11    | 1.470588 | 0.818374 | ZFP13, ZFP  | 360        | 367      | 10425     | 0.867961    | 1          |
| 11    | 1.470588 | 0.820241 | ZFP13, ZFP  | 702        | 373      | 20594     | 0.865142    | 1          |

| Count | %        | PValue   | Genes      | List Total | Pop Hits | Pop Total | Fold Enrich | Bonferroni |
|-------|----------|----------|------------|------------|----------|-----------|-------------|------------|
| 25    | 3.342246 | 0.235365 | XDH, CYB5I | 728        | 639      | 22680     | 1.218852    | 1          |
| 26    | 3.475936 | 0.292033 | XDH, CYB5I | 642        | 604      | 17446     | 1.169761    | 1          |
| 26    | 3.475936 | 0.505826 | XDH, CYB5I | 661        | 676      | 18082     | 1.052135    | 1          |

| Count | %        | PValue   | Genes      | List Total | Pop Hits | Pop Total | Fold Enrich | Bonferroni |
|-------|----------|----------|------------|------------|----------|-----------|-------------|------------|
| 8     | 1.069519 | 0.094408 | SASH1, MA  | 702        | 114      | 20594     | 2.058679    | 1          |
| 5     | 0.668449 | 0.375004 | SASH1, EPF | 702        | 91       | 20594     | 1.611878    | 1          |
| 4     | 0.534759 | 0.548622 | SASH1, EPF | 360        | 83       | 10425     | 1.395582    | 1          |
| 3     | 0.40107  | 0.713762 | EPHA8, BIC | 638        | 70       | 18012     | 1.209942    | 1          |

| Count | % | PValue | Genes | List Total | Pop Hits | Pop Total | Fold Enrich | Bonferroni |
|-------|---|--------|-------|------------|----------|-----------|-------------|------------|
|-------|---|--------|-------|------------|----------|-----------|-------------|------------|

|   |          |          |            |     |     |       |          |   |
|---|----------|----------|------------|-----|-----|-------|----------|---|
| 3 | 0.40107  | 0.08045  | H2-Q4, H2- | 642 | 13  | 17446 | 6.271028 | 1 |
| 3 | 0.40107  | 0.107779 | H2-Q4, H2- | 695 | 16  | 19662 | 5.304496 | 1 |
| 4 | 0.534759 | 0.228644 | H2-Q4, TAF | 642 | 45  | 17446 | 2.415507 | 1 |
| 4 | 0.534759 | 0.316186 | H2-Q4, PRC | 702 | 58  | 20594 | 2.023185 | 1 |
| 3 | 0.40107  | 0.380281 | H2-Q4, H2- | 661 | 36  | 18082 | 2.279627 | 1 |
| 4 | 0.534759 | 0.418553 | H2-Q4, PRC | 702 | 69  | 20594 | 1.700648 | 1 |
| 3 | 0.40107  | 0.455976 | H2-Q4, H2- | 702 | 45  | 20594 | 1.955745 | 1 |
| 3 | 0.40107  | 0.790189 | H2-Q4, H2- | 702 | 85  | 20594 | 1.035395 | 1 |
| 3 | 0.40107  | 0.856308 | H2-Q4, H2- | 360 | 98  | 10425 | 0.88648  | 1 |
| 3 | 0.40107  | 0.862678 | H2-Q4, H2- | 702 | 101 | 20594 | 0.871372 | 1 |

| Count | %        | PValue   | Genes      | List Total | Pop Hits | Pop Total | Fold Enrich | Bonferroni |
|-------|----------|----------|------------|------------|----------|-----------|-------------|------------|
| 3     | 0.40107  | 0.143945 | TADA2A, TI | 638        | 19       | 18012     | 4.45768     | 1          |
| 3     | 0.40107  | 0.196064 | TADA2A, TI | 702        | 24       | 20594     | 3.667023    | 1          |
| 3     | 0.40107  | 0.444463 | TADA2A, TI | 702        | 44       | 20594     | 2.000194    | 1          |
| 3     | 0.40107  | 0.450598 | TADA2A, TI | 360        | 44       | 10425     | 1.974432    | 1          |
| 7     | 0.935829 | 0.978608 | HOXC8, TAI | 702        | 345      | 20594     | 0.595227    | 1          |

| Count | %        | PValue   | Genes      | List Total | Pop Hits | Pop Total | Fold Enrich | Bonferroni |
|-------|----------|----------|------------|------------|----------|-----------|-------------|------------|
| 3     | 0.40107  | 0.246631 | TSPAN11, T | 702        | 28       | 20594     | 3.143162    | 1          |
| 3     | 0.40107  | 0.272125 | TSPAN11, T | 702        | 30       | 20594     | 2.933618    | 1          |
| 3     | 0.40107  | 0.284867 | TSPAN11, T | 702        | 31       | 20594     | 2.838985    | 1          |
| 3     | 0.40107  | 0.365437 | TSPAN11, T | 86         | 27       | 1807      | 2.334625    | 1          |
| 7     | 0.935829 | 0.814927 | TSPAN11, T | 661        | 219      | 18082     | 0.874377    | 1          |

| Count | %        | PValue   | Genes      | List Total | Pop Hits | Pop Total | Fold Enrich | Bonferroni |
|-------|----------|----------|------------|------------|----------|-----------|-------------|------------|
| 3     | 0.40107  | 0.221229 | EZR, PTPN3 | 702        | 26       | 20594     | 3.384944    | 1          |
| 3     | 0.40107  | 0.225032 | EZR, PTPN3 | 360        | 26       | 10425     | 3.341346    | 1          |
| 3     | 0.40107  | 0.246631 | EZR, PTPN3 | 702        | 28       | 20594     | 3.143162    | 1          |
| 4     | 0.534759 | 0.260175 | EZR, PTPN3 | 702        | 52       | 20594     | 2.256629    | 1          |
| 3     | 0.40107  | 0.487538 | EZR, PTPN3 | 638        | 46       | 18012     | 1.841216    | 1          |
| 3     | 0.40107  | 0.500605 | EZR, PTPN3 | 702        | 49       | 20594     | 1.796093    | 1          |
| 3     | 0.40107  | 0.500605 | EZR, PTPN3 | 702        | 49       | 20594     | 1.796093    | 1          |
| 3     | 0.40107  | 0.500605 | EZR, PTPN3 | 702        | 49       | 20594     | 1.796093    | 1          |
| 3     | 0.40107  | 0.507077 | EZR, PTPN3 | 360        | 49       | 10425     | 1.772959    | 1          |

| Count | %        | PValue   | Genes      | List Total | Pop Hits | Pop Total | Fold Enrich | Bonferroni |
|-------|----------|----------|------------|------------|----------|-----------|-------------|------------|
| 4     | 0.534759 | 0.056604 | MTG1, MRI  | 695        | 25       | 19662     | 4.526504    | 1          |
| 14    | 1.871658 | 0.340473 | MPHOSPH1   | 695        | 320      | 19662     | 1.237716    | 1          |
| 12    | 1.604278 | 0.391644 | MRPL24, RI | 728        | 308      | 22680     | 1.213786    | 1          |
| 8     | 1.069519 | 0.476233 | MRPL24, RI | 728        | 203      | 22680     | 1.227738    | 1          |
| 11    | 1.470588 | 0.493793 | MRPL24, RI | 642        | 264      | 17446     | 1.132269    | 1          |
| 8     | 1.069519 | 0.496968 | MRPL24, RI | 695        | 188      | 19662     | 1.203857    | 1          |
| 4     | 0.534759 | 0.912097 | MRPL24, RI | 289        | 145      | 7720      | 0.736905    | 1          |

| Count | %        | PValue   | Genes      | List Total | Pop Hits | Pop Total | Fold Enrich | Bonferroni |
|-------|----------|----------|------------|------------|----------|-----------|-------------|------------|
| 8     | 1.069519 | 0.259185 | PDZD7, PTF | 360        | 150      | 10425     | 1.544444    | 1          |
| 8     | 1.069519 | 0.271496 | PDZD7, PTF | 702        | 154      | 20594     | 1.523958    | 1          |
| 4     | 0.534759 | 0.6981   | PTPN3, SHF | 638        | 101      | 18012     | 1.118098    | 1          |

| Count | %        | PValue   | Genes      | List Total | Pop Hits | Pop Total | Fold Enrich | Bonferroni |
|-------|----------|----------|------------|------------|----------|-----------|-------------|------------|
| 4     | 0.534759 | 0.310985 | XDH, NUBP  | 728        | 61       | 22680     | 2.042875    | 1          |
| 4     | 0.534759 | 0.419442 | XDH, NUBP  | 642        | 64       | 17446     | 1.698403    | 1          |
| 3     | 0.40107  | 0.435112 | NUBPL, RS/ | 642        | 40       | 17446     | 2.038084    | 1          |

| Count | %        | PValue   | Genes      | List Total | Pop Hits | Pop Total | Fold Enrich | Bonferroni |
|-------|----------|----------|------------|------------|----------|-----------|-------------|------------|
| 4     | 0.534759 | 0.228644 | H2-Q4, TAF | 642        | 45       | 17446     | 2.415507    | 1          |
| 4     | 0.534759 | 0.230205 | IRGM1, TAI | 695        | 47       | 19662     | 2.407715    | 1          |
| 4     | 0.534759 | 0.595559 | CTSL, TAP1 | 289        | 82       | 7720      | 1.303064    | 1          |
| 6     | 0.802139 | 0.783801 | CTSL, TAP1 | 289        | 174      | 7720      | 0.921131    | 1          |

| Count | %        | PValue   | Genes      | List Total | Pop Hits | Pop Total | Fold Enrich | Bonferroni |
|-------|----------|----------|------------|------------|----------|-----------|-------------|------------|
| 9     | 1.203209 | 0.09329  | WDFY1, SP  | 702        | 136      | 20594     | 1.941365    | 1          |
| 3     | 0.40107  | 0.820645 | PHF19, PHF | 702        | 91       | 20594     | 0.967127    | 1          |
| 3     | 0.40107  | 0.82628  | PHF19, PHF | 360        | 91       | 10425     | 0.95467     | 1          |

| Count | %        | PValue   | Genes      | List Total | Pop Hits | Pop Total | Fold Enrich | Bonferroni |
|-------|----------|----------|------------|------------|----------|-----------|-------------|------------|
| 3     | 0.40107  | 0.284867 | EPRS, GSTT | 702        | 31       | 20594     | 2.838985    | 1          |
| 3     | 0.40107  | 0.467351 | EPRS, GSTT | 702        | 46       | 20594     | 1.913229    | 1          |
| 6     | 0.802139 | 0.494662 | PRDX6, EPF | 702        | 136      | 20594     | 1.294243    | 1          |

| Count | %        | PValue   | Genes      | List Total | Pop Hits | Pop Total | Fold Enrich | Bonferroni |
|-------|----------|----------|------------|------------|----------|-----------|-------------|------------|
| 7     | 0.935829 | 0.22134  | TRAF1, CSF | 289        | 109      | 7720      | 1.715501    | 1          |
| 12    | 1.604278 | 0.303515 | TNFSF10, F | 289        | 245      | 7720      | 1.308382    | 1          |
| 7     | 0.935829 | 0.622216 | NAMPT, TN  | 728        | 200      | 22680     | 1.090385    | 1          |
| 8     | 1.069519 | 0.675437 | NAMPT, TN  | 642        | 214      | 17446     | 1.015867    | 1          |

| Count | %        | PValue   | Genes      | List Total | Pop Hits | Pop Total | Fold Enrich | Bonferroni |
|-------|----------|----------|------------|------------|----------|-----------|-------------|------------|
| 8     | 1.069519 | 0.195725 | CPT1C, CCN | 289        | 127      | 7720      | 1.682696    | 1          |
| 4     | 0.534759 | 0.506912 | CPT1C, NFK | 289        | 72       | 7720      | 1.484045    | 1          |
| 4     | 0.534759 | 0.727049 | CPT1C, PPF | 289        | 100      | 7720      | 1.068512    | 1          |

| Count | %        | PValue   | Genes     | List Total | Pop Hits | Pop Total | Fold Enrich | Bonferroni |
|-------|----------|----------|-----------|------------|----------|-----------|-------------|------------|
| 8     | 1.069519 | 0.163585 | MKS1, RPG | 728        | 140      | 22680     | 1.78022     | 1          |
| 9     | 1.203209 | 0.27046  | MKS1, SOR | 728        | 191      | 22680     | 1.467982    | 1          |
| 12    | 1.604278 | 0.298801 | PDZD7, MK | 695        | 257      | 19662     | 1.320964    | 1          |
| 3     | 0.40107  | 0.313384 | MKS1, FAM | 661        | 31       | 18082     | 2.647309    | 1          |
| 6     | 0.802139 | 0.340699 | MKS1, RPG | 695        | 109      | 19662     | 1.557283    | 1          |

|    |          |          |            |     |     |       |          |   |
|----|----------|----------|------------|-----|-----|-------|----------|---|
| 7  | 0.935829 | 0.475034 | MKS1, RPG  | 661 | 151 | 18082 | 1.268137 | 1 |
| 7  | 0.935829 | 0.591018 | MKS1, RPG  | 661 | 170 | 18082 | 1.126404 | 1 |
| 5  | 0.668449 | 0.697596 | MKS1, RPG  | 661 | 129 | 18082 | 1.060292 | 1 |
| 14 | 1.871658 | 0.768194 | RPGR, POLI | 695 | 435 | 19662 | 0.910504 | 1 |
| 3  | 0.40107  | 0.906878 | MKS1, IFT8 | 695 | 111 | 19662 | 0.764612 | 1 |

| Count | %       | PValue   | Genes       | List Total | Pop Hits | Pop Total | Fold Enrich | Bonferroni |
|-------|---------|----------|-------------|------------|----------|-----------|-------------|------------|
| 3     | 0.40107 | 0.300249 | EIF4G3, IPC | 638        | 31       | 18012     | 2.732127    | 1          |
| 3     | 0.40107 | 0.390917 | EIF4G3, IPC | 638        | 38       | 18012     | 2.22884     | 1          |
| 3     | 0.40107 | 0.440371 | EIF4G3, IPC | 638        | 42       | 18012     | 2.01657     | 1          |
| 3     | 0.40107 | 0.521242 | EIF4G3, IPC | 638        | 49       | 18012     | 1.728488    | 1          |
| 3     | 0.40107 | 0.521242 | EIF4G3, IPC | 638        | 49       | 18012     | 1.728488    | 1          |

| Count | %        | PValue   | Genes     | List Total | Pop Hits | Pop Total | Fold Enrich | Bonferroni |
|-------|----------|----------|-----------|------------|----------|-----------|-------------|------------|
| 5     | 0.668449 | 0.374807 | XDH, PEX1 | 289        | 83       | 7720      | 1.609205    | 1          |
| 5     | 0.668449 | 0.449885 | XDH, PEX1 | 728        | 107      | 22680     | 1.455787    | 1          |
| 6     | 0.802139 | 0.493699 | XDH, PEX1 | 695        | 131      | 19662     | 1.295755    | 1          |

| Count | %        | PValue   | Genes      | List Total | Pop Hits | Pop Total | Fold Enrich | Bonferroni |
|-------|----------|----------|------------|------------|----------|-----------|-------------|------------|
| 7     | 0.935829 | 0.207858 | ECI1, CPT1 | 728        | 124      | 22680     | 1.758685    | 1          |
| 7     | 0.935829 | 0.407034 | CEPT1, CYB | 728        | 160      | 22680     | 1.362981    | 1          |
| 7     | 0.935829 | 0.506673 | ECI1, CPT1 | 661        | 156      | 18082     | 1.227491    | 1          |
| 3     | 0.40107  | 0.520217 | PTGES, PRK | 728        | 54       | 22680     | 1.730769    | 1          |
| 3     | 0.40107  | 0.757863 | PTGES, PRK | 661        | 74       | 18082     | 1.109008    | 1          |

| Count | %        | PValue   | Genes     | List Total | Pop Hits | Pop Total | Fold Enrich | Bonferroni |
|-------|----------|----------|-----------|------------|----------|-----------|-------------|------------|
| 4     | 0.534759 | 0.316186 | LAMA3, CN | 702        | 58       | 20594     | 2.023185    | 1          |
| 3     | 0.40107  | 0.415003 | LAMA3, CN | 360        | 41       | 10425     | 2.118902    | 1          |
| 8     | 1.069519 | 0.700506 | LAMA3, ER | 702        | 237      | 20594     | 0.990251    | 1          |

| Count | %        | PValue   | Genes      | List Total | Pop Hits | Pop Total | Fold Enrich | Bonferroni |
|-------|----------|----------|------------|------------|----------|-----------|-------------|------------|
| 12    | 1.604278 | 0.200666 | WDR75, W   | 728        | 256      | 22680     | 1.460337    | 1          |
| 15    | 2.005348 | 0.263443 | WDFY1, RB  | 702        | 340      | 20594     | 1.294243    | 1          |
| 12    | 1.604278 | 0.283777 | WDR75, W   | 702        | 263      | 20594     | 1.338533    | 1          |
| 12    | 1.604278 | 0.299345 | WDR75, W   | 360        | 262      | 10425     | 1.326336    | 1          |
| 13    | 1.737968 | 0.35305  | WDR75, W   | 702        | 307      | 20594     | 1.242249    | 1          |
| 5     | 0.668449 | 0.375004 | WDFY1, WI  | 702        | 91       | 20594     | 1.611878    | 1          |
| 10    | 1.336898 | 0.486387 | RBBP5, WC  | 638        | 243      | 18012     | 1.16181     | 1          |
| 10    | 1.336898 | 0.514367 | RBBP5, WC  | 638        | 248      | 18012     | 1.138386    | 1          |
| 10    | 1.336898 | 0.514367 | RBBP5, WC  | 638        | 248      | 18012     | 1.138386    | 1          |
| 6     | 0.802139 | 0.644327 | WDFY1, WI  | 702        | 161      | 20594     | 1.093274    | 1          |
| 8     | 1.069519 | 0.70887  | RBBP5, WC  | 638        | 230      | 18012     | 0.981982    | 1          |
| 7     | 0.935829 | 0.760892 | RBBP5, WC  | 638        | 211      | 18012     | 0.936606    | 1          |
| 5     | 0.668449 | 0.846318 | RBBP5, NLE | 638        | 167      | 18012     | 0.845269    | 1          |
| 3     | 0.40107  | 0.942178 | NLE1, WDR  | 638        | 127      | 18012     | 0.666897    | 1          |

| Count | %        | PValue   | Genes      | List Total | Pop Hits | Pop Total | Fold Enrich | Bonferroni |
|-------|----------|----------|------------|------------|----------|-----------|-------------|------------|
| 4     | 0.534759 | 0.134455 | EZR, EPS8, | 661        | 35       | 18082     | 3.126345    | 1          |
| 7     | 0.935829 | 0.536544 | SH3GL3, SA | 638        | 166      | 18012     | 1.190505    | 1          |
| 7     | 0.935829 | 0.659679 | SH3GL3, SA | 728        | 208      | 22680     | 1.048447    | 1          |
| 7     | 0.935829 | 0.732021 | SH3GL3, SA | 702        | 212      | 20594     | 0.968648    | 1          |
| 6     | 0.802139 | 0.813854 | SH3GL3, SA | 360        | 197      | 10425     | 0.88198     | 1          |

| Count | %        | PValue   | Genes      | List Total | Pop Hits | Pop Total | Fold Enrich | Bonferroni |
|-------|----------|----------|------------|------------|----------|-----------|-------------|------------|
| 10    | 1.336898 | 0.363202 | CCND1, LAI | 289        | 207      | 7720      | 1.290474    | 1          |
| 6     | 0.802139 | 0.443864 | LAMA3, PIK | 289        | 117      | 7720      | 1.369887    | 1          |
| 4     | 0.534759 | 0.64353  | LAMA3, ITC | 289        | 88       | 7720      | 1.214218    | 1          |
| 4     | 0.534759 | 0.670373 | LAMA3, NII | 695        | 97       | 19662     | 1.166625    | 1          |

| Count | %        | PValue   | Genes      | List Total | Pop Hits | Pop Total | Fold Enrich | Bonferroni |
|-------|----------|----------|------------|------------|----------|-----------|-------------|------------|
| 3     | 0.40107  | 0.356814 | ARNTL2, M  | 642        | 34       | 17446     | 2.397746    | 1          |
| 7     | 0.935829 | 0.475945 | CEBPA, ARI | 638        | 156      | 18012     | 1.266819    | 1          |
| 5     | 0.668449 | 0.527729 | ARNTL2, M  | 360        | 110      | 10425     | 1.316288    | 1          |
| 5     | 0.668449 | 0.539396 | ARNTL2, M  | 702        | 113      | 20594     | 1.298061    | 1          |
| 5     | 0.668449 | 0.54854  | ARNTL2, M  | 638        | 110      | 18012     | 1.283272    | 1          |
| 7     | 0.935829 | 0.703006 | ANO1, ARN  | 642        | 190      | 17446     | 1.001164    | 1          |

| Count | %        | PValue   | Genes        | List Total | Pop Hits | Pop Total | Fold Enrich | Bonferroni |
|-------|----------|----------|--------------|------------|----------|-----------|-------------|------------|
| 5     | 0.668449 | 0.418511 | RIN1, STAT   | 638        | 93       | 18012     | 1.517848    | 1          |
| 5     | 0.668449 | 0.539396 | RIN1, STAT   | 702        | 113      | 20594     | 1.298061    | 1          |
| 4     | 0.534759 | 0.658571 | RIN1, STAT   | 728        | 105      | 22680     | 1.186813    | 1          |
| 4     | 0.534759 | 0.694039 | RIN1, FES, J | 360        | 103      | 10425     | 1.124595    | 1          |

| Count | %        | PValue   | Genes      | List Total | Pop Hits | Pop Total | Fold Enrich | Bonferroni |
|-------|----------|----------|------------|------------|----------|-----------|-------------|------------|
| 10    | 1.336898 | 0.31     | RNF165, HE | 642        | 199      | 17446     | 1.36555     | 1          |
| 20    | 2.673797 | 0.643067 | DTX4, USP4 | 728        | 631      | 22680     | 0.987444    | 1          |
| 13    | 1.737968 | 0.674345 | DTX4, NUB  | 661        | 362      | 18082     | 0.982381    | 1          |
| 9     | 1.203209 | 0.915598 | DTX3L, HEF | 642        | 326      | 17446     | 0.750215    | 1          |

| Count | %        | PValue   | Genes      | List Total | Pop Hits | Pop Total | Fold Enrich | Bonferroni |
|-------|----------|----------|------------|------------|----------|-----------|-------------|------------|
| 4     | 0.534759 | 0.481113 | C1QL1, COI | 702        | 76       | 20594     | 1.54401     | 1          |
| 4     | 0.534759 | 0.51559  | C1QL1, COI | 728        | 85       | 22680     | 1.466063    | 1          |
| 8     | 1.069519 | 0.630798 | LGALS3BP,  | 728        | 235      | 22680     | 1.060556    | 1          |
| 3     | 0.40107  | 0.796115 | C1QL1, COI | 695        | 83       | 19662     | 1.022554    | 1          |

| Count | %        | PValue   | Genes     | List Total | Pop Hits | Pop Total | Fold Enrich | Bonferroni |
|-------|----------|----------|-----------|------------|----------|-----------|-------------|------------|
| 12    | 1.604278 | 0.561857 | BZW2, KRT | 695        | 316      | 19662     | 1.074328    | 1          |
| 11    | 1.470588 | 0.577126 | BZW2, KRT | 642        | 279      | 17446     | 1.071394    | 1          |



|   |          |          |           |     |     |       |          |   |
|---|----------|----------|-----------|-----|-----|-------|----------|---|
| 7 | 0.935829 | 0.692098 | BZW2, ZC3 | 661 | 189 | 18082 | 1.013167 | 1 |
|---|----------|----------|-----------|-----|-----|-------|----------|---|

| Count | %        | PValue   | Genes      | List Total | Pop Hits | Pop Total | Fold Enrich | Bonferroni |
|-------|----------|----------|------------|------------|----------|-----------|-------------|------------|
| 4     | 0.534759 | 0.452332 | PLA2G4A, F | 638        | 70       | 18012     | 1.613256    | 1          |
| 6     | 0.802139 | 0.616663 | PLA2G4A, F | 702        | 156      | 20594     | 1.128315    | 1          |
| 4     | 0.534759 | 0.809964 | PLA2G4A, F | 360        | 125      | 10425     | 0.926667    | 1          |

| Count | %        | PValue   | Genes      | List Total | Pop Hits | Pop Total | Fold Enrich | Bonferroni |
|-------|----------|----------|------------|------------|----------|-----------|-------------|------------|
| 3     | 0.40107  | 0.489669 | ABCB1A, T/ | 702        | 48       | 20594     | 1.833511    | 1          |
| 3     | 0.40107  | 0.516566 | ABCB1A, T/ | 289        | 46       | 7720      | 1.742139    | 1          |
| 3     | 0.40107  | 0.542053 | ABCB1A, T/ | 642        | 49       | 17446     | 1.663742    | 1          |
| 3     | 0.40107  | 0.542809 | ABCB1A, T/ | 702        | 53       | 20594     | 1.660539    | 1          |
| 5     | 0.668449 | 0.72666  | NVL, ABCB: | 702        | 144      | 20594     | 1.018617    | 1          |
| 5     | 0.668449 | 0.735972 | NVL, ABCB: | 360        | 144      | 10425     | 1.005498    | 1          |
| 6     | 0.802139 | 0.862837 | TOR3A, AB  | 642        | 200      | 17446     | 0.815234    | 1          |

| Count | %        | PValue   | Genes     | List Total | Pop Hits | Pop Total | Fold Enrich | Bonferroni |
|-------|----------|----------|-----------|------------|----------|-----------|-------------|------------|
| 4     | 0.534759 | 0.587826 | HMHA1, Af | 702        | 89       | 20594     | 1.31848     | 1          |
| 3     | 0.40107  | 0.652404 | HMHA1, Af | 360        | 64       | 10425     | 1.357422    | 1          |
| 3     | 0.40107  | 0.658018 | HMHA1, Af | 638        | 63       | 18012     | 1.34438     | 1          |
| 3     | 0.40107  | 0.662233 | HMHA1, Af | 702        | 66       | 20594     | 1.333463    | 1          |

| Count | %        | PValue   | Genes        | List Total | Pop Hits | Pop Total | Fold Enrich | Bonferroni |
|-------|----------|----------|--------------|------------|----------|-----------|-------------|------------|
| 274   | 36.63102 | 0.020393 | S100A6, CN   | 695        | 6998     | 19662     | 1.107693    | 0.99994    |
| 132   | 17.64706 | 0.982442 | TSPAN5, CN   | 638        | 4312     | 18012     | 0.864244    | 1          |
| 251   | 33.55615 | 0.987727 | S100A6, CN   | 728        | 8683     | 22680     | 0.900566    | 1          |
| 57    | 7.620321 | 0.998994 | NRP2, SLC2   | 638        | 2256     | 18012     | 0.713308    | 1          |
| 75    | 10.02674 | 0.999398 | NRP2, JPH4   | 638        | 2880     | 18012     | 0.735208    | 1          |
| 92    | 12.29947 | 0.999903 | NRP2, ANO    | 638        | 3563     | 18012     | 0.728976    | 1          |
| 168   | 22.45989 | 0.999999 | FAM189B, F   | 728        | 6938     | 22680     | 0.754374    | 1          |
| 168   | 22.45989 | 0.999999 | FAM189B, F   | 728        | 6955     | 22680     | 0.75253     | 1          |
| 169   | 22.59358 |          | 1 FAM189B, F | 695        | 6878     | 19662     | 0.695132    | 1          |

| Count | %        | PValue   | Genes      | List Total | Pop Hits | Pop Total | Fold Enrich | Bonferroni |
|-------|----------|----------|------------|------------|----------|-----------|-------------|------------|
| 10    | 1.336898 | 0.462736 | NETO2, EP  | 695        | 239      | 19662     | 1.183709    | 1          |
| 12    | 1.604278 | 0.595847 | CPT1C, PRF | 728        | 357      | 22680     | 1.047188    | 1          |
| 17    | 2.272727 | 0.706468 | NETO2, CP  | 695        | 505      | 19662     | 0.952358    | 1          |
| 17    | 2.272727 | 0.903251 | CPT1C, SEP | 728        | 661      | 22680     | 0.801234    | 1          |
| 19    | 2.540107 | 0.952902 | CPT1C, NAI | 695        | 718      | 19662     | 0.748638    | 1          |

| Count | %        | PValue   | Genes      | List Total | Pop Hits | Pop Total | Fold Enrich | Bonferroni |
|-------|----------|----------|------------|------------|----------|-----------|-------------|------------|
| 4     | 0.534759 | 0.570062 | CACNG8, IT | 289        | 79       | 7720      | 1.352547    | 1          |
| 3     | 0.40107  | 0.749141 | CACNG8, IT | 289        | 71       | 7720      | 1.12871     | 1          |
| 3     | 0.40107  | 0.821892 | CACNG8, IT | 289        | 83       | 7720      | 0.965523    | 1          |

| Count | %        | PValue   | Genes      | List Total | Pop Hits | Pop Total | Fold Enrich | Bonferroni |
|-------|----------|----------|------------|------------|----------|-----------|-------------|------------|
| 5     | 0.668449 | 0.57792  | TRP53, NAI | 728        | 126      | 22680     | 1.236264    | 1          |
| 5     | 0.668449 | 0.691775 | TRP53, NAI | 661        | 128      | 18082     | 1.068575    | 1          |
| 3     | 0.40107  | 0.908867 | TRP53, NAI | 661        | 108      | 18082     | 0.759876    | 1          |

| Count | %        | PValue   | Genes      | List Total | Pop Hits | Pop Total | Fold Enrich | Bonferroni |
|-------|----------|----------|------------|------------|----------|-----------|-------------|------------|
| 8     | 1.069519 | 0.072665 | LINGO1, FL | 638        | 103      | 18012     | 2.192775    | 1          |
| 4     | 0.534759 | 0.880881 | LINGO1, FL | 702        | 147      | 20594     | 0.798263    | 1          |
| 10    | 1.336898 | 0.97302  | LINGO1, FL | 728        | 481      | 22680     | 0.647689    | 1          |
| 4     | 0.534759 | 0.989825 | LINGO1, FL | 702        | 242      | 20594     | 0.484896    | 1          |
| 4     | 0.534759 | 0.990877 | LINGO1, FL | 360        | 242      | 10425     | 0.47865     | 1          |
| 8     | 1.069519 | 0.998948 | LINGO1, FL | 702        | 518      | 20594     | 0.453068    | 1          |
| 8     | 1.069519 | 0.999187 | LINGO1, FL | 360        | 518      | 10425     | 0.447233    | 1          |
| 20    | 2.673797 | 0.999792 | H2-Q4, FLT | 702        | 1099     | 20594     | 0.53387     | 1          |
| 13    | 1.737968 | 0.999985 | LINGO1, H2 | 702        | 920      | 20594     | 0.414533    | 1          |

| Count | %        | PValue   | Genes     | List Total | Pop Hits | Pop Total | Fold Enrich | Bonferroni |
|-------|----------|----------|-----------|------------|----------|-----------|-------------|------------|
| 6     | 0.802139 | 0.610094 | LGALS3BP, | 638        | 149      | 18012     | 1.136858    | 1          |
| 6     | 0.802139 | 0.875534 | LGALS3BP, | 360        | 218      | 10425     | 0.797018    | 1          |
| 6     | 0.802139 | 0.8777   | LGALS3BP, | 702        | 222      | 20594     | 0.79287     | 1          |
| 6     | 0.802139 | 0.899649 | LGALS3BP, | 702        | 232      | 20594     | 0.758694    | 1          |

| Count | %        | PValue   | Genes      | List Total | Pop Hits | Pop Total | Fold Enrich | Bonferroni |
|-------|----------|----------|------------|------------|----------|-----------|-------------|------------|
| 8     | 1.069519 | 0.700506 | LAMA3, ER  | 702        | 237      | 20594     | 0.990251    | 1          |
| 3     | 0.40107  | 0.706293 | EREG, HBE  | 638        | 69       | 18012     | 1.227477    | 1          |
| 7     | 0.935829 | 0.727324 | EREG, HBE  | 728        | 224      | 22680     | 0.973558    | 1          |
| 3     | 0.40107  | 0.802495 | NID1, CNT  | 638        | 84       | 18012     | 1.008285    | 1          |
| 5     | 0.668449 | 0.906517 | EREG, HBE  | 702        | 197      | 20594     | 0.744573    | 1          |
| 3     | 0.40107  | 0.907522 | NID1, CNT  | 638        | 111      | 18012     | 0.763026    | 1          |
| 4     | 0.534759 | 0.951791 | LAMA3, NII | 360        | 181      | 10425     | 0.639963    | 1          |

| Count | %        | PValue   | Genes      | List Total | Pop Hits | Pop Total | Fold Enrich | Bonferroni |
|-------|----------|----------|------------|------------|----------|-----------|-------------|------------|
| 3     | 0.40107  | 0.685952 | PCDH7, PCI | 702        | 69       | 20594     | 1.275486    | 1          |
| 4     | 0.534759 | 0.802784 | CLSTN1, PC | 702        | 125      | 20594     | 0.938758    | 1          |
| 4     | 0.534759 | 0.805625 | CLSTN1, PC | 360        | 124      | 10425     | 0.93414     | 1          |
| 4     | 0.534759 | 0.811348 | CLSTN1, PC | 702        | 127      | 20594     | 0.923974    | 1          |
| 3     | 0.40107  | 0.906467 | PCDH7, PCI | 702        | 115      | 20594     | 0.765292    | 1          |
| 4     | 0.534759 | 0.93987  | CLSTN1, PC | 661        | 163      | 18082     | 0.671301    | 1          |

| Count | %        | PValue   | Genes      | List Total | Pop Hits | Pop Total | Fold Enrich | Bonferroni |
|-------|----------|----------|------------|------------|----------|-----------|-------------|------------|
| 5     | 0.668449 | 0.496622 | LINGO1, PF | 638        | 103      | 18012     | 1.370484    | 1          |
| 4     | 0.534759 | 0.606358 | LINGO1, TL | 638        | 88       | 18012     | 1.283272    | 1          |
| 5     | 0.668449 | 0.636875 | LINGO1, PF | 638        | 123      | 18012     | 1.147641    | 1          |

|   |          |          |            |     |     |       |          |   |
|---|----------|----------|------------|-----|-----|-------|----------|---|
| 3 | 0.40107  | 0.674779 | LINGO1, TL | 638 | 65  | 18012 | 1.303014 | 1 |
| 5 | 0.668449 | 0.702261 | LINGO1, PF | 638 | 134 | 18012 | 1.053432 | 1 |
| 3 | 0.40107  | 0.774036 | LINGO1, TL | 638 | 79  | 18012 | 1.0721   | 1 |
| 5 | 0.668449 | 0.814321 | LINGO1, PF | 638 | 158 | 18012 | 0.893417 | 1 |
| 5 | 0.668449 | 0.909688 | LINGO1, PF | 638 | 191 | 18012 | 0.739057 | 1 |
| 4 | 0.534759 | 0.939924 | LINGO1, PF | 702 | 175 | 20594 | 0.670541 | 1 |
| 5 | 0.668449 | 0.942144 | LINGO1, PF | 638 | 210 | 18012 | 0.67219  | 1 |
| 6 | 0.802139 | 0.942416 | LINGO1, PF | 728 | 275 | 22680 | 0.67972  | 1 |
| 4 | 0.534759 | 0.94368  | LINGO1, PF | 360 | 175 | 10425 | 0.661905 | 1 |
| 5 | 0.668449 | 0.962699 | LINGO1, PF | 638 | 228 | 18012 | 0.619122 | 1 |
| 5 | 0.668449 | 0.978092 | LINGO1, PF | 702 | 259 | 20594 | 0.566336 | 1 |
| 5 | 0.668449 | 0.980202 | LINGO1, PF | 638 | 253 | 18012 | 0.557944 | 1 |
| 5 | 0.668449 | 0.988585 | LINGO1, PF | 638 | 274 | 18012 | 0.515182 | 1 |
| 5 | 0.668449 | 0.988585 | LINGO1, PF | 638 | 274 | 18012 | 0.515182 | 1 |

| Count | %        | PValue   | Genes      | List Total | Pop Hits | Pop Total | Fold Enrich | Bonferroni |
|-------|----------|----------|------------|------------|----------|-----------|-------------|------------|
| 5     | 0.668449 | 0.730864 | KCNQ5, CA  | 661        | 135      | 18082     | 1.013167    | 1          |
| 4     | 0.534759 | 0.815483 | KCNQ5, CA  | 728        | 136      | 22680     | 0.91629     | 1          |
| 4     | 0.534759 | 0.874502 | KCNQ5, CA  | 642        | 134      | 17446     | 0.811178    | 1          |
| 7     | 0.935829 | 0.960389 | KCNQ5, P2I | 728        | 336      | 22680     | 0.649038    | 1          |

| Count | %        | PValue   | Genes      | List Total | Pop Hits | Pop Total | Fold Enrich | Bonferroni |
|-------|----------|----------|------------|------------|----------|-----------|-------------|------------|
| 5     | 0.668449 | 0.85403  | IMMP2L, H  | 642        | 163      | 17446     | 0.833572    | 1          |
| 6     | 0.802139 | 0.893553 | IMMP2L, H  | 642        | 212      | 17446     | 0.769088    | 1          |
| 4     | 0.534759 | 0.918614 | HTRA1, PC9 | 728        | 173      | 22680     | 0.72032     | 1          |

| Count | %        | PValue   | Genes      | List Total | Pop Hits | Pop Total | Fold Enrich | Bonferroni |
|-------|----------|----------|------------|------------|----------|-----------|-------------|------------|
| 17    | 2.272727 | 0.842946 | CACNG8, A  | 728        | 619      | 22680     | 0.855598    | 1          |
| 16    | 2.139037 | 0.943204 | CACNG8, A  | 661        | 584      | 18082     | 0.749466    | 1          |
| 7     | 0.935829 | 0.960389 | KCNQ5, P2I | 728        | 336      | 22680     | 0.649038    | 1          |

| Count | %        | PValue   | Genes       | List Total | Pop Hits | Pop Total | Fold Enrich | Bonferroni |
|-------|----------|----------|-------------|------------|----------|-----------|-------------|------------|
| 4     | 0.534759 | 0.839255 | RPL7, IGF2I | 638        | 129      | 18012     | 0.87541     | 1          |
| 4     | 0.534759 | 0.903835 | RPL7, IGF2I | 638        | 150      | 18012     | 0.752853    | 1          |
| 3     | 0.40107  | 0.910163 | RPL7, IGF2I | 638        | 112      | 18012     | 0.756214    | 1          |
| 4     | 0.534759 | 0.974411 | RPL7, IGF2I | 638        | 200      | 18012     | 0.564639    | 1          |
| 4     | 0.534759 | 0.97645  | RPL7, IGF2I | 638        | 203      | 18012     | 0.556295    | 1          |

| Count | %        | PValue   | Genes      | List Total | Pop Hits | Pop Total | Fold Enrich | Bonferroni |
|-------|----------|----------|------------|------------|----------|-----------|-------------|------------|
| 8     | 1.069519 | 0.825065 | S100A6, EF | 702        | 273      | 20594     | 0.859668    | 1          |
| 4     | 0.534759 | 0.880913 | S100A6, EF | 360        | 145      | 10425     | 0.798851    | 1          |
| 3     | 0.40107  | 0.915234 | S100A6, PL | 638        | 114      | 18012     | 0.742947    | 1          |
| 3     | 0.40107  | 0.940434 | S100A6, PL | 638        | 126      | 18012     | 0.67219     | 1          |
| 4     | 0.534759 | 0.946894 | S100A6, S1 | 638        | 173      | 18012     | 0.652762    | 1          |
| 5     | 0.668449 | 0.948053 | S100A6, EF | 702        | 223      | 20594     | 0.657762    | 1          |

|   |          |          |            |     |     |       |          |   |
|---|----------|----------|------------|-----|-----|-------|----------|---|
| 4 | 0.534759 | 0.94828  | S100A6, S1 | 638 | 174 | 18012 | 0.649011 | 1 |
| 3 | 0.40107  | 0.983588 | S100A6, S1 | 702 | 175 | 20594 | 0.502906 | 1 |

| Count | %        | PValue   | Genes      | List Total | Pop Hits | Pop Total | Fold Enrich | Bonferroni |
|-------|----------|----------|------------|------------|----------|-----------|-------------|------------|
| 8     | 1.069519 | 0.865406 | APOBEC1, J | 728        | 307      | 22680     | 0.811827    | 1          |
| 3     | 0.40107  | 0.878878 | MAGOHB, C  | 289        | 96       | 7720      | 0.834775    | 1          |
| 9     | 1.203209 | 0.905387 | APOBEC1, J | 661        | 322      | 18082     | 0.764595    | 1          |
| 3     | 0.40107  | 0.996518 | C1QBP, MA  | 728        | 240      | 22680     | 0.389423    | 1          |
| 3     | 0.40107  | 0.998762 | C1QBP, MA  | 661        | 241      | 18082     | 0.340525    | 1          |

| Count | %        | PValue   | Genes      | List Total | Pop Hits | Pop Total | Fold Enrich | Bonferroni |
|-------|----------|----------|------------|------------|----------|-----------|-------------|------------|
| 16    | 2.139037 | 0.904551 | TRP53, TXN | 728        | 626      | 22680     | 0.796264    | 1          |
| 8     | 1.069519 | 0.955969 | SEPT3, CCN | 728        | 372      | 22680     | 0.669975    | 1          |
| 16    | 2.139037 | 0.964863 | TRP53, TXN | 661        | 614      | 18082     | 0.712847    | 1          |
| 6     | 0.802139 | 0.975516 | TADA2A, H  | 661        | 277      | 18082     | 0.592538    | 1          |
| 8     | 1.069519 | 0.984661 | SEPT3, CCN | 661        | 374      | 18082     | 0.585145    | 1          |
| 4     | 0.534759 | 0.990285 | HMGA2, TF  | 728        | 259      | 22680     | 0.48114     | 1          |

| Count | %        | PValue   | Genes      | List Total | Pop Hits | Pop Total | Fold Enrich | Bonferroni |
|-------|----------|----------|------------|------------|----------|-----------|-------------|------------|
| 46    | 6.149733 | 0.896285 | XDH, NAMI  | 695        | 1504     | 19662     | 0.865272    | 1          |
| 42    | 5.614973 | 0.977415 | XDH, NAMI  | 728        | 1685     | 22680     | 0.776535    | 1          |
| 46    | 6.149733 | 0.992809 | XDH, NAMI  | 695        | 1753     | 19662     | 0.742367    | 1          |
| 81    | 10.82888 | 0.999692 | NRP2, IGFB | 638        | 3124     | 18012     | 0.732007    | 1          |

| Count | %        | PValue   | Genes     | List Total | Pop Hits | Pop Total | Fold Enrich | Bonferroni |
|-------|----------|----------|-----------|------------|----------|-----------|-------------|------------|
| 7     | 0.935829 | 0.978608 | HOXC8, TA | 702        | 345      | 20594     | 0.595227    | 1          |
| 3     | 0.40107  | 0.987481 | HOXC8, HO | 702        | 184      | 20594     | 0.478307    | 1          |
| 3     | 0.40107  | 0.988633 | HOXC8, HO | 638        | 180      | 18012     | 0.470533    | 1          |
| 4     | 0.534759 | 0.994404 | HOXC8, ZH | 728        | 280      | 22680     | 0.445055    | 1          |
| 4     | 0.534759 | 0.995418 | HOXC8, ZH | 360        | 266      | 10425     | 0.435464    | 1          |
| 4     | 0.534759 | 0.995484 | HOXC8, ZH | 702        | 271      | 20594     | 0.433006    | 1          |

| Count | %        | PValue   | Genes      | List Total | Pop Hits | Pop Total | Fold Enrich | Bonferroni |
|-------|----------|----------|------------|------------|----------|-----------|-------------|------------|
| 108   | 14.4385  | 0.946132 | FAM189B, J | 728        | 3815     | 22680     | 0.881944    | 1          |
| 82    | 10.96257 | 0.986019 | NRP2, IGFB | 728        | 3124     | 22680     | 0.817739    | 1          |
| 57    | 7.620321 | 0.998994 | NRP2, SLC2 | 638        | 2256     | 18012     | 0.713308    | 1          |
| 75    | 10.02674 | 0.999398 | NRP2, JPH4 | 638        | 2880     | 18012     | 0.735208    | 1          |
| 81    | 10.82888 | 0.999692 | NRP2, IGFB | 638        | 3124     | 18012     | 0.732007    | 1          |
| 62    | 8.28877  | 0.999714 | NRP2, IGFB | 638        | 2510     | 18012     | 0.697364    | 1          |
| 92    | 12.29947 | 0.999903 | NRP2, ANO  | 638        | 3563     | 18012     | 0.728976    | 1          |
| 108   | 14.4385  | 0.999931 | RAB3GAP2,  | 728        | 4543     | 22680     | 0.740615    | 1          |

Benjamini FDR

|          |          |
|----------|----------|
| 1.88E-16 | 1.18E-16 |
| 3.17E-13 | 4.00E-13 |
| 7.51E-14 | 6.00E-13 |
| 8.63E-13 | 1.04E-11 |
| 6.27E-12 | 1.01E-10 |
| 5.70E-08 | 1.07E-07 |
| 3.35E-07 | 1.05E-06 |
| 1.26E-06 | 4.72E-06 |

Benjamini FDR

|          |          |
|----------|----------|
| 1.18E-07 | 3.33E-06 |
| 1.55E-07 | 4.98E-06 |
| 1.18E-04 | 0.005693 |
| 0.004556 | 0.024408 |

Benjamini FDR

|          |          |
|----------|----------|
| 2.21E-05 | 3.94E-05 |
| 1.23E-05 | 4.38E-05 |
| 4.63E-05 | 5.74E-05 |
| 4.63E-05 | 5.74E-05 |
| 2.66E-05 | 6.58E-05 |
| 6.30E-05 | 2.34E-04 |
| 0.015257 | 0.114176 |
| 0.138744 | 1.116542 |
| 0.076362 | 1.684312 |
| 0.032926 | 3.962477 |
| 0.716119 | 18.54298 |

Benjamini FDR

|          |          |
|----------|----------|
| 6.57E-08 | 1.65E-07 |
| 3.89E-04 | 0.001928 |
| 0.061512 | 1.124944 |
| 0.921557 | 68.2754  |

Benjamini FDR

|          |          |
|----------|----------|
| 6.49E-04 | 0.003384 |
| 3.27E-04 | 0.003409 |
| 4.25E-04 | 0.006641 |
| 0.009577 | 0.200489 |

Benjamini FDR

|          |          |
|----------|----------|
| 3.24E-06 | 1.17E-04 |
| 0.004584 | 0.350753 |

0.847444 16.0769

Benjamini FDR

2.46E-08 5.94E-07  
6.91E-04 0.044532  
0.003818 0.261443  
0.421981 5.670465  
0.202033 6.608607  
0.05441 6.953095  
0.492405 30.40677  
0.884187 47.70314

Benjamini FDR

0.003584 0.02223  
0.047849 0.696563  
0.007669 0.648674  
0.061512 1.124944  
0.875621 27.66343

Benjamini FDR

5.40E-04 0.030423  
0.015404 0.110597  
0.069491 0.49508  
0.028837 0.911206  
0.014097 1.418545  
0.644654 4.196029  
0.032182 3.7466  
0.32547 5.683602  
0.275011 11.84569  
0.688572 19.48397  
0.884848 21.82849  
0.769366 26.57019  
0.835334 37.44542  
0.887386 50.22691  
0.941409 69.71913

Benjamini FDR

0.026802 0.235244  
0.492824 0.7007  
0.083751 0.862839  
0.06303 1.268086  
0.89411 32.65594  
0.221494 37.7306  
0.980462 91.67256

Benjamini FDR  
0.016156 1.690274  
0.359571 12.61557  
0.485833 24.5596

Benjamini FDR  
0.029392 0.318464  
0.340182 4.528674  
0.340182 4.528674  
0.56974 3.803195  
0.57341 5.156622  
0.688572 19.48397  
0.782218 30.13929  
0.725881 25.73312  
0.966809 82.25706  
0.996159 99.00995

Benjamini FDR  
0.316506 4.603432  
0.353276 3.928294  
0.617149 14.32215  
0.797886 32.70184  
0.915548 43.06068

Benjamini FDR  
0.357206 4.067674  
0.446137 6.44526  
0.202033 6.608607  
0.524824 89.10027  
0.959236 98.52984

Benjamini FDR  
0.119081 3.02291  
0.640945 16.27164  
0.715671 19.16146  
0.688572 19.48397  
0.822197 33.71011  
0.891836 52.21432  
0.995637 99.4532

Benjamini FDR  
3.17E-05 0.001403  
4.75E-04 0.024843  
0.003729 0.270297  
0.029842 0.377207

|          |          |
|----------|----------|
| 0.047286 | 0.773886 |
| 0.326466 | 16.14422 |
| 0.773054 | 26.40453 |
| 0.863976 | 28.1506  |
| 0.155009 | 24.78031 |
| 0.902043 | 43.87045 |
| 0.743356 | 59.21112 |
| 0.953034 | 82.50864 |
| 0.962589 | 87.74892 |
| 0.969941 | 85.81686 |
| 0.880093 | 85.45136 |
| 0.98875  | 89.25714 |
| 0.989813 | 90.7012  |
| 0.980081 | 91.15169 |
| 0.996895 | 99.41959 |
| 0.81396  | 99.94549 |
| 0.993522 | 99.9984  |
| 0.996906 | 99.99757 |
| 1        | 100      |

Benjamini FDR

|          |          |
|----------|----------|
| 0.732481 | 22.99318 |
| 0.732481 | 22.99318 |
| 0.732481 | 22.99318 |
| 0.792271 | 19.48716 |
| 0.882386 | 25.03823 |
| 0.782218 | 30.13929 |
| 0.782218 | 30.13929 |
| 0.725881 | 25.73312 |
| 0.963306 | 78.89035 |

Benjamini FDR

|          |          |
|----------|----------|
| 0.084345 | 11.67483 |
| 0.493365 | 23.47117 |
| 0.844789 | 79.37289 |

Benjamini FDR

|          |          |
|----------|----------|
| 0.89411  | 32.65594 |
| 0.835334 | 37.44542 |
| 0.755969 | 32.23192 |
| 0.925351 | 64.24174 |

Benjamini FDR

|          |          |
|----------|----------|
| 0.782218 | 30.13929 |
| 0.867722 | 51.64049 |
| 0.867722 | 51.64049 |



Benjamini FDR

|          |          |
|----------|----------|
| 0.53454  | 2.348192 |
| 0.574624 | 4.330146 |
| 0.852513 | 17.98299 |
| 0.842221 | 42.2385  |
| 0.692612 | 38.62152 |
| 0.863577 | 49.88023 |
| 0.936639 | 52.42966 |
| 0.923918 | 62.80336 |
| 0.974947 | 75.65566 |
| 0.996622 | 95.85239 |
| 0.999765 | 99.69656 |
| 0.99552  | 99.9996  |

Benjamini FDR

|          |          |
|----------|----------|
| 0.516136 | 23.1739  |
| 0.742311 | 54.14441 |
| 0.352166 | 63.06759 |

Benjamini FDR

|          |          |
|----------|----------|
| 0.100653 | 14.97932 |
| 0.223562 | 38.67104 |
| 0.899954 | 56.04632 |
| 0.987275 | 97.13944 |

Benjamini FDR

|          |          |
|----------|----------|
| 0.335098 | 5.408011 |
| 0.082663 | 11.75316 |
| 0.302868 | 15.57433 |
| 0.465512 | 27.65616 |
| 0.835334 | 37.44542 |
| 0.746256 | 35.68414 |
| 0.851669 | 41.93283 |
| 0.843488 | 44.96399 |
| 0.732825 | 38.45764 |
| 0.94871  | 63.76788 |
| 0.754976 | 61.41748 |
| 0.789277 | 66.11671 |
| 0.816253 | 73.51004 |
| 0.959228 | 76.92017 |
| 0.988945 | 87.75016 |
| 0.987849 | 88.31622 |
| 0.960327 | 95.67968 |
| 0.999055 | 100      |

Benjamini FDR

|          |          |
|----------|----------|
| 0.867722 | 51.64049 |
| 0.867722 | 51.64049 |
| 0.730243 | 45.24957 |
| 0.989239 | 95.91994 |

Benjamini FDR

|          |          |
|----------|----------|
| 0.255239 | 44.08089 |
| 0.525196 | 66.29144 |
| 0.95928  | 85.98704 |

Benjamini FDR

|          |          |
|----------|----------|
| 0.802812 | 31.36225 |
| 0.876092 | 45.21498 |
| 0.891916 | 52.88724 |
| 0.938216 | 74.78781 |
| 0.990558 | 98.1172  |
| 0.998603 | 99.94204 |

Benjamini FDR

|          |          |
|----------|----------|
| 0.796994 | 29.91428 |
| 0.792606 | 25.12141 |
| 0.822425 | 37.55645 |
| 0.9218   | 42.55335 |
| 0.908521 | 43.43285 |
| 0.254805 | 44.67546 |
| 0.946134 | 60.85751 |
| 0.946134 | 60.85751 |
| 0.984488 | 94.1442  |
| 0.997995 | 97.0953  |
| 0.999642 | 99.4808  |
| 0.999867 | 99.87146 |
| 0.99994  | 99.98272 |

Benjamini FDR

|          |          |
|----------|----------|
| 0.856651 | 40.01532 |
| 0.941409 | 69.71913 |
| 0.993219 | 98.82285 |

Benjamini FDR

|          |          |
|----------|----------|
| 0.076569 | 10.04112 |
| 0.711013 | 19.56686 |
| 0.463437 | 55.58158 |
| 0.482924 | 83.99001 |

|          |          |
|----------|----------|
| 0.632431 | 90.44654 |
| 0.999779 | 99.99065 |
| 0.999779 | 99.99065 |

Benjamini FDR

|          |          |
|----------|----------|
| 0.093163 | 13.5541  |
| 0.346303 | 17.87814 |
| 0.741573 | 58.02438 |
| 0.975172 | 93.4036  |
| 0.990437 | 97.18527 |
| 0.990934 | 97.45116 |
| 0.997878 | 99.86828 |
| 0.999872 | 99.92155 |

Benjamini FDR

|          |          |
|----------|----------|
| 0.869875 | 25.5991  |
| 0.89411  | 32.65594 |
| 0.89411  | 32.65594 |
| 0.89411  | 32.65594 |
| 0.89411  | 32.65594 |
| 0.89411  | 32.65594 |
| 0.917486 | 40.3571  |
| 0.917486 | 40.3571  |
| 0.91929  | 47.8849  |
| 0.91929  | 47.8849  |
| 0.936481 | 55.03951 |
| 0.935828 | 56.1705  |
| 0.941828 | 58.67938 |
| 0.989815 | 87.63596 |
| 0.988945 | 87.75016 |
| 0.992273 | 92.33742 |
| 0.999868 | 99.89351 |
| 0.999979 | 99.99749 |
| 0.861479 | 99.99287 |
| 0.997528 | 99.99516 |
| 0.999949 | 99.99962 |
| 0.999978 | 99.99994 |
| 1        | 100      |
| 1        | 100      |
| 1        | 100      |

Benjamini FDR

|          |          |
|----------|----------|
| 0.212459 | 8.160154 |
| 0.305797 | 18.8877  |
| 0.877127 | 86.19572 |
| 0.817945 | 99.93129 |
| 0.82213  | 99.9566  |

0.913094 99.99995

Benjamini FDR

0.92067 65.48  
0.339944 60.79924  
0.48323 83.58589  
0.996704 99.67473

Benjamini FDR

0.28002 49.05679  
0.948752 80.1957  
0.407704 71.77542  
0.419849 75.93961  
0.961507 86.73592  
0.999363 99.99096

Benjamini FDR

0.148848 23.35515  
0.178494 29.40716  
0.594027 40.19384  
0.754976 61.41748  
0.792727 67.4295  
0.965358 82.60698  
0.999995 100  
0.999999 100  
0.999999 100

Benjamini FDR

0.725692 55.37029  
0.920084 66.97918  
0.789277 66.11671  
0.391864 68.6888  
0.990603 90.64051  
0.963004 86.06153  
0.981059 92.59832  
0.999995 100

Benjamini FDR

0.874163 48.96573  
0.980152 90.73191  
0.981059 92.59832

Benjamini FDR

0.344659 60.76578

|          |          |
|----------|----------|
| 0.9736   | 76.96321 |
| 0.966809 | 82.25706 |
| 0.966809 | 82.25706 |
| 0.986402 | 84.58154 |
| 0.986402 | 84.58154 |
| 0.992856 | 99.99743 |

Benjamini FDR

|          |          |
|----------|----------|
| 0.194662 | 33.02676 |
| 0.905253 | 58.3362  |
| 0.928708 | 70.60309 |
| 0.81297  | 71.48583 |
| 0.810783 | 73.68608 |
| 0.96391  | 82.94843 |
| 0.905845 | 89.70715 |
| 0.979569 | 91.83709 |
| 0.962073 | 87.82889 |
| 0.984277 | 95.47557 |
| 0.992457 | 98.62419 |
| 0.983627 | 99.9693  |
| 0.999638 | 99.99731 |

Benjamini FDR

|          |          |
|----------|----------|
| 0.433918 | 39.61087 |
| 0.422737 | 74.05493 |
| 0.536321 | 74.39713 |
| 0.901915 | 89.72801 |
| 0.90454  | 90.40764 |
| 0.890907 | 89.05793 |
| 0.981914 | 94.71891 |
| 0.767508 | 99.64076 |

Benjamini FDR

|          |          |
|----------|----------|
| 0.942571 | 71.01742 |
| 0.956162 | 88.42877 |
| 0.988113 | 95.37617 |

Benjamini FDR

|          |          |
|----------|----------|
| 0.973344 | 75.98852 |
| 0.973344 | 75.98852 |
| 0.976894 | 96.27893 |
| 0.996042 | 99.1149  |

Benjamini FDR

|          |          |
|----------|----------|
| 0.663482 | 48.30851 |
|----------|----------|

0.524824 89.10027  
0.987715 99.98877

Benjamini FDR

0.741573 58.02438  
0.939678 68.26089  
0.977784 98.21467  
0.997082 99.55801  
0.999848 99.82944

Benjamini FDR

0.94097 54.67599  
0.322249 55.70088  
0.40023 70.30268  
0.964377 99.27909  
0.999872 99.92155  
0.999994 99.99999

Benjamini FDR

0.973545 77.79537  
0.972139 85.78802  
0.959099 80.14294  
0.999995 100

Benjamini FDR

0.9965 95.51457  
0.9965 95.51457  
0.9965 95.51457  
0.9965 95.51457

Benjamini FDR

0.963744 79.85408  
0.976853 88.29747  
0.996552 99.44632  
0.976315 98.6459

Benjamini FDR

0.882234 23.34559  
0.797886 32.70184  
0.835074 45.2636  
0.990162 96.38339  
0.997644 99.75087  
0.999872 99.92155  
0.990227 99.68016

0.999781 99.99165  
0.996759 99.98328  
0.999885 99.99835  
0.999948 99.9997

Benjamini FDR

0.988786 88.22906  
0.980462 91.67256  
0.999797 99.74887  
0.999797 99.74887

Benjamini FDR

0.979106 93.68687  
0.991509 98.33068  
0.998017 99.88674

Benjamini FDR

0.356596 14.8664  
0.328986 15.33054  
0.322511 18.37314  
0.304849 20.34869  
0.302311 21.65136  
0.41108 33.90597  
0.439403 43.6362  
0.431094 44.46608  
0.469058 53.19702  
0.473497 55.19003  
0.518731 64.28298  
0.528432 71.46883  
0.529589 72.68117  
0.575258 80.8313  
0.590572 82.95472  
0.59003 83.68627  
0.660954 92.93897  
0.669401 94.08588  
0.662426 94.10524  
0.687453 95.72847  
0.688681 96.25801  
0.688681 96.25801  
0.691275 96.9589  
0.691675 97.15088  
0.735951 98.74006  
0.751602 99.28303  
0.757471 99.38821  
0.770965 99.6046  
0.778244 99.78135  
0.788297 99.83303

|          |          |
|----------|----------|
| 0.787324 | 99.84304 |
| 0.809984 | 99.91003 |
| 0.827515 | 99.9655  |
| 0.82581  | 99.97256 |
| 0.822854 | 99.97286 |
| 0.838445 | 99.98682 |
| 0.837527 | 99.98767 |
| 0.866733 | 99.99727 |
| 0.89409  | 99.99954 |
| 0.999977 | 100      |
| 0.902523 | 99.99989 |
| 0.920527 | 99.99998 |
| 0.924482 | 99.99999 |
| 0.950232 | 100      |
| 0.958201 | 100      |
| 0.971965 | 100      |
| 0.973109 | 100      |
| 0.980976 | 100      |
| 0.983229 | 100      |
| 0.98856  | 100      |
| 0.994014 | 100      |
| 0.995769 | 100      |
| 0.998626 | 100      |

Benjamini FDR

|          |          |
|----------|----------|
| 0.936639 | 52.42966 |
| 0.974947 | 75.65566 |
| 0.996622 | 95.85239 |
| 0.999386 | 99.19756 |
| 0.99961  | 99.53275 |
| 0.999765 | 99.69656 |
| 0.999929 | 99.97778 |
| 0.999944 | 99.98667 |
| 0.999964 | 99.99276 |
| 0.999981 | 99.99834 |

Benjamini FDR

|          |          |
|----------|----------|
| 0.987727 | 96.98295 |
| 0.611086 | 95.5723  |
| 0.667831 | 97.79697 |
| 0.996712 | 99.69797 |
| 0.965515 | 99.35291 |

Benjamini FDR

|          |          |
|----------|----------|
| 0.995552 | 98.72113 |
| 0.999156 | 98.85661 |
| 0.976211 | 97.29344 |



Benjamini FDR

|          |          |
|----------|----------|
| 0.506615 | 87.09478 |
| 0.902595 | 91.70964 |
| 0.709491 | 99.02215 |
| 0.976236 | 99.86361 |
| 0.999007 | 99.97449 |

Benjamini FDR

|          |          |
|----------|----------|
| 0.322249 | 55.70088 |
| 0.926308 | 70.63219 |
| 0.789661 | 67.98861 |
| 0.991746 | 98.46573 |
| 0.964427 | 99.18975 |
| 0.96647  | 99.45026 |
| 0.99773  | 99.74104 |
| 0.999882 | 99.91924 |
| 0.99917  | 99.93762 |
| 0.991508 | 99.78424 |
| 0.99992  | 99.96353 |
| 0.991231 | 99.81912 |
| 0.999579 | 99.97461 |
| 0.999999 | 100      |

Benjamini FDR

|          |          |
|----------|----------|
| 0.852291 | 75.06851 |
| 0.975709 | 99.90652 |
| 0.798401 | 99.90531 |

Benjamini FDR

|          |          |
|----------|----------|
| 0.506615 | 87.09478 |
| 0.902595 | 91.70964 |
| 0.90656  | 92.39796 |
| 0.993134 | 98.77213 |
| 0.998065 | 99.89394 |
| 0.975654 | 99.86678 |
| 0.99999  | 100      |

Benjamini FDR

|          |          |
|----------|----------|
| 0.58188  | 83.77478 |
| 0.748339 | 99.54249 |
| 0.985034 | 99.96686 |

Benjamini FDR

|          |          |
|----------|----------|
| 0.812819 | 74.68086 |
| 0.985588 | 94.13015 |
| 0.672246 | 98.16176 |
| 0.891511 | 99.99902 |
| 0.997953 | 99.99996 |

Benjamini FDR

|          |          |
|----------|----------|
| 0.975294 | 88.91861 |
| 0.99061  | 97.05935 |
| 1        | 100      |

Benjamini FDR

|          |          |
|----------|----------|
| 0.810783 | 73.68608 |
| 0.999871 | 99.90486 |
| 1        | 100      |

Benjamini FDR

|          |          |
|----------|----------|
| 0.497001 | 85.57611 |
| 0.998064 | 97.33133 |
| 0.998459 | 99.86068 |
| 0.999872 | 99.88605 |
| 0.998832 | 99.96627 |
| 0.99998  | 99.99788 |
| 0.999882 | 99.99785 |

Benjamini FDR

|          |          |
|----------|----------|
| 0.923918 | 62.80336 |
| 0.999386 | 99.19756 |
| 0.999972 | 100      |
| 1        | 100      |

Benjamini FDR

|          |          |
|----------|----------|
| 0.655999 | 97.40403 |
| 0.968493 | 99.53013 |
| 0.999843 | 99.99967 |

Benjamini FDR

|          |          |
|----------|----------|
| 0.962182 | 80.25651 |
| 0.999327 | 99.95423 |
| 0.997245 | 99.99743 |
| 1        | 100      |

Benjamini FDR

|          |          |
|----------|----------|
| 0.81711  | 72.79574 |
| 0.833749 | 80.38626 |
| 0.958611 | 98.2216  |
| 0.997967 | 99.80066 |
| 0.999069 | 99.98103 |
| 0.999708 | 99.98596 |
| 0.99984  | 99.99527 |
| 1        | 100      |
| 0.999989 | 100      |
| 1        | 100      |

Benjamini FDR

|          |          |
|----------|----------|
| 0.992085 | 92.61871 |
| 0.990437 | 97.18527 |
| 0.999803 | 99.99334 |
| 0.995524 | 99.96501 |
| 1        | 100      |

Benjamini FDR

|          |          |
|----------|----------|
| 0.99592  | 99.02757 |
| 0.996552 | 99.44632 |
| 0.996824 | 99.58526 |
| 1        | 99.23305 |
| 1        | 100      |

Benjamini FDR

|          |          |
|----------|----------|
| 0.994264 | 98.32709 |
| 0.974873 | 96.61995 |
| 0.99592  | 99.02757 |
| 0.996609 | 99.27729 |
| 0.99998  | 99.99865 |
| 0.999896 | 99.99883 |
| 0.999896 | 99.99883 |
| 0.999896 | 99.99883 |
| 0.997094 | 99.99172 |

Benjamini FDR

|          |          |
|----------|----------|
| 0.747199 | 56.49522 |
| 0.971901 | 99.7382  |
| 0.795002 | 99.88431 |
| 0.845609 | 99.98491 |
| 0.992856 | 99.99743 |
| 0.989619 | 99.99453 |
| 0.98593  | 100      |

Benjamini FDR  
0.98057 98.14283  
0.99676 99.43843  
1 100

Benjamini FDR  
0.737993 99.37054  
0.986508 99.9784  
0.987268 99.98587

Benjamini FDR  
0.958611 98.2216  
0.954372 97.61758  
0.885522 99.99921  
0.953832 100

Benjamini FDR  
0.963744 79.85408  
1 100  
0.999973 100

Benjamini FDR  
0.996824 99.58526  
0.99987 99.99665  
0.999889 99.99859

Benjamini FDR  
0.691298 96.11497  
0.744524 99.08681  
0.911013 99.99982  
0.999042 100

Benjamini FDR  
0.669401 94.08588  
0.84022 99.98969  
0.930889 100

Benjamini FDR  
0.548163 91.19995  
0.686054 98.63015  
0.967263 99.37188  
0.997998 99.88101  
0.970137 99.73947

|          |          |
|----------|----------|
| 0.999742 | 99.99903 |
| 0.999964 | 99.99999 |
| 0.999995 | 100      |
| 0.998846 | 100      |
| 0.999925 | 100      |

Benjamini FDR

|          |          |
|----------|----------|
| 0.999797 | 99.74887 |
| 0.999929 | 99.97549 |
| 0.999963 | 99.99408 |
| 0.99999  | 99.99957 |
| 0.99999  | 99.99957 |

Benjamini FDR

|          |          |
|----------|----------|
| 0.781044 | 99.77525 |
| 0.824719 | 99.97058 |
| 0.989841 | 99.994   |

Benjamini FDR

|          |          |
|----------|----------|
| 0.612834 | 95.80112 |
| 0.799284 | 99.91836 |
| 0.999841 | 99.99968 |
| 0.867101 | 99.99543 |
| 0.999999 | 100      |

Benjamini FDR

|          |          |
|----------|----------|
| 0.997967 | 99.80066 |
| 0.993251 | 99.91943 |
| 0.999999 | 100      |

Benjamini FDR

|          |          |
|----------|----------|
| 0.607265 | 95.25174 |
| 0.996617 | 99.32778 |
| 0.996976 | 99.57479 |
| 0.980826 | 99.11442 |
| 0.999023 | 99.91949 |
| 0.999327 | 99.95423 |
| 0.999981 | 99.99859 |
| 0.999988 | 99.99945 |
| 0.999988 | 99.99945 |
| 0.999994 | 100      |
| 1        | 100      |
| 1        | 100      |
| 1        | 100      |
| 1        | 100      |

Benjamini FDR

|          |          |
|----------|----------|
| 0.975746 | 92.46912 |
| 0.999992 | 99.99975 |
| 0.924515 | 99.99996 |
| 0.999999 | 100      |
| 0.999974 | 100      |

Benjamini FDR

|          |          |
|----------|----------|
| 0.772046 | 99.71463 |
| 0.82072  | 99.95082 |
| 0.899063 | 99.99985 |
| 0.997401 | 99.99999 |

Benjamini FDR

|          |          |
|----------|----------|
| 0.976054 | 99.89405 |
| 0.999979 | 99.99803 |
| 0.997148 | 99.99531 |
| 0.999952 | 99.99969 |
| 0.999994 | 99.99984 |
| 0.999385 | 100      |

Benjamini FDR

|          |          |
|----------|----------|
| 0.999948 | 99.98874 |
| 0.999952 | 99.99969 |
| 0.925312 | 99.99996 |
| 0.999711 | 99.99999 |

Benjamini FDR

|          |          |
|----------|----------|
| 0.971321 | 99.68471 |
| 0.919802 | 99.99992 |
| 0.999992 | 100      |
| 0.999998 | 100      |

Benjamini FDR

|          |          |
|----------|----------|
| 0.999891 | 99.99782 |
| 0.865759 | 99.99479 |
| 0.91442  | 99.99987 |
| 0.999159 | 100      |

Benjamini FDR

|          |          |
|----------|----------|
| 0.994823 | 99.99924 |
| 0.996729 | 99.99984 |

0.999995 100

Benjamini FDR

0.999969 99.99588  
0.999989 99.99998  
0.999977 100

Benjamini FDR

0.999895 99.99834  
0.845229 99.99202  
0.99508 99.99946  
0.999947 99.99973  
0.999999 100  
0.99987 100  
0.999982 100

Benjamini FDR

0.999978 99.99995  
0.999418 99.99992  
1 100  
0.999996 100

Benjamini FDR

0.477088 25.49488  
1 100  
0.999765 100  
1 100  
1 100  
1 100  
1 100  
1 100  
1 100

Benjamini FDR

0.986598 99.986  
0.898245 99.99956  
0.998013 100  
0.992579 100  
0.99999 100

Benjamini FDR

0.872627 99.99826  
0.940537 100  
0.96422 100

Benjamini FDR  
0.890154 99.9992  
0.999995 100  
1 100

Benjamini FDR  
0.966383 71.77733  
1 100  
0.999067 100  
1 100  
1 100  
1 100  
1 100  
1 100  
1 100

Benjamini FDR  
0.999999 99.99999  
0.999994 100  
1 100  
1 100

Benjamini FDR  
0.999999 100  
1 100  
0.950628 100  
1 100  
1 100  
1 100  
1 100

Benjamini FDR  
0.999998 100  
1 100  
0.999979 100  
1 100  
1 100  
1 100

Benjamini FDR  
0.999981 99.999  
0.999999 99.99998  
1 100



|          |     |
|----------|-----|
| 1        | 100 |
| 1        | 100 |
| 1        | 100 |
| 1        | 100 |
| 1        | 100 |
| 1        | 100 |
| 1        | 100 |
| 1        | 100 |
| 0.996684 | 100 |
| 1        | 100 |
| 1        | 100 |
| 1        | 100 |
| 1        | 100 |
| 1        | 100 |
| 1        | 100 |
| 1        | 100 |

Benjamini FDR

|          |     |
|----------|-----|
| 0.999998 | 100 |
| 0.975504 | 100 |
| 0.999988 | 100 |
| 0.998178 | 100 |

Benjamini FDR

|          |     |
|----------|-----|
| 0.999978 | 100 |
| 0.999994 | 100 |
| 0.994316 | 100 |

Benjamini FDR

|          |     |
|----------|-----|
| 0.981413 | 100 |
| 1        | 100 |
| 0.998178 | 100 |

Benjamini FDR

|   |     |
|---|-----|
| 1 | 100 |
| 1 | 100 |
| 1 | 100 |
| 1 | 100 |
| 1 | 100 |

Benjamini FDR

|          |     |
|----------|-----|
| 1        | 100 |
| 0.999994 | 100 |
| 1        | 100 |
| 1        | 100 |
| 1        | 100 |
| 1        | 100 |
