# Supplementary material for: Mutant p53-dependent mitochondrial metabolic alterations in a mesenchymal stem cell-based model of progressive malignancy
Source: PubMed Central journal article supplement (PMC6748146; doi:10.1038/s41418-018-0227-z), 2018-11-09
Supplement: 41418_2018_227_MOESM5_ESM.pdf [file 41418_2018_227_MOESM5_ESM.pdf]

## Table S1. Related to Material and Methods

### Primers Used in this Study, Related to Experimental Procedures

#### Primers for cDNA relative to mouse cells

|                |                                    |
|----------------|------------------------------------|
| Glut1 F        | CAGTTCGGCTATAAACTGGTG              |
| Glut1 R        | GCCCCGACAGAGAAGATG                 |
| Glut3 F        | ATGGGGACAACGAAGGTGAC               |
| Glut3 R        | GTCTCAGGTGCATTGATGACTC             |
| Hexokinase 2 F | TGATCGCCTGCTTATTCACGG              |
| Hexokinase 2 R | AACCGCCTAGAAATCTCCAGA              |
| PDK1 F         | GGACTTCGGGTCAGTGAATGC              |
| PDK1 R         | TCCTGAGAAGATTGTCGGGGA              |
| MCT1 F         | ACGCCGGAGTCTTTGGATTT               |
| MCT1 R         | TGAGGCGGCCTAAAAGTGG                |
| Slc1A5 F       | CATCAACGACTCTGTTGTAGACC            |
| Slc1A5 R       | CGCTGGATACAGGATTGCGG               |
| POLG2 F        | GAGCAACTCCATTCAAAGTACGA            |
| POLG2 R        | CATCGTGGTGTCTCTGCTCC               |
| Sox2 F         | AAAAAGCAGGCTTGATAACATGATGGAGACGG   |
| Sox2 R         | AGAAAGCTGGGTTTACATGTGCGACAGGGGCAGT |
| CD44 F         | CACCATTGCCTCAACTGTGC               |
| CD44 R         | TTGTGGGCTCCTGAGTCTGA               |
| MGST2 F        | TGCCTGTCAGCAAAGTTATTTTCG           |
| MGST2 R        | CTGGGGGTGCAATCTTGTGT               |
| mGST $\pi$ 1 F | TACCCCTCTGTCTACGCAGC               |
| mGST $\pi$ 1 R | GCCCATACAGACAAGTGGGC               |

#### Primers for cDNA relative to human cells

|                |                        |
|----------------|------------------------|
| Glut1 F        | TCTGGCATCAACGCTGTCTT   |
| Glut1 R        | AGCCAATGGTGGCATAACA    |
| Hexokinase 2 F | ATTGCCGAATGCCTGGCTAA   |
| Hexokinase 2 R | CATGAGACCAGGAAACTCTCGT |
| LDH-A F        | AGCTGTTCCACTTAAGGCC    |
| LDH-A R        | TGGAACCAAAGGAATCGGGA   |
| PDK1 F         | TCCTGGACTTCGGATCAGTG   |
| PDK1 R         | TGCAACCATGTTCTTCTAGGC  |

#### Primers for internal controls

|        |                       |
|--------|-----------------------|
| HPRT F | TCAGTCAACGGGGGACATAAA |
| HPRT R | GGGGCTGTAAGTCTTAACAG  |

#### Primers for mtDNA quantification

|                       |                          |
|-----------------------|--------------------------|
| Mitoch. mouse mtND1 F | CTCTTATCCACGC TTCCGTTACG |
|-----------------------|--------------------------|

|                        |                          |
|------------------------|--------------------------|
| Mitoch. mouse mtND1 R  | GATGGTGGTACTCCCGCTGTA    |
| Mitoch. mouse mtCO-I F | ACTTGCAACCCTACACGGAGGTAA |
| Mitoch. mouse mtCO-I R | TCGTGAAGCACGATGTCAAGGGAT |
| Nucl. mouse H19 F      | GTACCCACCTGTCGTCC        |
| Nucl. mouse H19 R      | GTCCACGAGACCAATGACTG     |
| Nucl. Mouse Rp18S F    | ACCTGTCTTGATAACTGCCCGTGT |
| Nucl. Mouse Rp18S R    | TAATGGCAGTGATGGCGAAGGCTA |

*Table S1. Primer sequences used for qPCR. F, forward; R, reverse*
